# Supplementary material for: Photoredox-catalyzed oxo-amination of aryl cyclopropanes
Source: PubMed Central journal article supplement (PMC6761154; doi:10.1038/s41467-019-12403-2), 2019-09-25
Supplement: 41467_2019_12403_MOESM1_ESM.pdf [file 41467_2019_12403_MOESM1_ESM.pdf]

Supporting Information for  
**Photoredox-Catalyzed Oxo-Amination of Aryl  
Cyclopropanes**

Ge et al.

**Table of Contents**

|                                                                                                 |     |
|-------------------------------------------------------------------------------------------------|-----|
| Supplementary Methods .....                                                                     | 2   |
| Substrates Preparation.....                                                                     | 3   |
| Reaction Optimization .....                                                                     | 21  |
| General Procedure for Oxo-Amination of Aryl Cyclopropanes.....                                  | 27  |
| General Procedure for One-pot Aminoacylation of Olefins.....                                    | 27  |
| Supplementary Discussion.....                                                                   | 28  |
| Cyclic Voltammetry .....                                                                        | 28  |
| Emission Quenching Experiments (Stern-Volmer Studies) .....                                     | 29  |
| Light On/Off Experiment.....                                                                    | 31  |
| Determination of the Reaction Quantum Yield ( $\Phi$ ) .....                                    | 32  |
| Radical Inhibition Experiment with TEMPO.....                                                   | 37  |
| Evidence of Alkyl Hydroperoxide Intermediate .....                                              | 38  |
| Ruling Out the Intermediacy of 1,2-Dioxolane.....                                               | 38  |
| The Examination of Reactions Between Pyrazole and <b>1ak</b> , <b>1ba</b> and <b>1bb</b> .....  | 39  |
| The Examination of Aza-Nucleophiles with Different Oxidation Potentials .....                   | 40  |
| Experiment with Enantiometrically Enriched Diphenyl Cyclopropane .....                          | 41  |
| Regioselectivity Determination for Oxo-amination of Unsymmetrical Diaryl Cyclopropanes<br>..... | 47  |
| Characterization of Structurally Novel Compounds .....                                          | 53  |
| <sup>1</sup> H, and <sup>13</sup> C NMR Spectra of Structurally Novel Compounds .....           | 78  |
| Supplementary Reference .....                                                                   | 186 |

## Supplementary Methods

### General Information

Unless otherwise noted, all reactions were carried out under oxygen atmosphere. All commercially available reagents were used directly without further purification unless noted. All solvents were dried by passing through a column of neutral alumina under nitrogen prior to use. Organic solutions were concentrated under reduced pressure on an IKA RV 10 rotary evaporator. Chromatography was performed using silica gel with distilled solvents. Thin-layer chromatography (TLC) was performed on Silicycle 250  $\mu\text{m}$  silica gel plates visualized under UV light (254 nm) and dyed with cerous molybdate solution by heating.

HRMS spectra were recorded on a Xevo G2-XS QToF (Waters Corporation).  $^1\text{H}$  NMR and  $^{13}\text{C}$  NMR spectra were recorded using Bruker Avance 400 MHz spectrometers. Chemical shifts for  $^1\text{H}$  NMR spectra are reported as  $\delta$  in units of parts per million (ppm) downfield from  $\text{SiMe}_4$  ( $\delta$  0.0) and relative to the signal of chloroform-d ( $\delta$  7.26, singlet). Multiplicities were given as: s (singlet); d (doublet); t (triplet); q (quartet); dd (doublet of doublets); dt (doublet of triplets); m (multiplet), etc. Coupling constants are reported as a  $J$  value in Hz. Carbon nuclear magnetic resonance spectra ( $^{13}\text{C}$  NMR) are reported as  $\delta$  in units of parts per million (ppm) downfield from  $\text{SiMe}_4$  ( $\delta$  0.0) and relative to the signal of chloroform-d ( $\delta$  77.00, triplet).

The photocatalyst  $[\text{Ir}(\text{dF}(\text{CF}_3)\text{ppy})_2(4,4'\text{-dCF}_3\text{bpy})]\text{PF}_6$  (PC-III)<sup>2</sup>,  $\text{Ir}(\text{dF}(\text{CF}_3)\text{ppy})_2(5,5'\text{-dCF}_3\text{bpy})\text{PF}_6$  (PC-IV)<sup>2</sup> and (PC-II)<sup>3</sup> were prepared following literature procedures.  $\text{Acr-Mes-Me}^+\text{BF}_4^-$  (PC-I)<sup>1</sup>, PC-IX, and PC-XIII were purchased from Energy.

## Substrates Preparation

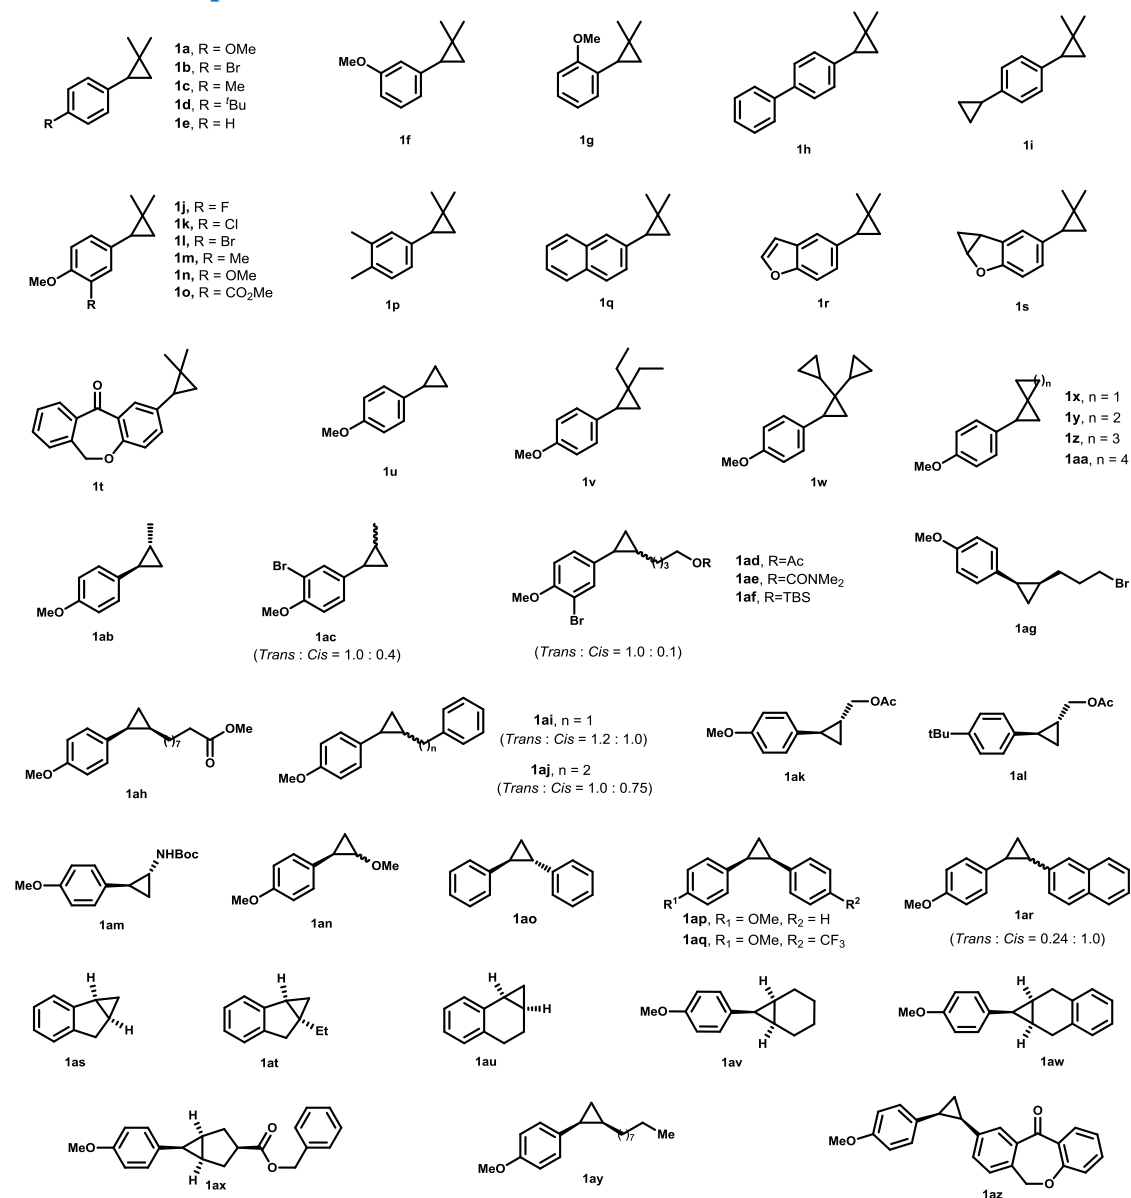

Compounds **1a**, **1c**, **1e**, **1f**, **1g**, **1n**, **1u**, **1x**, **1y**, **1ab**, **1ak**, **1am**, **1ao-1aq**, **1as**, **1au** and **1av** were prepared according to the literature procedures, and all the spectroscopic data are in agreement with the literature reports.

### General Procedure A for Aryl Cyclopropanes Synthesis<sup>4</sup>

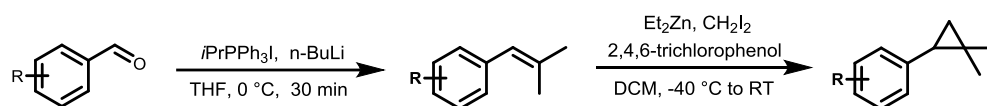

a) To a 150 mL oven-dried round-bottom flask equipped with a stir bar, the isopropyltriphenylphosphonium iodide (6.0 g, 13.88 mmol, 1.2 equiv) and anhydrous

THF (70 mL, 0.2 M) was added. The reaction flask was capped with rubber septum and charged with N<sub>2</sub> balloon and then the reaction mixture was cooled to 0 °C. *n*-BuLi (2.5 M, 5.6 mL, 14 mmol, 1.2 equiv) was added dropwise by syringe and the reaction mixture was stirred at this temperature for 30 min. The corresponding solution of aldehyde (11.6 mmol, 1.0 equiv) in THF (20 mL) was added by syringe and the reaction mixture was allowed to warm to room temperature, and then stirred for 16 h. After the reaction reached completion according to the TLC analysis, the reaction mixture was quenched by sat. NH<sub>4</sub>Cl (30 mL) and extracted with EtOAc (100mL) for 3 times. The combined organic layers were washed with H<sub>2</sub>O<sub>2</sub> (10 wt% in water, 10 mL) and brine (20 mL), dried over Na<sub>2</sub>SO<sub>4</sub> (20 g), and filtered. After the volatile materials were removed under reduced pressure, the crude residue was purified by column chromatography (PE : EtOAc = 50 : 1 to 10 : 1) to afford the desired alkene.

b) In a 150 mL oven-dried round-bottom flask with a stir bar, was added 2,4,6-trichlorophenol (1.18 g, 6.0 mmol, 2.5 equiv ) under nitrogen atmosphere. DCM (60 mL, 0.1 M) was added into the flask and the reaction mixture was cooled to -40 °C. ZnEt<sub>2</sub> (1.0 M, 6.0 mL, 6.0 mmol, 2.5 equiv) was added slowly into the flask by syringe and the reaction mixture was stirred at this temperature for 15 min. CH<sub>2</sub>I<sub>2</sub> (2.57 g, 9.6 mmol, 4.0 equiv) was added slowly by syringe and the reaction mixture was stirred at this temperature for another 15 min. Next, the corresponding solution of alkene (2.4 mmol, 1.0 equiv) in DCM (10 mL) was added by syringe and the reaction mixture was allowed to warm to room temperature and stirred for 16 h. After the reaction reached completion (as judged by <sup>1</sup>H-NMR of an aliquot removed from the reaction vessel and worked up by evaporation), the reaction mixture was quenched with sat. NH<sub>4</sub>Cl (30 mL) and extracted with DCM (100mL) for 3 times. The combined organic layers were washed with aq. NaOH (1.0 M, 30 mL) and brine (20 mL), dried over Na<sub>2</sub>SO<sub>4</sub> (20 g) and filtered. After the volatile materials were removed under reduced pressure, the crude residue was purified by column chromatography (PE : EtOAc = 50 : 1 to 10 : 1) to afford the desired compound.



Compounds **1a**, **1c**, **1e**, **1j-1n**, **1p** and **1q** were prepared following the General Procedure A. Overall yield: **1a** (1.36 mmol, 57%) as a colorless liquid; **1c** (1.42 mmol, 59%) as a colorless liquid; **1e** (1.22 mmol, 51%) as a colorless liquid; **1j** (1.34 mmol, 56%) as a colorless liquid; **1q** (1.08 mmol, 45%) as a colorless liquid; **1k** (1.22 mmol, 51%) as a colorless liquid; **1l** (1.13 mmol, 47%) as a colorless liquid; **1m** (1.46 mmol, 61%) as a colorless liquid; **1n** (1.63 mmol, 68%) as a colorless liquid, **1p** (1.32 mmol, 55%) as a white solid.

### General Procedure B for Aryl Cyclopropanes Synthesis<sup>5</sup>

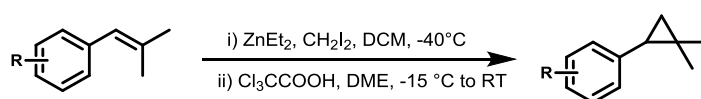

To a 50 mL oven-dried round-bottom flask equipped with a stir bar, was added DCM (3 mL, 0.67 M) under nitrogen atmosphere and was cooled to -40 °C. ZnEt<sub>2</sub> (2.0 M, 2.5 mL, 5.0 mmol, 2.5 equiv) was added followed by slow addition of a solution of CH<sub>2</sub>I<sub>2</sub> (2.68 g, 10.0 mmol, 5.0 equiv) in DCM (1 mL) by syringe. The reaction mixture was stirred at this temperature for 1 h followed by warming to -10 °C. Next, a the solution of trichloroacetic acid (60 mg, 0.4 mmol, 0.2 equiv) and DME (224 mg, 2.4 mmol, 1.2 equiv) in DCM (1 mL) was added dropwise into and the reaction mixture by syringe and the resulting solution was allowed to stir at -10 °C for another 1 h. A solution of corresponding alkene (2.0 mmol, 1.0 equiv) in DCM (1 mL) was then added by syringe and the reaction mixture was allowed to warmed to room temperature and stirred for 16 h. After the reaction reached completion (as judged by <sup>1</sup>H-NMR of an aliquot removed from the reaction vessel and worked up by evaporation), the reaction mixture was quenched with sat. NH<sub>4</sub>Cl (30 mL) and extracted with DCM (20 mL) for 3 times. The combined organic layers were washed with aq. NaOH (1.0 M, 30 mL) and brine (20 mL), dried over Na<sub>2</sub>SO<sub>4</sub> (20 g) and filtered. After the volatile materials were removed under reduced pressure, the crude residue was purified by column chromatography (PE : EtOAc = 50 : 1 to 10 : 1) to afford the corresponding title compound.

Compounds **1b**, **1d**, **1h** and **1o** were prepared following the General Procedure B. Over yield: **1b** (1.20 mmol, 60 %) as a colorless liquid; **1d** (1.28 mmol, 64%) as a colorless liquid; **1h** (0.94 mmol, 47%) as a colorless liquid; **1o** (0.82 mmol, 41%).

### General Procedure C for Diaryl Cyclopropanes Synthesis

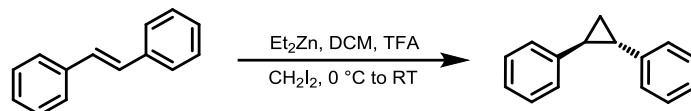

Following the literature method,<sup>6</sup> to a 50 mL oven-dried round-bottom flask with a stir bar was added DCM (3 mL, 0.67 M) under a nitrogen atmosphere. The flask was cooled to 0 °C. ZnEt<sub>2</sub> (2.0 M, 2.8 mL, 5.5 mmol, 5.5 equiv) was added dropwise and followed by dropwise addition of a solution of TFA (0.5 mL, 6.0 mmol, 6.0 equiv) in DCM (1 mL) by syringe over 15 min. The solution was then stirred at this temperature for 15 min. A solution of CH<sub>2</sub>I<sub>2</sub> (1.61 g, 6.0 mmol, 6.0 equiv) in DCM (1 mL) was added by syringe and the reaction mixture was stirred at this temperature for 1 h. Then a solution of the corresponding alkene (1 mmol, 1.0 equiv) in DCM (1 mL) was added by syringe and the reaction mixture was allowed to warm to room temperature and stirred for 20 h. After the reaction reached completion (as judged by <sup>1</sup>H-NMR of an aliquot removed from the reaction vessel and worked up by evaporation), the reaction mixture was quenched with sat. NH<sub>4</sub>Cl (30mL) and extracted with DCM (50 mL) for 3 times. The combined organic layers were washed with sat. NaHCO<sub>3</sub> (50 mL) and brine (20 mL), dried over Na<sub>2</sub>SO<sub>4</sub> (20 g) and filtered. After the volatile materials were removed under reduced pressure, the crude residue was purified by column chromatography (PE : EtOAc = 50 : 1 to 10 : 1) to afford the desired compound.

Compounds **1ao** was prepared following the General Procedure C. Overall yield: **1ao** (0.40 mmol, 40 %) as a colorless liquid.

### General Procedure D for Aryl Cyclopropanes Synthesis<sup>8</sup>

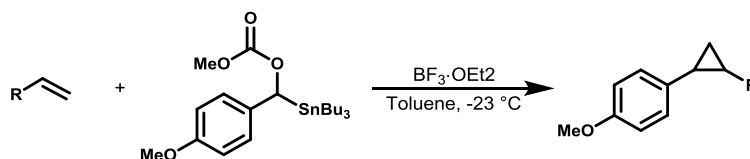

To a 50 mL oven-dried round-bottom flask equipped with a stir bar was added the solution of (4-methoxyphenyl)(tributylstannyl)methyl methyl carbonate<sup>8</sup> (486 mg, 1.0 mmol, 1.0 equiv) and the corresponding alkene (1.1 mmol, 1.0 equiv) in toluene (3.5 mL) under nitrogen atmosphere at room temperature. The reaction vessel was cooled to -23 °C. BF<sub>3</sub> OEt<sub>2</sub> (156 mg, 1.1 mmol, 1.1 equiv) was added by syringe and stirred at this temperature for 2 h. After the reaction reached completion according to the TLC analysis, the reaction mixture was quenched with sat. NaHCO<sub>3</sub> (10 mL) and extracted with EtOAc (30 mL) for 3 times. The combined organic layers were washed with brine (20 mL), dried over Na<sub>2</sub>SO<sub>4</sub> (20 g) and filtered. After the volatile materials were removed under reduced pressure, the crude residue was purified by column chromatography (PE : EtOAc = 50 : 1 to 10 : 1) to afford the target compound.

Compounds **1ag**, **1ah**, **1ap**, **1aq**, **1ar**, **1av**, **1aw**, **1ax**, **1ay** and **1az** were prepared following the General Procedure D.

Yields of **1ag** (*Cis*, 0.22 mmol, 22%) as a colorless liquid; **1ap** (*Cis*, 0.40 mmol, 40%) as a colorless liquid; **1aq** (*Cis*, 0.64 mol, 64%) as a colorless liquid; **1ar** (*Trans* : *Cis* = 1.0 : 0.1, 0.71 mmol, 71%) as a white solid; **1av** (*Cis*, 0.67 mmol, 67%) as a colorless liquid; **1aw** (*Cis*, 0.44 mmol, 44%) as a colorless liquid; **1ax** (*Cis*, 0.54 mmol, 54%) as a white solid; **1az** (*Cis*, 0.68 mmol, 68%) as a white solid; **1ay** (reaction solvent was DCE, *Cis* product, directly used for one-pot reaction).

### Synthesis of **1ak**<sup>7</sup>

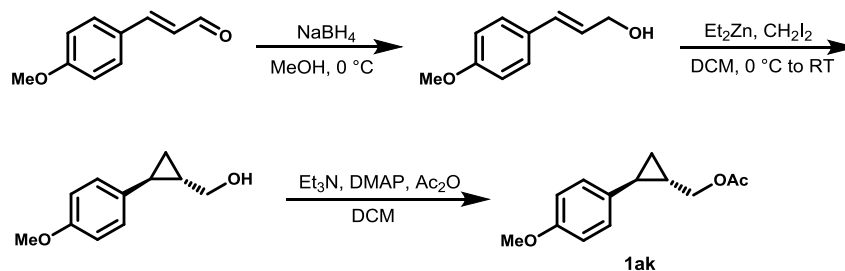

a) To a solution of (*E*)-3-(4-methoxyphenyl)acrylaldehyde (1.62 g, 10.0 mmol, 1.0 equiv) in MeOH (30 mL, 0.33 M) at 0 °C was added NaBH<sub>4</sub> (454 mg, 12 mmol, 1.2 equiv) and the reaction mixture was stirred at the same temperature for 2 h. The reaction mixture was then quenched with sat. aq. NH<sub>4</sub>Cl (20 mL) and extracted with DCM (50 mL × 3). The combined organic layers were washed with brine (20 mL), dried over

Na<sub>2</sub>SO<sub>4</sub>(20 g) , filtered and concentrated under reduced pressure. The residue was purified by column chromatography (PE : EtOAc = 4 : 1 to 2 : 1) to provide (*E*)-3-(4-methoxyphenyl)prop-2-en-1-ol 1410 mg (8.60 mmol).

b) To a 50 mL oven-dried round-bottom flask equipped with a stir bar was added the solution of CH<sub>2</sub>I<sub>2</sub> (510 μL, 6.4 mmol, 2.0 equiv) in DCM (20 mL) under nitrogen atmosphere. The flask was cooled to 0 °C. Next, ZnEt<sub>2</sub> (2.0 M, 2.1 mL, 4.2 mmol, 1.3 equiv) was added by syringe and the reaction was stirred at this temperature for 30 min. At the same time, to separate 50 mL oven-dried round-bottom flask was added a solution of (*E*)-3-(4-methoxyphenyl)prop-2-en-1-ol (520 mg, 3.2 mmol, 1.0 equiv) in DCM (10 mL) under a nitrogen atmosphere at 0 °C. Next, ZnEt<sub>2</sub> (2.0 M, 2.1 mL, 4.2 mmol, 1.3 equiv) was added dropwise by syringe over 10 min and then stirred at 0 °C for 30 min. The resultant solution was added to the first flask by syringe and the resulting reaction mixture was stirred at 0 °C for another 30 min. The reaction mixture was then allowed to warm to room temperature and stirred for 24 h. After the reaction reached completion according to the TLC analysis, the reaction mixture was quenched with sat. NH<sub>4</sub>Cl (10mL) and extracted with DCM (30 mL) for 3 times. The combined organic layers were washed with sat. NaHCO<sub>3</sub> (20 mL) and brine (20 mL), dried over Na<sub>2</sub>SO<sub>4</sub> (20 g) and filtered. After the volatile materials were removed under reduced pressure, the crude residue was purified by column chromatography (PE : EtOAc = 4 : 1 to 2 : 1) to afford (2-(4-methoxyphenyl)cyclopropyl)methanol 490 mg (2.75 mmol, 86%) and its NMR spectra match the literature data.<sup>7</sup>

c) (2-(4-Methoxyphenyl)cyclopropyl)methanol (140 mg, 0.786 mmol, 1.0 equiv) was dissolved in DCM (3.0 mL) followed by addition of DMAP (12 mg, 0.08 equiv), TEA (150 μL, 1.9 mmol, 2.4 equiv) and Ac<sub>2</sub>O (80 μL, 1.57 mmol, 2.0 equiv) at room temperature. The reaction mixture was stirred at room temperature for 16 h. After reached completion according to the TLC analysis, the reaction mixture was quenched with sat. NH<sub>4</sub>Cl (10mL) and extracted with DCM (20 mL) for 3 times. The combined organic layers were washed with sat. NaHCO<sub>3</sub> (20 mL) and brine (20 mL), dried over Na<sub>2</sub>SO<sub>4</sub> (20 g) and filtered. After the volatile materials were removed under reduced

pressure, the crude residue was purified by column chromatography (PE : EtOAc = 10 : 1 to 4 : 1) to give compound **1ak** (132 mg, 0.60 mmol, 76% yield) as a colorless liquid and its NMR spectra match the literature data.

### Synthetic Procedure for **1ab**

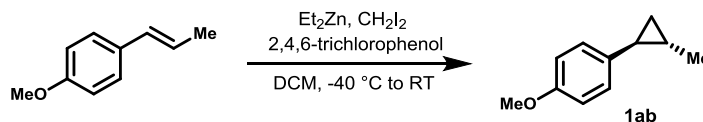

Compound **1ab** was prepared from (*E*)-1-methoxy-4-(prop-1-en-1-yl)benzene following the cyclopropanation method in General Procedure A and obtained in 73% yield as a colorless liquid.

### Synthetic Procedure for **1aa**

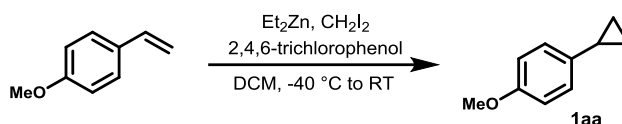

The compound **1aa** was prepared from 1-methoxy-4-vinylbenzene following the cyclopropanation method in General Procedure A and obtained in 77% yield as a colorless liquid.

### Synthetic Procedure for **1v**

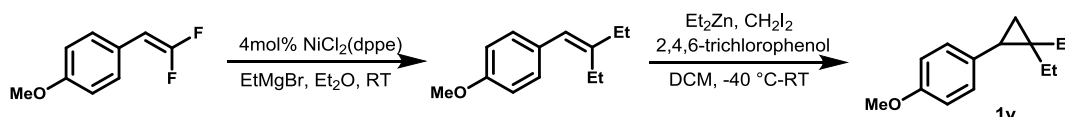

a) To an oven-dried 50 mL round-bottom flask equipped with a stir bar, 1-(2,2-difluorovinyl)-4-methoxybenzene (340 mg, 2.0 mmol, 1.0 equiv),  $\text{NiCl}_2(\text{dppe})$  (42 mg, 4 mol%) and  $\text{Et}_2\text{O}$  (15 mL) was added under nitrogen atmosphere at room temperature. To this stirring solution at room temperature,  $\text{EtMgBr}$  (1.0 M in THF, 4.8 mL, 4.8 mmol, 2.4 equiv) was added slowly by syringe and the resulting mixture was stirred for an additional 2 h. Once the reaction was judged to be complete by TLC analysis, the reaction mixture was quenched with sat.  $\text{NH}_4\text{Cl}$  (20 mL) and extracted with EtOAc (30 mL) for 3 times. The combined organic layers were washed with sat.  $\text{NaHCO}_3$  (30 mL) and brine (20 mL), dried over  $\text{Na}_2\text{SO}_4$  (20 g) and filtered. After the volatile materials

were removed under reduced pressure, the crude residue was purified by column chromatography (PE : EtOAc = 50 : 1 to 10 : 1) to afford 1-(2-ethylbut-1-en-1-yl)-4-methoxybenzene as colorless oil (294 mg, 1.54 mmol, yield 77%).

b) Compound **1v** was prepared from 1-(2-ethylbut-1-en-1-yl)-4-methoxybenzene following the cyclopropanation method in General Procedure A and purified by column chromatography (PE : EtOAc = 50 : 1 to 10 : 1) and was obtained in 67% yield as a colorless liquid.

### Synthetic Procedure for **1x**

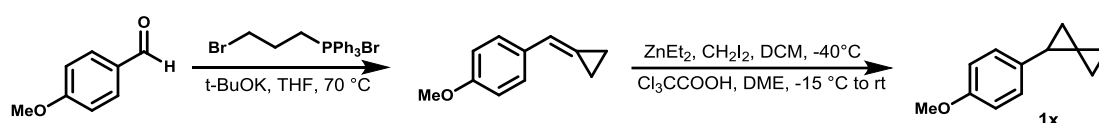

a) To a 150 mL oven-dried round-bottom flask equipped with a stir bar was added bromo(3-bromopropyl)triphenylphosphorane (7.0 g, 15.0 mmol, 1.2 equiv) and anhydrous THF (30 mL, 0.5 M) under a nitrogen atmosphere at room temperature. After a solution of *t*-BuOK (3.4 g, 30 mmol, 3.0 equiv) in THF (25 mL) was added by syringe and the resulting reaction mixture was then heated to 70 °C and stirred at 70 °C for 1 h. Next, 4-methoxybenzaldehyde (1.36 g, 10.0 mmol, 1.0 equiv) was added by syringe and the reaction mixture was stirred at 70 °C for an additional 3 h. After the reaction reached completion according to the TLC analysis, the reaction was cooled down to room temperature and quenched with sat.NH<sub>4</sub>Cl (50 mL), extracted with EtOAc (50 mL) for 3 times. The combined organic layers were washed with H<sub>2</sub>O (50 mL) and brine (20 mL), dried over Na<sub>2</sub>SO<sub>4</sub> (20 g) and filtered. After the volatile materials were removed under reduced pressure the crude residue was purified by column chromatography (PE : EtOAc = 50 : 1 to 10 : 1) to afford 1-(cyclopropylidene)methyl-4-methoxybenzene as colorless oil (244 mg, 1.52 mmol, 15% yield).

b) Compound **1x** was prepared from 1-(cyclopropylidene)methyl-4-methoxybenzene following the General Procedure B, purified by column chromatography (PE : EtOAc = 50 : 1 to 10 : 1) and was obtained in 77% yield as a colorless liquid.

## Synthetic Procedure for **1z**<sup>9</sup>

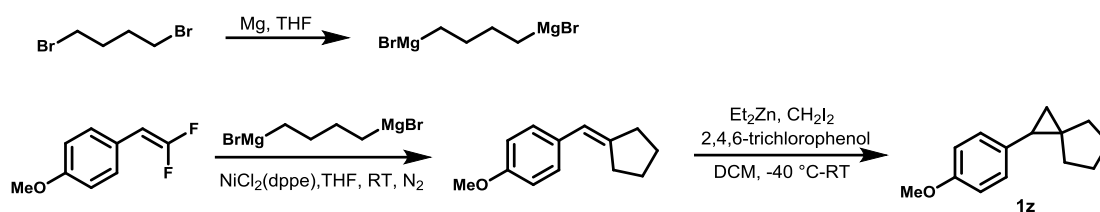

a) To an oven-dried 100 mL 3-necked round-bottom flask equipped with a stir bar, magnesium turnings (2.7 g, 110 mmol, 2.2 equiv) were added followed by anhydrous THF (15 mL) under nitrogen atmosphere. Then a solution of 1,4-dibromobutane (10.75 g, 50.0 mmol, 1.0 equiv) in anhydrous THF (5 mL) was added dropwise by syringe at room temperature and the reaction mixture was further stirred at room temperature for 2 h to give the Grignard reagent (1.0 M). To a separate 50 mL oven-dried 3-necked round-bottom flask equipped with a stir bar, was added 1-(2,2-difluorovinyl)-4-methoxybenzene (340 mg, 2.0 mmol, 1.0 equiv),  $\text{NiCl}_2(\text{dppe})$  (43 mg, 4 mol%) and THF (10 mL) under nitrogen atmosphere. Then the freshly prepared Grignard reagent (1.0 M, 2.0 mL, 2.0 mmol, 1.0 equiv) was added by syringe and the reaction mixture was stirred at RT for 1 h. After the reaction reached completion according to the TLC analysis, the reaction mixture was quenched with sat.  $\text{NH}_4\text{Cl}$  (20 mL) and extracted with EtOAc (50 mL) for 3 times. The combined organic layers were washed with  $\text{H}_2\text{O}$  (50 mL) and brine (20 mL), dried over  $\text{Na}_2\text{SO}_4$  (20 g) and filtered. After the volatile materials were removed under reduced pressure, the crude residue was purified by column chromatography (PE : EtOAc = 50 : 1 to 10 : 1) to afford the 1-(cyclopentylidene)-4-methoxybenzene as colorless oil (155 mg, 0.82 mmol, yield 41%).

b) Compound **1z** was prepared from 1-(cyclopentylidene)-4-methoxybenzene following the cyclopropanation method in General Procedure A, purified by column chromatography (PE : EtOAc = 50 : 1 to 10 : 1) and was obtained in 71% yield as a colorless liquid.

### Synthetic Procedure for 1aa

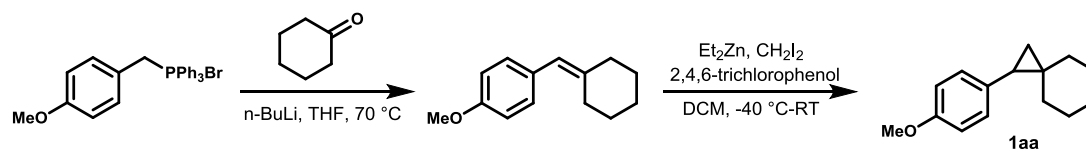

To an oven-dried 50 mL round-bottom flask with a stir bar, (4-methoxybenzyl) tris(phenyl) phosphonium bromide (2.0 g, 4.3 mmol, 1.0 equiv) was added followed by anhydrous THF (10 mL, 0.4 M) under nitrogen atmosphere at room temperature. Next, *n*-BuLi (2.5 M in THF solvent, 2.1 mL, 5.2 mmol, 1.2 equiv) was added by syringe and the reaction mixture was stirred at room temperature for 1 h. To the reaction mixture, cyclohexanone (510 mg, 5.20 mmol, 1.2 equiv) was added by syringe and the reaction mixture was stirred under reflux for 4 h. After the reaction reached completion according to the TLC analysis, the reaction mixture was cooled down to room temperature, quenched with sat.  $\text{NH}_4\text{Cl}$  (10 mL) with and extracted with EtOAc (50 mL) for 3 times. The combined organic layers were washed with  $\text{H}_2\text{O}_2$  (10 wt% in water, 10 mL) and brine (20 mL), dried over  $\text{Na}_2\text{SO}_4$  (20 g) and filtered. After the volatile materials were removed under reduced pressure, the crude residue was purified by column chromatography (PE : EtOAc = 50 : 1 to 10 : 1) to afford the 1-(cyclohexylidene)methyl-4-methoxybenzene as colorless oil (500 mg, 2.47 mmol, yield 57.3%).

Compound **1aa** was prepared from 1-(cyclohexylidene)methyl-4-methoxybenzene by following the cyclopropanation method in General Procedure A, purified by column chromatography (PE : EtOAc = 50 : 1 to 10 : 1) and was obtained in 71% yield as a colorless liquid.

### Synthetic Procedure for 1w

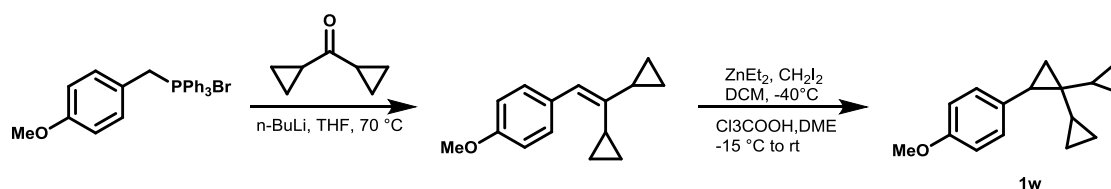

To an oven-dried 50 mL round-bottom flask with a stir bar, (4-methoxybenzyl) tris(phenyl) phosphonium bromide (1.0 g, 2.15 mmol, 1.0 equiv) was added followed by



anhydrous THF (5 mL, 0.4 M) under nitrogen atmosphere at room temperature. Next, *n*-BuLi (2.5 M in THF solvent, 1.1 mL, 2.75 mmol, 1.2 equiv) was added by syringe and the reaction mixture was stirred at room temperature for 1 h. To the reaction mixture, dicyclopropylmethanone (260 mg, 2.36 mmol, 1.1 equiv) was added by syringe and the reaction mixture was stirred under reflux for 4 h. After the reaction reached completion according to the TLC analysis, the reaction mixture was cooled down to room temperature, quenched with sat.NH<sub>4</sub>Cl (10 mL) and extracted with EtOAc (50 mL) for 3 times. The combined organic layers were washed with H<sub>2</sub>O<sub>2</sub> (10 wt% in water, 10 mL) and brine (20 mL), dried over Na<sub>2</sub>SO<sub>4</sub> (20 g) and filtered. After the volatile materials were removed under reduced pressure, the crude residue was purified by column chromatography (PE : EtOAc = 50 : 1 to 10 : 1) to afford the 1-(2,2-dicyclopropylvinyl)-4-methoxybenzene as a yellow oil (310 mg, 1.44 mmol, yield 67.3%).

Compound **1w** was prepared from 1-(2,2-dicyclopropylvinyl)-4-methoxybenzene following the General Procedure B, purified by column chromatography (PE : EtOAc = 50 : 1 to 10 : 1) and was obtained in 27% yield as a colorless liquid.

### Synthetic Procedure for **1ai** and **1aj**

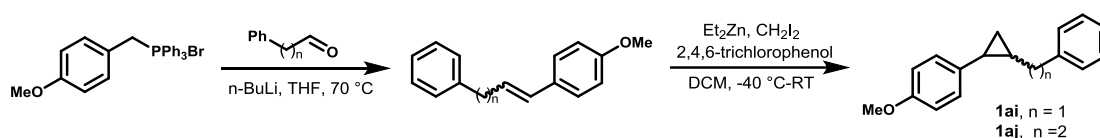

To an oven-dried 50 mL round-bottom flask with a stir bar, (4-methoxybenzyl) tris(phenyl) phosphonium bromide (1.0 g, 2.15 mmol, 1.0 equiv) was added followed by anhydrous THF (5 mL, 0.4 M) under nitrogen atmosphere at room temperature. Next, *n*-BuLi (2.5 M in THF solvent, 1.1 mL, 2.75 mmol, 1.2 equiv) was added by syringe and the reaction mixture was stirred at room temperature for 1 h. To the reaction mixture, 2-phenylacetaldehyde (280 mg, 2.36 mmol, 1.1 equiv) was added by syringe and the reaction mixture was stirred under reflux for 4 h. After the reaction reached completion according to the TLC analysis, the reaction mixture was cooled down to room temperature, quenched with sat.NH<sub>4</sub>Cl (10 mL) and extracted with EtOAc (50 mL) for 3 times. The combined organic layers were washed with H<sub>2</sub>O<sub>2</sub> (10 wt% in water, 10

mL) and brine (20 mL), dried over Na<sub>2</sub>SO<sub>4</sub> (20 g) and filtered. After the volatile materials were removed under reduced pressure, the crude residue was purified by column chromatography (PE : EtOAc = 50 : 1 to 10 : 1) to afford 1-methoxy-4-(3-phenylprop-1-en-1-yl)benzene as a yellow oil (*E*- and *Z*-isomer mixture as one spot on TLC, 292 mg, 1.30 mmol, yield 60.5%).

1-methoxy-4-(4-phenylbut-1-en-1-yl)benzene was obtained from 3-phenylpropanal by the same reaction and was purified by column chromatography (PE : EtOAc = 50 : 1 to 10 : 1) to afford a yellow oil in 55% yield (*E*- and *Z*-isomer mixture).

Compounds **1ai** was prepared from 1-methoxy-4-(3-phenylprop-1-en-1-yl)benzene by following the cyclopropanation method in General Procedure A, purified by column chromatography (PE : EtOAc = 50 : 1 to 10 : 1) and was obtained in overall yields of 23% as a colorless oil (*Trans* : *Cis* = 1.2 : 1.0 mixture as one spot on TLC).

Compounds **1aj** was prepared from 1-methoxy-4-(4-phenylbut-1-en-1-yl)benzene by following the cyclopropanation method in General Procedure A, purified by column chromatography (PE : EtOAc = 50 : 1 to 10 : 1) and was obtained in overall yields of 31% as a yellow oil (*Trans* : *Cis* = 1.0 : 0.75 mixture as one spot on TLC).

### Synthetic Procedure for **1am**<sup>10</sup>

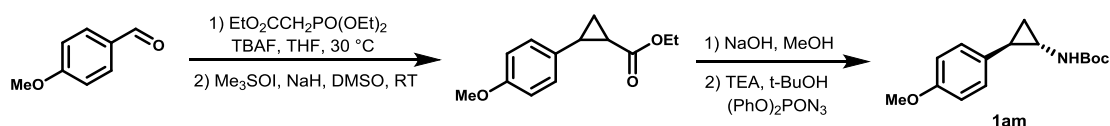

Compound **1am** was prepared according to the literature procedure<sup>10</sup> and obtained with an overall yield of 39% as a white solid.

### Synthetic Procedure for **1ad-1af**

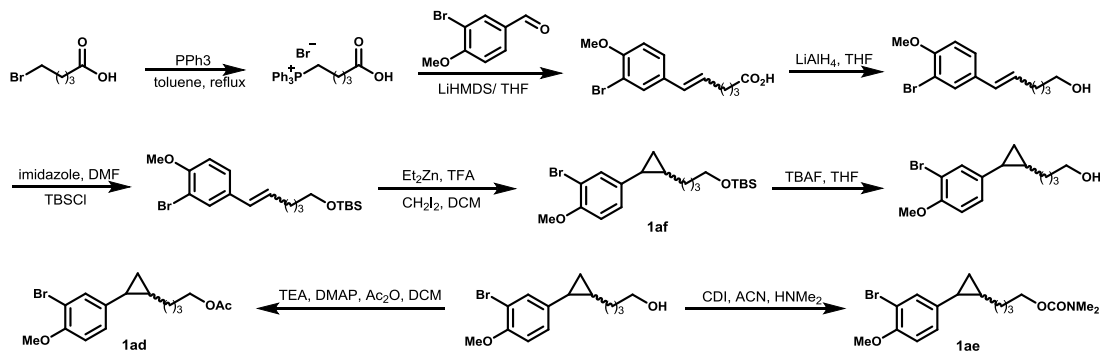

a) To an oven-dried 150 mL round-bottom flask equipped with a stir bar, (4-

carboxybutyl)triphenylphosphonium bromide (5.32 g, 12 mmol, 1.2 equiv) was added followed by anhydrous THF (25 mL) under a nitrogen atmosphere at 0 °C. Then LiHMDS (1.0 M, 24 mL, 24 mmol, 2.4 equiv) was added dropwise by syringe and the reaction mixture was stirred at 0 °C for 1 h. A solution of 3-bromo-4-methoxybenzaldehyde (2.15 g, 10 mmol, 1.0 equiv) in THF (6.0 mL) was added by syringe and the reaction mixture was stirred at rt for 16 h. After the reaction was completed according to the TLC analysis, the reaction mixture was quenched with sat.NH<sub>4</sub>Cl (50 mL) and extracted with EtOAc (50 mL) for 3 times. The combined organic layers were washed with H<sub>2</sub>O (50 mL) and brine (20 mL), dried over Na<sub>2</sub>SO<sub>4</sub> (20 g) and filtered. After removal of the volatile materials under reduced pressure, the crude residue was purified by column chromatography (PE : EtOAc = 10 : 1 to 3 : 1) to afford the 6-(3-bromo-4-methoxyphenyl)hex-5-enoic acid as a white solid 2.37g, (7.9 mmol, 79%).

b) To an oven-dried 500 mL round-bottom flask equipped with a stir bar, 6-(3-bromo-4-methoxyphenyl)hex-5-enoic acid (3.0 g, 10 mmol, 1.0 equiv) was added followed by anhydrous THF (100 mL) under a nitrogen atmosphere at 0 °C. Then LiAlH<sub>4</sub> (380 mg, 10 mmol, 1.0 equiv) was added portionwise and the reaction mixture was stirred at 0 °C for 1 h. After the reaction was completed according to the TLC analysis, the reaction mixture was quenched with H<sub>2</sub>O (380 μL) followed by the addition of aq. NaOH (15%, 380 μL) and H<sub>2</sub>O (1.14 mL). The mixture was filtered and the filtrate was extracted with EtOAc. The combined organic layers were washed with H<sub>2</sub>O (50 mL) and brine (20 mL), dried over Na<sub>2</sub>SO<sub>4</sub> (20 g) and filtered. After volatile materials were removed under reduced pressure, the crude residue was purified by column chromatography (PE : EtOAc = 10 : 1 to 3 : 1) to afford the 6-(3-bromo-4-methoxyphenyl)hex-5-en-1-ol as a colorless oil 2.0g, (7.0 mmol, 70%).

c) To an oven-dried 50 mL round-bottom flask equipped with a stir bar, 6-(3-bromo-4-methoxyphenyl)hex-5-en-1-ol (670 mg, 2.4 mmol, 1.0 equiv) was added followed by DMF (5 mL) under a nitrogen at 0 °C. Then imidazole (180 mg, 2.64 mmol, 1.1 equiv) was added followed by TBSCl (400 mg, 2.64 mmol, 1.1 equiv). The mixture was stirred

at room temperature for 2 h. After the reaction was completed according to the TLC analysis, the reaction mixture was quenched with H<sub>2</sub>O (380  $\mu$ L) and extracted with EtOAc. The combined organic layers were washed with sat. NH<sub>4</sub>Cl (30 mL), H<sub>2</sub>O (30 mL), and brine (20 mL) then dried over Na<sub>2</sub>SO<sub>4</sub> (10 g) and filtered. After the volatile materials were removed under reduced pressure, the crude residue was purified by column chromatography (PE : EtOAc = 10 : 1 to 5 : 1) to afford ((6-(3-bromo-4-methoxyphenyl)hex-5-en-1-yl)oxy)(tert-butyl)dimethylsilane as a colorless oil 650 mg, (1.75 mmol, 73%).

d) **1af** was prepared from ((6-(3-bromo-4-methoxyphenyl)hex-5-en-1-yl)oxy) (tert-butyl)dimethylsilane (3.0 mmol) by following the General Procedure C purified by column chromatography (PE : EtOAc = 10 : 1 to 5 : 1), and was obtained in 73% yield (2.2 mmol) as a white solid.

e) **1af** (1.0 mmol) was added into a solution of TBAF (1.0 M in THF, 4.0 equiv) and the mixture was stirred at RT for 16 h. After the completion of reaction as judged by TLC analysis, the solution was concentrated under reduced pressure and further diluted with EtOAc. The combined organic layers were washed with H<sub>2</sub>O and brine, dried over Na<sub>2</sub>SO<sub>4</sub> and filtered. After removing volatile materials under reduced pressure, the crude product 4-(2-(3-bromo-4-methoxyphenyl) cyclopropyl)butan-1-ol was directly used without further purification.

f) **1ad** was prepared from 4-(2-(3-bromo-4-methoxyphenyl)cyclopropyl)butan-1-ol by following the acylation procedure for **1aj** synthesis and obtained (0.76 mmol) in 76% yield as a white solid.

g) To an oven-dried 50 mL round-bottom flask with a stir bar, 4-(2-(3-bromo-4-methoxyphenyl)cyclopropyl)butan-1-ol (120 mg, 0.4 mmol, 1.0 equiv) was added followed by MeCN (1 mL) under a nitrogen atmosphere at 0 °C. Then CDI (1,1'-carbonyldiimidazole) (100 mg, 0.6 mmol, 1.5 equiv) was added and the mixture was stirred at rt for 1 h. After the reaction was completed according to the TLC analysis, HNMe<sub>2</sub> (2.0 M in THF, 0.5 mL, 2.5 equiv) was added and the mixture was stirred at rt for 16 h. After the reaction was completed according to the TLC analysis, the reaction

mixture was quenched with H<sub>2</sub>O (380 μL) and extracted with EtOAc (20 mL) for 3 times. The combined organic layers were washed with sat. NH<sub>4</sub>Cl, H<sub>2</sub>O and brine then dried over Na<sub>2</sub>SO<sub>4</sub> and filtered. After removal of the volatile materials under reduced pressure, the crude residue was purified by column chromatography (PE : EtOAc = 10 : 1 to 5 : 1) to afford **1ae** in 74% yield as a white solid.

### Synthetic Procedure for **1al**

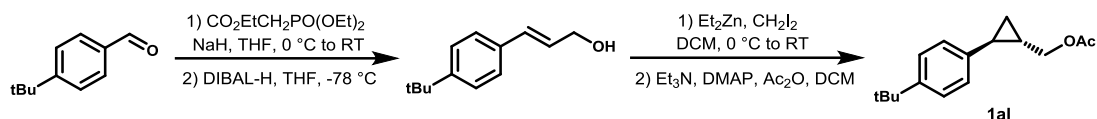

**1al** (390 mg, 1.59 mmol) was prepared from (E)-3-(4-(tert-butyl)phenyl)prop-2-en-1-ol<sup>11</sup> (840 mg, 4.42 mmol) by following the cyclopropanation and acylation procedures for **1ak** synthesis and obtained in an overall yield of 36% as a colorless liquid.

### Synthetic Procedure for **1r** and **1s**

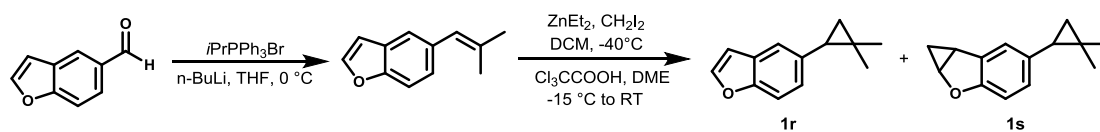

5-(2-Methylprop-1-en-1-yl)benzofuran (228 mg, 1.32 mmol) was subjected to General Procedure B with slight modifications by using Et<sub>2</sub>Zn (2.0M, 2.0 mL, 4.0 mmol, 3.0 equiv), CH<sub>2</sub>I<sub>2</sub> (2.15 g, 8.0 mmol, 6.0 equiv), Cl<sub>3</sub>CCOOH (60 mg, 0.4 mmol, 0.3 equiv) and DME (180 mg, 2.0 mmol, 1.5 equiv). After work up, the residue of the reaction was purified by column chromatography (PE : EtOAc = 50 : 1 to 20 : 1) to afford **1r** (PE : EtOAc = 50 : 1, R<sub>f</sub> = 0.6) 82 mg, 0.44mmol, 33% and **1s** (PE : EtOAc = 50 : 1, R<sub>f</sub> = 0.4) 74 mg, 0.37mmol, 28% as colorless liquids, respectively.

### Synthetic Procedure for **1i**

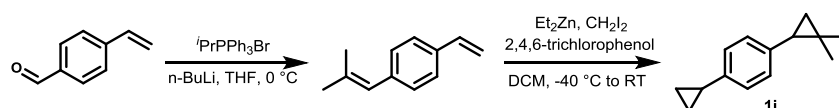

Following the General Procedure A but doubling the stoichiometries of respective reagents employed: 2,4,6-trichlorophenol (1.95 g, 10.0 mmol, 5.0 equiv ); ZnEt<sub>2</sub> (2.0 M, 5.0 mL, 10.0 mmol, 5.0 equiv); CH<sub>2</sub>I<sub>2</sub> (4.2 g, 12.8 mmol, 8.0 equiv), from 1-(2-



temperature then the reaction solution was cooled to 0 °C. Next, LiHMDS (1.0 M in THF solvent, 13.0 mL, 13.0 mmol, 1.3 equiv) was added by syringe and the reaction mixture was stirred at 0 °C for 30 min. To the reaction mixture, 4-methoxybenzaldehyde (1.36 g, 10.0 mmol, 1.0 equiv) in THF (10 mL) solution was added by syringe and the reaction mixture was stirred at room temperature for 16 h. After the reaction reached completion according to the TLC analysis, the reaction mixture was quenched with sat.NH<sub>4</sub>Cl (10 mL) and extracted with EtOAc (50 mL) for 3 times. The combined organic layers were washed with H<sub>2</sub>O<sub>2</sub> (10 wt% in water, 10 mL) and brine (20 mL), dried over Na<sub>2</sub>SO<sub>4</sub> (20 g) and filtered. After the volatile materials were removed under reduced pressure, the crude residue was purified by column chromatography (PE : EtOAc = 50 : 1 to 10 : 1) to afford the 1-methoxy-4-(2-methoxyvinyl)benzene as a yellow oil (1.19 g, 7.25 mmol, yield 72.5%).

b) To an oven-dried 50 mL round-bottom flask with a stir bar, AcOH (10 mL) was warmed 80 °C, then AgAcO (10 mg) was added with stirring soon it became a clear solution. Then Zn powder (2.0 g) was added into the solution and stirred at 80 °C for 30 seconds. The resultant mixture was cooled down to room temperature and then solvent was decanted, the residue solids were washed with ether (10 mL) for 5 times. To the residue solids was added 1-methoxy-4-(2-methoxyvinyl)benzene (820 mg, 5.0 mmol, 1.0 equiv) followed by anhydrous ether (10 mL) under nitrogen atmosphere at room temperature, then CH<sub>2</sub>I<sub>2</sub> (2.0 g, 7.5 mmole, 1.5 equiv) was dropped into with stirring and then the reaction solution was stirred under reflux for 16 h. After the reaction reached completion according to the TLC analysis, the reaction mixture was quenched with sat.NH<sub>4</sub>Cl (10 mL) and extracted with EtOAc (50 mL) for 3 times. The combined organic layers were washed with H<sub>2</sub>O (50 mL) and brine (20 mL), dried over Na<sub>2</sub>SO<sub>4</sub> (20 g) and filtered. After the volatile materials were removed under reduced pressure, the crude residue was purified by column chromatography (PE : EtOAc = 50 : 1 to 10 : 1) to afford the **1an** as a colorless oil (580 mg, 3.25 mmol, yield 65.0%, D,R = 1: 0.8).

## Synthesis of (1R,2R)-1,2-diphenylcyclopropane

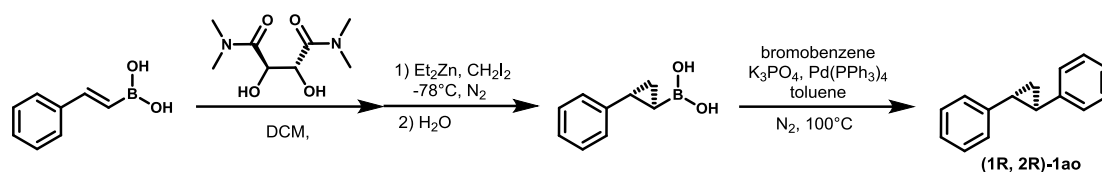

a) To an oven-dried 100 mL round-bottom flask equipped with a stir bar, (E)-styrylboronic acid (0.75 g, 5 mmol, 1.0 equiv), +TMTA (1.05 g, 5 mmol, 1.0equiv) and dry DCM (20 mL) was added at room temperature. The reaction mixture was stirred for 2h and then cooled to  $-78^\circ\text{C}$ . In a separate 100 mL flask,  $\text{Et}_2\text{Zn}$  (1.0M, 15 mL, 15 mmol, 3.0 equiv) was dissolved in DCM (20 mL), cooled to  $-78^\circ\text{C}$  and treated dropwise with  $\text{CH}_2\text{I}_2$  (1.0 ml, 12 mmol, 4.8 equiv), then stirred vigorously for 10 min to generate the carbenoid (ineffective stirring due to precipitation of zinc salt or  $\text{CH}_2\text{I}_2$  did not affect the reaction). The pre-chilled  $-78^\circ\text{C}$  solution was then quickly added *via* syringe over 2 min. The mixture was stirred at  $-78^\circ\text{C}$  for 8 h. 20 mL of saturated aqueous  $\text{NH}_4\text{Cl}$  solution was carefully added to quench the reaction. After addition of  $\text{NH}_4\text{Cl}$ , the mixture was stirred at  $-78^\circ\text{C}$  for 5 min, taken out of the cooling bath and warmed to ambient temperature. After phase separation, 1M  $\text{HCl}$  was added just to dissolve precipitate in the aqueous phase (pH was 5-6 at this point). The aqueous phase was extracted with 50 mL of DCM three times. The combined organic phases were dried with  $\text{MgSO}_4$ , filtered and concentrated and pumped to afford crude ((1R,2R)-2-phenylcyclopropyl)boronic acid (directly used for the next step).

b) To an oven-dried 50 mL round-bottom flask equipped with a stir bar, crude ((1R,2R)-2-phenylcyclopropyl)boronic acid, bromobenzene (720 mg, 4.5 mmol, 0.9 equiv),  $\text{K}_3\text{PO}_4$  (3.2 g, 15 mmol, 3.3 equiv),  $\text{Pd}(\text{PPh}_3)_4$  (156 mg, 0.03 quiv) and toluene (20 mL) was added under nitrogen atmosphere. The reaction mixture was stirred at  $100^\circ\text{C}$  for 16 h. Once the reaction was judged to be complete by TLC analysis, the reaction mixture was filtered to remove the solids and the volatile materials of the reaction mixture were removed under reduced pressure, the crude residue was purified by column chromatography (PE 100%) to (1S,2S)-1,2-diphenylcyclopropane as a colorless oil (306 mg, 1.57 mmol, overall yield 35%, ee 90%). See Fig S3.



### Synthetic procedure for 2e<sup>14</sup>

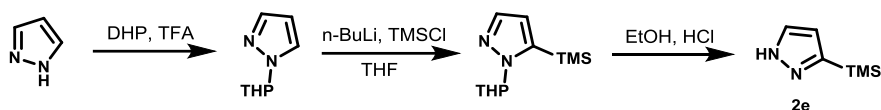

Compound **2e** was prepared according to the literature<sup>14</sup> with an overall yield of 68% as a white solid.

### Reaction Optimization

#### Supplementary Table 1: Photocatalyst screening<sup>a</sup>

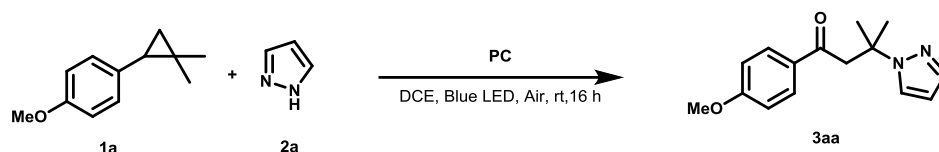

| Entry           | PC      | Yield of 3aa (%) | Conversion (%) |
|-----------------|---------|------------------|----------------|
| 1               | PC-I    | 64               | 100            |
| 2               | PC-II   | NDP              | 100            |
| 3               | PC-III  | 68               | 100            |
| 4               | PC-IV   | 65               | 100            |
| 5               | PC-V    | 47               | 70             |
| 6               | PC-VI   | 57               | 100            |
| 7               | PC-VII  | trace            | 10             |
| 8               | PC-VIII | trace            | 10             |
| 9               | PC-IX   | NDP              | 10             |
| 10              | PC-X    | trace            | 10             |
| 11              | PC-XI   | trace            | 10             |
| 12              | PC--XII | NR               | 0              |
| 13              | PC-XIII | NDP              | 100            |
| 14              | PC-XIV  | NDP              | 60             |
| 15              | PC-XV   | NDP              | 50             |
| 16 <sup>b</sup> | PC-III  | NR               | 0              |
| 17 <sup>c</sup> | -       | NR               | 0              |

<sup>a</sup> Experiments were performed with **1a** (0.1 mmol), **2a** (0.3 mmol), photocatalyst (2 mol%) in DCE (0.5 mL), irradiating with 15 W blue LEDs under air atmosphere at room temperature for 16 h. Yield

and conversion were determined by  $^1\text{H}$  NMR using 1,1,2,2-tetrachloroethane as internal standard.

NR, no reaction. NDP, no desired product. <sup>b</sup> Without irradiation. <sup>c</sup> Without photocatalyst.

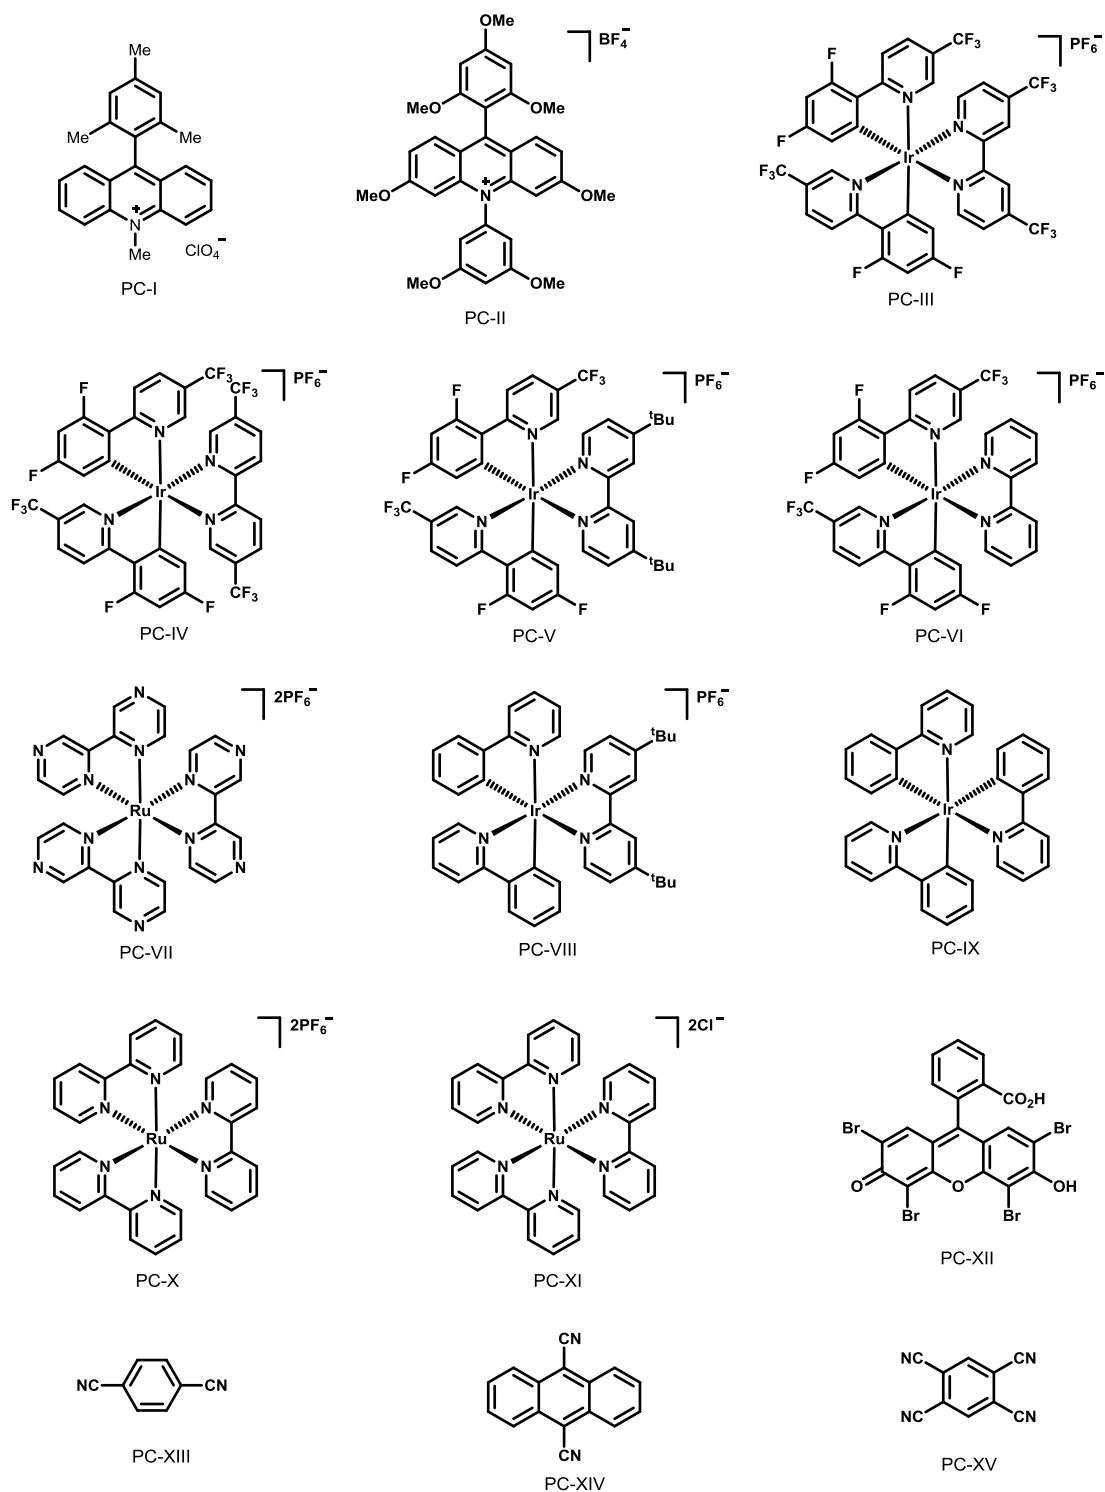

Supplementary Table 2: Solvent screening<sup>a</sup>

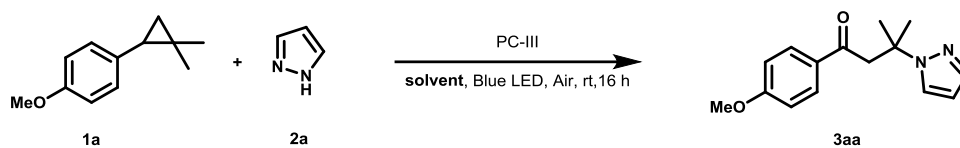

| Entry | Solvent           | Yield of 3aa(%) | Conversion(%) |
|-------|-------------------|-----------------|---------------|
| 1     | DCE               | 70              | 100           |
| 2     | DME               | 38              | 60            |
| 3     | MeCN              | 53              | 65            |
| 4     | DMF               | 0               | 100           |
| 5     | DCM               | 66              | 100           |
| 6     | MeOH              | 0               | 100           |
| 7     | Chloroform        | 33              | 55            |
| 8     | NMP               | NR              | 0             |
| 9     | MTBE              | 11              | 30            |
| 10    | Et <sub>2</sub> O | 68              | 100           |
| 11    | THF               | 16              | 40            |
| 12    | DMAC              | NR              | 0             |
| 13    | 1,4-dioxane       | 45              | 100           |
| 14    | cyclohexane       | trace           | 5             |
| 15    | n-hexane          | trace           | 5             |
| 16    | toluene           | 0               | 100           |
| 17    | MeNO <sub>2</sub> | 22              | 100           |

<sup>a</sup> Experiments were performed with **1a** (0.1 mmol), **2a** (0.2 mmol), photocatalyst (2 mol %) in solvent (0.5 mL), irradiating with 15 W blue LEDs under air atmosphere at room temperature for 16 h. Yield and conversion were determined by <sup>1</sup>H-NMR using 1,1,2,2-tetrachloroethane as internal standard.

**Supplementary Table 3: Light source screening<sup>a</sup>**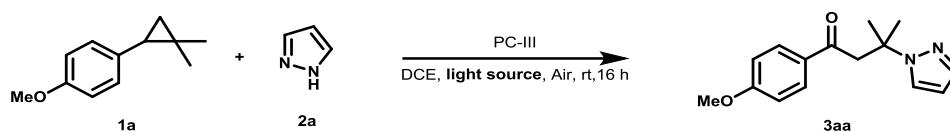

| Entry    | Light source     | Yield of <b>3a</b> (%) | Conversion(%) |
|----------|------------------|------------------------|---------------|
| <b>1</b> | <b>Blue-LEDs</b> | <b>65</b>              | <b>100</b>    |
| 2        | Purple-LEDs      | 51                     | 100           |
| 3        | white            | 35                     | 55            |
| 4        | black            | NR                     | 0             |

<sup>a</sup> Experiments were performed with **1a** (0.1 mmol), **2a** (0.2 mmol), photocatalyst (2 mol %) in DCE (0.5 mL), irradiating with or without light source under air atmosphere at room temperature for 16 h. Yield and conversion were determined by <sup>1</sup>H-NMR using 1,1,2,2-tetrachloroethane as internal standard. NR, no reaction.

**Supplementary Table 4: Screening of equivalents of pyrazole<sup>a</sup>**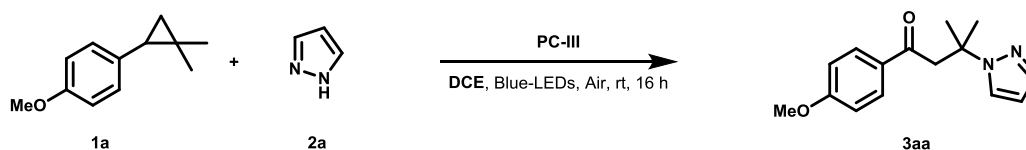

| Entry    | Equivalents of <b>2a</b> | Yield of <b>3a</b> (%) | Conversion(%) |
|----------|--------------------------|------------------------|---------------|
| 1        | 1.0                      | 53                     | 70            |
| <b>2</b> | <b>2.0</b>               | <b>65</b>              | <b>100</b>    |
| 3        | 4.0                      | 66                     | 100           |

<sup>a</sup> Experiments were performed with **1a** (0.1 mmol), **2a**, 4Å MS (50 mg), photocatalyst (2 mol%) in DCE (0.5 mL), irradiating with blue-LEDs under air atmosphere at room temperature for 16 h. Yield and conversion were determined by <sup>1</sup>H-NMR using 1,1,2,2-tetrachloroethane as internal standard.

**Supplementary Table 5: Screening of reaction atmosphere<sup>a</sup>**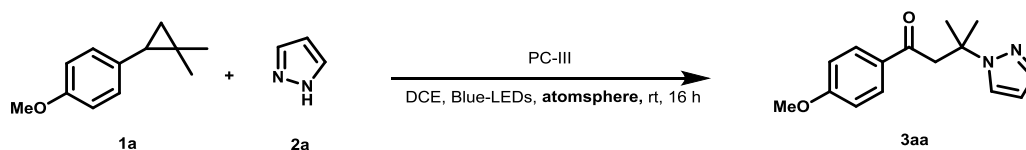

| Entry | Atmosphere | Yield of <b>3aa</b> (%) | Conversion(%) |
|-------|------------|-------------------------|---------------|
|-------|------------|-------------------------|---------------|

|   |                |    |     |
|---|----------------|----|-----|
| 1 | N <sub>2</sub> | 0  | 0   |
| 2 | air            | 65 | 100 |
| 3 | O <sub>2</sub> | 74 | 100 |

<sup>a</sup> Experiments were performed with **1a** (0.1 mmol), **2a** (0.2 mmol), photocatalyst (2 mol%) in DCE (0.5 mL), irradiating with Blue-LEDs under atmosphere at room temperature for 16 h. Yield and conversion were determined by <sup>1</sup>H-NMR using 1,1,2,2-tetrachloroethane as internal standard.

**Supplementary Table 6: Screening of additives<sup>a</sup>**

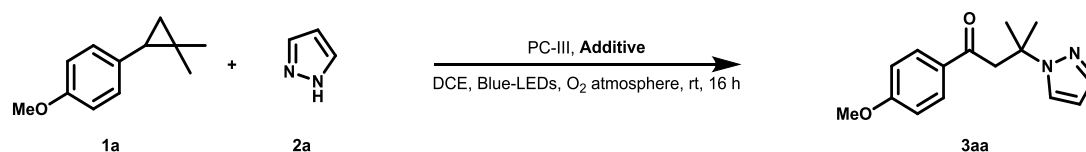

| Entry | Additive                                 | Yield of 3aa(%) | Conversion(%) |
|-------|------------------------------------------|-----------------|---------------|
| 1     | 4Å-MS                                    | 85              | 100           |
| 2     | 3Å-MS                                    | 78              | 100           |
| 3     | 5Å-MS                                    | 80              | 100           |
| 4     | Activated Al <sub>2</sub> O <sub>3</sub> | 36              | 77            |
| 5     | NaOH                                     | NR              | 0             |
| 6     | CaCl <sub>2</sub>                        | 43              | 73            |
| 7     | Na <sub>2</sub> SO <sub>4</sub>          | 62              | 95            |
| 8     | MgSO <sub>4</sub>                        | 75              | 100           |
| 9     | Silica gel                               | 50              | 90            |
| 10    | K-CATALYST                               | 75              | 100           |

<sup>a</sup> Experiments were performed with **1a** (0.1 mmol), **2a** (0.2 mmol), additive (50 mg), photocatalyst (2 mol%) in DCE (0.5 mL), irradiating with blue-LEDs under O<sub>2</sub> atmosphere at room temperature for 16 h. Yield and conversion were determined by <sup>1</sup>H-NMR using 1,1,2,2-tetrachloroethane as internal standard. MS, molecular sieve.

**Supplementary Table 7: Screening photocatalyst loading<sup>a</sup>**

| Entry | mol% | Yield of 3a(%) | Conversion (%) |
|-------|------|----------------|----------------|
| 1     | 2.0  | 85             | 100            |
| 2     | 1.0  | 86             | 100            |
| 3     | 0.5  | 83             | 100            |
| 4     | 0.2  | 85             | 100            |
| 5     | 0.1  | 81             | 100            |

<sup>a</sup> Experiments were performed with **1a** (0.1 mmol), **2a** (0.2 mmol), 4 Å MS (50 mg), photocatalyst (n mol %) in DCE (0.5 mL), irradiating with 15 W blue LEDs under O<sub>2</sub> atmosphere at room temperature for 16 h. Yield and conversion were determined by <sup>1</sup>H-NMR using 1,1,2,2-tetrachloroethane as internal standard.

**Supplementary Table 8: Optimization of reaction concentration and time<sup>a</sup>**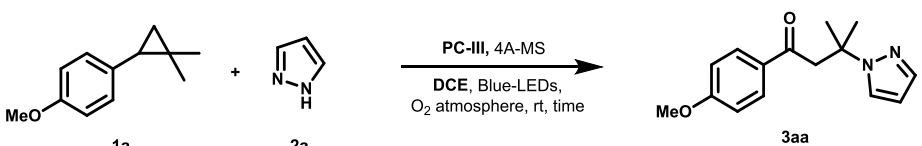

| Entry | Concentration(mol/L) | Time(h) | Yield of 3a(%) | Conversion(%) |
|-------|----------------------|---------|----------------|---------------|
| 1     | 0.1                  | 16      | 78             | 100           |
| 2     | 0.2                  | 16      | 85             | 100           |
| 3     | 0.5                  | 16      | 72             | 90            |
| 4     | 0.2                  | 4       | 35             | 55            |
| 5     | 0.2                  | 8       | 52             | 70            |
| 6     | 0.2                  | 12      | 77             | 92            |

<sup>a</sup> Experiments were performed with **1a** (0.1 mmol), **2a** (0.2 mmol), 4 Å MS (50 mg), photocatalyst (0.2 mol %) in DCE (n M), irradiating with 15 W blue LEDs under O<sub>2</sub> atmosphere at room temperature for certain h. Yield and conversion were determined by <sup>1</sup>H-NMR using 1,1,2,2-tetrachloroethane as internal standard.

### General Procedure E for Oxo-Amination of Aryl Cyclopropanes

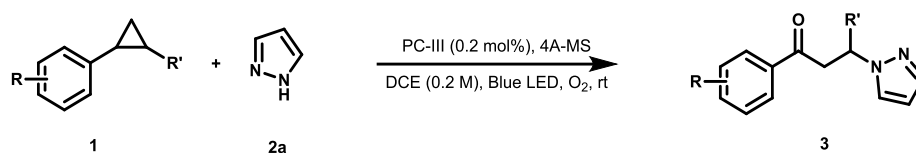

To an oven-dried 10 mL tube equipped with a stir bar, cyclopropanes **1** (0.2 mmol), pyrazole **2a** (0.4 mmol), photocatalyst [Ir(dF(CF<sub>3</sub>)ppy)<sub>2</sub>(4,4'-bpy)](PF<sub>6</sub>) (PC-III) (0.5 mg, 0.2 mol%), 4 Å-MS (100 mg) and anhydrous DCE (1.0 mL, 0.2 M) were added and then the reaction tube was capped and charged with O<sub>2</sub> using a balloon, and the resulting mixture was irradiated under 15W blue LEDs at room temperature. When the reaction was determined to be completed by TLC analysis, the mixture was passed through a short pad of celite and rinsed with DCM (20 mL). The filtrate was evaporated to dryness under reduced pressure and the crude residue was purified by column chromatography on silica gel (PE : EtOAc = 9 : 1 to 4 : 1) to afford the desired product **3**.

### General Procedure F for One-pot Aminoacylation of Olefins

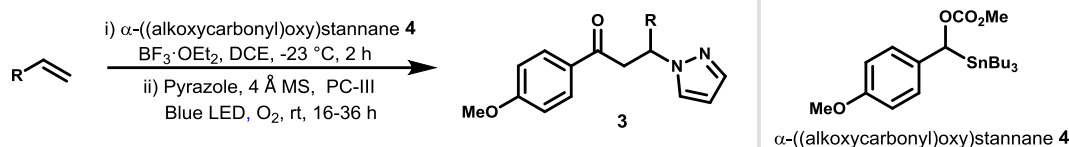

To an oven-dried 50 mL round-bottom flask equipped with a stir bar was added a solution of (4-methoxyphenyl)(tributylstannyl)methyl methyl carbonate (486 mg, 1.0 mmol, 1.0 equiv), alkene substrate (1.1 mmol, 1.1 equiv) and DCE (5.0 mL) under nitrogen atmosphere. The reaction mixture was cooled to -23 °C and BF<sub>3</sub>·OEt<sub>2</sub> (156 mg, 1.1 mmol, 1.1 equiv) was added by syringe and the resulting solution was stirred at this temperature for an additional 2 h. After the reaction reached completion, as judged by TLC, the reaction mixture was warmed to room temperature, and then pyrazole **2a** (2 mmol, 2.0 equiv), photocatalyst [Ir(dF(CF<sub>3</sub>)ppy)<sub>2</sub>(4,4'-bpy)](PF<sub>6</sub>) (PC-III) (2.5 mg, 0.2 mol%), 4 Å-MS (0.5 g) were added. The reaction flask was capped with rubber septum and charged with O<sub>2</sub>, then irradiated with 15W blue LEDs at room temperature. When the reaction was determined to be completed by TLC analysis, the mixture was passed through a short pad of celite and rinsed with DCM (20 mL). The

filtrate was evaporated to dryness under reduced pressure and the crude residue was purified by column chromatography on silica gel (PE : EtOAc = 9 : 1 to 4 : 1) to afford the desired product **3**.

## Supplementary Discussion

### Cyclic Voltammetry

Cyclic voltammograms were taken on a CH Instruments 600E potentiostat using a glassy carbon working electrode, a saturated calomel (SCE) reference electrode, and a Pt mesh counter electrode. The pH was not adjusted and voltammograms were taken at room temperature in a 100 mM MeCN solution of tetrabutylammonium hexafluorophosphate containing 10 mM of the 1-(2,2-dimethylcyclopropyl)-4-methoxybenzene (**1a**). The scan rate was 100 mV/s.

**Supplementary Figure 1.** Cyclic voltammograms of 1-(2,2-dimethylcyclopropyl)-4-methoxybenzene.

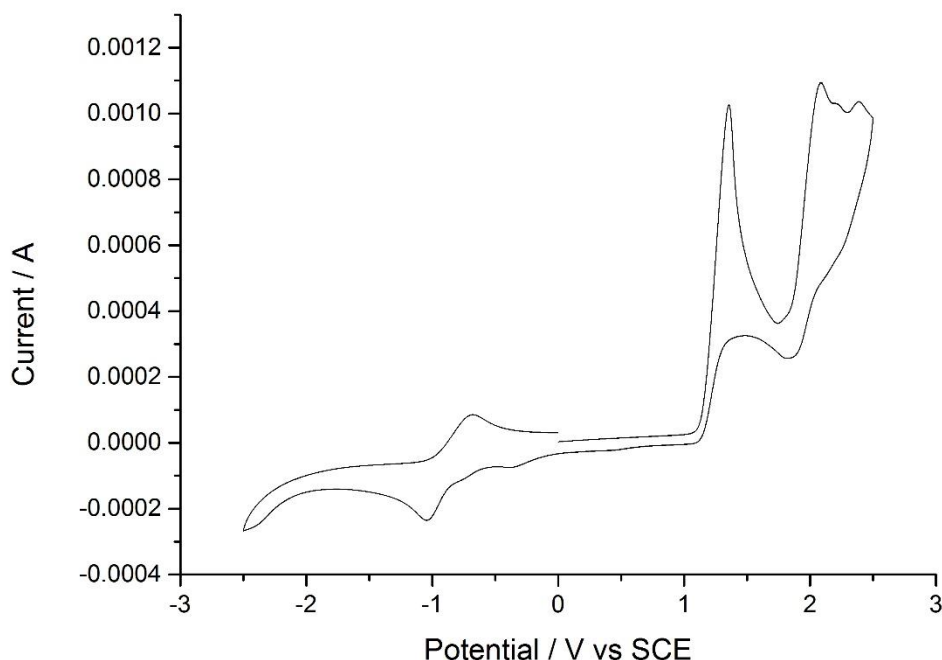

$E_{1/2}^{\text{ox}}$  (**1a**) = +1.30 V vs. SCE in CH<sub>3</sub>CN.



### Emission Quenching Experiments (Stern-Volmer Studies)

Emission intensities were recorded using PerkinElmer LS 55 Fluorescence Spectrometer for all experiments. All  $[\text{Ir}(\text{dF}(\text{CF}_3)\text{ppy})_2(4,4'\text{-bpy})](\text{PF}_6)$  solutions (0.01 mM) were excited at 389 nm and the emission intensity at 575 nm was collected at room temperature under an  $\text{N}_2$  atmosphere. Samples were prepared by adding solutions of photocatalyst, quencher, and DCE to obtain a total volume of 3.0 mL under air atmosphere. The sample was shaken for 1 min and then the emission of the sample was collected. The data show that 1-(2,2-dimethylcyclopropyl)-4-methoxybenzene **1a** is competent at quenching the excited state of the photocatalyst, while Parazole **2a** is shown to be unable to quench this excited state.

#### Constant Iridium, Varied **1a**.

| Species                                                                                       |        | Concentration (mM) |        |         |                   |
|-----------------------------------------------------------------------------------------------|--------|--------------------|--------|---------|-------------------|
| $[\text{Ir}(\text{dF}(\text{CF}_3)\text{ppy})_2(4,4'\text{-(dCF}_3)\text{bpy})](\text{PF}_6)$ |        | 0.005 mM           |        |         |                   |
| <b>1a</b>                                                                                     |        | Varied             |        |         |                   |
| [ <b>1b</b> ] (mM)                                                                            | Scan 1 | Scan 2             | Scan 3 | Average | I <sub>0</sub> /I |
| 0                                                                                             | 658.63 | 655.76             | 657.15 | 657.18  | 1.00              |
| 1                                                                                             | 218.99 | 215.43             | 216.27 | 216.90  | 3.03              |
| 2                                                                                             | 136.55 | 134.68             | 135.33 | 135.52  | 4.85              |
| 3                                                                                             | 110.37 | 112.01             | 110.03 | 110.80  | 5.93              |
| 6                                                                                             | 61.60  | 62.58              | 62.79  | 62.32   | 10.54             |
| 9                                                                                             | 48.84  | 46.16              | 47.69  | 47.56   | 13.82             |
| 12                                                                                            | 35.37  | 35.59              | 35.27  | 35.41   | 18.56             |

#### Constant Iridium, Varied **2a**.

| Species                                                                                       |        | Concentration (mM) |        |         |                   |
|-----------------------------------------------------------------------------------------------|--------|--------------------|--------|---------|-------------------|
| $[\text{Ir}(\text{dF}(\text{CF}_3)\text{ppy})_2(4,4'\text{-(dCF}_3)\text{bpy})](\text{PF}_6)$ |        | 0.005 mM           |        |         |                   |
| <b>2a</b>                                                                                     |        | Varied             |        |         |                   |
| [ <b>2a</b> ] (mM)                                                                            | Scan 1 | Scan 2             | Scan 3 | Average | I <sub>0</sub> /I |
| 0                                                                                             | 658.63 | 655.76             | 657.15 | 657.18  | 1.000             |
| 3                                                                                             | 643.68 | 642.77             | 643.75 | 643.4   | 1.021             |
| 6                                                                                             | 670.7  | 667.31             | 660.04 | 666.02  | 0.987             |
| 9                                                                                             | 659.88 | 662.74             | 660.04 | 660.89  | 0.994             |
| 12                                                                                            | 630.19 | 631.04             | 628.01 | 629.74  | 1.043             |

**Supplementary Figure 2.** Emission intensities record under N<sub>2</sub> atmosphere.

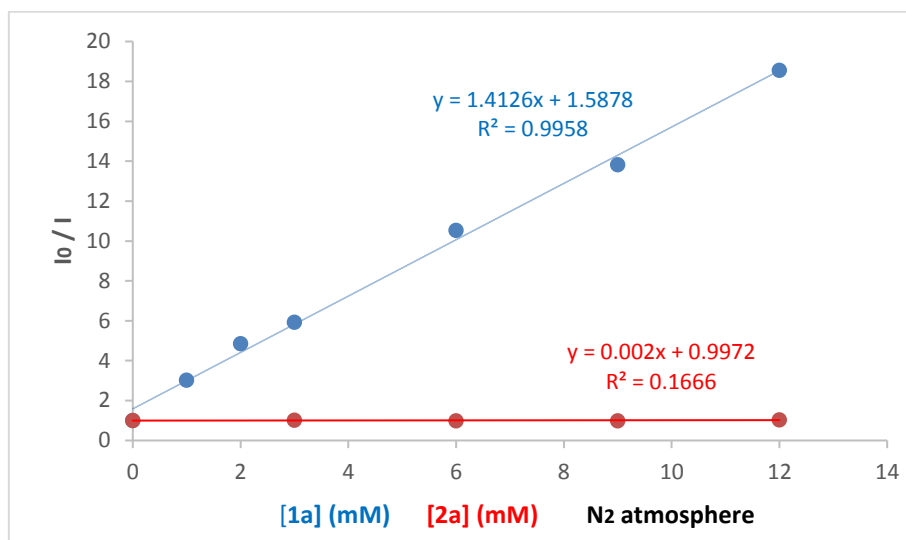

Emission intensities were recorded using PerkinElemer LS 55 Fluorescence Spectrometer for all experiments. All [Ir(dF(CF<sub>3</sub>)ppy)<sub>2</sub>(4,4'-bpy)](PF<sub>6</sub>) solutions (0.01 mM) were excited at 389 nm and the emission intensity at 575 nm was collected at room temperature under an **air atmosphere**. Samples were prepared by adding solutions of photocatalyst, quencher, and DCE to obtain a total volume of 3.0 mL under air atmosphere. The sample was shaken for 1 min and then the emission of the sample was collected. The data show that 1-(2,2-dimethylcyclopropyl)-4-methoxybenzene **1a** is competent at quenching the excited state of the photocatalyst, while Parazole **2a** is shown to be unable to quench this excited state.

#### Constant Iridium, Varied 1a.

| Species                                                                                    | Concentration (mM) |  |  |  |  |
|--------------------------------------------------------------------------------------------|--------------------|--|--|--|--|
| [Ir(dF(CF <sub>3</sub> )ppy) <sub>2</sub> (4,4'-(dCF <sub>3</sub> )bpy)](PF <sub>6</sub> ) | 0.005 mM           |  |  |  |  |
| <b>1a</b>                                                                                  | Varied             |  |  |  |  |

  

| [1b] (mM) | Scan 1 | Scan 2 | Scan 3 | Average | I <sub>0</sub> /I |
|-----------|--------|--------|--------|---------|-------------------|
| 0         | 526.41 | 528.58 | 524.1  | 526.36  | 1.00              |
| 1         | 212.68 | 212.22 | 212.33 | 212.41  | 2.48              |
| 2         | 123.24 | 123.79 | 122.7  | 123.24  | 4.27              |
| 3         | 102.38 | 104.33 | 102.19 | 102.97  | 5.11              |
| 6         | 53.73  | 57.17  | 55.34  | 55.41   | 9.50              |
| 9         | 43.86  | 44.38  | 43.55  | 43.93   | 11.99             |
| 12        | 30.68  | 30.33  | 30.61  | 30.54   | 17.23             |

### Constant Iridium, Varied 2a.

| Species                                                                                       | Concentration (mM) |
|-----------------------------------------------------------------------------------------------|--------------------|
| $[\text{Ir}(\text{dF}(\text{CF}_3)\text{ppy})_2(4,4'\text{-(dCF}_3\text{)ppy})](\text{PF}_6)$ | 0.005 mM           |
| <b>2a</b>                                                                                     | Varied             |

  

| [2a] (mM) | Scan 1 | Scan 2 | Scan 3 | Average | I <sub>0</sub> /I |
|-----------|--------|--------|--------|---------|-------------------|
| 0         | 634.85 | 631.77 | 638.29 | 634.97  | 1.000             |
| 3         | 646.42 | 635.24 | 637.89 | 639.85  | 0.992             |
| 6         | 601.63 | 593.72 | 593.89 | 596.41  | 1.064             |
| 9         | 609.18 | 607.83 | 605.89 | 607.63  | 1.045             |
| 12        | 630.19 | 631.04 | 628.01 | 629.75  | 1.008             |

Supplementary Figure 3. Emission intensities record under air atmosphere.

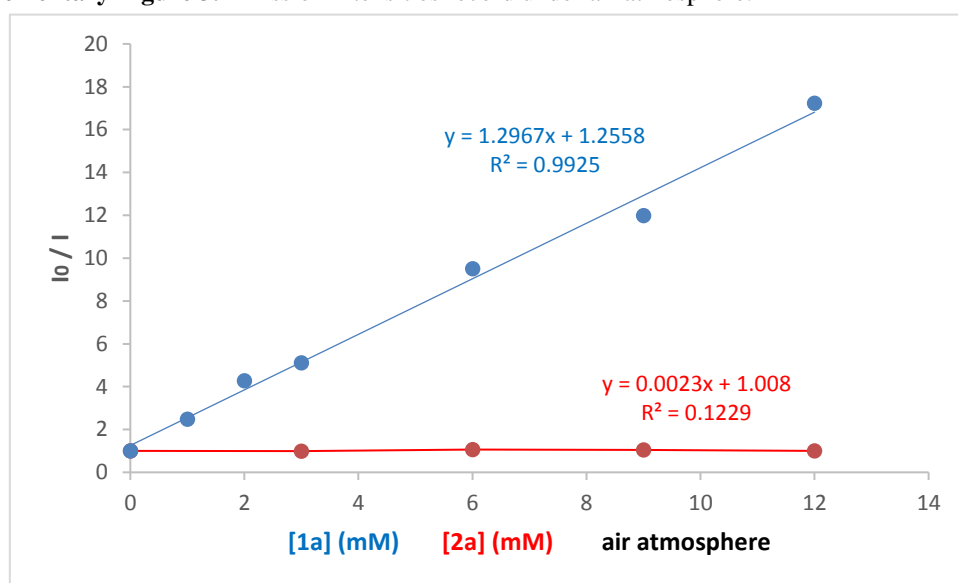

### Light On/Off Experiment

To an over dried 5 mm NMR tube equipped with a stir bar, were added **1b** (0.2 mmol), **2a** (0.4 mmol),  $[\text{Ir}(\text{dF}(\text{CF}_3)\text{ppy})_2(4,4'\text{-bpy})](\text{PF}_6)$  (PC-III) (0.5 mg, 0.2 mol%) and anhydrous DCE (1.0 mL, 0.2 M) in air. The NMR tube was capped and charged with O<sub>2</sub> using a balloon. The resulting mixture was subjected to alternating intervals of irradiation with blue light and dark. The reaction profile is shown below and the yield of product **3ba** as a function of time was determined by <sup>1</sup>H-NMR using 1,1,2,2-tetrachloroethane as an internal standard. These results indicated that continuous irradiation with light was essential for promoting the reaction.

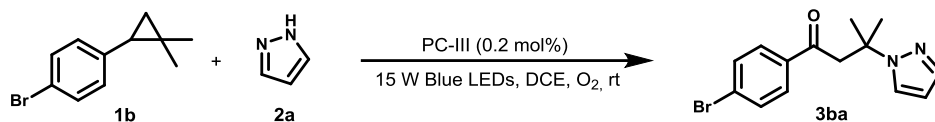

**Supplementary Figure 4.** Light on/off experiment of reaction.

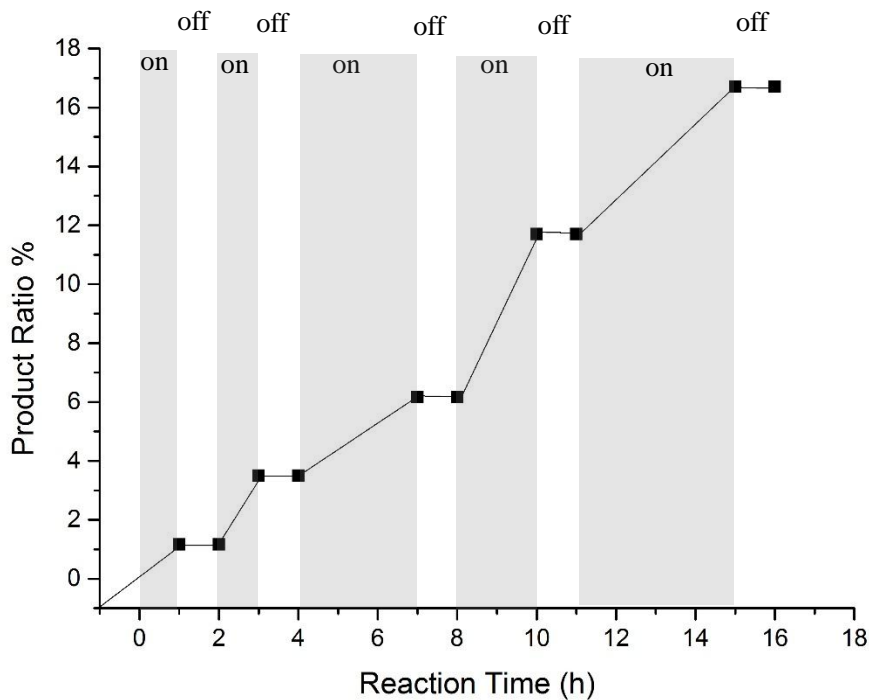

### Determination of the Reaction Quantum Yield ( $\Phi$ )

**Supplementary Figure 5.** Emission spectrum of blue LED used for quantum yield experiments.

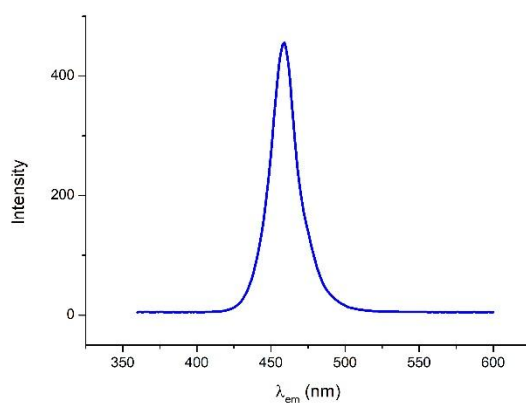

Recorded using a F-4600 FL Spectrophotometer ( $\lambda_{\text{max}} = 459 \text{ nm}$ ).

### Determination of the Light Intensity at 459 nm

Following a modified procedure reported by Melchiorre and co-workers,<sup>16</sup> an aq. ferrioxalate actinometer solution was prepared and stored in the dark. The actinometer

solution measures the photodecomposition of ferric oxalate anions to ferrous oxalate anions, which are then reacted with 1,10-phenanthroline to form  $\text{Fe(Phen)}_3^{2+}$ . Its concentration is then estimated by UV/Vis absorbance at 510 nm. The number of moles of  $\text{Fe(Phen)}_3^{2+}$  complex formed is related to the numbers of photons absorbed by the actinometer solution. Preparation of the solutions used for the studies:

1. Potassium ferrioxalate solution: Potassium ferrioxalate trihydrate (118 mg) and 95-98%  $\text{H}_2\text{SO}_4$  (56  $\mu\text{L}$ ) were added to a 20 mL volumetric flask and filled to the mark with distilled water.
2. Buffer solution: Sodium acetate (0.988 g) and 95-98%  $\text{H}_2\text{SO}_4$  (0.2 mL) were added to a 20 mL volumetric flask and filled to the mark with distilled water.

The actinometry measurements:

- a) 1 mL of the actinometer solution was taken in a quartz cuvette ( $l = 1$  cm). Both the cuvettes of actinometer solution and reaction solution were placed next to each other at a distance of 5 cm away from a 15 W blue LED ( $\lambda_{\text{max}} = 459$  nm) and irradiated for 30 s. The same process was repeated for different time intervals: 60 and 90 s.
- b) After irradiation, the actinometer solution was transferred to a 10 mL volumetric flask containing 1.0 mg of 1,10-phenanthroline in 2 ml of buffer solution. The flask was filled to the mark with distilled water. In a similar manner, a blank solution (10 mL) was also prepared using the actinometer solution stored in dark.
- c) Absorbance of the actinometer solution after complexation with 1,10-phenanthroline at  $\lambda = 510$  nm was measured by UV/Vis spectrophotometry.
- d) According to Beer's law, the number of moles of  $\text{Fe}^{2+}$  formed (x) for each sample was determined by Supplementary Equation 1:

$$\text{mol Fe}^{2+} = \frac{v_1 \cdot v_3 \cdot \Delta A(510\text{nm})}{1000 \cdot v_2 \cdot l \cdot \epsilon(510\text{nm})} \quad (1)$$

Where:

$v_1$  = Irradiated volume (1 mL).

$v_2$  = The aliquot of the irradiated solution taken for the estimation of  $\text{Fe}^{2+}$  ions (1 mL).

$v_3$  = Final volume of the solution after complexation with 1,10-phenanthroline (10 mL).

$\epsilon(510 \text{ nm})$  = Molar extinction coefficient of  $[\text{Fe(Phen)}_3]^{2+}$  complex ( $11100 \text{ L mol}^{-1}\text{cm}^{-1}$ ).

$l$  = Optical path-length of the cuvette (1 cm).

$\Delta A(510 \text{ nm})$  = Difference in absorbance between the irradiated solution and the solution stored in dark (blank).

e) The number of moles of  $\text{Fe}^{2+}$  formed ( $x$ ) was plotted as a function of time ( $t$ ). The slope ( $dx/dt$ ) of the line is equal to the number of moles of  $\text{Fe}^{2+}$  formed per unit time.

f) This slope ( $dx/dt$ ) was correlated to the number of moles of incident photons per unit time ( $F$  = photon flux) by using Supplementary Equation 2:

$$\Phi(\lambda) = \frac{\frac{dx}{dt}}{F \cdot (1 - 10^{-A(\lambda)})} \quad (2)$$

$\Phi(\lambda)$  = The quantum yield for  $\text{Fe}^{2+}$  formation at 450 nm is 0.9.<sup>17</sup>

g)  $A(\lambda)$  = Absorbance of the ferrioxalate actinometer solution at a wavelength of 459 nm, which was measured placing 1 mL of the solution in a cuvette of pathlength 1 cm by UV/Vis spectrophotometry.

Sample calculation according to Supplementary Equation 1:

$$A^0 = 0.023, \quad A^1_{30s} = 0.772, \quad A^1_{60s} = 1.319, \quad A^1_{90s} = 1.918$$
$$\Delta A^1_{30s} = 0.749 \quad \Delta A^1_{60s} = 1.296 \quad \Delta A^1_{90s} = 1.895$$

$$\text{mol Fe}^{2+} (30 \text{ s}) = (1 \text{ mL} \times 10 \text{ mL} \times 0.749) / (1000 \times 1 \text{ mL} \times 1 \text{ cm} \times 111100 \text{ L mol}^{-1} \text{ cm}^{-1})$$
$$= 6.748 \times 10^{-7} \text{ mol}$$

$$\text{mol Fe}^{2+} (60 \text{ s}) = (1 \text{ mL} \times 10 \text{ mL} \times 1.296) / (1000 \times 1 \text{ mL} \times 1 \text{ cm} \times 111100 \text{ L mol}^{-1} \text{ cm}^{-1})$$
$$= 1.1676 \times 10^{-6} \text{ mol}$$

$$\text{mol Fe}^{2+} (90 \text{ s}) = (1 \text{ mL} \times 10 \text{ mL} \times 1.895) / (1000 \times 1 \text{ mL} \times 1 \text{ cm} \times 111100 \text{ L mol}^{-1} \text{ cm}^{-1})$$
$$= 1.7072 \times 10^{-6} \text{ mol}$$

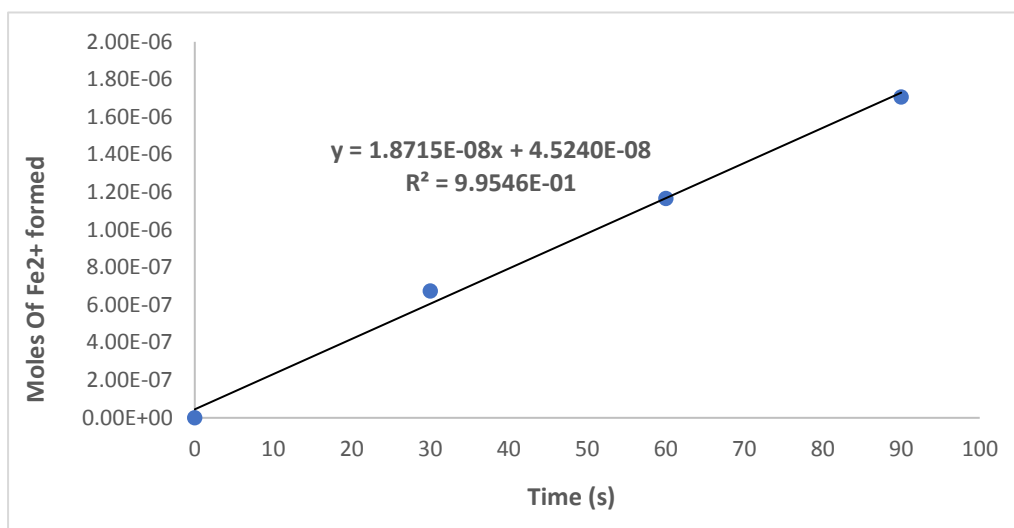

**Supplementary Figure 6.** Moles of Fe<sup>2+</sup> formed being plotted as a function of time.

Moles of [Fe(Phen)<sub>3</sub>]<sup>2+</sup> per unit of time formed due to decomposition of the actinometer solution at 459 nm blue Led irradiation as shown in Supplementary Equation 3:

$$F = \frac{\frac{dx}{dt}}{\Phi(\lambda) \cdot (1 - 10^{-A(\lambda)})} \quad (3)$$

$$A(\lambda)_{30s} = 0.649,$$

$$A(\lambda)_{60s} = 1.134,$$

$$A(\lambda)_{90s} = 1.638$$

$$F_{30s} = (1.8715 \times 10^{-8}) / (0.9 \times (1 - 10^{-0.649})) = 2.681 \times 10^{-8}$$

$$F_{60s} = (1.8715 \times 10^{-8}) / (0.9 \times (1 - 10^{-1.134})) = 2.244 \times 10^{-8}$$

$$F_{90s} = (1.8715 \times 10^{-8}) / (0.9 \times (1 - 10^{-1.638})) = 2.128 \times 10^{-8}$$

$$F_{\text{average}} = (F_{30s} + F_{60s} + F_{90s}) / 3 = 2.351 \times 10^{-8}$$

h) The determined incident photons per unit time (F) is  $2.351 \times 10^{-8}$  einsteins/s.

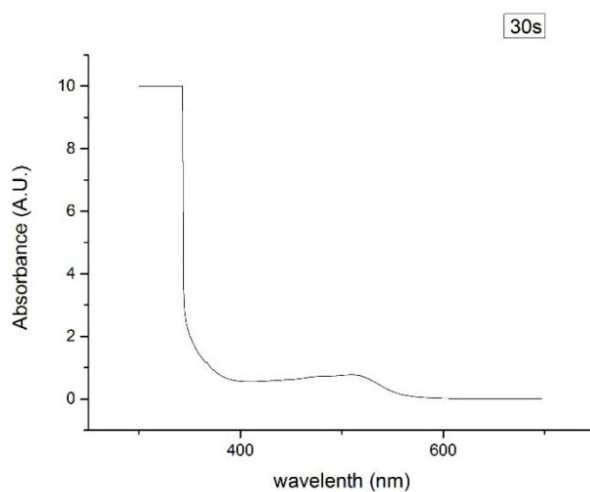

**Supplementary Figure 7.** Absorbance of the 30 seconds irradiated ferrioxalate actinometer solution.

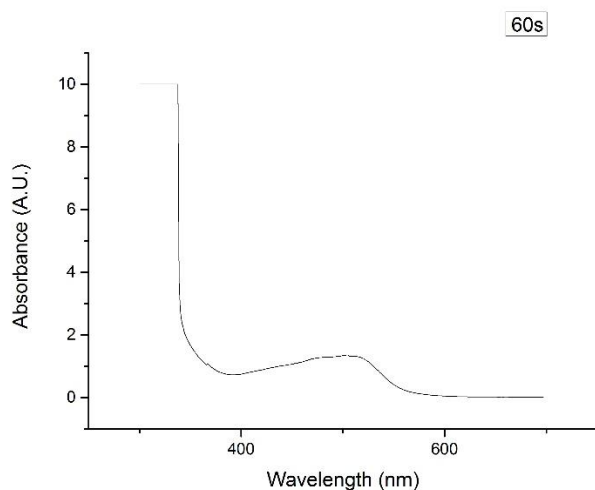

**Supplementary Figure 8.** Absorbance of the 60 seconds irradiated ferrioxalate actinometer solution.

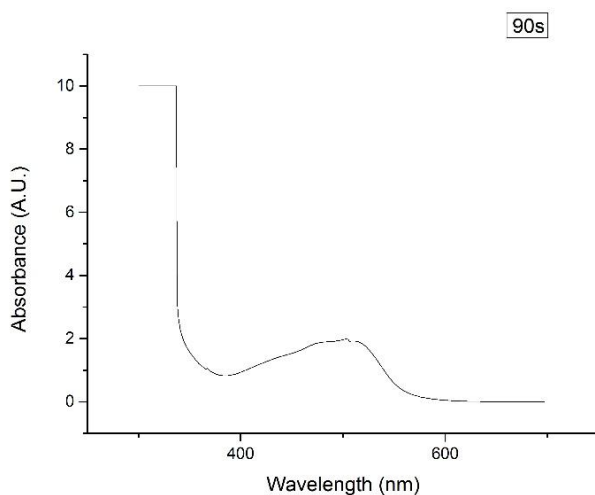

**Supplementary Figure 9.** Absorbance of the 90 seconds irradiated ferrioxalate actinometer solution.

### Determination of the Reaction Quantum Yield

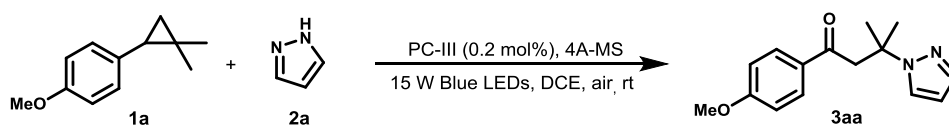

To a 3 mL quartz cuvette with two sides taped over with electrical tape, **1a** (35 mg, 0.2 mmol, 1 equiv), **2a** (27 mg, 0.4 mmol, 2 equiv), [Ir(dF(CF<sub>3</sub>)ppy)<sub>2</sub>(4,4'-bpy)](PF<sub>6</sub>) (PC-III) (1.0 mg, 0.2 mol%) and anhydrous DCE (1.0 mL, 0.2 M), 4Å-MS (100 mg) and a small stir bar were added and then the quartz cuvette was capped and charged with O<sub>2</sub> using a balloon. The sample was stirred and irradiated for 10800 s (3.0 h) at  $\lambda_{\text{max}} = 459$  nm at rt. After irradiation, the yield of product **3aa** was determined to be 16.6% (3.32



$\times 10^{-5}$  mol of **3aa**) by  $^1\text{H}$  NMR integration against an internal standard. The reaction quantum yield ( $\Phi$ ) was determined using the Supplementary Equation 4 where the photon flux is  $2.35 \times 10^{-8}$  einstein  $\text{s}^{-1}$  (described above),  $t$  is the reaction time (10800 s) and  $f$  is the fraction of incident light absorbed by the reaction mixture. An absorbance of the reaction mixture at 459 nm was measured to be 1.426

$$\Phi = \frac{\text{mol of product formed}}{\text{photon flux} \cdot t \cdot f} \quad (4)$$

Sample quantum yield calculation according to Supplementary Equation 4:

$$f = 1 - 10^{-1.426} = 0.9625$$

$$\Phi = 3.32 \times 10^{-5} \text{ mol} / (2.351 \times 10^{-8} \text{ einstein s}^{-1} \times 10800 \text{ s} \times 0.9625) = 0.14$$

The reaction quantum yield ( $\Phi$ ) was thus determined to be 0.14.

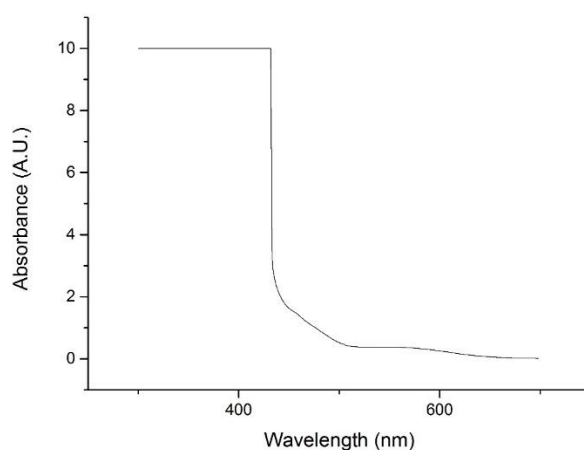

**Supplementary Figure 10.** Absorbance of the reaction mixture solution.

### Radical Inhibition Experiment with TEMPO

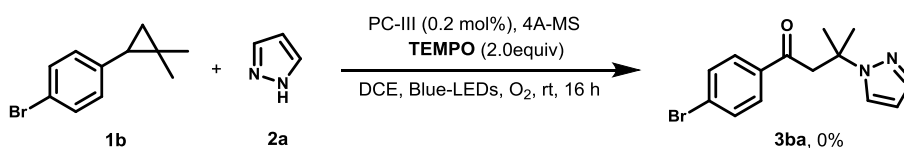

To an oven-dried 10 mL Schlenk tube equipped with a stir bar, **1b** (0.2 mmol), **2a** (0.4 mmol), [Ir(dF(CF<sub>3</sub>)ppy)<sub>2</sub>(4,4'-bpy)](PF<sub>6</sub>) (PC-III) (1.0 mg), 4Å-MS (100 mg), TEMPO (0.4 mmol) and dry DCE (1.0 mL) were added under air. The reaction flask was capped with a rubber septum, charged with O<sub>2</sub>, and the resulting mixture was irradiated under 15W blue LEDs for 16 h. The reaction solution was monitored by TLC, which showed no desired product formation.

## Evidence of Alkyl Hydroperoxide Intermediate

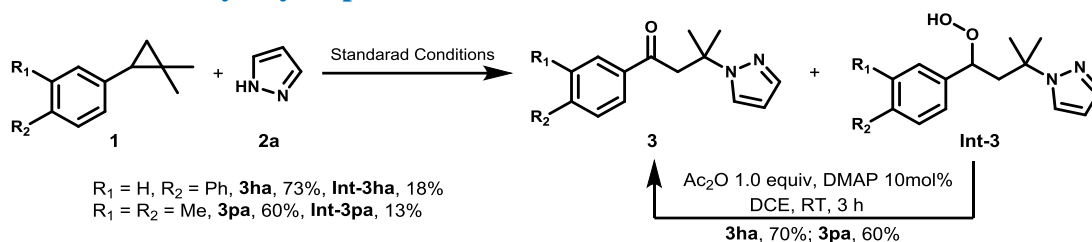

To an oven-dried 10 mL Schlenk tube equipped with a stir bar was added **1** (0.2 mmol), **2a** (0.4 mmol), [Ir(dF(CF<sub>3</sub>)ppy)<sub>2</sub>(4,4'-bpy)](PF<sub>6</sub>) (PC-III) (0.5 mg), 4Å-MS (100 mg) and dry DCE (1.0 mL) under air at room temperature. The reaction flask was capped with a rubber septum, charged with O<sub>2</sub> using a balloon, and the resulting mixture was irradiated under 15 W blue LEDs for 24 h. Upon completion of the reaction, the mixture was passed through a short pad of celite. The filtrate was concentrated and purified by column chromatography on silica gel (PE : EtOAc = 9 : 1 to 4 : 1). In addition to the desired products (PE : EtOAc = 4 : 1, R<sub>f</sub><sup>3ha</sup> = 0.55, R<sub>f</sub><sup>3pa</sup> = 0.40), the hydroperoxide intermediates **Int-3ha** (PE : EtOAc = 4 : 1, R<sub>f</sub><sup>Int-3ha</sup> = 0.35, 18% isolated yield) and **Int-3pa** (PE : EtOAc = 4 : 1, R<sub>f</sub><sup>Int-3pa</sup> = 0.25, 13% isolated yield) were isolated. To a flask with a stir bar, **Int-3ha/Int-3pa** was added dimethylaminopyridine (DMAP) (10 mol%), Ac<sub>2</sub>O (1.0 equiv) and DCE (0.5 mL). The reaction mixture was stirred at rt for 3 h after which TLC showed all of the starting material was consumed. The reaction mixture was diluted with ethyl acetate (20 mL) and brine (20 mL). The phases were separated and the aqueous layer was extracted with EtOAc (20 mL×2). The combine organic layers were dried over anhydrous Na<sub>2</sub>SO<sub>4</sub>, filtered and concentrated under reduced pressure. The product was separated from the residue by column chromatography on silica gel ((PE : EtOAc = 4 : 1, R<sub>f</sub><sup>3ha</sup> = 0.55, 70% yield; R<sub>f</sub><sup>3pa</sup> = 0.40, 60% yield), and the structure of the obtained compound was confirmed to be identical to **3ha/3pa** by NMR.

## Ruling Out the Intermediacy of 1,2-Dioxolane

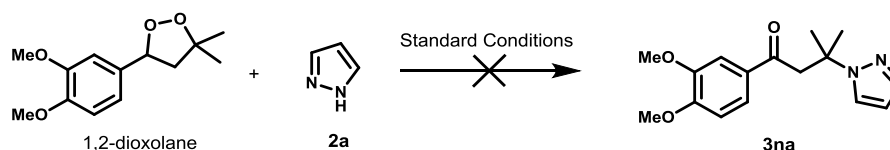

To an oven-dried 10 mL tube equipped with a stir bar, 1,2-dioxolane<sup>15</sup> (10 mg, 0.04 mmol), pyrazole **2a** (6.8 mg, 0.08 mmol), photocatalyst [Ir(dF(CF<sub>3</sub>)ppy)<sub>2</sub>(4,4'-bpy)](PF<sub>6</sub>) (PC-III) (0.1 mg, 0.2 mol%), 4Å-MS (50 mg) and anhydrous DCE (0.5 mL, 0.1 M) were added. The reaction tube was capped and charged with O<sub>2</sub>, and the resulting mixture was irradiated under 15W blue LEDs at room temperature for 16 h. The reaction was monitored by TLC. TLC analysis indicated that all 1,2-dioxolane was consumed but no product **3na** was detected.

### The Examination of Reactions Between Pyrazole and **1ak**, **1ba** and **1bb**

Following the General Procedure E, **3aka** and **5aka** was obtained from **1ak** in 22%, 35% yields, respectively, **6baa** was obtained from **1ba** in 30% yield and **5bba** was obtained from **1bb** in 50% yield.

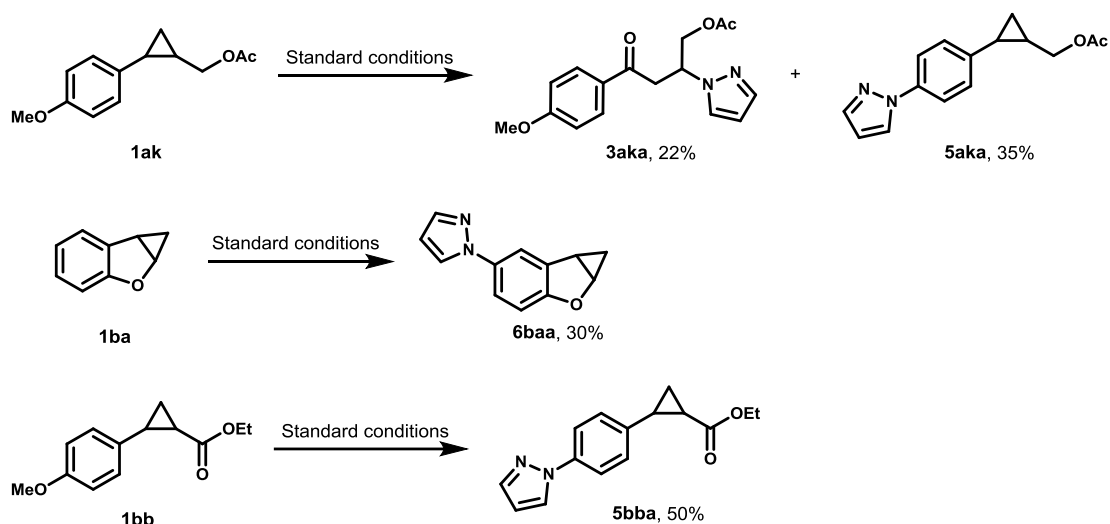

As we can obtain the desired products of to **3aka**, the SET oxidation of respective substrates for the generation of radical cation intermediates therefore is accomplished. The present reaction predominately proceeded through a concerted nucleophilic attack/ring-opening manifold, and the positive charge is believed to be delocalized over the whole molecule, not only the aryl moiety but also the cyclopropyl ring system. Therefore, the installation of electronically negative substituent proximal to the cyclopropyl ring would inevitably affect the charge distribution, thus making the carbon atom of cyclopropane proximal to those electron-withdrawing functionalities less positively charged and in turn more reluctant to undergo nucleophilic attack by azaarenes. Furthermore, in addition to the formation of desired product **3aka**, the

demethoxyamination product **5aka** was also obtained in 35% yield in the reaction of **1ak**. In this case, the nucleophilic aromatic substitution by azaarene compares favorably with ring-opening functionalization of cyclopropane ring because of the proximity of –OAc functionality.

Furthermore, when **1ba** (1a,6b-dihydro-1H-cyclopropa[b]benzofuran) was subjected to the standard reaction conditions, only homolytic aromatic substitution product **6baa** was obtained in 30% yield with no any ring-opening oxo-amination being observed. This phenomenon is consistent with the observation of Nicewicz that in the case of photoredox catalyzed homolytic aromatic substitution of electron-rich arene derivatives, the nucleophile tends to attack the para-position of arenes with electron-donating substituents (*J. Am. Chem. Soc.* **2017**, *139*, 11288). Therefore, the experimental result from **1ba** indicates that after one electron oxidation the positive charge reside mainly on the aryl ring, with the cyclopropyl ring embed in oxo-bicyclic system poorly participated in charge delocalization, probably because of poor orbit overlap.

In the case of **1bb**, the reaction selectively underwent nucleophilic aromatic substitution to afford **5bba** in 50% yield.

### **The Examination of Aza-Nucleophiles with Different Oxidation Potentials**

The prerequisite for the success of this reaction is the efficient and selective SET oxidation of aryl cyclopropane substrates, therefore, the selected aza-nucleophile should tolerate the oxidation potentials that enable smooth SET oxidation of cyclopropane derivatives. On the other hand, the success of ring opening of cyclopropane radical cation intermediate is also directly affected by the nucleophilicity of azaarenes. This issue we faced is that nucleophiles with high nucleophilicity are always more easily undergo SET oxidation. We have tested a set of aza-nucleophiles with varying oxidation potentials and found that nucleophiles with oxidation potentials lower than aryl cyclopropane substrate are not viable in the present reaction.

**Supplementary Table 9: Reaction results of different Aza-nucleophiles.**

| Aza-nucleophiles                                                                    | Oxidation potentials vs. SCE | Reaction results   |
|-------------------------------------------------------------------------------------|------------------------------|--------------------|
| 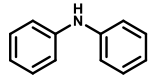   | +0.92 V                      | No reaction        |
|    | +0.95 V                      | No reaction        |
|    | +1.15 V                      | No reaction        |
|    | +1.16 V                      | No reaction        |
|    | +1.70V                       | No desired product |
|    | +2.21 V                      | Reaction succeeded |
|    | +2.30V                       | No desired product |
|   | > +2.5 V                     | Reaction succeeded |
|  | > +2.5 V                     | No desired product |
|  | > +2.5 V                     | No desired product |

### Experiment with Enantiometrically Enriched Diphenyl Cyclopropane

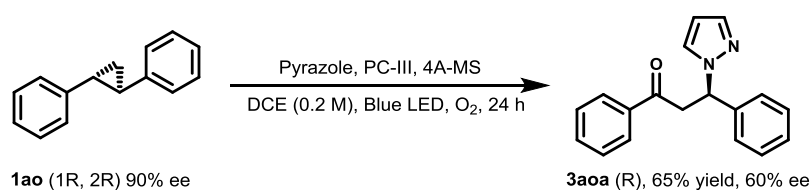

The reaction of **1ao** with 90% ee led to the generation of the product **3aoa** in 65% yield with 60% ee after 24 h. This result indicates that the oxo-amination mainly proceeded through a concerted nucleophilic attack/ring-opening fashion ( $S_N2$ -like process), while the erosion of stereochemistry could potentially derive from a minor contribution of ring-opening followed by nucleophilic attack manifold ( $S_N1$ -like process). However, the possibility of racemization of enantiomerically enriched diphenyl cyclopropane substrate through a cascade of sensitization via triplet energy transfer, homolytic ring cleavage and radical recombination-based ring closure should also be considered. To

unravel this possibility, the reaction of **(1R,2R)-1ao** was monitored, which clearly demonstrated that cyclopropane substrate underwent racemization under the present reaction conditions.

**Supplementary Figure 11.** The Evolution of ee Values of Substrate **(1R,2R)-1ao** and Product **(R)-3aoa** as the Reaction Progresses.

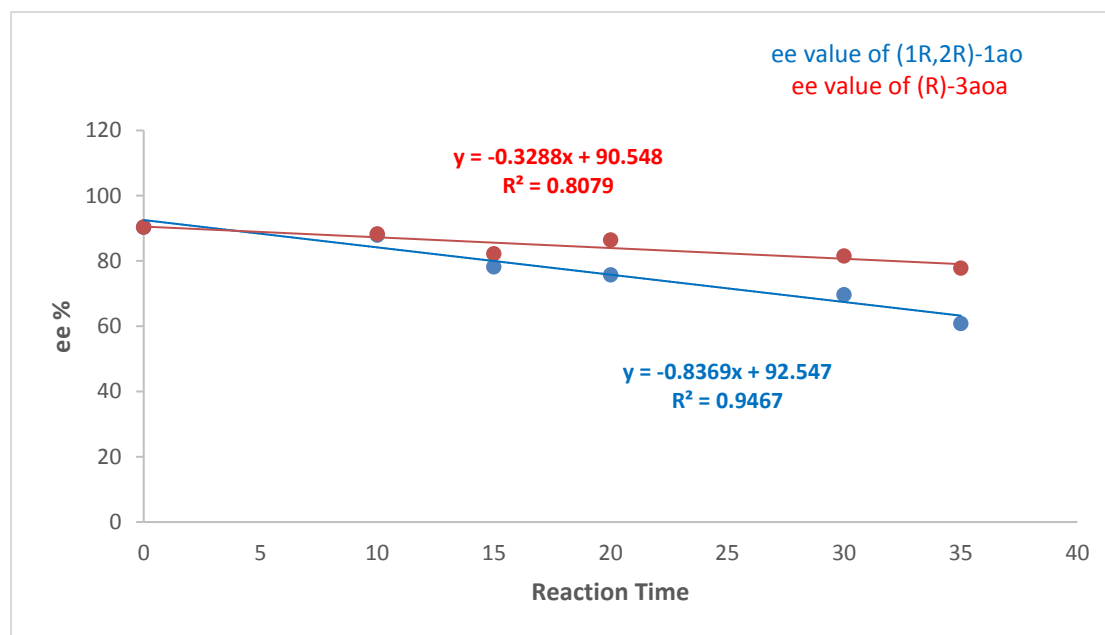

### HPLC Chromatography of the Starting Materials and Products

**Supplementary Figure 12.** HPLC Chromatography of Racemic 1,2-diphenylcyclopropane (**1ao**) (Chiralpak AD-H 250\*4.6 mm/5 um column, 5% isopropanol in hexane, 1.0 mL/min, 210 nm)

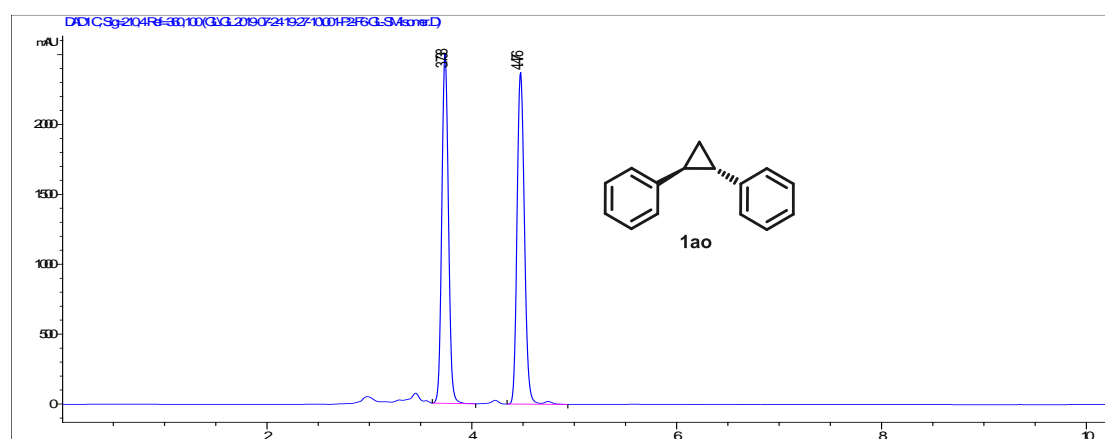

| Peak # | RetTime [min] | Type | Width [min] | Area [mAU*s] | Height [mAU] | Area % |
|--------|---------------|------|-------------|--------------|--------------|--------|
| 1      | 3.738         | BB   | 0.0662      | 11193.6      | 2503.8       | 48.325 |
| 2      | 4.476         | BV R | 0.0731      | 11969.7      | 2376.9       | 51.675 |
| Total  |               |      |             | 7108.9       | 1574.3       | 100%   |

**Supplementary Figure 13.** HPLC Chromatography of (1R,2S)-1,2-diphenylcyclopropane (**cis-1ao**)  
(Chiralpak AD-H 250\*4.6 mm/5 um column, 5% isopropanol in hexane, 1.0 mL/min, 210 nm)

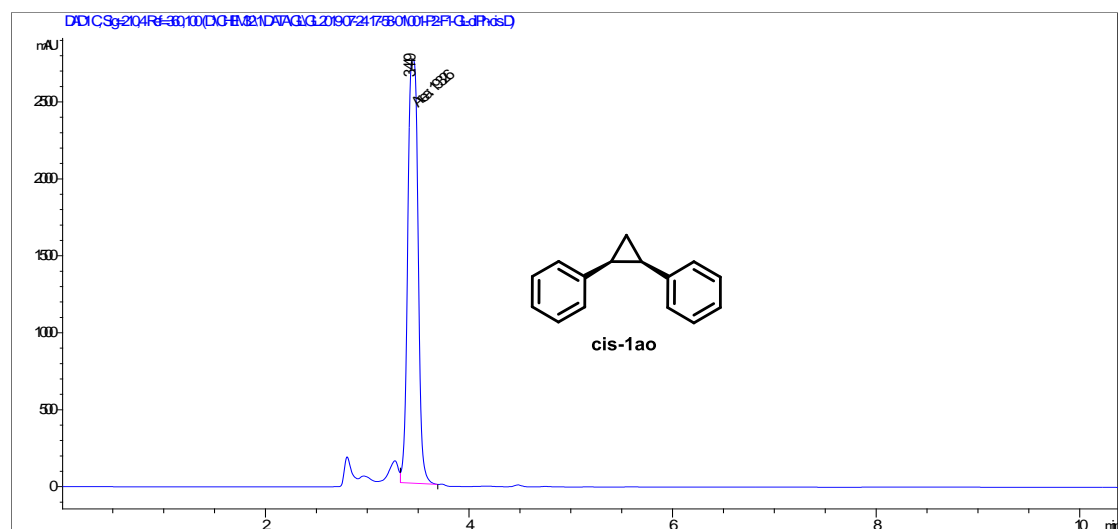

| Peak # | RetTime [min] | Type | Width [min] | Area [mAU*s] | Height [mAU] | Area % |
|--------|---------------|------|-------------|--------------|--------------|--------|
| 1      | 3.449         | FM   | 0.1169      | 19326        | 2754.3       | 100.00 |
| Total  |               |      |             | 19326        | 2754.3       | 100%   |

**Supplementary Figure 14.** HPLC Chromatography of (1R,2R)-1,2-diphenylcyclopropane ((**1R,2R**)-**1ao**).

(Chiralpak AD-H 250\*4.6 mm/5 um column, 5% isopropanol in hexane, 1.0 mL/min, 210 nm)

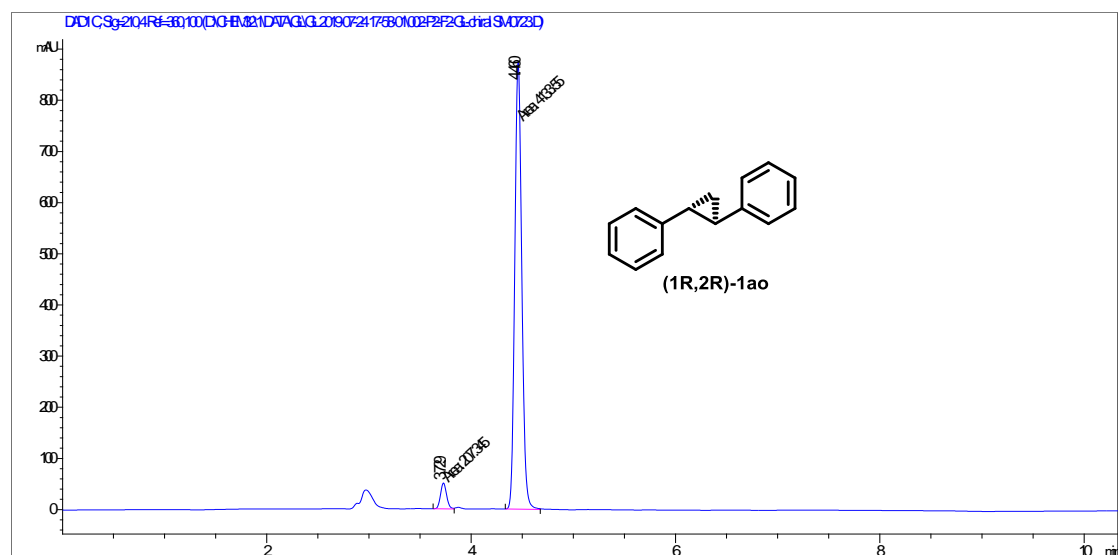

| Peak # | RetTime [min] | Type | Width [min] | Area [mAU*s] | Height [mAU] | Area % |
|--------|---------------|------|-------------|--------------|--------------|--------|
| 1      | 3.729         | MF   | 0.0681      | 207.3        | 50.8         | 4.777  |
| 2      | 4.46          | MF   | 0.0786      | 4133.5       | 876.8        | 95.223 |
| Total  |               |      |             | 4340.8       | 927.6        | 100%   |

(ee 90.446%)

**Supplementary Figure 15.** HPLC Chromatography of Racemic 1,3-diphenyl-3-(1H-pyrazol-1-yl)propan-1-one (**3a0a**)

(Chiralpak AD-H 250\*4.6 mm/5 um column, 5% isopropanol in hexane, 1.0 mL/min, 210 nm)

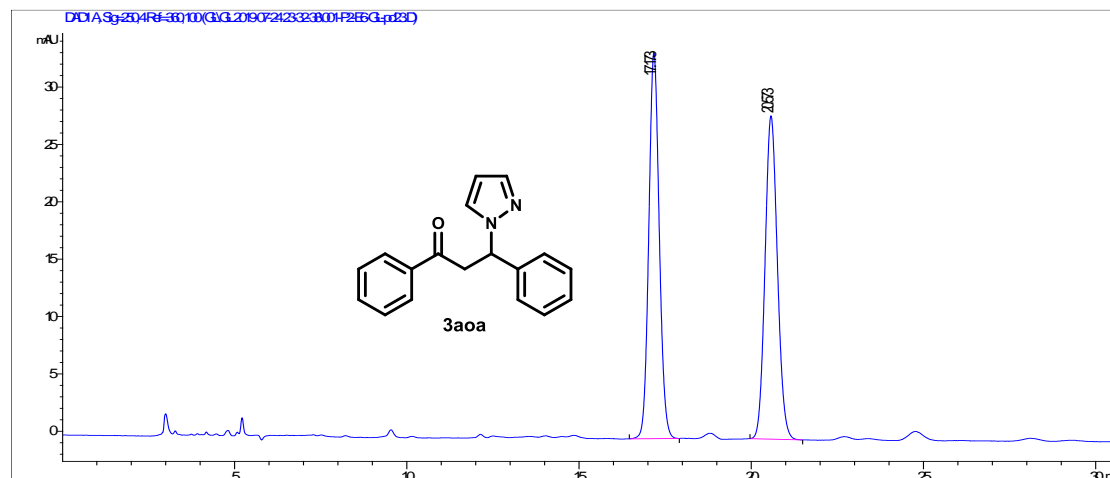

| Peak # | RetTime [min] | Type | Width [min] | Area [mAU*s] | Height [mAU] | Area % |
|--------|---------------|------|-------------|--------------|--------------|--------|
| 1      | 17.173        | BB   | 0.3237      | 708.7        | 33.7         | 50.191 |
| 2      | 20.573        | BB   | 0.3832      | 703.3        | 28.2         | 49.809 |
| Total  |               |      |             | 1412         | 61.9         | 100%   |

**Supplementary Figure 16.** HPLC Chromatography of Reaction solution of 10 min.

(Chiralpak AD-H 250\*4.6 mm/5 um column, 5% isopropanol in hexane, 1.0 mL/min, 210 nm)

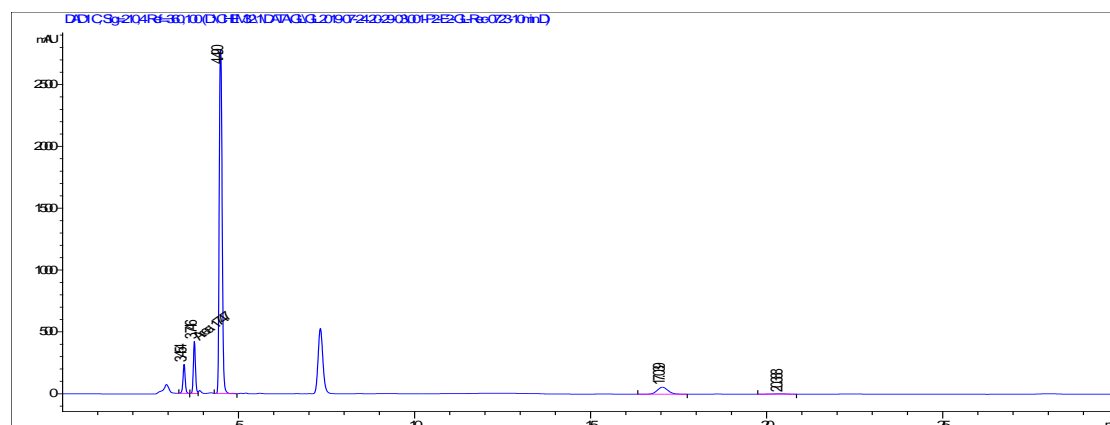

| Peak # | RetTime [min] | Type | Width [min] | Area [mAU*s] | Height [mAU] | Area % |
|--------|---------------|------|-------------|--------------|--------------|--------|
| 1      | 3.454         | BB   | 0.0666      | 1014.4       | 233.9        | 5.098  |
| 2      | 3.746         | MF   | 0.0689      | 1747         | 422.8        | 8.779  |
| 3      | 4.49          | VV R | 0.0906      | 15887.7      | 2781.7       | 79.838 |
| 4      | 17.039        | BB   | 0.3239      | 1178.1       | 56.3         | 5.920  |
| 5      | 20.388        | BB   | 0.3855      | 72.8         | 2.8          | 0.366  |
| Total  |               |      |             | 19900        | 3497.5       | 100%   |

((**1R,2R**)-**1ao** ee 87.99%)

((**R**)-**3a0a** ee 88.36%)



**Supplementary Figure 17.** HPLC Chromatography of Reaction solution of 15 min.

(Chiralpak AD-H 250\*4.6 mm/5 um column, 5% isopropanol in hxane, 1.0 mL/min, 210 nm)

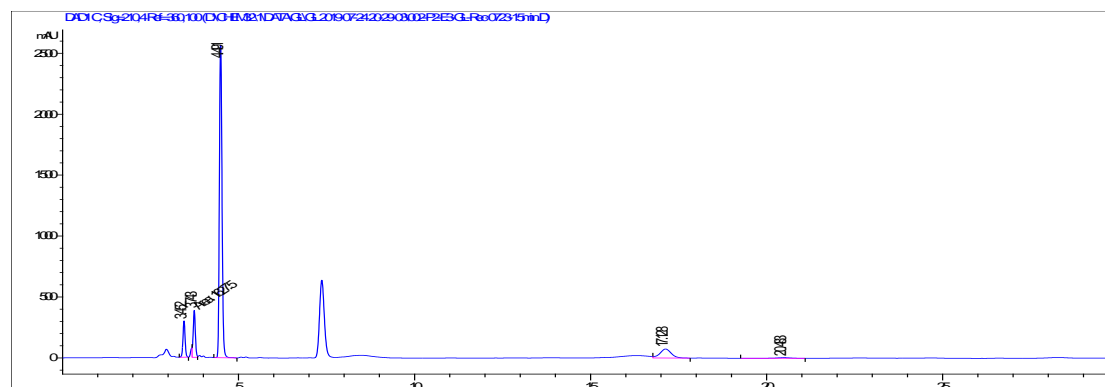

| Peak # | RetTime [min] | Type | Width [min] | Area [mAU*s] | Height [mAU] | Area % |
|--------|---------------|------|-------------|--------------|--------------|--------|
| 1      | 3.452         | BB   | 0.0649      | 1258.4       | 300.5        | 6.968  |
| 2      | 3.743         | MF   | 0.0704      | 1627.5       | 385.3        | 9.012  |
| 3      | 4.491         | VV R | 0.0826      | 13373        | 2573.2       | 74.049 |
| 4      | 17.128        | BB   | 0.3367      | 1641.1       | 74           | 9.087  |
| 5      | 20.483        | BB   | 0.4442      | 159.8        | 5.1          | 0.885  |
| Total  |               |      |             | 18059.8      | 3338.1       | 100%   |

((1R,2R)-1ao ee 78.30%)

((R)-3aoa ee 82.25%)

**Supplementary Figure 18.** HPLC Chromatography of Reaction solution of 20 min.

(Chiralpak AD-H 250\*4.6 mm/5 um column, 5% isopropanol in hxane, 1.0 mL/min, 210 nm)

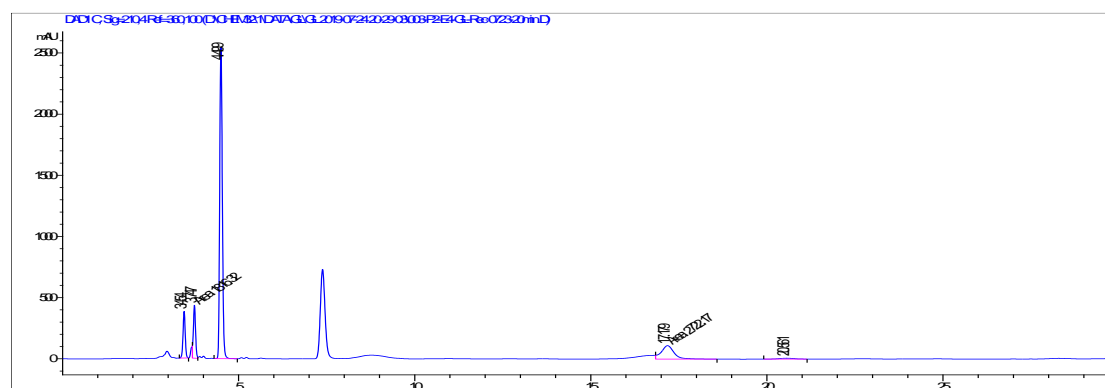

| Peak # | RetTime [min] | Type | Width [min] | Area [mAU*s] | Height [mAU] | Area % |
|--------|---------------|------|-------------|--------------|--------------|--------|
| 1      | 3.454         | BB   | 0.0665      | 1649.7       | 381.1        | 8.414  |
| 2      | 3.747         | FM   | 0.0697      | 1816.3       | 434.5        | 9.263  |
| 3      | 4.499         | VV R | 0.0823      | 13223.4      | 2557.6       | 67.439 |
| 4      | 17.179        | FM   | 0.4143      | 2722.2       | 109.5        | 13.883 |
| 5      | 20.561        | BB   | 0.4114      | 196.2        | 7.2          | 1.001  |
| Total  |               |      |             | 19607.8      | 3489.9       | 100%   |

((1R,2R)-1ao ee 75.84%)

((R)-3aoa ee 86.55%)

**Supplementary Figure 19.** HPLC Chromatography of Reaction solution of 30 min.

(Chiralpak AD-H 250\*4.6 mm/5 um column, 5% isopropanol in hxane, 1.0 mL/min, 210 nm)

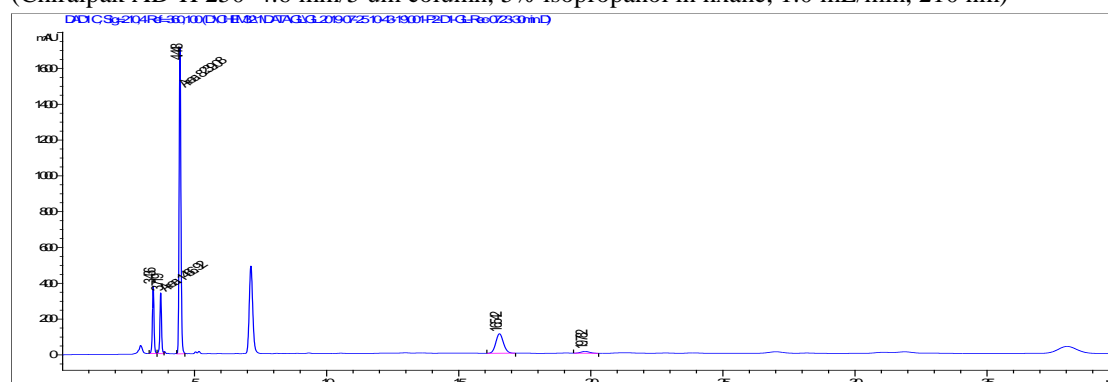

| Peak # | RetTime [min] | Type | Width [min] | Area [mAU*s] | Height [mAU] | Area % |
|--------|---------------|------|-------------|--------------|--------------|--------|
| 1      | 3.436         | BV   | 0.0663      | 1632.2       | 378.6        | 11.894 |
| 2      | 3.719         | MF   | 0.0717      | 1466.9       | 340.9        | 10.689 |
| 3      | 4.448         | MF   | 0.0797      | 8239.1       | 1721.9       | 60.038 |
| 4      | 16.542        | BB   | 0.3083      | 2165.8       | 108.8        | 15.782 |
| 5      | 19.782        | BB   | 0.3551      | 219.1        | 9.7          | 1.596  |
| Total  |               |      |             | 13723.1      | 2559.9       | 100%   |

((1R,2R)-1ao ee 69.77%)  
((R)-3aoa ee 81.63%)

**Supplementary Figure 20.** HPLC Chromatography of Recovered (1R,2R)-1ao after 35 min

(Chiralpak AD-H 250\*4.6 mm/5 um column, 5% isopropanol in hxane, 1.0 mL/min, 210 nm)

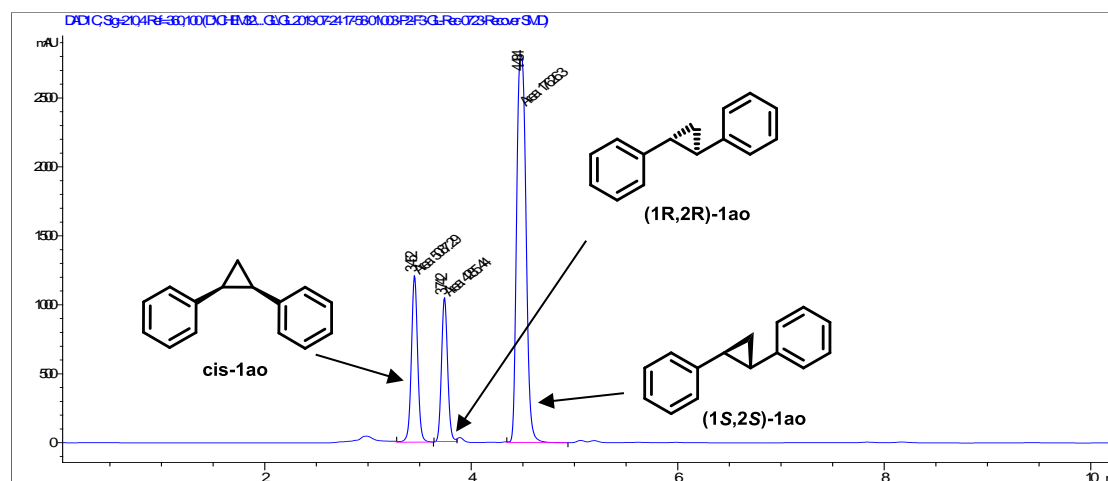

| Peak # | RetTime [min] | Type | Width [min] | Area [mAU*s] | Height [mAU] | Area % |
|--------|---------------|------|-------------|--------------|--------------|--------|
| 1      | 3.452         | FM   | 0.0699      | 5087.3       | 1212.6       | 18.842 |
| 2      | 3.742         | MM   | 0.0682      | 4285.4       | 1047.3       | 15.873 |
| 3      | 4.484         | FM   | 0.1045      | 17626.3      | 2810.4       | 65.285 |
| Total  |               |      |             | 26999        | 5070.3       | 100%   |

(ee 60.88%)

**Supplementary Figure 21.** HPLC Chromatography of isolated (**R**)-**3aoa** after 35 min  
(Chiralpak AD-H 250\*4.6 mm/5 um column, 5% isopropanol in hxane, 1.0 mL/min, 210 nm)

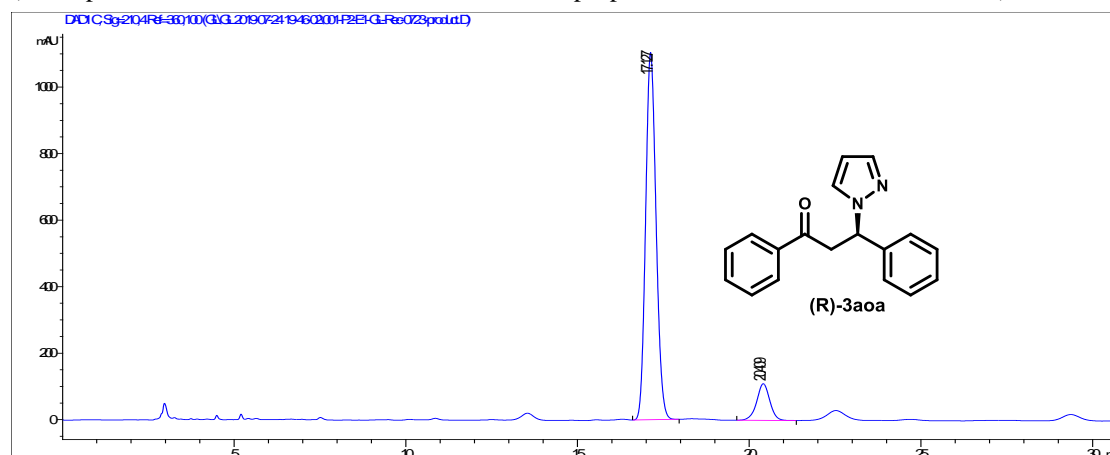

| Peak # | RetTime [min] | Type | Width [min] | Area [mAU*s] | Height [mAU] | Area % |
|--------|---------------|------|-------------|--------------|--------------|--------|
| 1      | 17.127        | BB   | 0.3288      | 23361.7      | 1104.5       | 88.943 |
| 2      | 20.409        | BB   | 0.4039      | 2904.1       | 110          | 11.057 |
| Total  |               |      |             | 26265.8      | 1214.5       | 100%   |

(ee 77.886%)

**Supplementary Figure 22.** HPLC Chromatography of isolated (**R**)-**3aoa** after 24 h  
(Chiralpak AD-H 250\*4.6 mm/5 um column, 5% isopropanol in hxane, 1.0 mL/min, 210 nm)

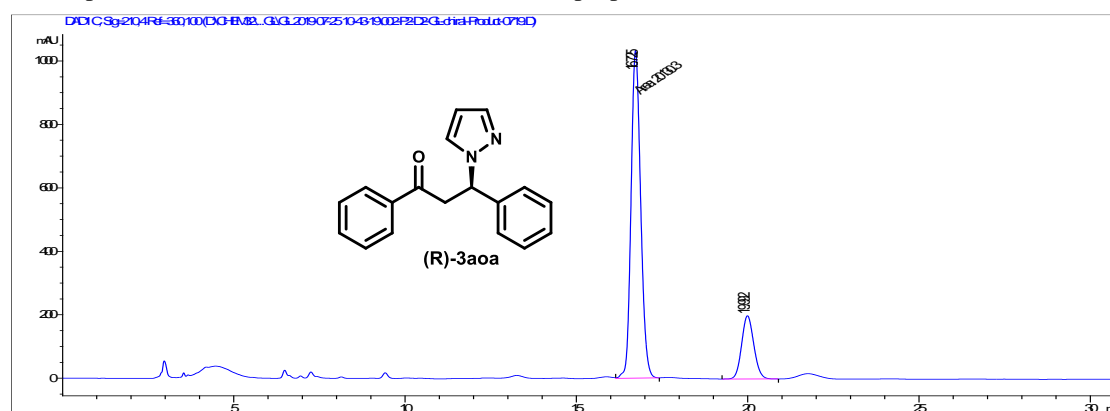

| Peak # | RetTime [min] | Type | Width [min] | Area [mAU*s] | Height [mAU] | Area % |
|--------|---------------|------|-------------|--------------|--------------|--------|
| 1      | 16.725        | FM   | 0.3251      | 20130.3      | 1031.9       | 80.392 |
| 2      | 19.992        | BB   | 0.3834      | 4909.9       | 199.3        | 19.608 |
| Total  |               |      |             | 25040.2      | 1231.2       | 100%   |

(ee 60.78%)

### Regioselectivity Determination for Oxo-amination of Unsymmetrical Diaryl Cyclopropanes

The regioselectivities for reactions of unsymmetric diaryl cyclopropanes were determined by HPLC.

**Supplementary Figure 23.** HPLC Chromatography of 3-(4-methoxyphenyl)-1-phenyl-3-(1H-pyrazol-1-yl)propan-1-one (**3apa**)

(Chiralpak OD-H 250\*4.6 mm/5 um column, 15% isopropanol in hxane, 1.0 mL/min, 210 nm)

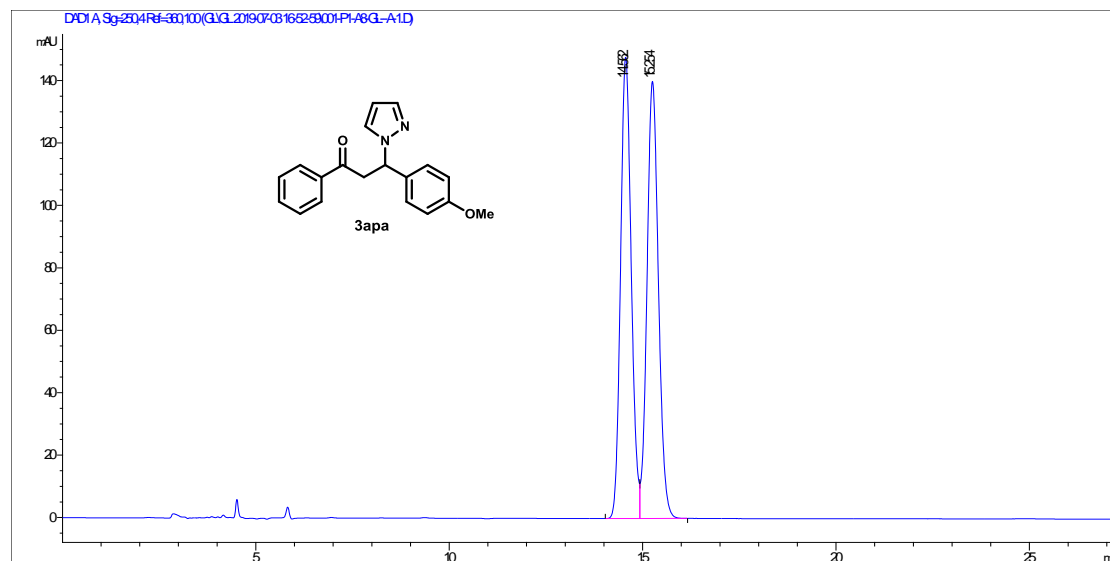

| Peak # | RetTime [min] | Type | Width [min] | Area [mAU*s] | Height [mAU] | Area % |
|--------|---------------|------|-------------|--------------|--------------|--------|
| 1      | 14.562        | BV   | 0.2978      | 2834.9       | 147.8        | 49.652 |
| 2      | 15.254        | VB   | 0.3175      | 2874.7       | 140          | 50.348 |
| Total  |               |      |             | 5709.6       | 287.8        | 100%   |

**Supplementary Figure 24.** HPLC Chromatography of 1-(4-methoxyphenyl)-3-phenyl-3-(1H-pyrazol-1-yl)propan-1-one (**3apa'**)

(Chiralpak OD-H 250\*4.6 mm/5 um column, 15% isopropanol in hxane, 1.0 mL/min, 210 nm)

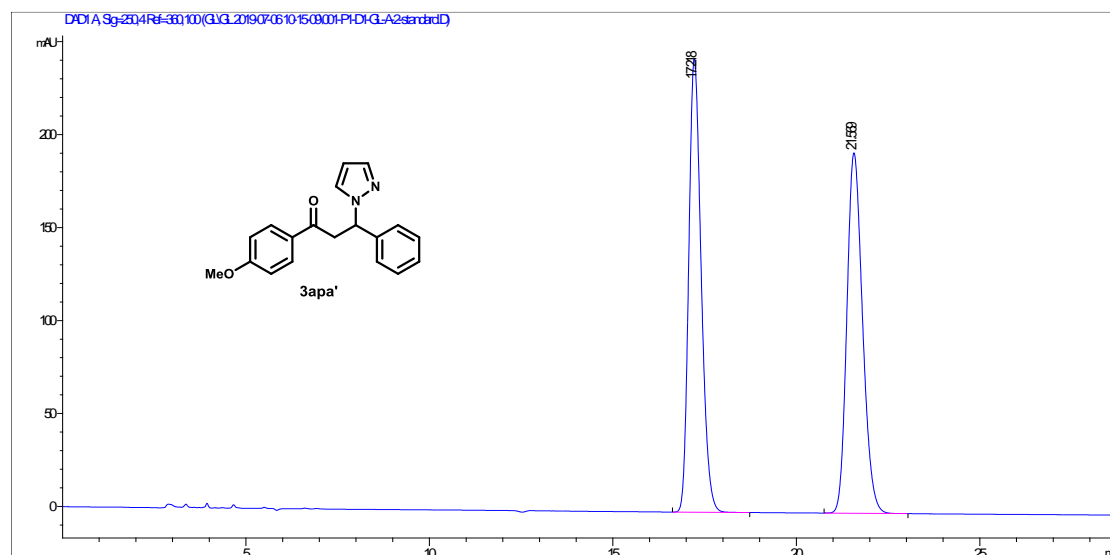

| Peak # | RetTime [min] | Type | Width [min] | Area [mAU*s] | Height [mAU] | Area % |
|--------|---------------|------|-------------|--------------|--------------|--------|
| 1      | 17.218        | BB   | 0.3619      | 5728.5       | 244          | 49.928 |
| 2      | 21.569        | BB   | 0.4597      | 5744.9       | 193.9        | 50.072 |
| Total  |               |      |             | 11473.4      | 437.9        | 100%   |

**Supplementary Figure 25.** HPLC Chromatography of reaction solution of **1ap**

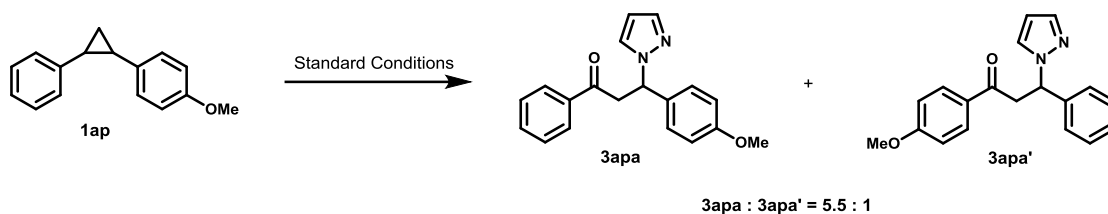

(Chiralpak OD-H 250\*4.6 mm/5 um column, 15% isopropanol in hxane, 1.0 mL/min, 210 nm)

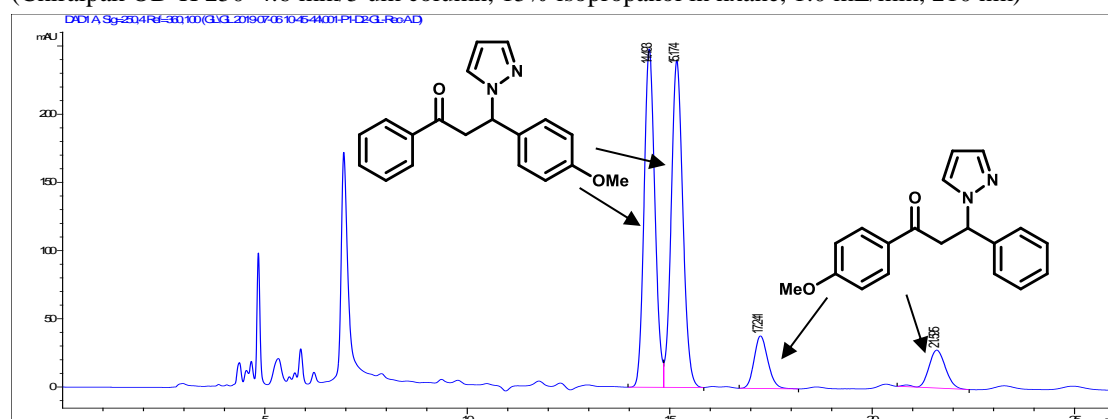

| Peak # | RetTime [min] | Type | Width [min] | Area [mAU*s] | Height [mAU] | Area % |
|--------|---------------|------|-------------|--------------|--------------|--------|
| 1      | 14.493        | VB   | 0.2892      | 4617.8       | 248.1        | 41.536 |
| 2      | 15.174        | BV   | 0.3091      | 4789.7       | 239.8        | 43.083 |
| 3      | 17.241        | BB   | 0.3651      | 908.4        | 38.5         | 8.171  |
| 4      | 21.595        | VB R | 0.4372      | 801.5        | 27.9         | 7.210  |
| Total  |               |      |             | 11117.4      | 554.3        | 100%   |

**Supplementary Figure 26.** HPLC Chromatography of 1-(4-methoxyphenyl)-3-(naphthalen-2-yl)-3-(1H-pyrazol-1-yl)propan-1-one (**3ara'**)

(Chiralpak OD-H 250\*4.6 mm/5 um column, 15% isopropanol in hxane, 1.0 mL/min, 210 nm)

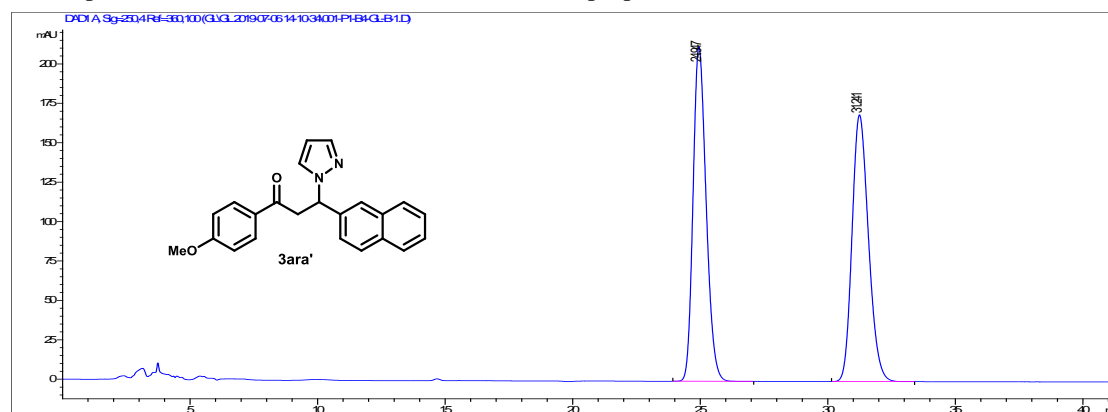

| Peak # | RetTime [min] | Type | Width [min] | Area [mAU*s] | Height [mAU] | Area % |
|--------|---------------|------|-------------|--------------|--------------|--------|
| 1      | 24.947        | BB   | 0.5517      | 7564.1       | 212.3        | 49.951 |
| 2      | 31.241        | BB   | 0.6987      | 7578.9       | 169.2        | 50.049 |
| Total  |               |      |             | 15143        | 381.5        | 100%   |

**Supplementary Figure 27.** HPLC Chromatography of 3-(4-methoxyphenyl)-1-(naphthalen-2-yl)-3-(1H-pyrazol-1-yl)propan-1-one (**3ara**)

(Chiralpak OD-H 250\*4.6 mm/5 um column, 15% isopropanol in hxane, 1.0 mL/min, 210 nm)

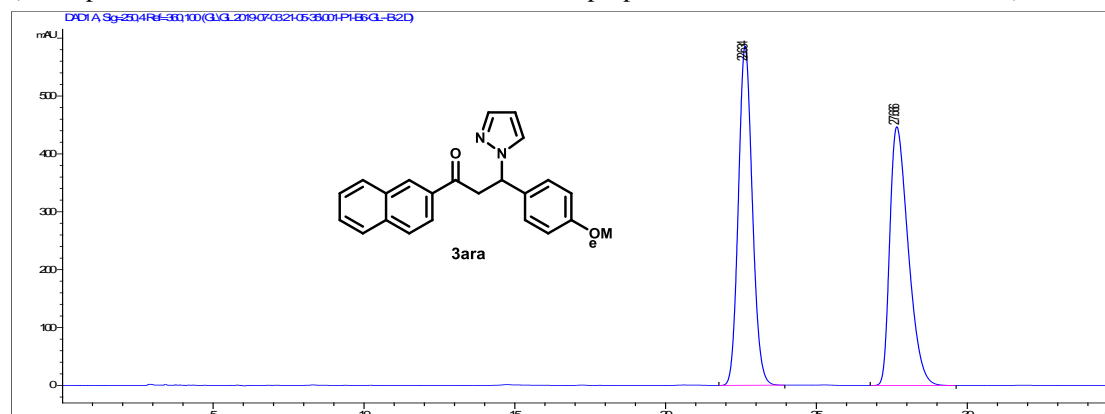

| Peak # | RetTime [min] | Type | Width [min] | Area [mAU*s] | Height [mAU] | Area % |
|--------|---------------|------|-------------|--------------|--------------|--------|
| 1      | 22.634        | BB   | 0.4991      | 18840.5      | 586          | 49.889 |
| 2      | 27.666        | BB   | 0.6561      | 18924.2      | 446.8        | 50.111 |
| Total  |               |      |             | 37764.7      | 1032.8       | 100%   |

**Supplementary Figure 28.** HPLC Chromatography of reaction solution of **1ar**

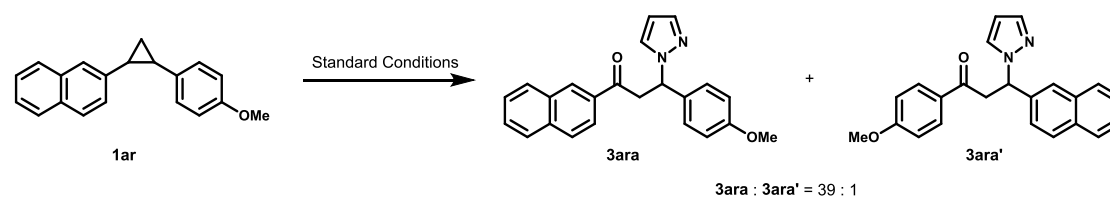

(Chiralpak OD-H 250\*4.6 mm/5 um column, 15% isopropanol in hxane, 1.0 mL/min, 210 nm)

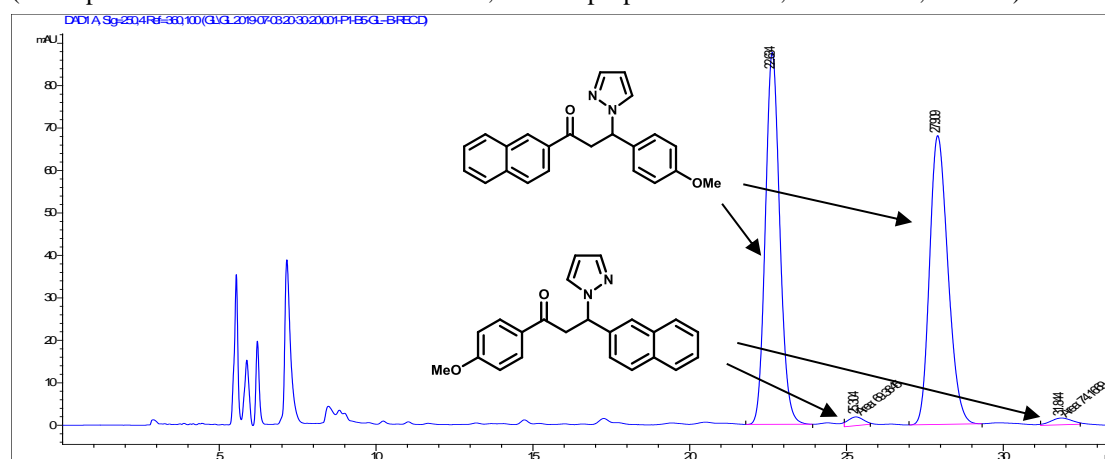

| Peak # | RetTime [min] | Type | Width [min] | Area [mAU*s] | Height [mAU] | Area % |
|--------|---------------|------|-------------|--------------|--------------|--------|
| 1      | 22.634        | BB   | 0.2892      | 2804.4       | 87.7         | 49.014 |
| 2      | 25.304        | MM   | 0.3091      | 69.4         | 2            | 1.213  |
| 3      | 27.909        | BB   | 0.3651      | 2773.7       | 68.1         | 48.478 |
| 4      | 31.844        | MM   | 0.4372      | 74.2         | 1.6          | 1.296  |
| Total  |               |      |             | 5721.7       | 159.4        | 100%   |

**Supplementary Figure 29.** HPLC Chromatography of 3-(4-methoxyphenyl)-3-(1H-pyrazol-1-yl)-1-(4-(trifluoromethyl)phenyl)propan-1-one (**3aqa**)

(Chiralpak OD-H 250\*4.6 mm/5 um column, 15% isopropanol in hxane, 1.0 mL/min, 210 nm)

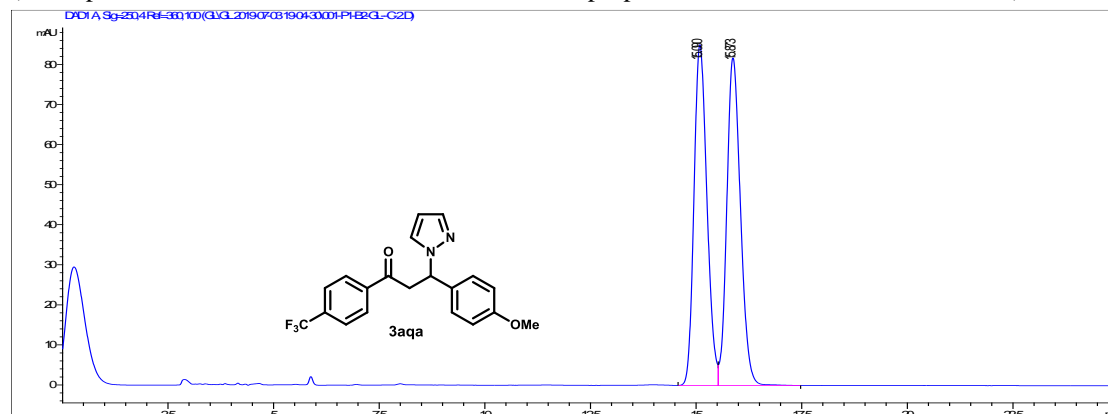

| Peak # | RetTime [min] | Type | Width [min] | Area [mAU*s] | Height [mAU] | Area % |
|--------|---------------|------|-------------|--------------|--------------|--------|
| 1      | 15.09         | BV   | 0.3308      | 1814.2       | 85.1         | 49.629 |
| 2      | 15.873        | VB   | 0.3487      | 1841.4       | 81.8         | 50.371 |
| Total  |               |      |             | 3655.6       | 166.9        | 100%   |

**Supplementary Figure 30.** HPLC Chromatography of 1-(4-methoxyphenyl)-3-(1H-pyrazol-1-yl)-3-(4-(trifluoromethyl)phenyl)propan-1-one (**3aqa'**)

(Chiralpak OD-H 250\*4.6 mm/5 um column, 15% isopropanol in hxane, 1.0 mL/min, 210 nm)

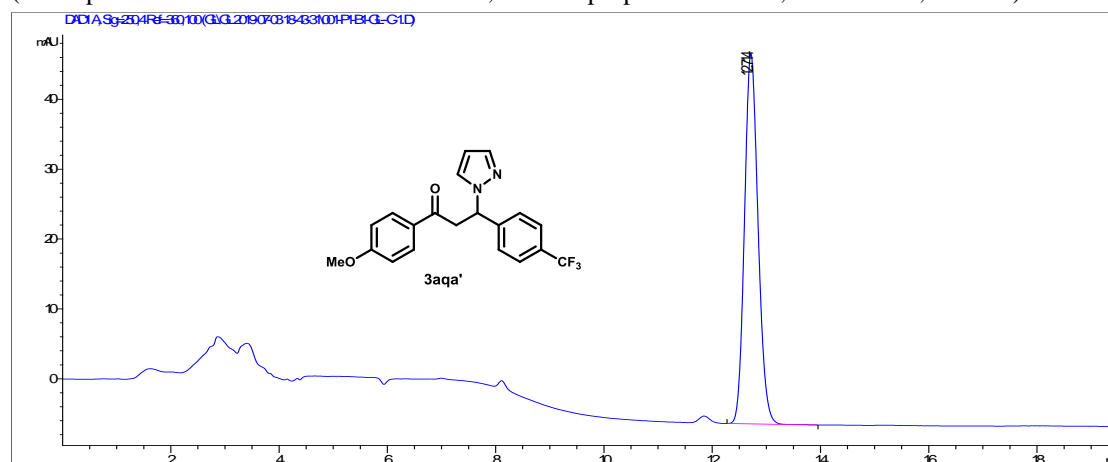

| Peak # | RetTime [min] | Type | Width [min] | Area [mAU*s] | Height [mAU] | Area % |
|--------|---------------|------|-------------|--------------|--------------|--------|
| 1      | 12.714        | BB   | 0.2692      | 923.3        | 53           | 100.00 |
| Total  |               |      |             | 923.3        | 53           | 100%   |

**Supplementary Figure 31. HPLC Chromatography of reaction solution of 1aq**

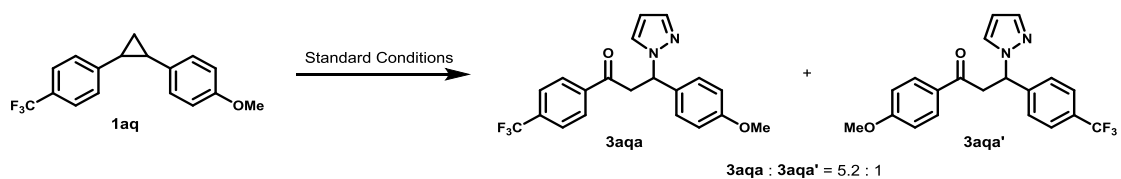

(Chiralpak OD-H 250\*4.6 mm/5 um column, 15% isopropanol in hexane, 1.0 mL/min, 210 nm)

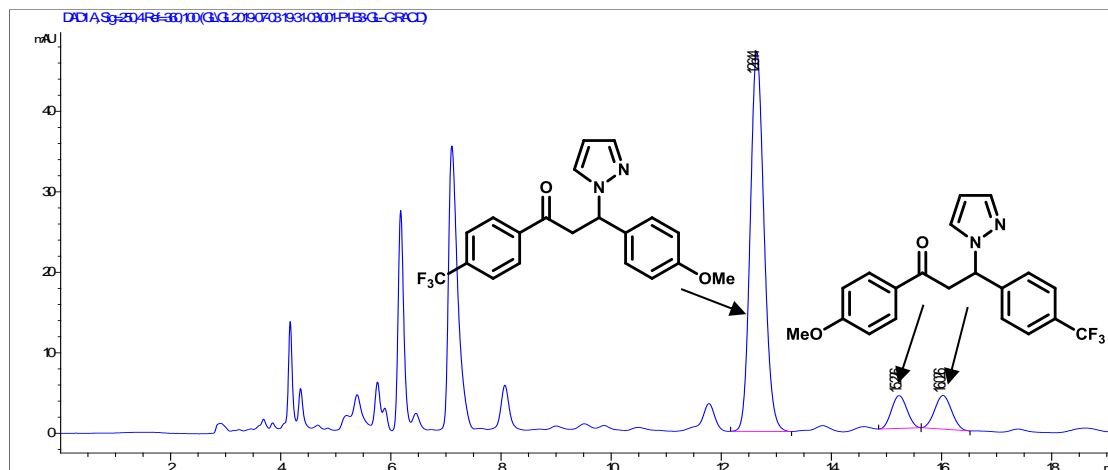

| Peak # | RetTime [min] | Type | Width [min] | Area [mAU*s] | Height [mAU] | Area % |
|--------|---------------|------|-------------|--------------|--------------|--------|
| 1      | 12.644        | BB   | 0.2698      | 824.4        | 47.2         | 83.085 |
| 2      | 15.226        | BB   | 0.305       | 79.1         | 4.1          | 7.976  |
| 3      | 16.026        | BB   | 0.3339      | 88.7         | 4.2          | 8.939  |
| Total  |               |      |             | 992.2        | 55.5         | 100%   |



## Characterization of Structurally Novel Compounds

### 1-Bromo-4-(2,2-dimethylcyclopropyl)benzene (1b)

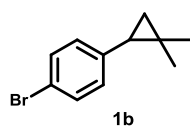

**<sup>1</sup>H NMR (400 MHz, Chloroform-*d*):**  $\delta$  7.38 (d,  $J$  = 8.4 Hz, 2H), 7.03 (d,  $J$  = 8.1 Hz, 2H), 1.82 (dd,  $J$  = 8.4, 6.2 Hz, 1H), 1.22 (s, 3H), 0.79 (s, 3H), 0.83 – 0.75 (m, 2H) ppm; **<sup>13</sup>C NMR (100 MHz, Chloroform-*d*):**  $\delta$  139.54, 130.98, 130.75, 119.29, 29.27, 27.41, 20.42, 19.26, 18.64 ppm; **HRMS (ESI, *m/z*):** calculated for  $[M+H]^+$ : 225.0279, found: 225.0254.

### 1-(*tert*-butyl)-4-(2,2-dimethylcyclopropyl)benzene (1d)

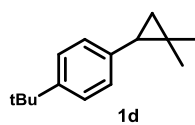

**<sup>1</sup>H NMR (400 MHz, Chloroform-*d*):**  $\delta$  7.30 (d,  $J$  = 8.3 Hz, 2H), 7.11 (d,  $J$  = 8.3 Hz, 2H), 1.88 – 1.83 (m, 1H), 1.34 (d,  $J$  = 1.8 Hz, 9H), 1.24 (s, 3H), 0.84 (s, 3H), 0.81 – 0.73 (m, 2H) ppm; **<sup>13</sup>C NMR (100 MHz, Chloroform-*d*):**  $\delta$  148.29, 137.35, 128.65, 124.83, 34.44, 31.55, 29.44, 27.62, 20.52, 18.98, 18.56 ppm; **HRMS (ESI, *m/z*):** calculated for  $[M+H]^+$ : 203.1800, found: 203.1793.

### 4-(2,2-dimethylcyclopropyl)-1,1'-biphenyl (1h)

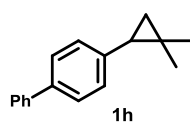

**<sup>1</sup>H NMR (400 MHz, Chloroform-*d*):**  $\delta$  7.57 (d,  $J$  = 7.6 Hz, 2H), 7.49 (d,  $J$  = 7.8 Hz, 2H), 7.39 (t,  $J$  = 7.6 Hz, 2H), 7.29 (t,  $J$  = 7.4 Hz, 1H), 7.21 (d,  $J$  = 7.8 Hz, 2H), 1.89 (t,  $J$  = 7.1 Hz, 1H), 1.23 (s, 3H), 0.83 (s, 3H), 0.82 – 0.78 (m, 1H) ppm; **<sup>13</sup>C NMR (100 MHz, Chloroform-*d*):**  $\delta$  141.19, 139.64, 138.39, 129.38, 128.79, 127.03, 126.66, 29.61, 27.59, 20.49, 19.36, 18.67 ppm; **HRMS (ESI, *m/z*):** calculated for  $[M+H]^+$ : 223.1487, found: 223.1479.

### 1-cyclopropyl-4-(2,2-dimethylcyclopropyl)benzene (1i)

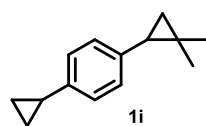

**<sup>1</sup>H NMR (400 MHz, Chloroform-*d*):**  $\delta$  7.06 (d,  $J$  = 8.1 Hz, 2H), 6.98 (d,  $J$  = 8.2 Hz, 2H), 1.91 – 1.85 (m, 1H), 1.84 (dd,  $J$  = 7.4, 5.8 Hz, 1H), 1.22 (s, 3H), 0.97 – 0.91 (m, 2H), 0.80 (s, 3H), 0.76 (d,  $J$  = 1.3 Hz, 1H), 0.75 (d,  $J$  = 3.6 Hz, 1H), 0.70 – 0.65 (m, 2H) ppm; **<sup>13</sup>C NMR (100 MHz, Chloroform-*d*):**  $\delta$  141.06, 137.45, 128.94, 125.25, 29.46, 27.54, 20.50, 18.92, 18.46, 15.14, 9.17, 9.14 ppm; **HRMS (ESI, *m/z*):** calculated for  $[M+H]^+$ : 187.487, found: 187.1484.

### 4-(2,2-dimethylcyclopropyl)-2-fluoro-1-methoxybenzene (1j)

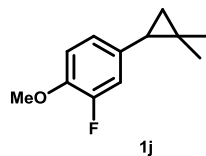

**<sup>1</sup>H NMR (400 MHz, Chloroform-*d*):**  $\delta$  6.92 – 6.84 (m, 1H), 3.86 (s, 1H), 1.80 (dd,  $J$  = 8.4, 5.9 Hz, 1H), 1.20 (s, 1H), 0.79 (s, 1H), 0.75 (dd,  $J$  = 8.5, 4.8 Hz, 1H), 0.70 (t,  $J$  = 5.3 Hz, 1H) ppm; **<sup>13</sup>C NMR (100 MHz, Chloroform-*d*):**  $\delta$  151.97 (d,  $J$  = 244.5 Hz), 145.46 (d,  $J$  = 10.8 Hz), 133.65 (d,  $J$  = 6.3 Hz), 124.40 (d,  $J$  = 3.3 Hz), 116.64 (d,  $J$  = 17.8 Hz), 112.93 (d,  $J$  = 2.3 Hz), 56.27, 28.81 (d,  $J$  = 1.6 Hz), 27.22, 20.38, 18.89, 18.55 ppm; **HRMS (ESI, *m/z*):** calculated for  $[M+H]^+$ : 195.185, found: 195.1179.

### 2-chloro-4-(2,2-dimethylcyclopropyl)-1-methoxybenzene (1k)

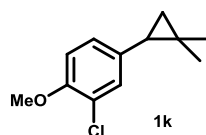

**<sup>1</sup>H NMR (400 MHz, Chloroform-*d*):**  $\delta$  7.13 (d,  $J$  = 2.1 Hz, 1H), 6.95 (dd,  $J$  = 8.4, 2.1 Hz, 1H), 6.77 (d,  $J$  = 8.4 Hz, 1H), 3.81 (s, 3H), 1.74 (dd,  $J$  = 8.4, 5.9 Hz, 1H), 1.15 (s, 3H), 0.74 (s, 3H), 0.70 (dd,  $J$  = 8.5, 4.8 Hz, 1H), 0.66 (t,  $J$  = 5.3 Hz, 1H) ppm; **<sup>13</sup>C NMR (100 MHz, Chloroform-*d*):**  $\delta$  153.07, 133.79, 130.83, 128.18, 121.81, 111.73, 56.20, 28.74,

27.31, 20.56, 18.91, 18.61 ppm; **HRMS (ESI, m/z)**: calculated for  $[M+H]^+$ : 211.0890, found: 211.0884.

#### 2-bromo-4-(2,2-dimethylcyclopropyl)-1-methoxybenzene (1l)

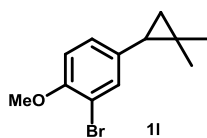

**$^1\text{H}$  NMR (400 MHz, Chloroform-*d*)**:  $\delta$  7.35 (d,  $J = 0.7$  Hz, 1H), 7.05 (dd,  $J = 8.4, 0.8$  Hz, 1H), 6.80 (d,  $J = 8.4$  Hz, 1H), 3.87 (s, 3H), 1.84 – 1.74 (m, 1H), 1.20 (s, 3H), 0.78 (s, 3H), 0.75 (dd,  $J = 8.4, 4.8$  Hz, 1H), 0.70 (t,  $J = 5.2$  Hz, 1H) ppm;  **$^{13}\text{C}$  NMR (100 MHz, Chloroform-*d*)**:  $\delta$  153.82, 134.18, 133.78, 128.83, 111.40, 110.98, 56.24, 28.53, 27.21,

20.49, 18.87, 18.52 ppm; **HRMS (ESI, m/z)**: calculated for  $[M+H]^+$ : 255.0385, found: 255.0379.

#### 4-(2,2-dimethylcyclopropyl)-1-methoxy-2-methylbenzene (1m)

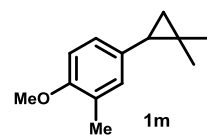

**$^1\text{H}$  NMR (400 MHz, Chloroform-*d*)**:  $\delta$  6.97 (dd,  $J = 2.0, 1.2$  Hz, 1H), 6.96 – 6.93 (m, 1H), 6.74 (d,  $J = 8.1$  Hz, 1H), 3.82 (s, 3H), 2.22 (s, 3H), 1.80 (t,  $J = 7.1$  Hz, 1H), 1.22 (s, 3H), 0.81 (s, 3H), 0.75 – 0.70 (m, 2H) ppm;  **$^{13}\text{C}$  NMR (100 MHz, Chloroform-*d*)**:  $\delta$  155.77,

131.92, 131.54, 126.83, 125.80, 109.41, 55.32, 28.93, 27.38, 20.49, 18.48, 18.31, 16.31 ppm; **HRMS (ESI, m/z)**: calculated for  $[M+H]^+$ : 191.1436, found: 191.1435.

#### Methyl 5-(2,2-dimethylcyclopropyl)-2-methoxybenzoate (1o)

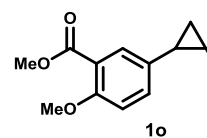

**$^1\text{H}$  NMR (400 MHz, Chloroform-*d*)**:  $\delta$  7.58 (d,  $J = 2.3$  Hz, 1H), 7.26 – 7.23 (m, 1H), 6.88 (d,  $J = 8.5$  Hz, 1H), 3.88 (d,  $J = 3.4$  Hz, 6H), 1.81 (dd,  $J = 8.8, 6.6$  Hz, 1H), 1.20 (s, 3H), 0.76 (s, 3H), 0.75 – 0.73 (m, 1H) ppm;  **$^{13}\text{C}$  NMR (100 MHz, Chloroform-*d*)**:  $\delta$

167.06, 157.30, 134.00, 132.26, 132.14, 119.48, 111.79, 56.19, 52.09, 28.68, 27.30, 20.56, 18.82, 18.54 ppm; **HRMS (ESI, m/z)**: calculated for  $[M+H]^+$ : 235.1334, found: 235.1327.

#### 4-(2,2-dimethylcyclopropyl)-1,2-dimethylbenzene (1p)

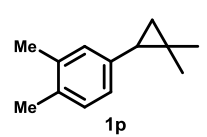

**$^1\text{H}$  NMR (400 MHz, Chloroform-*d*)**:  $\delta$  6.94 (d,  $J = 8.7$  Hz, 2H), 6.73 (d,  $J = 8.1$  Hz, 1H), 3.81 (s, 3H), 2.21 (s, 3H), 1.87 – 1.68 (m, 1H), 1.21 (s, 3H), 0.80 (s, 3H), 0.72 (d,  $J = 1.3$  Hz, 1H), 0.70 (s, 1H) ppm;

**$^{13}\text{C}$  NMR (100 MHz, Chloroform-*d*)**:  $\delta$  137.67, 135.86, 133.53,

130.41, 129.14, 126.16, 29.38, 20.42, 19.84, 19.35, 18.73, 18.27 ppm; **HRMS (ESI, m/z)**: calculated for  $[M+H]^+$ : 175.1487, found: 175.1482.

#### 2-(2,2-dimethylcyclopropyl)naphthalene (1q)

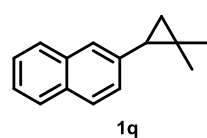

**$^1\text{H}$  NMR (400 MHz, Chloroform-*d*)**:  $\delta$  7.85 – 7.79 (m, 2H), 7.78 (d,  $J = 8.5$  Hz, 1H), 7.59 (s, 1H), 7.50 – 7.41 (m, 2H), 7.39 (dd,  $J = 8.4, 1.7$  Hz, 1H), 2.07 (dd,  $J = 8.3, 5.9$  Hz, 1H), 1.31 (s, 3H), 1.02 – 0.96 (m, 1H), 0.89 (dd,  $J = 8.4, 4.7$  Hz, 1H), 0.85 (s, 3H) ppm;  **$^{13}\text{C}$  NMR**

**(100 MHz, Chloroform-*d*)**:  $\delta$  138.14, 133.46, 131.95, 128.41, 127.59, 127.47, 127.26, 126.48, 125.82, 125.00, 30.06, 27.53, 20.42, 19.40, 18.51 ppm; **HRMS (ESI, m/z)**: calculated for  $[M+Na]^+$ : 219.1150, found: 219.1139.

### 5-(2,2-dimethylcyclopropyl)benzofuran (1r)

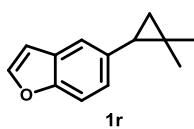

<sup>1</sup>H NMR (400 MHz, Chloroform-*d*): δ 7.58 (d, *J* = 2.2 Hz, 1H), 7.40 (d, *J* = 8.5 Hz, 1H), 7.37 – 7.36 (m, 1H), 7.13 (dd, *J* = 8.5, 1.8 Hz, 1H), 6.72 – 6.69 (m, 1H), 1.97 (dd, *J* = 8.3, 6.0 Hz, 1H), 1.25 (s, 3H), 0.82 (d, *J* = 2.1 Hz, 1H), 0.79 (s, 3H) ppm; <sup>13</sup>C NMR (100 MHz, Chloroform-*d*): δ 153.60, 145.05, 134.90, 127.28, 126.02, 120.95, 110.62, 106.52, 29.68, 27.47, 20.64, 18.71, 18.66 ppm; HRMS (ESI, *m/z*): calculated for [M+H]<sup>+</sup>: 187.1123, found: 187.1118.

### 5-(2,2-dimethylcyclopropyl)-1a,6b-dihydro-1H-cyclopropa[*b*]benzofuran (1s)

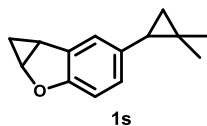

<sup>1</sup>H NMR (400 MHz, Chloroform-*d*): δ 7.13 (dd, *J* = 8.3, 1.8 Hz, 1H), 6.87 (dddd, *J* = 10.1, 8.2, 1.9, 0.7 Hz, 1H), 6.71 (dd, *J* = 8.2, 2.2 Hz, 1H), 4.77 (tt, *J* = 5.4, 2.0 Hz, 1H), 2.57 (dddd, *J* = 9.1, 5.6, 4.0, 1.8 Hz, 1H), 1.81 (ddd, *J* = 8.2, 6.0, 1.9 Hz, 1H), 1.20 (s, 3H), 0.96 (dddd, *J* = 8.8, 6.4, 5.5, 1.0 Hz, 1H), 0.79 (s, 3H), 0.73 (td, *J* = 4.2, 3.6, 1.6 Hz, 1H), 0.70 (dd, *J* = 5.8, 2.3 Hz, 1H), 0.31 (ddt, *J* = 6.3, 4.1, 2.1 Hz, 1H) ppm; <sup>13</sup>C NMR (100 MHz, Chloroform-*d*): δ 157.52 (d, *J* = 9.4 Hz), 132.54 (d, *J* = 2.0 Hz), 130.90 (d, *J* = 3.4 Hz), 127.60 (d, *J* = 31.8 Hz), 124.54 (d, *J* = 29.0 Hz), 109.55 (d, *J* = 5.2 Hz), 61.73 (d, *J* = 11.2 Hz), 29.33, 27.43, 20.62 (d, *J* = 1.1 Hz), 19.86 (d, *J* = 5.0 Hz), 18.59 (d, *J* = 1.0 Hz), 10.35 ppm; HRMS (ESI, *m/z*): calculated for [M+H]<sup>+</sup>: 201.1279, found: 201.1270.

### 2-(2,2-dimethylcyclopropyl)dibenzo[*b,e*]oxepin-11(6H)-one (1t)

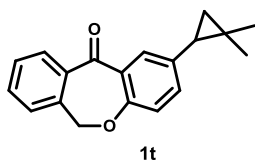

<sup>1</sup>H NMR (400 MHz, Chloroform-*d*): δ 8.00 (d, *J* = 2.3 Hz, 1H), 7.90 (dd, *J* = 7.7, 1.3 Hz, 1H), 7.55 (td, *J* = 7.4, 1.5 Hz, 1H), 7.47 (td, *J* = 7.6, 1.3 Hz, 1H), 7.36 (dd, *J* = 7.5, 1.3 Hz, 1H), 7.29 (dd, *J* = 8.4, 2.4 Hz, 1H), 6.96 (d, *J* = 8.4 Hz, 1H), 5.17 (s, 2H), 1.92 – 1.80 (m, 1H), 1.23 (s, 3H), 0.86 – 0.75 (m, 2H), 0.80 (s, 4H) ppm; <sup>13</sup>C NMR (100 MHz, Chloroform-*d*): δ 191.39, 159.45, 140.65, 136.34, 135.67, 134.21, 132.63, 131.50, 129.46, 129.18, 127.73, 124.74, 120.11, 73.58, 28.77, 27.25, 20.44, 18.94, 18.54 ppm; HRMS (ESI, *m/z*): calculated for [M+H]<sup>+</sup>: 279.1385, found: 279.1379.

### 1-(2,2-diethylcyclopropyl)-4-methoxybenzene (1v)

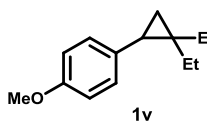

<sup>1</sup>H NMR (400 MHz, Chloroform-*d*): δ 7.10 (d, *J* = 8.6 Hz, 2H), 6.82 (d, *J* = 8.6 Hz, 2H), 3.79 (s, 3H), 1.85 (dd, *J* = 8.3, 6.1 Hz, 1H), 1.61 (dd, *J* = 14.0, 7.1 Hz, 1H), 1.24 – 1.13 (m, 2H), 0.99 (t, *J* = 7.4 Hz, 3H), 0.82 – 0.74 (m, 4H), 0.73 – 0.66 (m, 2H) ppm; <sup>13</sup>C NMR (100 MHz, Chloroform-*d*): δ 157.52, 132.12, 130.00, 113.22, 55.22, 29.42, 28.68, 28.54, 22.82, 16.65, 10.85, 10.52 ppm; HRMS (ESI, *m/z*): calculated for [M+H]<sup>+</sup>: 205.1592, found: 205.1590.

### 2'-(4-methoxyphenyl)-1,1':1'',1''-tercyclopropane (1w)

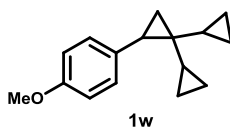

<sup>1</sup>H NMR (400 MHz, Chloroform-*d*): δ 7.10 (d, *J* = 8.5 Hz, 2H), 6.80 (d, *J* = 8.7 Hz, 2H), 3.79 (s, 3H), 1.78 (dd, *J* = 8.9, 6.0 Hz, 1H), 1.08 (tt, *J* = 8.3, 5.3 Hz, 1H), 0.88 (t, *J* = 6.7 Hz, 1H), 0.56 (t, *J* = 5.5 Hz, 1H), 0.54 – 0.46 (m, 2H), 0.39 – 0.34 (m, 2H), 0.30 (ddd, *J* = 14.6, 5.8, 2.9 Hz, 2H), 0.11 – 0.07 (m, 2H), 0.06 – 0.02 (m, 1H) ppm; <sup>13</sup>C

**NMR (100 MHz, Chloroform-*d*):**  $\delta$  157.56, 132.03, 130.31, 113.25, 55.30, 29.81, 27.25, 25.70, 15.97, 14.43, 12.04, 3.32, 2.18 (d,  $J = 4.0$  Hz), 1.64 ppm; **HRMS (ESI, *m/z*):** calculated for  $[M+H]^+$ : 229.1592, found: 229.1584.

**1-(4-methoxyphenyl)spiro[2.4]heptane (1z)**

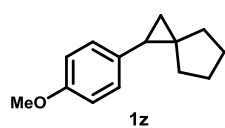

**$^1\text{H}$  NMR (400 MHz, Chloroform-*d*):**  $\delta$  7.02 (d,  $J = 8.6$  Hz, 2H), 6.82 (d,  $J = 8.7$  Hz, 2H), 3.79 (s, 3H), 1.93 (dd,  $J = 8.7, 6.0$  Hz, 1H), 1.65 (dtt,  $J = 12.0, 8.3, 3.7$  Hz, 4H), 1.61 – 1.53 (m, 2H), 1.38 – 1.28 (m, 1H), 1.27 – 1.18 (m, 1H), 1.00 (dd,  $J = 8.7, 4.8$  Hz, 1H), 0.95 – 0.85 (m, 1H) ppm;  **$^{13}\text{C}$  NMR (100 MHz, Chloroform-*d*):**  $\delta$  157.54, 133.00, 129.07, 113.49, 55.34, 38.04, 30.67, 30.11, 29.11, 26.52, 26.48, 18.22 ppm; **HRMS (ESI, *m/z*):** calculated for  $[M+H]^+$ : 203.1436, found: 203.1432.

**1-(4-methoxyphenyl)spiro[2.5]octane (1aa)**

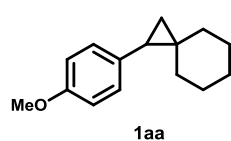

**$^1\text{H}$  NMR (400 MHz, Chloroform-*d*):**  $\delta$  7.12 (d,  $J = 8.8$  Hz, 2H), 6.82 (d,  $J = 8.7$  Hz, 2H), 3.80 (s, 3H), 1.82 (dd,  $J = 8.2, 5.9$  Hz, 1H), 1.59 (q,  $J = 7.1, 6.6$  Hz, 2H), 1.45 (dq,  $J = 13.8, 5.8$  Hz, 4H), 1.30 (dd,  $J = 10.2, 5.4$  Hz, 2H), 1.12 – 1.01 (m, 2H), 0.76 (t,  $J = 5.2$  Hz, 1H), 0.69 (dd,  $J = 8.4, 4.7$  Hz, 1H) ppm;  **$^{13}\text{C}$  NMR (100 MHz, Chloroform-*d*):**  $\delta$  157.60, 131.98, 129.89, 113.28, 55.31, 38.02, 30.58, 28.71, 26.41, 26.29, 25.96, 25.13, 16.75 ppm; **HRMS (ESI, *m/z*):** calculated for  $[M+H]^+$ : 217.1592, found: 217.1586.

**2-bromo-1-methoxy-4-(2-methylcyclopropyl)benzene (1ac)**

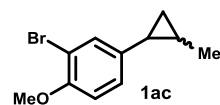

**Trans isomer  $^1\text{H}$  NMR (400 MHz, Chloroform-*d*):**  $\delta$  7.21 (d,  $J = 2.2$  Hz, 1H), 6.95 (dd,  $J = 8.4, 2.2$  Hz, 1H), 6.78 (d,  $J = 8.5$  Hz, 1H), 3.85 (s, 3H), 1.50 (dt,  $J = 9.0, 4.7$  Hz, 1H), 1.16 (d,  $J = 5.9$  Hz, 3H), 0.98 – 0.92 (m, 1H), 0.83 – 0.79 (m, 1H), 0.69 (dt,  $J = 8.5, 5.2$  Hz, 1H) ppm;  **$^{13}\text{C}$  NMR (100 MHz, Chloroform-*d*):**  $\delta$  153.63, 134.08, 130.49, 125.68, 111.87, 111.42, 56.35, 23.17, 19.01, 17.54, 17.10 ppm.

**Cis isomer  $^1\text{H}$  NMR (400 MHz, Chloroform-*d*):**  $\delta$  7.38 (d,  $J = 2.1$  Hz, 1H), 7.10 – 7.07 (m, 1H), 6.81 (d,  $J = 8.4$  Hz, 1H), 3.87 (s, 3H), 1.99 (td,  $J = 8.6, 5.8$  Hz, 1H), 1.09 (dtd,  $J = 14.7, 6.0, 2.6$  Hz, 1H), 1.00 – 0.98 (m, 1H), 0.78 (d,  $J = 6.2$  Hz, 3H), 0.48 (q,  $J = 5.5$  Hz, 1H) ppm;  **$^{13}\text{C}$  NMR (100 MHz, Chloroform-*d*):**  $\delta$  153.91, 137.76, 133.33, 129.21, 111.46, 110.99, 56.25, 19.96, 13.77, 12.46, 11.05 ppm; **HRMS (ESI, *m/z*):** calculated for  $[M+H]^+$ : 241.0228, found: 241.0220.

**4-(2-(3-bromo-4-methoxyphenyl)cyclopropyl)butyl acetate (1ad)**

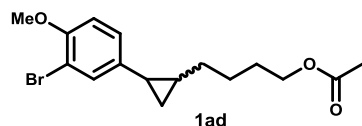

Only spectra of the major isomer is provided.  
**Trans isomer  $^1\text{H}$  NMR (400 MHz, Chloroform-*d*):**  $\delta$  7.21 (d,  $J = 2.2$  Hz, 1H), 6.96 (dd,  $J = 8.4, 2.2$  Hz, 1H), 6.78 (d,  $J = 8.4$  Hz, 1H), 4.06 (t,  $J = 6.7$  Hz, 2H), 3.85 (s, 3H), 2.05 (s, 3H), 1.66 (dt,  $J = 14.5, 6.8$  Hz, 2H), 1.54 (dd,  $J = 8.7, 4.5$  Hz, 1H), 1.54 – 1.45 (m, 2H), 1.44 – 1.33 (m, 2H), 0.98 – 0.89 (m, 1H), 0.81 (dt,  $J = 8.4, 4.9$  Hz, 1H), 0.72 (dt,  $J = 8.6, 5.2$  Hz, 1H) ppm;  **$^{13}\text{C}$  NMR (100 MHz, Chloroform-*d*):**  $\delta$  171.29, 153.68, 137.52, 130.51, 125.80, 111.85, 111.47, 64.54, 56.35, 33.87, 28.38, 25.76, 23.17, 22.07, 21.07, 15.72 ppm; **HRMS (ESI, *m/z*):** calculated for  $[M+Na]^+$ : 363.0572, found 363.0557.

#### 4-(2-(3-bromo-4-methoxyphenyl)cyclopropyl)butyl dimethylcarbamate (1ae)

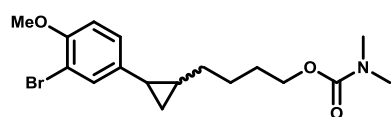

(*Trans* : *Cis* = 1.0 : 0.1)

Only spectra of the major isomer is provided.

***Trans* isomer  $^1\text{H}$  NMR (400 MHz, Chloroform-*d*):**  $\delta$  7.20 (d,  $J = 2.2$  Hz, 1H), 6.95 (dd,  $J = 8.5, 2.2$  Hz, 1H), 6.78 (d,  $J = 8.4$  Hz, 1H), 4.06 (t,  $J = 6.6$  Hz, 2H), 3.85 (s, 3H), 2.91 (s, 3H), 2.89 (s, 3H),

1.70 – 1.61 (m, 2H), 1.54 (t,  $J = 4.5$  Hz, 1H), 1.53 – 1.44 (m, 2H), 1.42 – 1.36 (m, 2H), 0.98 – 0.89 (m, 1H), 0.81 (dt,  $J = 8.4, 4.9$  Hz, 1H), 0.75 – 0.68 (m, 1H) ppm;  $^{13}\text{C}$  NMR (100 MHz, Chloroform-*d*):  $\delta$  156.83, 153.65, 137.59, 130.50, 125.78, 111.85, 111.45, 65.33, 56.35, 33.90, 28.87, 25.78, 23.28, 22.09, 15.72 ppm; HRMS (ESI,  $m/z$ ): calculated for  $[\text{M}+\text{H}]^+$ : 370.1018, found 370.1009.

#### (4-(2-(3-bromo-4-methoxyphenyl)cyclopropyl)butoxy)(tert-butyl)dimethylsilane (1af)

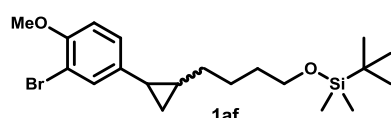

(*Trans* : *Cis* = 1.0 : 0.1)

Only spectra of the major isomer is provided.

***Trans* isomer  $^1\text{H}$  NMR (400 MHz, Chloroform-*d*):**  $\delta$  7.21 (d,  $J = 2.2$  Hz, 1H), 6.96 (dd,  $J = 8.4, 2.2$  Hz, 1H), 6.78 (d,  $J = 8.4$  Hz, 1H), 3.85 (s, 3H), 3.61 (t,  $J = 6.4$

Hz, 2H), 1.56 (d,  $J = 8.6$  Hz, 1H), 1.55 – 1.50 (m, 2H), 1.47 (ddd,  $J = 13.8, 7.0, 4.3$  Hz, 2H), 1.41 – 1.34 (m, 2H), 0.89 (s, 9H), 0.80 (dt,  $J = 8.5, 4.9$  Hz, 1H), 0.71 (dt,  $J = 8.6, 5.2$  Hz, 1H), 0.05 (s, 6H) ppm;  $^{13}\text{C}$  NMR (100 MHz, Chloroform-*d*):  $\delta$  152.58, 136.70, 129.50, 124.76, 110.81, 110.41, 62.19, 55.31, 33.05, 31.60, 24.96, 24.59, 22.38, 21.05, 14.66, -0.00, -6.28 ppm; HRMS (ESI,  $m/z$ ): calculated for  $[\text{M}+\text{H}]^+$ : 413.1511, found 413.1506.

#### 1-(2-(3-bromopropyl)cyclopropyl)-4-methoxybenzene (1ag)

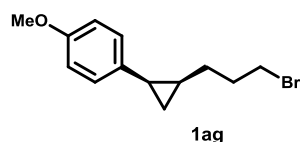

1ag

$^1\text{H}$  NMR (400 MHz, Chloroform-*d*):  $\delta$  7.10 (d,  $J = 8.5$  Hz, 2H), 6.82 (d,  $J = 8.7$  Hz, 2H), 3.79 (s, 3H), 3.38 – 3.16 (m, 2H), 2.08 (q,  $J = 8.3$  Hz, 1H), 1.90 – 1.78 (m, 2H), 1.31 – 1.20 (m, 1H), 1.10 – 1.00 (m, 2H), 0.97 – 0.89 (m, 1H), 0.61 (q,  $J = 5.1$  Hz, 1H) ppm;  $^{13}\text{C}$  NMR (100 MHz, Chloroform-*d*):  $\delta$  153.07, 133.79, 130.83, 128.18, 121.81, 111.73, 56.20, 28.74, 27.31, 20.56, 18.91, 18.61 ppm; HRMS (ESI,  $m/z$ ): calculated for  $[\text{M}+\text{H}]^+$ : 268.0463, found: 268.0456.

#### methyl 9-(2-(4-methoxyphenyl)cyclopropyl)nonanoate (1ah)

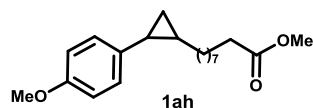

1ah

Only spectra of the major isomer is provided.

***Cis* isomer  $^1\text{H}$  NMR (400 MHz, Chloroform-*d*):**  $\delta$  7.10 (d,  $J = 8.3$  Hz, 2H), 6.81 (d,  $J = 8.7$  Hz, 2H), 3.78 (s, 3H), 3.66 (s, 3H), 2.31 – 2.25 (m, 2H), 2.03 (td,  $J = 8.5, 5.9$  Hz, 1H), 1.58 (p,  $J = 7.5$  Hz, 2H), 1.31 – 1.12 (m, 11H), 1.04 – 0.96 (m, 1H), 0.93 – 0.90 (m, 1H), 0.87 – 0.81 (m, 1H), 0.54 (q,  $J = 5.6$  Hz, 1H) ppm;  $^{13}\text{C}$  NMR (100 MHz, Chloroform-*d*):  $\delta$  174.43, 157.66, 131.74, 130.05, 113.31, 55.28, 51.52, 34.19, 29.42, 29.23, 29.20, 28.66, 25.03, 20.18, 18.80, 9.72 ppm; HRMS (ESI,  $m/z$ ): calculated for  $[\text{M}+\text{H}]^+$ : 319.2268, found: 319.2263.

### 1-(2-benzylcyclopropyl)-4-methoxybenzene (1ai)

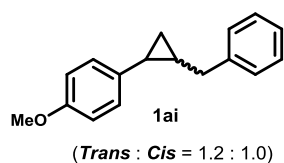

**Cis isomer  $^1\text{H}$  NMR (400 MHz, Chloroform-*d*):** (resolved signals only)  $\delta$  7.33 – 7.15 (m, 5H), 6.99 – 6.95 (m, 2H), 6.81 – 6.76 (m, 2H), 3.76 (s, 3H), 2.77 (dd,  $J = 14.8, 6.7$  Hz, 1H), 2.67 (dd,  $J = 14.8, 6.9$  Hz, 1H), 1.75 (dt,  $J = 8.6, 4.9$  Hz, 1H), 1.31 – 1.20 (m, 1H), 0.89 (ddt,  $J = 16.2, 8.5, 5.0$  Hz, 2H) ppm;

**$^{13}\text{C}$  NMR (100 MHz, Chloroform-*d*):**  $\delta$  157.60, 141.50, 135.35, 130.15, 128.38, 126.85, 125.98, 113.80, 55.34, 40.02, 23.59, 22.61, 15.48 ppm.

**Trans isomer  $^1\text{H}$  NMR (400 MHz, Chloroform-*d*):** (resolved signals only)  $\delta$  7.33 – 7.15 (m, 5H), 7.09 (dd,  $J = 7.7, 1.2$  Hz, 2H), 6.85 – 6.81 (m, 2H), 3.76 (s, 3H), 2.50 (dd,  $J = 15.0, 6.3$  Hz, 1H), 2.23 – 2.10 (m, 2H), 1.35 (qt,  $J = 8.6, 6.1$  Hz, 1H), 1.05 (td,  $J = 8.4, 5.1$  Hz, 1H), 0.77 (q,  $J = 5.6$  Hz, 1H) ppm;  **$^{13}\text{C}$  NMR (100**

**MHz, Chloroform-*d*):**  $\delta$  157.87, 142.20, 131.13, 128.37, 128.35, 128.17, 125.68, 113.43, 55.28, 34.61, 20.52, 19.60, 9.95 ppm; **HRMS (ESI,  $m/z$ ):** calculated for  $[\text{M}+\text{H}]^+$ : 239.1436, found: 239.1435.

### 1-methoxy-4-(2-phenethylcyclopropyl)benzene (1aj)

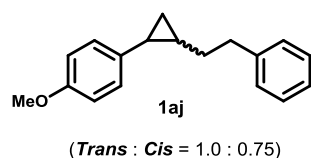

**Cis isomer  $^1\text{H}$  NMR (400 MHz, Chloroform-*d*):** (resolved signals only)  $\delta$  7.30 – 7.13 (m, 5H), 7.07 – 7.00 (m, 2H), 6.83 (d,  $J = 8.7$  Hz, 2H), 3.80 (s, 3H), 2.56 (ddd,  $J = 8.8, 6.8, 1.9$  Hz, 2H), 2.10 (td,  $J = 8.6, 5.8$  Hz, 1H), 1.41 (ddd,  $J = 13.9, 8.6, 7.0$  Hz, 1H), 1.26 (ddd,  $J = 14.1, 6.9, 1.5$  Hz, 1H), 1.14 – 1.03 (m, 1H), 0.95 (td,  $J = 8.4, 4.9$  Hz, 1H), 0.61 (q,  $J = 5.5$  Hz, 1H) ppm;  **$^{13}\text{C}$  NMR (100 MHz, Chloroform-*d*):**  $\delta$  157.73, 142.61, 131.31, 130.01, 128.44, 128.18, 125.57, 113.39, 55.29, 35.68, 30.96, 22.82, 20.24, 9.63 ppm.

**Trans isomer  $^1\text{H}$  NMR (400 MHz, Chloroform-*d*):** (resolved signals only)  $\delta$  7.30 – 7.13 (m, 5H), 6.96 (d,  $J = 8.7$  Hz, 2H), 6.81 (d,  $J = 8.7$  Hz, 2H), 3.78 (s, 3H), 2.77 (dd,  $J = 8.7, 6.6$  Hz, 2H), 1.74 – 1.70 (m, 1H), 1.70 – 1.66 (m, 1H), 1.60 (dt,  $J = 9.1, 4.8$  Hz, 1H), 1.02 (ddd,  $J = 12.0, 5.2, 2.4$  Hz, 1H), 0.83 (dt,  $J = 8.4, 4.9$  Hz, 1H), 0.73 (ddd,  $J = 8.6, 5.6, 4.7$  Hz, 1H) ppm;  **$^{13}\text{C}$  NMR (100 MHz, Chloroform-*d*):**  $\delta$  157.50, 142.37, 135.72, 128.51, 128.31, 126.78, 125.71, 113.72, 55.34, 36.46, 35.85, 22.62, 18.34, 15.58 ppm; **HRMS (ESI,  $m/z$ ):** calculated for  $[\text{M}+\text{H}]^+$ : 253.1592, found: 253.1585.

### (2-(4-(tert-butyl)phenyl)cyclopropyl)methyl acetate (1al)

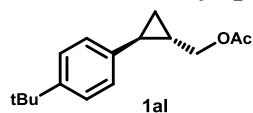

**$^1\text{H}$  NMR (400 MHz, Chloroform-*d*):**  $\delta$  7.30 (d,  $J = 8.4$  Hz, 2H), 7.02 (d,  $J = 8.3$  Hz, 2H), 4.05 (qd,  $J = 11.5, 7.2$  Hz, 2H), 2.08 (s, 3H), 1.87 (dt,  $J = 9.4, 4.9$  Hz, 1H), 1.51 – 1.43 (m, 1H), 1.31 (s, 9H), 0.97 (ddt,  $J = 17.8, 8.8, 5.2$  Hz, 2H) ppm;  **$^{13}\text{C}$  NMR (100 MHz, Chloroform-*d*):**  $\delta$  171.27, 148.71, 138.97, 125.58, 125.28, 68.14, 34.38, 31.39, 21.40, 21.22, 21.10, 13.94 ppm; **HRMS (ESI,  $m/z$ ):** calculated for  $[\text{M}+\text{H}]^+$ : 247.1698, found 247.1695.

### 1-methoxy-4-(2-methoxycyclopropyl)benzene (1an)

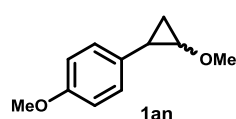

**Cis isomer  $^1\text{H}$  NMR (400 MHz, Chloroform-*d*):**  $\delta$  7.17 (d,  $J = 8.6$  Hz, 2H), 6.83 (d,  $J = 7.3$  Hz, 2H), 3.78 (s, 3H), 3.40 – 3.37 (m, 1H), 3.14 (s, 3H), 1.94 (dt,  $J = 9.6, 6.8$  Hz, 1H), 1.08 (dt,  $J = 9.6, 6.4$  Hz, 1H), 0.99 (ddd,  $J = 7.2, 6.4, 3.7$  Hz, 1H) ppm;  **$^{13}\text{C}$  NMR**

(100 MHz, Chloroform-*d*):  $\delta$  157.94, 133.23, 127.27, 113.90, 63.14, 58.18, 55.38, 22.86, 15.45 ppm;

**Trans isomer  $^1\text{H}$  NMR (400 MHz, Chloroform-*d*):**  $\delta$  6.98 (d,  $J = 8.6$  Hz, 2H), 6.81 (d,  $J = 7.3$  Hz, 2H), 3.77 (s, 3H), 3.41 (s, 3H), 3.25 (ddd,  $J = 6.3, 3.5, 2.6$  Hz, 1H), 2.05 (ddd,  $J = 10.2, 6.4, 2.5$  Hz, 1H), 1.20 (ddd,  $J = 10.3, 6.1, 3.5$  Hz, 1H), 0.94 (q,  $J = 6.3$  Hz, 1H) ppm;  **$^{13}\text{C}$  NMR (100 MHz, Chloroform-*d*):**  $\delta$  157.86, 129.74, 129.00, 113.52, 59.77, 58.21, 55.31, 21.93, 12.45 ppm; **HRMS (ESI,  $m/z$ ):** calculated for  $[\text{M}+\text{H}]^+$ : 179.2385, found: 179.2379.

### 2-(2-(4-methoxyphenyl)cyclopropyl)naphthalene (1ar)

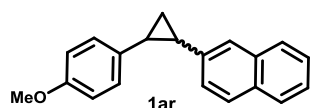

(*Trans* : *Cis* = 0.24 : 1.0)

**Cis isomer  $^1\text{H}$  NMR (400 MHz, Chloroform-*d*):** (resolved signals only)  $\delta$  7.73 – 7.66 (m, 2H), 7.56 (d,  $J = 8.5$  Hz, 1H), 7.48 – 7.46 (m, 1H), 7.42 – 7.34 (m, 2H), 7.02 (dd,  $J = 8.5, 1.7$  Hz, 1H), 6.93 (d,  $J = 8.5$  Hz, 2H), 6.62 (d,  $J = 8.7$  Hz, 2H), 3.67 (s, 3H), 2.55 (dtd,  $J = 24.3, 9.0, 6.5$  Hz, 2H), 1.57 – 1.43 (m, 2H) ppm;  **$^{13}\text{C}$  NMR (100 MHz, Chloroform-*d*):**  $\delta$  157.57, 136.51, 133.22, 131.82, 130.06, 127.57, 127.50, 127.43, 127.11, 127.04, 126.95, 125.62, 124.95, 113.21, 55.09, 24.22, 23.94, 11.67 ppm.

**Trans isomer  $^1\text{H}$  NMR (400 MHz, Chloroform-*d*):** (resolved signals only)  $\delta$  7.83 – 7.78 (m, 2H), 7.77 (d,  $J = 2.1$  Hz, 1H), 7.59 (s, 1H), 7.48 (d,  $J = 1.4$  Hz, 1H), 7.44 (dd,  $J = 3.9, 1.6$  Hz, 1H), 7.28 (dd,  $J = 8.5, 1.8$  Hz, 1H), 7.13 (d,  $J = 8.7$  Hz, 2H), 6.88 (d,  $J = 8.7$  Hz, 2H), 3.81 (s, 3H), 2.26 (ddd,  $J = 8.6, 6.0, 4.0$  Hz, 2H), 1.57 – 1.43 (m, 2H) ppm;  **$^{13}\text{C}$  NMR (100 MHz, Chloroform-*d*):**  $\delta$  157.89, 140.23, 134.48, 133.54, 131.97, 130.20, 128.00, 127.65, 127.32, 126.13, 125.07, 124.68, 123.75, 113.91, 55.38, 27.87, 27.53, 17.85 ppm; **HRMS (ESI,  $m/z$ ):** calculated for  $[\text{M}+\text{H}]^+$ : 275.1436, found 275.1440.

### 6a-ethyl-1,1a,6,6a-tetrahydrocyclopropa[a]indene (1at)

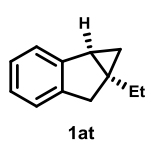

**$^1\text{H}$  NMR (400 MHz, Chloroform-*d*):**  $\delta$  7.25 (d,  $J = 7.9$  Hz, 1H), 7.14 (d,  $J = 7.1$  Hz, 1H), 7.12 – 7.03 (m, 2H), 3.01 (s, 2H), 2.14 (dd,  $J = 7.9, 2.8$  Hz, 1H), 1.75 (dq,  $J = 14.5, 7.4$  Hz, 1H), 1.54 (dq,  $J = 14.7, 7.5$  Hz, 1H), 1.03 (t,  $J = 7.4$  Hz, 3H), 1.01 – 0.98 (m, 1H), 0.24 (t,  $J = 3.6$  Hz, 1H) ppm;  **$^{13}\text{C}$  NMR (100 MHz, Chloroform-*d*):**  $\delta$  147.78, 142.53, 125.84, 125.28, 125.05, 123.02, 39.29, 29.81, 29.56, 28.74, 22.84, 11.81 ppm; **HRMS (ESI,  $m/z$ ):** calculated for  $[\text{M}+\text{Na}]^+$ : 181.0993, found: 181.0995.

### 1-(4-methoxyphenyl)-1a,2,7,7a-tetrahydro-1H-cyclopropa[b]naphthalene (1aw)

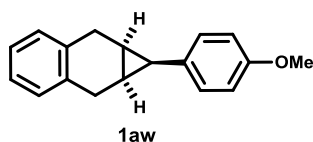

**$^1\text{H}$  NMR (400 MHz, Chloroform-*d*):**  $\delta$  7.09 – 7.01 (m, 2H), 6.91 – 6.80 (m, 4H), 6.63 (d,  $J = 8.7$  Hz, 2H), 3.69 (s, 3H), 3.16 (ddd,  $J = 16.0, 4.3, 2.5$  Hz, 2H), 2.70 (dd,  $J = 17.6, 2.0$  Hz, 2H), 2.16 (t,  $J = 8.7$  Hz, 1H), 1.68 – 1.58 (m, 2H) ppm;  **$^{13}\text{C}$  NMR (100 MHz, Chloroform-*d*):**  $\delta$  157.43, 137.18, 131.31, 129.20, 127.77, 125.32, 113.34, 55.20, 26.81, 23.19, 15.92 ppm; **HRMS (ESI,  $m/z$ ):** calculated for  $[\text{M}+\text{Na}]^+$ : 273.3308, found: 273.3303.

### benzyl 6-(4-methoxyphenyl)bicyclo[3.1.0]hexane-3-carboxylate (**1ax**)

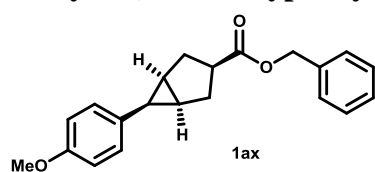

**<sup>1</sup>H NMR (400 MHz, Chloroform-*d*):**  $\delta$  7.36 – 7.32 (m, 1H), 7.32 – 7.29 (m, 2H), 7.26 (dd,  $J = 7.6, 1.8$  Hz, 2H), 7.17 – 7.13 (m, 2H), 6.84 (d,  $J = 8.6$  Hz, 2H), 4.98 (s, 2H), 3.79 (s, 3H), 2.19 – 2.10 (m, 2H), 2.04 (dd,  $J = 13.3, 8.6$  Hz, 2H), 1.93 (t,  $J = 8.3$  Hz, 1H), 1.75 – 1.63 (m, 2H), 1.50 – 1.35 (m, 1H) ppm; **<sup>13</sup>C NMR (100 MHz, Chloroform-*d*):**  $\delta$  175.20, 158.08, 136.23, 130.25, 129.45, 128.49, 128.08, 128.06, 114.11, 66.02, 55.21, 41.55, 29.68, 22.41 (d,  $J = 11.0$  Hz) ppm; **HRMS (ESI, *m/z*):** calculated for  $[M+Na]^+$ : 354.3938, found: 354.3944.

### 1-(2-decylcyclopropyl)-4-methoxybenzene (**1ay**)

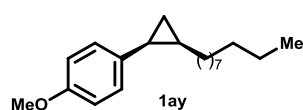

**<sup>1</sup>H NMR (400 MHz, Chloroform-*d*):**  $\delta$  7.11 (d,  $J = 8.4$  Hz, 2H), 6.82 (d,  $J = 8.7$  Hz, 2H), 3.79 (s, 3H), 2.08 – 1.99 (m, 1H), 1.34 – 1.09 (m, 18H), 1.04 – 0.98 (m, 1H), 0.93 (dd,  $J = 8.4, 4.7$  Hz, 1H), 0.89 (t,  $J = 6.9$  Hz, 3H), 0.55 (q,  $J = 5.5$  Hz, 1H) ppm; **<sup>13</sup>C NMR (100 MHz, Chloroform-*d*):**  $\delta$  157.71, 131.86, 130.14, 113.36, 55.36, 32.10, 29.80, 29.78, 29.75, 29.62, 29.58, 29.53, 28.78, 22.87, 20.25, 18.90, 14.32, 9.81 ppm; **HRMS (ESI, *m/z*):** calculated for  $[M+H]^+$ : 288.2453, found: 288.2446.

### 2-(2-(4-methoxyphenyl)cyclopropyl)dibenzo[*b,e*]oxepin-11(6H)-one (**1az**)

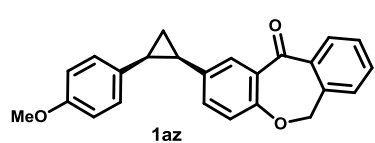

**<sup>1</sup>H NMR (400 MHz, Chloroform-*d*):**  $\delta$  7.99 (d,  $J = 2.3$  Hz, 1H), 7.90 (dd,  $J = 7.7, 1.4$  Hz, 1H), 7.56 (td,  $J = 7.4, 1.4$  Hz, 1H), 7.47 (td,  $J = 7.6, 1.3$  Hz, 1H), 7.36 (d,  $J = 7.4$  Hz, 1H), 7.29 (dd,  $J = 8.5, 2.5$  Hz, 1H), 7.11 – 7.06 (m, 2H), 6.99 (d,  $J = 8.4$  Hz, 1H), 6.85 (d,  $J = 8.7$  Hz, 2H), 5.18 (s, 2H), 3.80 (s, 3H), 2.13 (ddq,  $J = 8.9, 6.0, 4.7$  Hz, 2H), 1.40 (tdt,  $J = 13.1, 6.9, 3.5$  Hz, 2H) ppm; **<sup>13</sup>C NMR (100 MHz, Chloroform-*d*):**  $\delta$  191.16, 159.55, 157.87, 140.49, 136.48, 135.68, 134.29, 133.49, 132.73, 129.50, 129.23, 128.20, 127.77, 126.92, 125.10, 120.71, 113.88, 73.66, 55.36, 27.04, 26.58, 17.67 ppm; **HRMS (ESI, *m/z*):** calculated for  $[M+H]^+$ : 357.1491, found 357.1482.

### 1-(3-methoxyphenyl)-3-methyl-3-(1H-pyrazol-1-yl)butan-1-one (**3aa**)

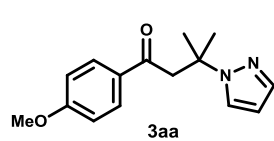

Following the General Procedure E, **3aa** was obtained in 80% yield as a colorless oil; **<sup>1</sup>H NMR (400 MHz, Chloroform-*d*):**  $\delta$  7.79 (d,  $J = 8.9$  Hz, 2H), 7.51 (s, 1H), 7.50 (s, 1H), 6.84 (d,  $J = 8.9$  Hz, 2H), 6.15 (t,  $J = 2.1$  Hz, 1H), 3.84 (s, 3H), 3.51 (s, 2H), 1.78 (s, 6H) ppm; **<sup>13</sup>C NMR (100 MHz, Chloroform-*d*):**  $\delta$  196.24, 163.44, 138.99, 130.57, 130.43, 126.37, 113.52, 104.58, 59.67, 55.45, 48.76, 27.96 ppm; **HRMS (ESI, *m/z*):** calculated for  $[M+H]^+$ : 258.1447, found: 259.1441.

### 1-(4-bromophenyl)-3-methyl-3-(1H-pyrazol-1-yl)butan-1-one (**3ba**)

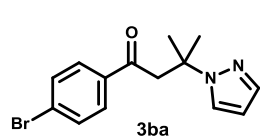

Following the General Procedure E, **3ba** was obtained in 80% yield as a colorless oil; **<sup>1</sup>H NMR (400 MHz, Chloroform-*d*):**  $\delta$  7.64 (d,  $J = 8.6$  Hz, 2H), 7.49 (d,  $J = 5.9$  Hz, 2H), 7.47 (s, 1H), 7.47 (d,  $J = 1.7$  Hz, 1H), 6.13 (t,  $J = 2.1$  Hz, 1H), 3.52 (s, 2H), 1.76 (s, 6H) ppm; **<sup>13</sup>C NMR (100 MHz, Chloroform-*d*):**  $\delta$  196.87, 139.17, 136.13,



131.75, 129.69, 128.34, 126.46, 104.81, 59.61, 49.05, 28.06 ppm; **HRMS (ESI, m/z)**: calculated for  $[M+H]^+$ : 307.0446, found: 307.0441.

### 3-methyl-3-(1H-pyrazol-1-yl)-1-(p-tolyl)butan-1-one (3ca)

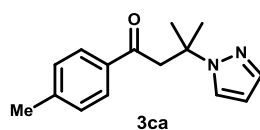

Following the General Procedure E, **3ca** was obtained in 65% yield as a colorless oil;  **$^1\text{H NMR}$  (400 MHz, Chloroform-*d*)**:  $\delta$  7.72 (d,  $J = 8.2$  Hz, 2H), 7.52 (d,  $J = 2.4$  Hz, 1H), 7.50 (d,  $J = 1.7$  Hz, 1H), 7.17 (d,  $J = 8.0$  Hz, 2H), 6.15 (t,  $J = 2.1$  Hz, 1H), 3.54 (s, 2H), 2.36 (s, 3H), 1.78 (s, 6H) ppm;  **$^{13}\text{C NMR}$  (100 MHz, Chloroform-*d*)**:  $\delta$  197.41, 143.95, 139.07, 135.04, 129.20, 128.29, 126.46, 104.67, 59.67, 48.95, 28.00, 21.70 ppm; **HRMS (ESI, m/z)**: calculated for  $[M+H]^+$ : 243.1497, found: 243.1493.

### 1-(4-(tert-butyl)phenyl)-3-methyl-3-(1H-pyrazol-1-yl)butan-1-one (3da)

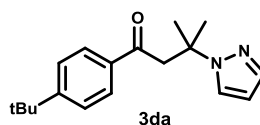

Following the General Procedure E, **3da** was obtained in 77% yield as a white solid, mp 48-50 °C;  **$^1\text{H NMR}$  (400 MHz, Chloroform-*d*)**:  $\delta$  7.77 (d,  $J = 8.6$  Hz, 2H), 7.53 (dd,  $J = 2.4$ , 0.7 Hz, 1H), 7.50 (d,  $J = 1.8$  Hz, 1H), 7.39 (d,  $J = 8.6$  Hz, 2H), 6.16 (t,  $J = 2.1$  Hz, 1H), 3.56 (s, 2H), 1.78 (s, 6H), 1.31 (s, 9H) ppm;  **$^{13}\text{C NMR}$  (100 MHz, Chloroform-*d*)**:  $\delta$  197.43, 156.86, 139.07, 135.06, 128.15, 126.45, 125.48, 104.66, 59.69, 49.00, 35.16, 31.17, 28.03 ppm; **HRMS (ESI, m/z)**: calculated for  $[M+H]^+$ : 285.1967, found: 285.1965.

### 3-methyl-1-phenyl-3-(1H-pyrazol-1-yl)butan-1-one (3ea)

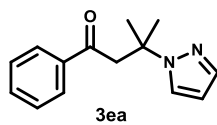

Following the General Procedure E, **3ea** was obtained in 34% yield as a colorless oil;  **$^1\text{H NMR}$  (400 MHz, Chloroform-*d*)**:  $\delta$  7.82 (dd,  $J = 8.2$ , 1.0 Hz, 2H), 7.52 (d,  $J = 2.4$  Hz, 1H), 7.48 (dd,  $J = 5.3$ , 1.4 Hz, 2H), 7.37 (t,  $J = 7.7$  Hz, 2H), 6.15 (t,  $J = 2.0$  Hz, 1H), 3.58 (s, 2H), 1.78 (s, 6H) ppm;  **$^{13}\text{C NMR}$  (100 MHz, Chloroform-*d*)**:  $\delta$  197.81, 139.11, 133.15, 128.53, 128.15, 126.47, 104.71, 59.63, 49.07, 28.03 ppm; **HRMS (ESI, m/z)**: calculated for  $[M+H]^+$ : 229.1341, found: 229.1340.

### 1-(3-methoxyphenyl)-3-methyl-3-(1H-pyrazol-1-yl)butan-1-one (3fa)

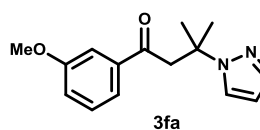

Following the General Procedure E, **3fa** was obtained in 72% yield as a colorless oil;  **$^1\text{H NMR}$  (400 MHz, Chloroform-*d*)**:  $\delta$  7.53 (dd,  $J = 2.3$ , 0.7 Hz, 1H), 7.50 (d,  $J = 1.4$  Hz, 1H), 7.41 (dt,  $J = 7.7$ , 1.3 Hz, 1H), 7.36 (dd,  $J = 2.7$ , 1.6 Hz, 1H), 7.31 – 7.23 (m, 1H), 7.07 (dd,  $J = 2.7$ , 1.0 Hz, 1H), 7.05 (dd,  $J = 2.7$ , 1.0 Hz, 1H), 6.17 (t,  $J = 2.1$  Hz, 1H), 3.82 (s, 3H), 3.57 (s, 2H), 1.79 (s, 6H) ppm;  **$^{13}\text{C NMR}$  (100 MHz, Chloroform-*d*)**:  $\delta$  197.57, 159.79, 139.11, 138.87, 129.52, 126.46, 120.93, 119.89, 112.06, 104.69, 59.61, 55.50, 49.17, 28.05 ppm; **HRMS (ESI, m/z)**: calculated for  $[M+H]^+$ : 259.1447, found: 259.1442.

### 1-(3-methoxyphenyl)-3-methyl-3-(1H-pyrazol-1-yl)butan-1-one (3ga)

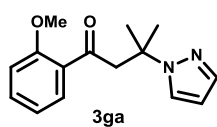

Following the General Procedure E, **3ga** was obtained in 62% yield as a colorless oil;  **$^1\text{H NMR}$  (400 MHz, Chloroform-*d*)**:  $\delta$  7.53 (d,  $J = 2.0$  Hz, 1H), 7.45 (d,  $J = 1.4$  Hz, 1H), 7.43 (dd,  $J = 7.7$ , 1.8 Hz, 1H), 7.38 (ddd,  $J = 8.4$ , 7.5, 1.8 Hz, 1H), 6.94 – 6.86 (m, 2H), 6.15 (t,  $J = 2.1$  Hz, 1H), 3.86 (s, 3H), 3.61 (s, 2H), 1.75 (s, 6H) ppm;  **$^{13}\text{C NMR}$  (100 MHz, Chloroform-*d*)**:  $\delta$  200.36, 158.15, 138.83, 133.30, 130.01, 129.40, 126.48, 120.66,

111.48, 104.47, 59.80, 55.64, 53.95, 28.20 ppm; **HRMS (ESI, m/z)**: calculated for  $[M+H]^+$ : 259.1447, found: 259.1439.

### 1-([1,1'-biphenyl]-4-yl)-3-methyl-3-(1H-pyrazol-1-yl)butan-1-one (3ha)

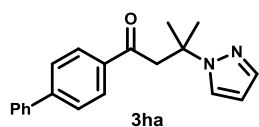

Following the General Procedure E, **3ha** was obtained in 73% yield as a white solid, mp 108-109 °C; **<sup>1</sup>H NMR (400 MHz, Chloroform-*d*)**:  $\delta$  7.90 (d,  $J$  = 8.5 Hz, 2H), 7.60 (d,  $J$  = 8.6 Hz, 4H), 7.54 (d,  $J$  = 2.3 Hz, 1H), 7.52 (d,  $J$  = 1.7 Hz, 1H), 7.46 (t,  $J$  = 7.4 Hz, 2H), 7.39 (t,  $J$  = 7.3 Hz, 1H), 6.18 – 6.14 (t,  $J$  = 2.1 Hz, 1H), 3.61 (s, 2H), 1.81 (s, 6H) ppm; **<sup>13</sup>C NMR (100 MHz, Chloroform-*d*)**:  $\delta$  197.42, 145.76, 139.92, 139.15, 136.23, 129.04, 128.80, 128.33, 127.36, 127.16, 126.50, 104.76, 59.73, 49.17, 28.09 ppm; **HRMS (ESI, m/z)**: calculated for  $[M+H]^+$ : 305.1654, found: 305.1649.

### 1-(4-([1,1'-biphenyl]-4-yl)-4-hydroperoxy-2-methylbutan-2-yl)-1H-pyrazole (int-ha)

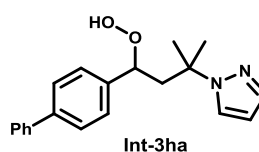

**<sup>1</sup>H NMR (400 MHz, Chloroform-*d*)**:  $\delta$  7.62 (d,  $J$  = 2.1 Hz, 2H), 7.59 (d,  $J$  = 1.5 Hz, 1H), 7.57 (d,  $J$  = 2.0 Hz, 1H), 7.56 (d,  $J$  = 8.2 Hz, 2H), 7.45 – 7.39 (m, 4H), 7.34 (t,  $J$  = 7.3 Hz, 1H), 6.31 (t,  $J$  = 2.1 Hz, 1H), 4.81 (dd,  $J$  = 9.8, 2.0 Hz, 1H), 2.42 (dd,  $J$  = 15.1, 9.9 Hz, 1H), 2.15 (dd,  $J$  = 15.1, 2.2 Hz, 1H), 1.75 (s, 3H), 1.73 (s, 3H) ppm; **<sup>13</sup>C NMR (100 MHz, Chloroform-*d*)**:  $\delta$  144.78, 141.13, 140.27, 139.16, 128.89, 127.33, 127.31, 127.25, 127.07, 126.26, 105.44, 70.53, 60.84, 52.28, 30.03, 28.22 ppm; **HRMS (ESI, m/z)**: calculated for  $[M+Na]^+$ : 345.1579, found: 345.1587.

### 1-(4-cyclopropylphenyl)-3-methyl-3-(1H-pyrazol-1-yl)butan-1-one (3ia)

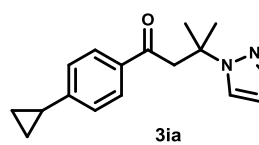

Following the General Procedure E, **3ia** was obtained in 56% yield as a colorless oil; **<sup>1</sup>H NMR (400 MHz, Chloroform-*d*)**:  $\delta$  7.71 (d,  $J$  = 8.3 Hz, 2H), 7.52 (d,  $J$  = 2.4 Hz, 1H), 7.50 (d,  $J$  = 1.6 Hz, 1H), 7.03 (d,  $J$  = 8.4 Hz, 2H), 6.16 (t,  $J$  = 2.0 Hz, 1H), 3.53 (s, 2H), 1.90 (ddd,  $J$  = 13.4, 8.3, 4.9 Hz, 1H), 1.77 (s, 6H), 1.09 – 0.98 (m, 2H), 0.77 – 0.72 (m, 2H) ppm; **<sup>13</sup>C NMR (100 MHz, Chloroform-*d*)**:  $\delta$  197.23, 150.44, 139.08, 134.93, 128.38, 126.46, 125.41, 104.68, 59.72, 48.94, 28.03, 15.79, 10.50 ppm; **HRMS (ESI, m/z)**: calculated for  $[M+H]^+$ : 269.1654, found: 269.1649.

### 1-(3-fluoro-4-methoxyphenyl)-3-methyl-3-(1H-pyrazol-1-yl)butan-1-one (3ja)

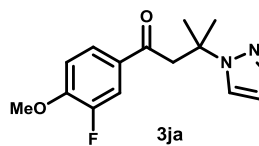

Following the General Procedure E, **3ja** was obtained in 74% yield as a colorless oil; **<sup>1</sup>H NMR (400 MHz, Chloroform-*d*)**:  $\delta$  7.58 – 7.48 (m, 2H), 7.47 (d,  $J$  = 2.1 Hz, 2H), 6.86 (t,  $J$  = 8.3 Hz, 1H), 6.12 (t,  $J$  = 2.1 Hz, 1H), 3.88 (s, 3H), 3.47 (s, 2H), 1.75 (s, 6H) ppm; **<sup>13</sup>C NMR (100 MHz, Chloroform-*d*)**:  $\delta$  195.53 (d,  $J$  = 1.9 Hz), 152.55 (d,  $J$  = 115.3 Hz), 151.26 (d,  $J$  = 121.4 Hz), 139.12, 130.80 (d,  $J$  = 4.9 Hz), 126.49, 125.61 (d,  $J$  = 3.3 Hz), 115.73 (d,  $J$  = 19.1 Hz), 112.12 (d,  $J$  = 1.8 Hz), 104.75, 59.68, 56.31, 48.85, 28.05 ppm; **HRMS (ESI, m/z)**: calculated for  $[M+H]^+$ : 277.1352, found: 277.1349.

### 1-(3-chloro-4-methoxyphenyl)-3-methyl-3-(1H-pyrazol-1-yl)butan-1-one (3ka)

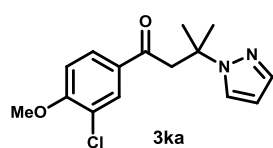

Following the General Procedure E, **3ka** was obtained in 71% yield as a white solid, mp 65-68 °C; <sup>1</sup>H NMR (400 MHz, Chloroform-*d*): δ 7.80 (d, *J* = 2.2 Hz, 1H), 7.69 (dd, *J* = 8.7, 2.2 Hz, 1H), 7.49 (d, *J* = 1.8 Hz, 1H), 7.47 (d, *J* = 2.3 Hz, 1H), 6.84 (d, *J* = 8.6 Hz, 1H), 6.12 (t, *J* = 2.1 Hz, 1H), 3.92 (s, 3H), 3.48 (s, 2H), 1.76 (s, 6H) ppm; <sup>13</sup>C NMR (100 MHz, Chloroform-*d*): δ 195.51, 158.80, 139.19, 131.08, 130.52, 128.71, 126.52, 122.77, 111.10, 104.78, 59.71, 56.44, 48.98, 28.08 ppm; HRMS (ESI, *m/z*): calculated for [M+H]<sup>+</sup>: 293.1057, found: 293.1059.

### 1-(3-bromo-4-methoxyphenyl)-3-methyl-3-(1H-pyrazol-1-yl)butan-1-one (3la)

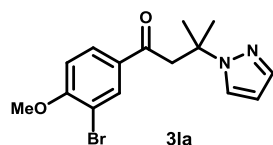

Following the General Procedure E, **3la** was obtained in 82% yield as a white solid, mp 84-91 °C; <sup>1</sup>H NMR (400 MHz, Chloroform-*d*): δ 7.35 (d, *J* = 0.7 Hz, 1H), 7.05 (dd, *J* = 8.4, 0.8 Hz, 1H), 6.80 (d, *J* = 8.4 Hz, 2H), 3.87 (s, 5H), 1.84 – 1.74 (m, 3H), 1.20 (s, 3H), 0.78 (s, 3H), 0.75 (dd, *J* = 8.4, 4.8 Hz, 2H), 0.70 (t, *J* = 5.2 Hz, 2H) ppm; <sup>13</sup>C NMR (100 MHz, Chloroform-*d*): δ 195.39, 159.63, 139.20, 133.68, 131.50, 129.43, 126.52, 111.83, 110.94, 104.79, 59.70, 56.54, 48.98, 28.08 ppm; HRMS (ESI, *m/z*): calculated for [M+H]<sup>+</sup>: 337.0552, found: 337.0546.

### 1-(4-methoxy-3-methylphenyl)-3-methyl-3-(1H-pyrazol-1-yl)butan-1-one (3ma)

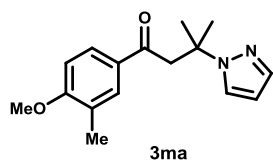

Following the General Procedure E, **3ma** was obtained in 48% yield as a colorless oil; <sup>1</sup>H NMR (400 MHz, Chloroform-*d*): δ 7.67 (dd, *J* = 8.6, 2.3 Hz, 1H), 7.59 (d, *J* = 2.5 Hz, 1H), 7.50 (dd, *J* = 7.7, 2.1 Hz, 2H), 6.74 (d, *J* = 8.6 Hz, 1H), 6.14 (t, *J* = 2.1 Hz, 1H), 3.85 (s, 3H), 3.50 (s, 2H), 2.17 (s, 3H), 1.77 (s, 6H) ppm; <sup>13</sup>C NMR (100 MHz, Chloroform-*d*): δ 196.66, 161.84, 139.03, 130.82, 130.10, 128.39, 126.54, 109.10, 104.63, 59.78, 55.57, 48.90, 28.03, 16.26 ppm; HRMS (ESI, *m/z*): calculated for [M+H]<sup>+</sup>: 273.1603, found: 273.1604.

### 1-(3,4-dimethoxyphenyl)-3-methyl-3-(1H-pyrazol-1-yl)butan-1-one (3na)

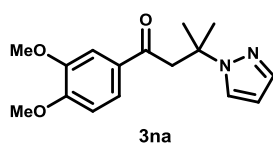

Following the General Procedure E, **3na** was obtained in 42% yield as a colorless oil; <sup>1</sup>H NMR (400 MHz, Chloroform-*d*): δ 7.50 (d, *J* = 2.3 Hz, 2H), 7.42 (dd, *J* = 8.4, 2.1 Hz, 1H), 7.38 (d, *J* = 2.0 Hz, 1H), 6.77 (d, *J* = 8.3 Hz, 1H), 6.14 (t, *J* = 2.1 Hz, 1H), 3.90 (s, 3H), 3.88 (s, 3H), 3.52 (s, 2H), 1.77 (s, 6H) ppm; <sup>13</sup>C NMR (100 MHz, Chloroform-*d*): δ 196.38, 153.38, 148.92, 139.10, 130.77, 126.55, 123.11, 110.10, 109.87, 59.75, 56.00, 48.68, 28.11 ppm; HRMS (ESI, *m/z*): calculated for [M+H]<sup>+</sup>: 289.1552, found: 289.1551.

### Methyl 2-methoxy-5-(3-methyl-3-(1H-pyrazol-1-yl)butanoyl)benzoate (3oa)

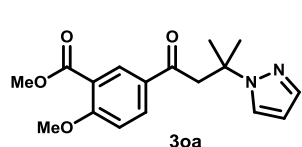

Following the General Procedure E, **3oa** was obtained in 71% yield as a white solid, mp 55-59 °C; <sup>1</sup>H NMR (400 MHz, Chloroform-*d*): δ 8.23 (d, *J* = 2.4 Hz, 1H), 7.93 (dd, *J* = 8.8, 2.4 Hz, 1H), 7.48 (d, *J* = 2.4 Hz, 1H), 7.47 (d, *J* = 1.7 Hz, 1H), 6.92 (d, *J* = 8.9 Hz, 1H), 6.12 (t, *J* = 2.1 Hz, 1H), 3.94 (s, 3H), 3.89 (s, 3H), 3.53 (s, 2H), 1.77 (s, 6H) ppm; <sup>13</sup>C NMR (100 MHz, Chloroform-*d*): δ 195.72, 165.84, 162.61, 139.12, 133.78, 132.35, 129.79, 126.51, 119.80, 111.57, 104.71, 59.65, 56.37,

52.31, 48.89, 28.07 ppm; **HRMS (ESI, m/z)**: calculated for  $[M+H]^+$ : 317.1501, found: 317.1495.

### 1-(3,4-dimethylphenyl)-3-methyl-3-(1H-pyrazol-1-yl)butan-1-one (3pa)

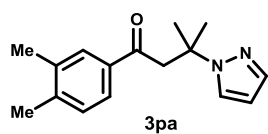

Following the General Procedure E, **3pa** was obtained in 60% yield as a colorless oil;  **$^1\text{H NMR}$  (400 MHz, Chloroform-*d*)**:  $\delta$  7.56 (d,  $J = 6.4$  Hz, 2H), 7.51 (d,  $J = 2.3$  Hz, 2H), 7.12 (d,  $J = 8.5$  Hz, 1H), 6.15 (t,  $J = 2.1$  Hz, 1H), 3.54 (s, 2H), 2.27 (s, 3H), 2.25 (s, 3H), 1.78 (s, 6H) ppm;  **$^{13}\text{C NMR}$  (100 MHz, Chloroform-*d*)**:  $\delta$  197.68, 142.72, 139.06, 136.84, 135.43, 129.76, 129.31, 126.51, 125.92, 104.66, 59.71, 49.08, 28.02, 20.12, 19.82 ppm; **HRMS (ESI, m/z)**: calculated for  $[M+H]^+$ : 257.1654, found: 257.1651.

### 1-(4-(3,4-dimethylphenyl)-4-hydroperoxy-2-methylbutan-2-yl)-1H-pyrazole (Int-3pa)

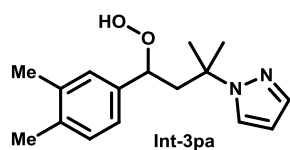

**$^1\text{H NMR}$  (400 MHz, Chloroform-*d*)**:  $\delta$  8.44 (s, 1H), 7.57 (d,  $J = 2.4$  Hz, 1H), 7.56 (d,  $J = 1.5$  Hz, 1H), 7.09 (d,  $J = 7.5$  Hz, 1H), 7.00 (s, 1H), 6.97 (d,  $J = 7.6$  Hz, 1H), 6.27 (t,  $J = 2.1$  Hz, 1H), 4.57 (dd,  $J = 9.0, 3.1$  Hz, 1H), 2.28 (d,  $J = 3.0$  Hz, 1H), 2.23 (s, 6H), 1.72 (s, 3H), 1.62 (s, 3H).  **$^{13}\text{C NMR}$  (100 MHz, Chloroform-*d*)**:  $\delta$  139.19, 138.53, 136.92, 136.61, 129.90, 127.94, 126.88, 124.15, 104.99, 84.51, 60.08, 46.75, 29.03, 28.20, 19.94, 19.61 ppm.

### 3-methyl-1-(naphthalen-2-yl)-3-(1H-pyrazol-1-yl)butan-1-one (3qa)

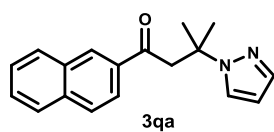

Following the General Procedure E, **3qa** was obtained in 46% yield as a white solid, mp 55-57 °C;  **$^1\text{H NMR}$  (400 MHz, Chloroform-*d*)**:  $\delta$  8.24 (s, 1H), 7.91 (dd,  $J = 8.8, 1.9$  Hz, 2H), 7.88 (d,  $J = 7.6$  Hz, 2H), 7.81 (t,  $J = 7.7$  Hz, 1H), 7.61 – 7.52 (m, 2H), 7.52 – 7.50 (d, 1H), 6.11 (t,  $J = 2.1$  Hz, 1H), 3.70 (s, 2H), 1.83 (s, 6H) ppm;  **$^{13}\text{C NMR}$  (100 MHz, Chloroform-*d*)**:  $\delta$  197.86, 139.22, 135.61, 134.79, 132.50, 130.19, 129.80, 128.58, 128.35, 127.78, 126.78, 126.59, 123.76, 104.81, 59.85, 49.40, 28.14 ppm; **HRMS (ESI, m/z)**: calculated for  $[M+H]^+$ : 279.1497, found: 279.1493.

### 1-(benzofuran-5-yl)-3-methyl-3-(1H-pyrazol-1-yl)butan-1-one (3ra)

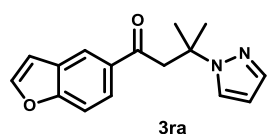

Following the General Procedure E, **3ra** was obtained in 50% yield as a white solid, mp 47-53 °C;  **$^1\text{H NMR}$  (400 MHz, Chloroform-*d*)**:  $\delta$  8.08 (d,  $J = 1.8$  Hz, 1H), 7.83 (dd,  $J = 8.8, 1.9$  Hz, 1H), 7.65 (d,  $J = 2.2$  Hz, 1H), 7.50 (d,  $J = 2.1$  Hz, 2H), 7.45 (d,  $J = 8.8$  Hz, 1H), 6.80 (dd,  $J = 2.2, 0.9$  Hz, 1H), 6.12 (t,  $J = 2.1$  Hz, 1H), 3.63 (s, 2H), 1.80 (s, 6H) ppm;  **$^{13}\text{C NMR}$  (100 MHz, Chloroform-*d*)**:  $\delta$  197.36, 157.55, 146.40, 139.12, 133.13, 127.46, 126.54, 124.90, 122.64, 111.42, 107.41, 104.73, 59.82, 49.34, 28.09 ppm; **HRMS (ESI, m/z)**: calculated for  $[M+H]^+$ : 269.1290, found: 269.1288.

### 1-(1a,6b-dihydro-1H-cyclopropa[b]benzofuran-5-yl)-3-methyl-3-(1H-pyrazol-1-yl)butan-1-one (3sa)

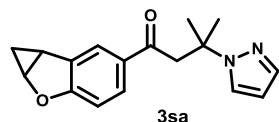

Following the General Procedure E, **3sa** was obtained in 39% yield as a white solid, mp 47-52 °C;  **$^1\text{H NMR}$  (400 MHz, Chloroform-*d*)**:  $\delta$  7.80 (d,  $J = 2.0$  Hz, 1H), 7.62 (dd,  $J = 8.5,$

2.0 Hz, 1H), 7.50 (d,  $J = 1.4$  Hz, 1H), 7.49 (d,  $J = 2.4$  Hz, 1H), 6.74 (d,  $J = 8.4$  Hz, 1H), 6.14 (t,  $J = 2.1$  Hz, 1H), 4.86 (td,  $J = 5.4, 1.8$  Hz, 1H), 3.50 (d,  $J = 3.5$  Hz, 2H), 2.59 (dt,  $J = 9.2, 4.7$  Hz, 1H), 1.77 (s, 6H), 1.06 (ddd,  $J = 8.9, 6.6, 5.5$  Hz, 1H), 0.29 (ddd,  $J = 6.4, 4.1, 1.8$  Hz, 1H) ppm;  $^{13}\text{C}$  NMR (100 MHz, Chloroform-*d*):  $\delta$  196.38, 163.48, 139.04, 131.74, 130.99, 129.03, 126.55, 124.49, 109.92, 104.64, 62.97, 59.78, 49.05, 28.07, 28.01, 19.39, 10.38 ppm; HRMS (ESI, *m/z*): calculated for  $[\text{M}+\text{H}]^+$ : 283.147, found: 283.145.

### 2-(3-methyl-3-(1H-pyrazol-1-yl)butanoyl)dibenzo[b,e]oxepin-11(6H)-one (3ta)

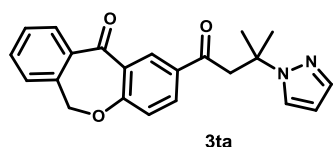

Following the General Procedure E, **3ta** was obtained in 74% yield as a white solid, mp 116-121 °C;  $^1\text{H}$  NMR (400 MHz, Chloroform-*d*):  $\delta$  8.68 (d,  $J = 2.4$  Hz, 1H), 7.95 (dd,  $J = 8.7, 2.4$  Hz, 1H), 7.85 (dd,  $J = 7.7, 1.4$  Hz, 1H), 7.58 (td,  $J = 7.4, 1.4$  Hz, 1H), 7.53 (d,  $J = 2.4$  Hz, 1H), 7.50 (dd,  $J = 7.6, 1.3$  Hz, 1H), 7.47 (dd,  $J = 5.9, 1.5$  Hz, 1H), 7.38 (d,  $J = 7.4$  Hz, 1H), 7.02 (d,  $J = 8.7$  Hz, 1H), 6.13 (t,  $J = 2.1$  Hz, 1H), 5.22 (s, 2H), 3.62 (s, 2H), 1.79 (s, 6H) ppm;  $^{13}\text{C}$  NMR (100 MHz, Chloroform-*d*):  $\delta$  195.80, 190.54, 164.46, 140.50, 138.96, 134.58, 134.32, 133.35, 133.04, 131.53, 129.65, 129.26, 128.05, 126.38, 124.25, 121.21, 104.57, 73.45, 59.49, 48.77, 28.05 ppm; HRMS (ESI, *m/z*): calculated for  $[\text{M}+\text{H}]^+$ : 361.1552, found: 361.1545.

### 1-(4-methoxyphenyl)-3-(1H-pyrazol-1-yl)propan-1-one (3ua)

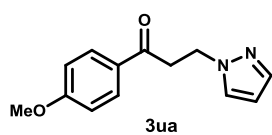

Following the General Procedure E, **3ua** was obtained in 60% yield as a colorless oil;  $^1\text{H}$  NMR (400 MHz, Chloroform-*d*):  $\delta$  7.89 (d,  $J = 8.9$  Hz, 2H), 7.48 (d,  $J = 2.1$  Hz, 2H), 6.89 (d,  $J = 8.9$  Hz, 2H), 6.18 (t,  $J = 2.1$  Hz, 1H), 4.57 (t,  $J = 6.6$  Hz, 2H), 3.83 (s, 3H), 3.51 (t,  $J = 6.6$  Hz, 2H) ppm;  $^{13}\text{C}$  NMR (100 MHz, Chloroform-*d*):  $\delta$  196.03, 163.86, 139.64, 130.45, 130.22, 129.57, 113.90, 105.34, 55.59, 46.87, 38.57 . ppm; HRMS (ESI, *m/z*): calculated for  $[\text{M}+\text{H}]^+$ : 231.1134, found: 231.1131.

### 3-ethyl-1-(4-methoxyphenyl)-3-(1H-pyrazol-1-yl)pentan-1-one (3va)

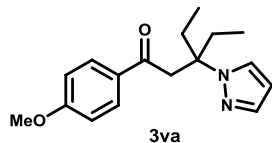

Following the General Procedure E, **3va** was obtained in 44% yield as a colorless oil;  $^1\text{H}$  NMR (400 MHz, Chloroform-*d*):  $\delta$  7.81 (d,  $J = 9.0$  Hz, 2H), 7.50 – 7.49 (dd,  $J = 2.4$  Hz, 1H), 7.48 (d,  $J = 1.8$  Hz, 1H), 6.83 (d,  $J = 9.0$  Hz, 2H), 6.16 – 6.10 (m, 1H), 3.83 (s, 3H), 3.58 (s, 2H), 2.26 – 2.13 (m, 4H), 0.76 (t,  $J = 7.4$  Hz, 6H) ppm;  $^{13}\text{C}$  NMR (100 MHz, Chloroform-*d*):  $\delta$  196.42, 163.47, 138.65, 130.80, 130.41, 127.47, 113.57, 104.46, 66.06, 55.53, 43.41, 29.06, 7.84 ppm; HRMS (ESI, *m/z*): calculated for  $[\text{M}+\text{H}]^+$ : 287.1760, found: 287.1758.

### 3,3-dicyclopropyl-1-(4-methoxyphenyl)-3-(1H-pyrazol-1-yl)propan-1-one (3wa)

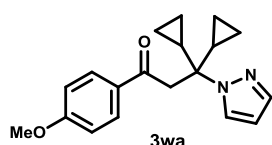

Following the General Procedure E, **3wa** was obtained in 69% yield as a white solid, mp 77-83 °C;  $^1\text{H}$  NMR (400 MHz, Chloroform-*d*):  $\delta$  7.95 (d,  $J = 8.9$  Hz, 2H), 7.93 (d,  $J = 0.7$  Hz, 1H), 7.38 (d,  $J = 1.2$  Hz, 1H), 6.89 (d,  $J = 8.9$  Hz, 2H), 6.21 (t,  $J = 2.1$  Hz, 1H), 3.86 (s, 2H), 3.84 (s, 3H), 1.45 – 1.34 (m, 2H), 0.78 (td,  $J = 10.0, 5.7$  Hz, 2H), 0.59 – 0.47 (m, 2H), 0.49 – 0.37 (m, 2H), 0.16 (dq,  $J = 10.5, 5.5$  Hz, 2H) ppm;

**<sup>13</sup>C NMR (100 MHz, Chloroform-*d*):**  $\delta$  196.01, 163.31, 137.93, 131.16, 130.49, 128.79, 113.58, 104.34, 63.35, 55.52, 46.77, 17.54, 2.44, 1.69 ppm; **HRMS (ESI, *m/z*):** calculated for  $[M+H]^+$ : 311.1760, found: 311.1753.

### 2-(1-(1H-pyrazol-1-yl)cyclopropyl)-1-(4-methoxyphenyl)ethan-1-one (3xa)

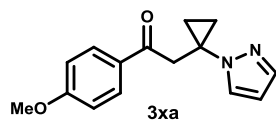

Following the General Procedure E, **3xa** was obtained in 42% yield as a white solid, mp 84-88 °C; **<sup>1</sup>H NMR (400 MHz, Chloroform-*d*):**  $\delta$  7.75 (d, *J* = 8.9 Hz, 2H), 7.43 (d, *J* = 1.9 Hz, 1H), 7.22 (d, *J* = 2.3 Hz, 1H), 6.90 (d, *J* = 8.9 Hz, 2H), 6.14 (t, *J* = 2.1 Hz, 1H), 4.51 (s, 2H), 3.85 (s, 3H), 1.33 – 1.26 (m, 2H), 1.13 – 1.05 (m, 2H) ppm; **<sup>13</sup>C NMR (100 MHz, Chloroform-*d*):**  $\delta$  199.57, 163.09, 139.47, 130.83, 129.26, 113.84, 105.73, 57.38, 55.54, 30.91, 12.08 ppm; **HRMS (ESI, *m/z*):** calculated for  $[M+H]^+$ : 257.1290, found: 257.1288.

### 2-(1-(1H-pyrazol-1-yl)cyclobutyl)-1-(4-methoxyphenyl)ethan-1-one (3ya)

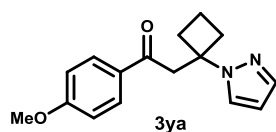

Following the General Procedure E, **3ya** was obtained in 47% yield as a white solid, mp 84-86 °C; **<sup>1</sup>H NMR (400 MHz, Chloroform-*d*):**  $\delta$  7.74 (d, *J* = 8.9 Hz, 2H), 7.53 (d, *J* = 2.3 Hz, 1H), 7.46 – 7.44 (d, *J* = 1.3 Hz, 1H), 6.82 (d, *J* = 8.9 Hz, 2H), 6.09 (t, *J* = 2.0 Hz, 1H), 3.83 (s, 3H), 3.65 (s, 2H), 2.78 – 2.68 (m, 2H), 2.64 (td, *J* = 8.2, 4.2 Hz, 2H), 2.01 (ddd, *J* = 11.9, 9.0, 4.9 Hz, 2H) ppm; **<sup>13</sup>C NMR (100 MHz, Chloroform-*d*):**  $\delta$  196.43, 163.62, 139.30, 130.35, 128.00, 113.63, 104.59, 62.73, 55.54, 46.00, 33.31, 15.04 ppm (only 12 carbon resonances were observed do to overlapping resonances); **HRMS (ESI, *m/z*):** calculated for  $[M+H]^+$ : 271.1447, found: 271.1442.

### 2-(1-(1H-pyrazol-1-yl)cyclopentyl)-1-(4-methoxyphenyl)ethan-1-one (3za)

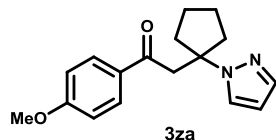

Following the General Procedure E, **3za** was obtained in 47% yield as a white solid, mp 89-96 °C; **<sup>1</sup>H NMR (400 MHz, Chloroform-*d*):**  $\delta$  7.71 (d, *J* = 8.9 Hz, 2H), 7.47 (d, *J* = 2.4 Hz, 1H), 7.46 (d, *J* = 1.5 Hz, 1H), 6.80 (d, *J* = 8.9 Hz, 2H), 6.06 (t, *J* = 2.1 Hz, 1H), 3.82 (s, 3H), 3.54 (s, 2H), 2.59 (ddd, *J* = 12.2, 5.8, 2.0 Hz, 2H), 2.14 (dt, *J* = 16.0, 8.3 Hz, 2H), 1.83 – 1.76 (m, 2H), 1.69 – 1.62 (m, 2H) ppm; **<sup>13</sup>C NMR (100 MHz, Chloroform-*d*):**  $\delta$  196.83, 163.51, 139.26, 130.46, 128.03, 113.55, 104.50, 70.63, 55.52, 47.00, 38.03, 22.75 ppm (only 12 carbon resonances were observed do to overlapping resonances); **HRMS (ESI, *m/z*):** calculated for  $[M+H]^+$ : 285.1603, found: 285.1599.

### 2-(1-(1H-pyrazol-1-yl)cyclohexyl)-1-(4-methoxyphenyl)ethan-1-one (3aaa)

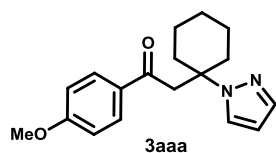

Following the General Procedure E, **3aaa** was obtained in 49% yield as a white solid, mp 88-97 °C; **<sup>1</sup>H NMR (400 MHz, Chloroform-*d*):**  $\delta$  7.63 (d, *J* = 9.0 Hz, 2H), 7.47 (d, *J* = 1.6 Hz, 1H), 7.42 (d, *J* = 2.2 Hz, 1H), 6.76 (d, *J* = 8.9 Hz, 2H), 6.06 (t, *J* = 2.1 Hz, 1H), 3.81 (s, 3H), 3.30 (s, 2H), 2.52 (d, *J* = 15.3 Hz, 2H), 2.05 (dt, *J* = 13.5, 7.0 Hz, 2H), 1.63 (dd, *J* = 10.5, 5.0 Hz, 2H), 1.52 – 1.41 (m, 2H), 1.42 – 1.33 (m, 2H) ppm; **<sup>13</sup>C NMR (100 MHz, Chloroform-*d*):**  $\delta$  196.97, 163.48, 139.01, 130.87, 130.54, 127.89, 113.46, 104.73, 62.37, 55.50, 48.82, 35.75, 25.29, 21.89 ppm; **HRMS (ESI, *m/z*):** calculated for  $[M+H]^+$ : 299.1760, found: 299.1755.

### 1-(4-methoxyphenyl)-3-(1H-pyrazol-1-yl)butan-1-one (3aba)

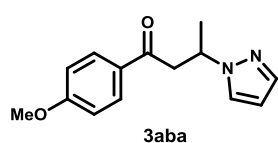

Following the General Procedure E, **3aba** was obtained in 47% yield as a colorless oil; <sup>1</sup>H NMR (400 MHz, Chloroform-*d*): δ 7.89 (d, *J* = 9.0 Hz, 2H), 7.49 (s, 1H), 7.47 (dd, *J* = 2.2, 0.8 Hz, 1H), 6.89 (d, *J* = 9.0 Hz, 2H), 6.17 – 6.15 (m, 1H), 5.04 (q, *J* = 6.7 Hz, 1H), 3.84 (s, 3H), 3.71 (dd, *J* = 17.0, 6.7 Hz, 1H), 3.27 (dd, *J* = 17.1, 6.4 Hz, 1H), 1.60 (d, *J* = 6.8 Hz, 3H) ppm; <sup>13</sup>C NMR (100 MHz, Chloroform-*d*): δ 196.02, 163.79, 139.43, 130.51, 129.80, 128.76, 113.84, 104.79, 55.59, 53.83, 45.02, 21.47 ppm; HRMS (ESI, *m/z*): calculated for [M+H]<sup>+</sup>: 245.1288, found: 245.1286.

### 1-(3-bromo-4-methoxyphenyl)-3-(1H-pyrazol-1-yl)butan-1-one (3aca)

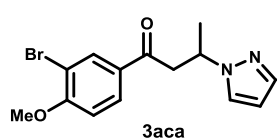

Following the General Procedure E, **3aca** was obtained in 65% yield as a white solid, mp 83-90°C; <sup>1</sup>H NMR (400 MHz, Chloroform-*d*): δ 8.12 (d, *J* = 2.2 Hz, 1H), 7.87 (dd, *J* = 8.6, 2.2 Hz, 1H), 7.50 (d, *J* = 1.6 Hz, 1H), 7.46 (d, *J* = 2.2 Hz, 1H), 6.89 (d, *J* = 8.7 Hz, 1H), 6.17 (t, *J* = 2.0 Hz, 1H), 5.03 (q, *J* = 6.7 Hz, 1H), 3.95 (s, 3H), 3.72 (dd, *J* = 17.1, 6.8 Hz, 1H), 3.24 (dd, *J* = 17.1, 6.2 Hz, 1H), 1.61 (d, *J* = 6.8 Hz, 3H) ppm; <sup>13</sup>C NMR (100 MHz, Chloroform-*d*): δ 195.05, 159.91, 139.53, 133.73, 130.75, 129.43, 128.77, 112.10, 111.15, 104.88, 56.61, 53.76, 45.00, 21.48 ppm; HRMS (ESI, *m/z*): calculated for [M+H]<sup>+</sup>: 323.0395, found: 323.0391.

### 7-(3-bromo-4-methoxyphenyl)-7-oxo-5-(1H-pyrazol-1-yl)heptyl acetate (3ada)

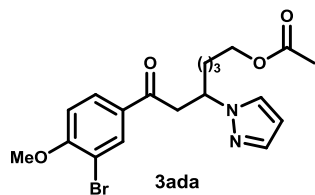

Following the General Procedure E, **3ada** was obtained in 62% yield as a white solid, mp 122-127 °C; <sup>1</sup>H NMR (400 MHz, Chloroform-*d*): δ 8.10 (d, *J* = 2.1 Hz, 1H), 7.84 (dd, *J* = 8.6, 2.2 Hz, 1H), 7.49 (d, *J* = 1.8 Hz, 1H), 7.44 (d, *J* = 2.1 Hz, 1H), 6.87 (d, *J* = 8.7 Hz, 1H), 6.14 (t, *J* = 2.1 Hz, 1H), 4.81 (ddt, *J* = 9.9, 7.3, 4.9 Hz, 1H), 3.98 (td, *J* = 6.6, 4.9 Hz, 2H), 3.93 (s, 3H), 3.72 (dd, *J* = 17.2, 7.4 Hz, 1H), 3.24 (dd, *J* = 17.2, 5.4 Hz, 1H), 2.14 – 2.05 (m, 1H), 2.00 (s, 3H), 1.82 (ddt, *J* = 14.1, 10.2, 5.1 Hz, 1H), 1.65 – 1.52 (m, 2H), 1.25 (ddt, *J* = 11.5, 5.6, 2.4 Hz, 1H), 1.07 (ddt, *J* = 13.3, 9.8, 5.1 Hz, 1H) ppm; <sup>13</sup>C NMR (100 MHz, Chloroform-*d*): δ 194.98, 171.16, 159.81, 139.78, 133.61, 130.55, 130.18, 129.34, 111.98, 111.04, 104.50, 64.11, 57.98, 56.52, 43.68, 34.89, 28.03, 22.56, 20.99 ppm; HRMS (ESI, *m/z*): calculated for [M+H]<sup>+</sup>: 423.0919, found: 423.0913.

### 7-(3-bromo-4-methoxyphenyl)-7-oxo-5-(1H-pyrazol-1-yl)heptyl dimethylcarbamate (3aea)

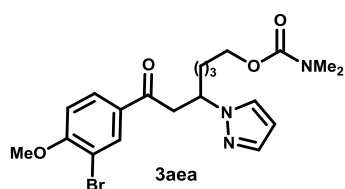

Following the General Procedure E, **3aea** was obtained in 64% yield as a white solid, mp 119-125 °C; <sup>1</sup>H NMR (400 MHz, Chloroform-*d*): δ 8.09 (d, *J* = 2.2 Hz, 1H), 7.84 (dd, *J* = 8.6, 2.2 Hz, 1H), 7.48 (d, *J* = 1.8 Hz, 1H), 7.43 (d, *J* = 2.3 Hz, 1H), 6.87 (d, *J* = 8.7 Hz, 1H), 6.12 (t, *J* = 2.0 Hz, 1H), 4.81 (ddt, *J* = 9.9, 7.5, 4.9 Hz, 1H), 3.97 (td, *J* = 6.5, 4.5 Hz, 2H), 3.92 (s, 3H), 3.72 (dd, *J* = 17.2, 7.6 Hz, 1H), 3.23 (dd, *J* = 17.2, 5.3 Hz, 1H), 2.84 (d, *J* = 21.6 Hz, 6H), 2.09 (ddd, *J* = 19.4, 10.3, 5.1 Hz, 1H), 1.83 (dt, *J* = 9.8, 5.7 Hz, 1H), 1.59 (ddd, *J* = 29.3, 13.7, 9.3, 4.9 Hz, 2H), 1.30 – 1.16 (m, 1H), 1.08 (ddt, *J* = 18.4, 10.0, 5.2 Hz, 1H) ppm; <sup>13</sup>C NMR (100 MHz, Chloroform-*d*): δ 195.00, 159.79, 156.65,

139.71, 133.60, 130.56, 130.16, 129.34, 111.96, 111.03, 104.44, 64.87, 57.99, 56.51, 43.66, 36.35, 35.81, 34.93, 28.52, 22.54 ppm; **HRMS (ESI, m/z)**: calculated for  $[M+H]^+$ : 452.1185, found: 452.1182.

**1-(3-bromo-4-methoxyphenyl)-7-((tert-butyldimethylsilyl)oxy)-3-(1H-pyrazol-1-yl)heptan-1-one (3afa)**

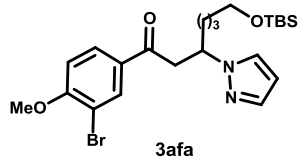

Following the General Procedure E, **3afa** was obtained in 62% yield as a white solid, mp 121-128 °C; **<sup>1</sup>H NMR (400 MHz, Chloroform-*d*)**:  $\delta$  8.11 (d,  $J = 2.2$  Hz, 1H), 7.85 (dd,  $J = 8.7, 2.2$  Hz, 1H), 7.49 (d,  $J = 1.8$  Hz, 1H), 7.44 (d,  $J = 1.9$  Hz, 1H), 6.87 (d,  $J = 8.7$  Hz, 1H), 6.13 (t,  $J = 2.1$  Hz, 1H), 4.81 (ddt,  $J = 9.9, 7.6, 4.9$  Hz, 1H), 3.93 (s, 3H), 3.74 (dd,  $J = 17.1, 7.7$  Hz, 1H), 3.53 (td,  $J = 6.5, 2.7$  Hz, 2H), 3.23 (dd,  $J = 17.1, 5.2$  Hz, 1H), 2.06 (ddt,  $J = 18.7, 10.1, 5.0$  Hz, 1H), 1.87 – 1.78 (m, 1H), 1.48 (dddd,  $J = 25.6, 15.3, 7.9, 4.8$  Hz, 2H), 1.24 (dddd,  $J = 13.4, 9.7, 6.7, 3.9$  Hz, 1H), 1.13 – 1.03 (m, 1H), 0.85 (s, 9H), -0.00 (s, 6H) ppm; **<sup>13</sup>C NMR (100 MHz, Chloroform-*d*)**:  $\delta$  195.11, 159.76, 139.68, 133.63, 130.64, 130.19, 129.35, 111.96, 111.01, 104.38, 62.82, 58.14, 56.50, 43.63, 35.19, 32.23, 25.96, 22.50, 18.33, -5.29 ppm; **HRMS (ESI, m/z)**: calculated for  $[M+H]^+$ : 495.1679, found: 495.1675.

**6-bromo-1-(4-methoxyphenyl)-3-(1H-pyrazol-1-yl)hexan-1-one (3aga)**

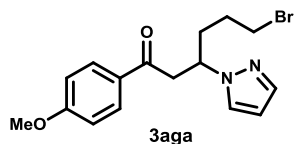

Following the General Procedure E, **3aga** was obtained in 50% yield as a white solid, mp 129-137 °C; **<sup>1</sup>H NMR (400 MHz, Chloroform-*d*)**:  $\delta$  7.87 (d,  $J = 8.9$  Hz, 2H), 7.50 (d,  $J = 1.8$  Hz, 1H), 7.46 (d,  $J = 2.2$  Hz, 1H), 6.88 (d,  $J = 8.9$  Hz, 2H), 6.15 (t,  $J = 2.1$  Hz, 1H), 4.91 – 4.81 (m, 1H), 3.83 (s, 3H), 3.73 (dd,  $J = 17.3, 7.3$  Hz, 1H), 3.33 – 3.29 (m, 2H), 3.30 – 3.24 (m, 1H), 2.18 (ddt,  $J = 15.2, 10.4, 5.2$  Hz, 1H), 2.01 (dp,  $J = 14.0, 5.2$  Hz, 1H), 1.82 – 1.69 (m, 1H), 1.63 – 1.49 (m, 1H) ppm; **<sup>13</sup>C NMR (100 MHz, Chloroform-*d*)**:  $\delta$  195.63, 163.75, 139.85, 130.41, 130.11, 129.56, 113.76, 104.65, 57.53, 55.51, 43.72, 33.90, 32.92, 29.40 ppm; **HRMS (ESI, m/z)**: calculated for  $[M+H]^+$ : 351.0708, found: 351.0710.

**methyl 12-(4-methoxyphenyl)-12-oxo-10-(1H-pyrazol-1-yl)dodecanoate (3aha)**

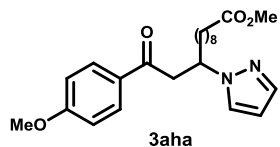

Following the General Procedure E, **3aha** was obtained in 45% yield as a white solid, mp 65-67 °C; **<sup>1</sup>H NMR (400 MHz, Chloroform-*d*)**  $\delta$  7.88 (d,  $J = 8.9$  Hz, 2H), 7.51 (d,  $J = 1.8$  Hz, 1H), 7.46 (d,  $J = 2.2$  Hz, 1H), 6.87 (d,  $J = 8.9$  Hz, 2H), 6.14 (t,  $J = 2.1$  Hz, 1H), 4.88 – 4.73 (m, 1H), 3.83 (s, 3H), 3.75 (dd,  $J = 17.2, 7.6$  Hz, 1H), 3.64 (s, 3H), 3.27 (dd,  $J = 17.2, 5.4$  Hz, 1H), 2.26 (t,  $J = 7.6$  Hz, 2H), 2.12 – 2.00 (m, 1H), 1.79 (ddt,  $J = 14.4, 9.6, 5.0$  Hz, 1H), 1.56 (p,  $J = 7.5$  Hz, 2H), 1.32 – 1.12 (m, 10H), 1.00 (tt,  $J = 10.2, 4.9$  Hz, 1H) ppm; **<sup>13</sup>C NMR (100 MHz, Chloroform-*d*)**:  $\delta$  196.14, 174.33, 163.73, 139.55, 130.46, 130.13, 129.81, 113.76, 104.34, 58.33, 55.51, 51.48, 43.75, 35.39, 34.11, 29.24, 29.12, 29.09, 29.05, 26.13, 24.93 ppm; **HRMS (ESI, m/z)**: calculated for  $[M+H]^+$ : 402.2468, found: 402.2471.



### 1-(4-methoxyphenyl)-4-phenyl-3-(1H-pyrazol-1-yl)butan-1-one (3aia)

Following the General Procedure E, **3aia** was obtained in 42% yield as a white solid, mp 72-77 °C; <sup>1</sup>H NMR (400 MHz, Chloroform-*d*): δ 7.91 (d, *J* = 9.0 Hz, 2H), 7.52 (d, *J* = 1.8 Hz, 1H), 7.24 – 7.16 (m, 3H), 7.12 (d, *J* = 2.0 Hz, 1H), 6.98 (d, *J* = 1.7 Hz, 1H), 6.97 (s, 1H), 6.90 (d, *J* = 8.9 Hz, 2H), 6.02 (t, *J* = 2.1 Hz, 1H), 5.03 (ddt, *J* = 10.6, 7.2, 5.4 Hz, 1H), 3.85 (s, 3H), 3.85 (dd, *J* = 17.3, 7.5 Hz, 1H), 3.41 (dd, *J* = 17.3, 5.5 Hz, 1H), 3.29 (dd, *J* = 13.5, 9.4 Hz, 1H), 3.16 (dd, *J* = 13.5, 5.2 Hz, 1H) ppm; <sup>13</sup>C NMR (100 MHz, Chloroform-*d*): δ 195.97, 163.85, 139.75, 137.99, 130.59, 130.54, 129.82, 129.13, 128.49, 126.72, 113.86, 104.28, 60.08, 55.59, 42.89, 42.02 ppm; HRMS (ESI, *m/z*): calculated for [M+H]<sup>+</sup>: 321.1603, found: 321.1596.

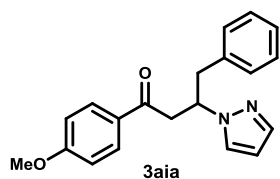

### 1-(4-methoxyphenyl)-5-phenyl-3-(1H-pyrazol-1-yl)pentan-1-one (3aja)

Following the General Procedure E, **3aja** was obtained in 45% yield as a white solid, mp 76-82 °C; <sup>1</sup>H NMR (400 MHz, Chloroform-*d*): δ 7.87 (d, *J* = 8.9 Hz, 2H), 7.55 (d, *J* = 1.8 Hz, 1H), 7.45 (d, *J* = 1.6 Hz, 1H), 7.30 – 7.23 (m, 2H), 7.18 (t, *J* = 7.3 Hz, 1H), 7.13 (d, *J* = 1.3 Hz, 1H), 7.11 (s, 1H), 6.88 (d, *J* = 8.9 Hz, 2H), 6.18 (t, *J* = 2.0 Hz, 1H), 4.85 (ddd, *J* = 10.5, 7.4, 5.5 Hz, 1H), 3.84 (s, 3H), 3.75 (dd, *J* = 17.2, 7.5 Hz, 1H), 3.28 (dd, *J* = 17.2, 5.4 Hz, 1H), 2.43 (tdd, *J* = 11.2, 8.9, 5.0 Hz, 3H), 2.16 (ddd, *J* = 11.1, 8.9, 5.1 Hz, 1H) ppm; <sup>13</sup>C NMR (100 MHz, Chloroform-*d*): δ 196.00, 163.81, 141.00, 139.92, 130.56, 130.50, 129.81, 128.53, 126.14, 113.83, 104.48, 57.61, 55.58, 43.86, 36.79, 32.30 ppm; HRMS (ESI, *m/z*): calculated for [M+H]<sup>+</sup>: 335.1760, found: 335.1755.

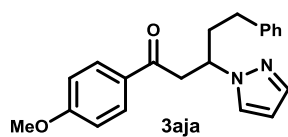

### 4-(4-methoxyphenyl)-4-oxo-2-(1H-pyrazol-1-yl)butyl acetate (3aka)

Following the General Procedure E, **3aka** was obtained in 22% yield as a colorless oil; <sup>1</sup>H NMR (400 MHz, Chloroform-*d*): δ 7.91 (d, *J* = 8.8 Hz, 2H), 7.52 (d, *J* = 2.6 Hz, 1H), 7.51 (s, 1H), 6.91 (d, *J* = 8.9 Hz, 2H), 6.19 (t, *J* = 2.1 Hz, 1H), 5.18 (tt, *J* = 7.4, 5.3 Hz, 1H), 4.55 – 4.36 (m, 2H), 3.86 (s, 3H), 3.82 (dd, *J* = 17.4, 7.5 Hz, 1H), 3.38 (dd, *J* = 17.5, 5.5 Hz, 1H), 2.00 (s, 3H) ppm; <sup>13</sup>C NMR (100 MHz, Chloroform-*d*): δ 194.77, 170.51, 163.98, 140.08, 130.56, 130.50, 129.50, 113.93, 105.10, 65.76, 56.41, 55.62, 39.73, 20.82 ppm; HRMS (ESI, *m/z*): calculated for [M+H]<sup>+</sup>: 303.1345, found: 303.1340.

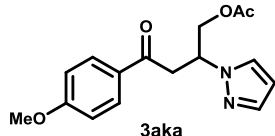

### 4-(4-(tert-butyl)phenyl)-4-oxo-2-(1H-pyrazol-1-yl)butyl acetate (3ala)

Following the General Procedure E, **3ala** was obtained in 20% yield as a white solid, mp 68-75 °C; <sup>1</sup>H NMR (400 MHz, Chloroform-*d*): δ 7.88 (d, *J* = 8.6 Hz, 2H), 7.54 (d, *J* = 2.0 Hz, 1H), 7.52 (d, *J* = 1.8 Hz, 1H), 7.46 (d, *J* = 8.5 Hz, 2H), 6.20 (t, *J* = 2.1 Hz, 1H), 5.20 (tt, *J* = 7.5, 5.2 Hz, 1H), 4.50 (dd, *J* = 11.2, 8.0 Hz, 1H), 4.43 (dd, *J* = 11.2, 5.2 Hz, 1H), 3.86 (dd, *J* = 17.8, 7.5 Hz, 1H), 3.41 (dd, *J* = 17.8, 5.4 Hz, 1H), 2.00 (s, 3H), 1.32 (s, 9H) ppm; <sup>13</sup>C NMR (100 MHz, Chloroform-*d*): δ 195.80, 170.43, 157.48, 140.00, 133.70, 130.43, 128.10, 125.66,

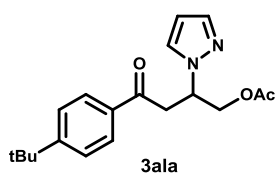

105.02, 65.63, 56.14, 39.88, 35.18, 31.05, 20.74 ppm; **HRMS (ESI, m/z)**: calculated for  $[M+H]^+$ : 329.1865, found: 329.1862.

**tert-butyl (3-(4-methoxyphenyl)-3-oxo-1-(1H-pyrazol-1-yl)propyl)carbamate (3ama)**

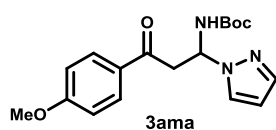

Following the General Procedure E, **3ama** was obtained in 65% yield as a white solid, mp 57-62 °C; **<sup>1</sup>H NMR (400 MHz, Chloroform-d)**:  $\delta$  7.86 (d,  $J$  = 8.9 Hz, 2H), 7.69 (bs, 1H), 7.46 (d,  $J$  = 1.7 Hz, 1H), 6.88 (d,  $J$  = 8.9 Hz, 2H), 6.45 (s, 1H), 6.33 (d,  $J$  = 9.4 Hz, 1H), 6.17 (t,  $J$  = 2.1 Hz, 1H), 3.85 – 3.82 (m, 3H), 3.81 – 3.63 (m, 2H), 1.40 (s, 9H) ppm; **<sup>13</sup>C NMR (100 MHz, Chloroform-d)**:  $\delta$  194.47, 163.87, 154.58, 139.81, 130.48, 129.76, 129.41, 113.81, 105.09, 80.42, 63.71, 55.50, 41.90, 29.70, 28.24 ppm; ; **HRMS (ESI, m/z)**: calculated for  $[M+H]^+$ : 346.1767, found: 346.1762.

**3-methoxy-1-(4-methoxyphenyl)-3-(1H-pyrazol-1-yl)propan-1-one (3ana)**

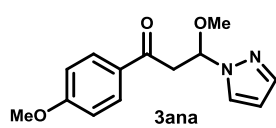

Following the General Procedure E, **3ana** was obtained in 75% yield as a colorless oil; **<sup>1</sup>H NMR (400 MHz, Chloroform-d)**:  $\delta$  7.90 (d,  $J$  = 9.0 Hz, 2H), 7.63 (dd,  $J$  = 2.4, 0.6 Hz, 1H), 7.57 (d,  $J$  = 1.7 Hz, 1H), 6.88 (d,  $J$  = 9.0 Hz, 2H), 6.29 – 6.25 (m, 1H), 5.85 (dd,  $J$  = 6.8, 5.1 Hz, 1H), 3.81 (s, 3H), 3.76 (dd,  $J$  = 16.9, 6.8 Hz, 1H), 3.59 (dd,  $J$  = 16.9, 5.0 Hz, 1H), 3.22 (s, 3H).ppm; **<sup>13</sup>C NMR (100 MHz, Chloroform-d)**:  $\delta$  194.33 , 163.90 , 140.49 , 130.64 , 129.63 , 129.13 , 113.88 , 105.88 , 88.37 , 56.31 , 55.55 , 43.75 ppm; **HRMS (ESI, m/z)**: calculated for  $[M+H]^+$ : 261.1234, found: 261.1232.

**1,3-diphenyl-3-(1H-pyrazol-1-yl)propan-1-one (3aoa)**

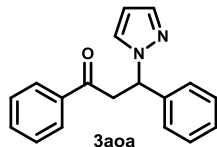

Following the General Procedure E, **3aoa** was obtained in 67% yield as a colorless oil; **<sup>1</sup>H NMR (400 MHz, Chloroform-d)**:  $\delta$  7.98 (dd,  $J$  = 8.3, 1.1 Hz, 1H), 7.58 – 7.53 (m, 1H), 7.52 (d,  $J$  = 1.5 Hz, 1H), 7.50 (d,  $J$  = 2.3 Hz, 1H), 7.44 (t,  $J$  = 7.6 Hz, 2H), 7.34 (d,  $J$  = 4.4 Hz, 4H), 7.29 (dd,  $J$  = 8.1, 4.2 Hz, 1H), 6.24 (t,  $J$  = 2.1 Hz, 1H), 6.12 (dd,  $J$  = 8.4, 5.2 Hz, 1H), 4.50 (dd,  $J$  = 17.6, 8.4 Hz, 1H), 3.65 (dd,  $J$  = 17.6, 5.2 Hz, 1H) ppm; **<sup>13</sup>C NMR (100 MHz, Chloroform-d)**:  $\delta$  196.72, 140.81, 139.39, 136.59, 133.50, 129.89, 128.90, 128.72, 128.31, 128.11, 126.79, 105.69, 60.88, 44.27 ppm; **HRMS (ESI, m/z)**: calculated for  $[M+H]^+$ : 277.1341, found: 277.1337.

**1-(4-methoxyphenyl)-3-phenyl-3-(1H-pyrazol-1-yl)propan-1-one (3apa)**

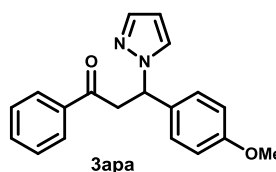

Following the General Procedure E, **3apa** was obtained in 44% yield; Following the one-pot General Procedure F, **3apa** was obtained in 30% total yield as a colorless oil; **<sup>1</sup>H NMR (400 MHz, Chloroform-d)**:  $\delta$  7.97 (d,  $J$  = 7.1 Hz, 2H), 7.60 – 7.51 (m, 1H), 7.50 (d,  $J$  = 1.8 Hz, 1H), 7.47 (d,  $J$  = 2.2 Hz, 1H), 7.44 (dd,  $J$  = 8.4, 7.1 Hz, 2H), 7.29 (d,  $J$  = 8.7 Hz, 2H), 6.85 (d,  $J$  = 8.7 Hz, 2H), 6.21 (t,  $J$  = 2.1 Hz, 1H), 6.05 (dd,  $J$  = 8.1, 5.6 Hz, 1H), 4.43 (dd,  $J$  = 17.5, 8.1 Hz, 1H), 3.77 (s, 3H), 3.65 (dd,  $J$  = 17.5, 5.6 Hz, 1H) ppm; **<sup>13</sup>C NMR (100 MHz, Chloroform-d)**:  $\delta$  196.74, 159.26, 139.28, 136.53, 133.40, 132.67, 129.57, 128.64, 128.22, 128.07, 114.12, 105.48, 60.34, 55.29, 44.23 ppm; **HRMS (ESI, m/z)**: calculated for  $[M+H]^+$ : 307.1447, found: 307.1444.

### 1-(4-methoxyphenyl)-3-phenyl-3-(1H-pyrazol-1-yl)propan-1-one (3apa')

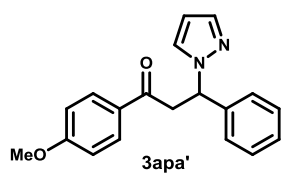

<sup>1</sup>H NMR (400 MHz, Chloroform-d): δ 7.96 (d, *J* = 9.1 Hz, 2H), 7.51 (d, *J* = 1.8 Hz, 1H), 7.49 (dd, *J* = 2.3, 0.6 Hz, 1H), 7.32 (d, *J* = 4.5 Hz, 4H), 6.91 (d, *J* = 9.0 Hz, 2H), 6.22 (dd, *J* = 1.9 Hz, 1H), 6.11 (dd, *J* = 8.4, 5.3 Hz, 1H), 4.42 (dd, *J* = 17.4, 8.4 Hz, 1H), 3.85 (s, 3H), 3.60 (dd, *J* = 17.4, 5.3 Hz, 1H) ppm;

<sup>13</sup>C NMR (100 MHz, Chloroform-d): δ 195.16, 163.81, 140.93, 139.37, 130.62, 129.86, 129.71, 128.85, 128.01, 126.78, 113.84, 105.59, 61.00, 55.58, 43.88 ppm;

HRMS (ESI, *m/z*): calculated for [M+H]<sup>+</sup>: 307.1447, found: 307.1443.

### 1-(4-methoxyphenyl)-3-(1H-pyrazol-1-yl)-3-(4-(trifluoromethyl)phenyl)propan-1-one (3aqa)

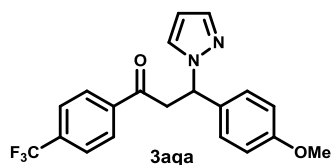

Following the one-pot General Procedure F, **3aqa** was obtained in 56% total yield as a white solid, mp 63-65 °C;

<sup>1</sup>H NMR (400 MHz, Chloroform-d): δ 8.07 (d, *J* = 8.1 Hz, 2H), 7.71 (d, *J* = 8.2 Hz, 2H), 7.49 (d, *J* = 1.8 Hz, 1H), 7.45 (d, *J* = 2.3 Hz, 1H), 7.28 (d, *J* = 8.8 Hz, 2H), 6.86 (d, *J* = 8.7 Hz, 2H), 6.22 (t, *J* = 2.1 Hz, 1H), 6.03 (dd, *J* = 8.4, 5.3 Hz, 1H), 4.49 (dd, *J* = 17.5, 8.4 Hz, 1H), 3.78 (s, 3H), 3.59 (dd, *J* = 17.5, 5.3 Hz, 1H) ppm;

<sup>13</sup>C NMR (100 MHz, Chloroform-d): δ 196.03, 159.39, 139.25, 134.57 (q, *J* = 32.6 Hz), 132.39, 129.60, 128.57, 127.98, 125.70 (q, *J* = 3.7 Hz), 114.19, 105.69, 60.28, 55.30, 44.52 ppm;

HRMS (ESI, *m/z*): calculated for [M+Na]<sup>+</sup>: 397.1140, found: 397.1132.

### 1-(4-methoxyphenyl)-3-(1H-pyrazol-1-yl)-3-(4-(trifluoromethyl)phenyl)propan-1-one (3aqa')

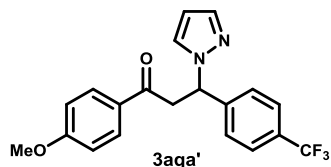

<sup>1</sup>H NMR (400 MHz, Chloroform-d): δ 7.95 (d, *J* = 9.0 Hz, 2H), 7.57 (d, *J* = 8.2 Hz, 2H), 7.54 (d, *J* = 1.8 Hz, 1H), 7.52 (d, *J* = 2.3 Hz, 1H), 7.45 (d, *J* = 8.4 Hz, 2H), 6.90 (d, *J* = 9.0 Hz, 2H), 6.25 – 6.23 (m, 1H), 6.17 (dd, *J* = 8.0, 5.6 Hz, 1H), 4.40 (dd, *J* = 17.5, 8.0 Hz, 1H), 3.83 (s, 3H), 3.64 (dd, *J* = 17.5, 5.6 Hz, 1H) ppm;

<sup>13</sup>C NMR (100 MHz, Chloroform-d): δ 194.65, 163.99, 144.95, 139.79, 130.63, 130.02, 129.45, 127.23, 125.81 (d, *J* = 3.7 Hz), 113.93, 105.95, 60.51, 55.56, 43.78 ppm; HRMS (ESI, *m/z*): calculated for [M+Na]<sup>+</sup>: 397.1140, found: 397.1137.

### 3-(4-methoxyphenyl)-1-(naphthalen-2-yl)-3-(1H-pyrazol-1-yl)propan-1-one (3ara)

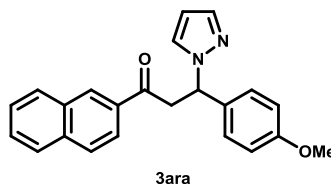

Following the General Procedure E, **3ara** was obtained in 63% yield; Following the one-pot General Procedure F,

**3ara** was obtained in 43% total yield as a white solid, mp 80-92 °C; <sup>1</sup>H NMR (400 MHz, Chloroform-d): δ 8.53 (s, 1H), 8.01 (dd, *J* = 8.7, 1.8 Hz, 1H), 7.94 (d, *J* = 8.0 Hz, 1H),

7.87 (d, *J* = 4.3 Hz, 1H), 7.85 (d, *J* = 3.6 Hz, 1H), 7.62 – 7.57 (m, 1H), 7.56 – 7.54 (m, 1H), 7.53 (d, *J* = 1.9 Hz, 1H), 7.51 (d, *J* = 2.3 Hz, 1H), 7.34 (d, *J* = 8.7 Hz, 2H), 6.87 (d, *J* = 8.7 Hz, 2H), 6.23 (t, *J* = 2.1 Hz, 1H), 6.12 (dd, *J* = 8.0, 5.7 Hz, 1H), 4.58 (dd, *J* = 17.5, 8.0 Hz, 1H), 3.81 (dd, *J* = 17.4, 5.8 Hz, 1H), 3.78 (s, 3H) ppm; <sup>13</sup>C NMR (100 MHz, Chloroform-d): δ 196.66, 159.29, 139.35, 135.71, 133.85, 132.69, 132.46,

130.19, 129.66, 128.64, 128.48, 128.10, 127.77, 126.84, 123.75, 114.14, 105.53, 60.49, 55.30, 44.26 ppm; **HRMS (ESI, m/z)**: calculated for [M+H]<sup>+</sup>: 357.1603, found: 357.1595.

**1-(4-methoxyphenyl)-3-(naphthalen-2-yl)-3-(1H-pyrazol-1-yl)propan-1-one (3ara')**

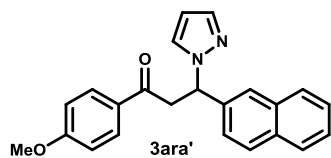

**<sup>1</sup>H NMR (400 MHz, Chloroform-*d*)**: δ 7.98 (d, *J* = 8.4 Hz, 2H), 7.84 – 7.73 (m, 4H), 7.54 (dd, *J* = 5.7, 1.5 Hz, 2H), 7.51 – 7.43 (m, 3H), 6.91 (d, *J* = 9.0 Hz, 2H), 6.28 (dd, *J* = 8.2, 5.4 Hz, 1H), 6.24 (t, *J* = 1.6 Hz, 1H), 4.51 (dd, *J* = 17.4, 8.2 Hz, 1H), 3.85 (s, 3H), 3.71 (dd, *J* = 17.4, 5.4 Hz, 1H)

ppm; **<sup>13</sup>C NMR (100 MHz, Chloroform-*d*)**: δ 195.13, 163.84, 139.44, 138.26, 133.32, 133.01, 130.65, 129.94, 129.71, 128.76, 128.20, 127.71, 126.42, 126.31, 125.80, 124.69, 113.86, 105.71, 61.16, 55.58, 43.80 ppm; **HRMS (ESI, m/z)**: calculated for [M+H]<sup>+</sup>: 357.1603, found: 357.1599.

**3-(1H-pyrazol-1-yl)-3,4-dihydronaphthalen-1(2H)-one (3asa)**

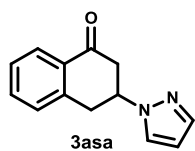

Following the General Procedure E, **3asa** was obtained in 30% yield as a colorless oil; **<sup>1</sup>H NMR (400 MHz, Chloroform-*d*)**: δ 7.75 (d, *J* = 7.7 Hz, 1H), 7.57 (td, *J* = 7.5, 1.3 Hz, 1H), 7.46 (d, *J* = 1.8 Hz, 1H), 7.43 – 7.39 (m, 2H), 7.36 (t, *J* = 7.5 Hz, 1H), 6.19 (t, *J* = 2.1 Hz, 1H),

4.66 (dd, *J* = 14.0, 4.5 Hz, 1H), 4.45 (dd, *J* = 14.0, 7.2 Hz, 1H), 3.28 (dd, *J* = 16.8, 7.9 Hz, 1H), 3.22 – 3.15 (m, 1H), 3.09 (dd, *J* = 16.7, 4.1 Hz, 1H) ppm; **<sup>13</sup>C NMR (100 MHz, Chloroform-*d*)**: δ 205.67, 153.78, 139.55, 136.28, 135.27, 129.76, 127.64, 126.73, 124.13, 105.88, 51.91, 48.75, 30.67 ppm; **HRMS (ESI, m/z)**: calculated for [M+H]<sup>+</sup>: 213.1028, found: 213.1026.

**3-ethyl-3-(1H-pyrazol-1-yl)-3,4-dihydronaphthalen-1(2H)-one (3ata)**

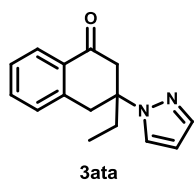

Following the General Procedure E, **3ata** was obtained in 40% yield as a white solid, mp 42-47 °C; **<sup>1</sup>H NMR (400 MHz, Chloroform-*d*)**: δ 7.97 (d, *J* = 7.6 Hz, 1H), 7.48 (t, *J* = 7.1 Hz, 1H), 7.44 (d, *J* = 1.7 Hz, 1H), 7.41 (d, *J* = 2.2 Hz, 1H), 7.29 (d, *J* = 4.9 Hz, 2H), 6.13 (t, *J* = 2.1 Hz, 1H), 3.80 (d, *J* = 16.5 Hz, 1H), 3.50 (dd, *J* = 16.9, 2.2 Hz,

1H), 3.45 (d, *J* = 16.4 Hz, 1H), 3.01 (d, *J* = 16.8 Hz, 1H), 2.08 (dq, *J* = 14.8, 7.4 Hz, 1H), 1.96 (dq, *J* = 14.6, 7.4 Hz, 1H), 0.68 (t, *J* = 7.4 Hz, 3H) ppm; **<sup>13</sup>C NMR (100 MHz, Chloroform-*d*)**: δ 195.30, 140.15, 139.14, 134.27, 131.61, 129.18, 127.37, 127.15, 126.86, 105.22, 64.79, 47.69, 40.21, 34.23, 7.41 ppm; **HRMS (ESI, m/z)**: calculated for [M+H]<sup>+</sup>: 241.1341, found: 241.1340.

**7-(1H-pyrazol-1-yl)-6,7,8,9-tetrahydro-5H-benzo[7]annulen-5-one (3aua)**

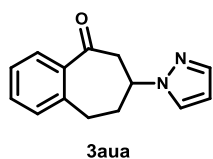

Following the General Procedure E, **3aua** was obtained in 68% yield as a yellow oil; **<sup>1</sup>H NMR (400 MHz, Chloroform-*d*)**: δ 8.03 (d, *J* = 7.9 Hz, 1H), 7.49 (dd, *J* = 4.7, 1.9 Hz, 2H), 7.45 (dd, *J* = 7.5, 1.4 Hz, 1H), 7.30 (t, *J* = 7.6 Hz, 1H), 7.21 (d, *J* = 7.7 Hz, 1H), 6.23 (t, *J* = 2.1 Hz, 1H), 4.77 (dd, *J* = 14.1, 4.9 Hz, 1H), 4.39 (dd, *J* = 14.1, 7.1

Hz, 1H), 3.07 (ddt, *J* = 13.5, 7.2, 4.9 Hz, 1H), 3.00 (dd, *J* = 11.9, 4.4 Hz, 1H), 2.97 – 2.90 (m, 1H), 2.11 (dq, *J* = 12.6, 4.2 Hz, 1H), 1.78 (qd, *J* = 13.2, 4.9 Hz, 1H) ppm; **<sup>13</sup>C NMR (100 MHz, Chloroform-*d*)**: δ 197.81, 144.15, 139.45, 133.77, 132.24, 130.45,

128.92, 127.51, 126.83, 105.58, 51.72, 48.85, 28.89, 27.07 ppm; **HRMS (ESI, m/z)**: calculated for  $[M+H]^+$ : 227.1184, found: 227.1181.

### (2-(1H-pyrazol-1-yl)cyclohexyl)(4-methoxyphenyl)methanone (**3ava**)

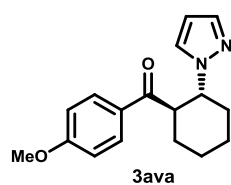

Following the General Procedure E, **3ava** was obtained in 52% yield as a white solid, mp 62-67 °C; **<sup>1</sup>H NMR (400 MHz, Chloroform-d)**:  $\delta$  7.83 (d,  $J$  = 8.9 Hz, 2H), 7.36 (d,  $J$  = 1.8 Hz, 1H), 7.34 (d,  $J$  = 2.3 Hz, 1H), 6.84 (d,  $J$  = 8.9 Hz, 2H), 6.00 (t,  $J$  = 2.0 Hz, 1H), 4.57 (dt,  $J$  = 10.9, 5.4 Hz, 1H), 4.08 (td,  $J$  = 11.0, 3.5 Hz, 1H), 3.82 (s, 3H), 2.14 (dt,  $J$  = 17.0, 9.2 Hz, 2H), 2.06 – 1.88 (m, 2H), 1.88 – 1.81 (m, 1H), 1.71 (s, 1H), 1.54 – 1.46 (m, 2H) ppm; **<sup>13</sup>C NMR (100 MHz, Chloroform-d)**:  $\delta$  200.81, 163.64, 139.24, 130.70, 129.81, 129.30, 113.71, 104.28, 61.41, 55.53, 49.98, 32.75, 30.60, 25.17 ppm; **HRMS (ESI, m/z)**: calculated for  $[M+H]^+$ : 285.1603, found: 285.1598.

### (3-(1H-pyrazol-1-yl)-1,2,3,4-tetrahydronaphthalen-2-yl)(4-methoxyphenyl)methanone (**3awa**)

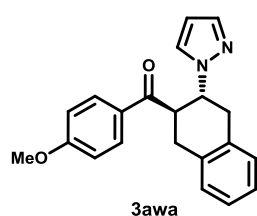

Following the General Procedure E, **3awa** was obtained in 38% yield as a white solid, mp 77-83 °C; **<sup>1</sup>H NMR (400 MHz, Chloroform-d)**:  $\delta$  7.90 (d,  $J$  = 8.9 Hz, 2H), 7.43 (d,  $J$  = 2.2 Hz, 1H), 7.40 (d,  $J$  = 1.8 Hz, 1H), 7.18 (dt,  $J$  = 7.6, 4.2 Hz, 3H), 7.12 – 7.09 (m, 1H), 6.87 (d,  $J$  = 8.9 Hz, 2H), 6.07 (t,  $J$  = 2.1 Hz, 1H), 4.97 (td,  $J$  = 10.9, 5.6 Hz, 1H), 4.57 – 4.48 (m, 1H), 3.84 (s, 3H), 3.72 (dd,  $J$  = 16.7, 11.2 Hz, 1H), 3.29 (dd,  $J$  = 16.7, 5.6 Hz, 1H), 3.14 (d,  $J$  = 8.4 Hz, 2H) ppm; **<sup>13</sup>C NMR (100 MHz, Chloroform-d)**:  $\delta$  200.03, 163.85, 139.65, 134.20, 134.02, 130.89, 130.28, 129.27, 128.92, 128.42, 126.55, 126.49, 113.81, 104.70, 59.18, 55.57, 46.51, 35.76, 33.98 ppm; **HRMS (ESI, m/z)**: calculated for  $[M+H]^+$ : 333.1603, found: 333.1607.

### benzyl 3-(4-methoxybenzoyl)-4-(1H-pyrazol-1-yl)cyclopentane-1-carboxylate (**3axa**)

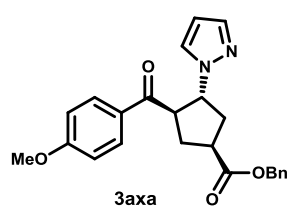

Following the General Procedure E, **3axa** was obtained in 45% yield as a white solid, mp 69-77 °C; **<sup>1</sup>H NMR (400 MHz, Chloroform-d)**:  $\delta$  7.81 (d,  $J$  = 8.9 Hz, 2H), 7.51 (d,  $J$  = 1.8 Hz, 1H), 7.39 (dd,  $J$  = 2.3, 0.6 Hz, 1H), 7.40 – 7.29 (m, 5H), 6.86 (d,  $J$  = 8.9 Hz, 2H), 6.14 (t,  $J$  = 2.1 Hz, 1H), 5.22 – 5.11 (m, 1H), 5.17 (s, 2H), 4.36 (dt,  $J$  = 10.1, 7.4 Hz, 1H), 3.84 (s, 3H), 3.10 (dt,  $J$  = 17.0, 7.9 Hz, 1H), 2.76 – 2.57 (m, 3H), 2.17 (ddd,  $J$  = 13.3, 8.8, 7.1 Hz, 1H) ppm; **<sup>13</sup>C NMR (100 MHz, Chloroform-d)**:  $\delta$  198.48, 174.22, 163.94, 139.94, 135.90, 131.07, 129.66, 128.97, 128.71, 128.41, 128.33, 113.93, 105.18, 66.81, 63.49, 55.60, 51.24, 41.58, 36.26, 32.73 ppm. **HRMS (ESI, m/z)**: calculated for  $[M+H]^+$ : 405.1814, found: 405.1807.

### 1-(4-methoxyphenyl)-3-(1H-pyrazol-1-yl)tridecan-1-one (**3aya**)

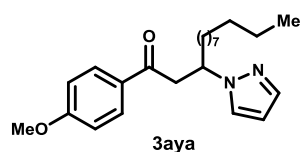

Following the one-pot General Procedure F, **3aya** was obtained in 39% yield as a white solid, mp 59-62 °C; **<sup>1</sup>H NMR (400 MHz, Chloroform-d)**:  $\delta$  7.88 (d,  $J$  = 8.9 Hz, 2H), 7.49 (d,  $J$  = 1.7 Hz, 1H), 7.44 (d,  $J$  = 2.2 Hz, 1H), 6.87 (d,  $J$

= 8.9 Hz, 2H), 6.13 (t,  $J = 2.1$  Hz, 1H), 4.83 (ddt,  $J = 10.1, 7.4, 5.0$  Hz, 1H), 3.82 (s, 3H), 3.72 (dd,  $J = 17.1, 7.4$  Hz, 1H), 3.26 (dd,  $J = 17.1, 5.4$  Hz, 1H), 2.04 (dtd,  $J = 14.3, 9.6, 4.8$  Hz, 1H), 1.79 (ddt,  $J = 14.3, 9.5, 4.8$  Hz, 1H), 1.31 – 1.12 (m, 16H), 0.86 (t,  $J = 6.8$  Hz, 3H) ppm;  $^{13}\text{C}$  NMR (100 MHz, Chloroform-*d*):  $\delta$  196.11, 163.65, 139.51, 130.41, 130.06, 129.77, 113.69, 104.24, 58.28, 55.46, 43.71, 35.40, 31.90, 29.55, 29.52, 29.44, 29.31, 29.12, 26.15, 22.68, 14.14 ppm; HRMS (ESI, *m/z*): calculated for  $[\text{M}+\text{H}]^+$ : 371.2699, found: 371.2695.

**2-(3-(4-methoxyphenyl)-3-(1H-pyrazol-1-yl)propanoyl)dibenzo[b,e]oxepin-11(6H)-one (3aza)**

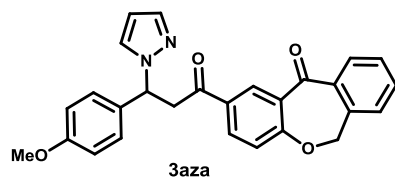

Following the one-pot General Procedure F, **3aza** was obtained in 54% total yield as a white solid, mp 146–149 °C;  $^1\text{H}$  NMR (400 MHz, Chloroform-*d*):  $\delta$  8.87 (d,  $J = 2.3$  Hz, 1H), 8.08 (dd,  $J = 8.7, 2.4$  Hz, 1H), 7.85 (dd,  $J = 7.6, 1.4$  Hz, 1H), 7.59 (td,  $J = 7.5, 1.4$  Hz, 1H), 7.51 (dd,  $J = 7.6, 1.3$  Hz, 1H), 7.48 (dd,  $J = 6.7, 2.1$  Hz, 2H), 7.39 (d,  $J = 7.4$  Hz, 1H), 7.30 (d,  $J = 8.7$  Hz, 2H), 7.08 (d,  $J = 8.7$  Hz, 1H), 6.87 (d,  $J = 8.7$  Hz, 2H), 6.21 (t,  $J = 2.1$  Hz, 1H), 6.06 (dd,  $J = 8.3, 5.3$  Hz, 1H), 5.24 (s, 2H), 4.48 (dd,  $J = 17.6, 8.4$  Hz, 1H), 3.78 (s, 3H), 3.67 (dd,  $J = 17.6, 5.4$  Hz, 1H) ppm;  $^{13}\text{C}$  NMR (100 MHz, Chloroform-*d*):  $\delta$  194.89, 190.54, 164.74, 159.29, 140.46, 139.20, 134.57, 134.43, 133.57, 133.10, 132.58, 130.70, 129.68, 129.45, 129.34, 128.10, 128.07, 124.44, 121.49, 114.15, 105.50, 73.49, 60.33, 55.31, 43.98 ppm; HRMS (ESI, *m/z*): calculated for  $[\text{M}+\text{H}]^+$ : 439.1658, found: 439.1659.

**2-(3-(4-methoxyphenyl)-3-oxo-1-(1H-pyrazol-1-yl)propyl)dibenzo[b,e]oxepin-11(6H)-one (3aza')**

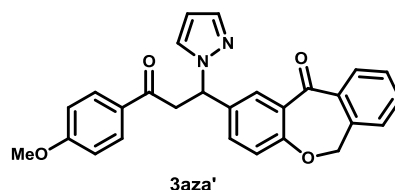

Following the one-pot General Procedure F, **3aza'** was obtained in 15% total yield as a white solid, mp 152–159 °C;  $^1\text{H}$  NMR (400 MHz, Chloroform-*d*):  $\delta$  8.25 (d,  $J = 2.4$  Hz, 1H), 7.96 (d,  $J = 8.9$  Hz, 2H), 7.87 (dd,  $J = 7.6, 1.3$  Hz, 1H), 7.56 (td,  $J = 7.4, 1.4$  Hz, 1H), 7.53 (d,  $J = 2.3$  Hz, 1H), 7.51 (d,  $J = 1.9$  Hz, 1H), 7.50 – 7.44 (m, 2H), 7.35 (d,  $J = 7.4$  Hz, 1H), 7.02 (d,  $J = 8.6$  Hz, 1H), 6.91 (d,  $J = 8.9$  Hz, 2H), 6.22 (t,  $J = 2.1$  Hz, 1H), 6.13 (dd,  $J = 8.2, 5.4$  Hz, 1H), 5.17 (s, 2H), 4.40 (dd,  $J = 17.4, 8.3$  Hz, 1H), 3.86 (s, 3H), 3.65 (dd,  $J = 17.4, 5.5$  Hz, 1H) ppm;  $^{13}\text{C}$  NMR (100 MHz, Chloroform-*d*):  $\delta$  194.85, 190.73, 163.77, 160.92, 140.38, 139.62, 135.39, 134.35, 134.06, 132.85, 130.56, 130.16, 129.69, 129.52, 129.33, 127.84, 125.04, 121.45, 113.78, 105.56, 73.59, 60.18, 55.52, 43.44 ppm; HRMS (ESI, *m/z*): calculated for  $[\text{M}+\text{H}]^+$ : 439.1658, found: 439.1656.

**3-(4-bromo-1H-pyrazol-1-yl)-1-(4-bromophenyl)-3-methylbutan-1-one (3bb)**

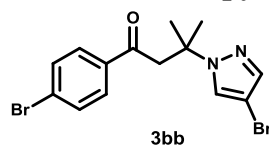

Following the General Procedure E, **3bb** was obtained in 77% yield as a white solid, mp 65–69 °C;  $^1\text{H}$  NMR (400 MHz, Chloroform-*d*):  $\delta$  7.67 (d,  $J = 8.6$  Hz, 2H), 7.53 (d,  $J = 8.6$  Hz, 2H), 7.52 (s, 1H), 7.40 (s, 1H), 3.50 (s, 2H), 1.74 (s, 6H) ppm;  $^{13}\text{C}$  NMR (100 MHz, Chloroform-*d*):  $\delta$  196.36, 139.58, 136.03, 131.89, 129.61,

128.54, 127.02, 92.38, 60.52, 48.55, 27.87 ppm; **HRMS (ESI, m/z)**: calculated for  $[M+H]^+$ : 384.9551, found: 384.9546.

#### 1-(4-bromophenyl)-3-(4-chloro-1H-pyrazol-1-yl)-3-methylbutan-1-one (3bc)

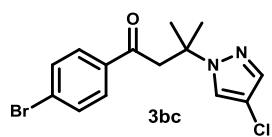

Following the General Procedure E, **3bc** was obtained in 70% yield as a white solid, mp 61-65 °C; **<sup>1</sup>H NMR (400 MHz, Chloroform-*d*)**:  $\delta$  7.68 (d,  $J$  = 8.7 Hz, 2H), 7.53 (d,  $J$  = 8.6 Hz, 2H), 7.49 (s, 1H), 7.37 (s, 1H), 3.50 (s, 2H), 1.73 (s, 6H) ppm; **<sup>13</sup>C NMR (100 MHz, Chloroform-*d*)**:  $\delta$  196.36, 137.44, 136.03, 131.88, 129.62, 128.53, 124.91, 109.22, 60.47, 48.48, 27.86 ppm; **HRMS (ESI, m/z)**: calculated for  $[M+H]^+$ : 341.0056, found: 341.0050.

#### 1-(4-bromophenyl)-3-methyl-3-(4-methyl-1H-pyrazol-1-yl)butan-1-one (3bd)

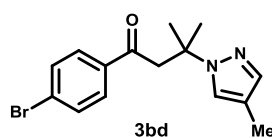

Following the General Procedure E, **3bd** was obtained in 55% yield as a colorless oil; **<sup>1</sup>H NMR (400 MHz, Chloroform-*d*)**:  $\delta$  7.65 (d,  $J$  = 8.6 Hz, 2H), 7.50 (d,  $J$  = 8.7 Hz, 2H), 7.26 (s, 1H), 7.23 (s, 1H), 3.49 (s, 2H), 1.98 (s, 3H), 1.73 (s, 6H) ppm; **<sup>13</sup>C NMR (100 MHz, Chloroform-*d*)**:  $\delta$  197.02, 139.39, 136.12, 131.61, 129.63, 128.18, 125.30, 115.18, 59.28, 49.09, 27.94, 8.89 ppm; **HRMS (ESI, m/z)**: calculated for  $[M+H]^+$ : 260.0603, found: 260.0595.

#### 1-(4-bromophenyl)-3-methyl-3-(1H-pyrazol-1-yl)butan-1-one (3be)

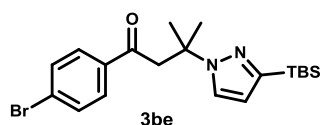

Following the General Procedure E, **3be** was obtained in 53% yield as a white solid, mp 52-59 °C; **<sup>1</sup>H NMR (400 MHz, Chloroform-*d*)**:  $\delta$  7.59 (d,  $J$  = 8.5 Hz, 2H), 7.46 (d,  $J$  = 8.5 Hz, 2H), 7.44 (d,  $J$  = 2.2 Hz, 1H), 6.20 (d,  $J$  = 2.2 Hz, 1H), 3.50 (s, 2H), 1.78 (s, 6H), 0.19 (s, 9H) ppm; **<sup>13</sup>C NMR (100 MHz, Chloroform-*d*)**:  $\delta$  197.80, 152.35, 136.53, 131.67, 129.89, 128.14, 126.15, 111.08, 59.97, 49.37, 28.60, -0.82 ppm; **HRMS (ESI, m/z)**: calculated for  $[M+H]^+$ : 421.1311, found: 421.1302.

#### 1-(4-methoxyphenyl)-3-(1H-pyrazol-1-yl)tridecan-1-one (3aye)

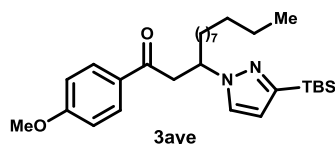

Following the General Procedure E, **3aye** was obtained in 33% yield as a white solid, mp 68-72 °C; **<sup>1</sup>H NMR (400 MHz, Chloroform-*d*)**:  $\delta$  7.87 (d,  $J$  = 8.9 Hz, 2H), 7.41 (d,  $J$  = 2.1 Hz, 1H), 6.87 (d,  $J$  = 8.8 Hz, 2H), 6.24 (d,  $J$  = 2.2 Hz, 1H), 4.92 – 4.79 (m, 1H), 3.85 (s, 3H), 3.77 (dd,  $J$  = 16.5, 7.3 Hz, 1H), 3.20 (dd,  $J$  = 16.5, 5.6 Hz, 1H), 2.12 – 1.97 (m, 1H), 1.90 – 1.75 (m, 1H), 1.32 – 1.15 (m, 16H), 0.87 (t,  $J$  = 6.9 Hz, 3H), 0.23 (s, 9H) ppm; **<sup>13</sup>C NMR (100 MHz, Chloroform-*d*)**:  $\delta$  196.98, 163.67, 152.78, 130.64, 130.18, 129.32, 113.75, 110.83, 58.69, 55.61, 43.94, 35.51, 32.06, 29.72, 29.66, 29.54, 29.48, 29.25, 26.24, 22.85, 14.31, -0.74 ppm; **HRMS (ESI, m/z)**: calculated for  $[M+H]^+$ : 485.3563, found: 485.3580.

#### 1-(4-methoxyphenyl)-3-methyl-3-(1H-1,2,4-triazol-1-yl)butan-1-one (3af)

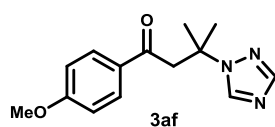

Following the General Procedure E, **3af** was obtained in 44% yield as a colorless oil; **<sup>1</sup>H NMR (400 MHz, Chloroform-*d*)**:  $\delta$  8.17 (s, 1H), 7.89 (s, 1H), 7.80 (d,  $J$  = 8.9 Hz, 2H), 6.86 (d,  $J$  = 9.0 Hz, 2H), 3.84 (s, 3H), 3.51 (s, 2H), 1.80 (s, 6H) ppm; **<sup>13</sup>C NMR (100 MHz, Chloroform-*d*)**:  $\delta$  195.20, 163.77, 151.59, 140.94, 130.36, 130.23,

113.79, 59.56, 55.57, 47.80, 27.70 ppm; **HRMS (ESI, m/z)**: calculated for [M+H]<sup>+</sup>: 260.1399, found: 260.1392.

### 1-(4-methoxyphenyl)-3-methyl-3-(2H-1,2,3-triazol-2-yl)butan-1-one (**3ag**)

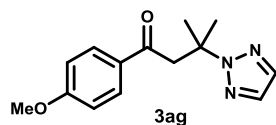

Following the General Procedure E, **3ag** was obtained in 21% yield as a colorless oil; **<sup>1</sup>H NMR (400 MHz, Chloroform-*d*)**: δ 7.84 (d, *J* = 8.9 Hz, 2H), 7.55 (s, 2H), 6.87 (d, *J* = 8.9 Hz, 2H), 3.85 (s, 3H), 3.62 (s, 2H), 1.85 (s, 6H) ppm; **<sup>13</sup>C NMR (100 MHz, Chloroform-*d*)**: δ 195.41, 163.59, 133.51, 130.64, 130.47, 113.71, 64.09, 55.57, 48.31, 27.84 ppm; **HRMS (ESI, m/z)**: calculated for [M+H]<sup>+</sup>: 260.1399, found: 260.1396.

### 1-(4-methoxyphenyl)-3-methyl-3-(1H-1,2,3-triazol-1-yl)butan-1-one (**3ag'**)

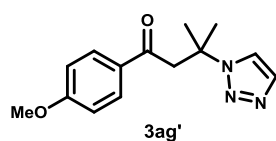

Following the General Procedure E, **3ag'** was obtained in 30% yield as a colorless oil; **<sup>1</sup>H NMR (400 MHz, Chloroform-*d*)**: δ 7.80 (d, *J* = 8.9 Hz, 2H), 7.66 (d, *J* = 1.0 Hz, 1H), 7.61 (d, *J* = 1.0 Hz, 1H), 6.86 (d, *J* = 8.9 Hz, 2H), 3.84 (s, 3H), 3.65 (s, 2H), 1.86 (s, 6H) ppm; **<sup>13</sup>C NMR (100 MHz, Chloroform-*d*)**: δ 195.17, 163.80, 132.99, 130.39, 130.23, 121.52, 113.83, 60.32, 55.59, 48.64, 28.38 ppm; **HRMS (ESI, m/z)**: calculated for [M+H]<sup>+</sup>: 260.1399, found: 260.1396.

### 3-(2H-benzo[d][1,2,3]triazol-2-yl)-1-(4-methoxyphenyl)-3-methylbutan-1-one (**3ah**)

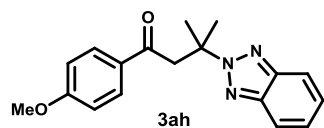

Following the General Procedure E, **3ah** was obtained in 24% yield as a white solid, mp 84-89 °C; **<sup>1</sup>H NMR (400 MHz, Chloroform-*d*)**: δ 7.83 (d, *J* = 9.2 Hz, 4H), 7.33 (dd, *J* = 6.6, 3.1 Hz, 2H), 6.82 (d, *J* = 8.9 Hz, 2H), 3.82 (s, 3H), 3.81 (s, 2H), 2.00 (s, 6H) ppm; **<sup>13</sup>C NMR (100 MHz, Chloroform-*d*)**: δ 195.11, 163.58, 143.92, 130.51, 130.38, 126.04, 118.22, 113.65, 66.00, 55.55, 48.79, 28.19 ppm; **HRMS (ESI, m/z)**: calculated for [M+H]<sup>+</sup>: 310.1556, found: 310.1558.

### 3-(1H-benzo[d][1,2,3]triazol-1-yl)-1-(4-methoxyphenyl)-3-methylbutan-1-one (**3ah'**)

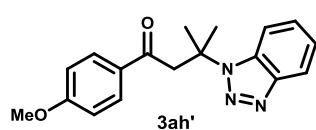

Following the General Procedure E, **3ah'** was obtained in 40% yield as a white solid, mp 87-91 °C; **<sup>1</sup>H NMR (400 MHz, Chloroform-*d*)**: δ 8.03 (d, *J* = 8.3 Hz, 1H), 7.82 (d, *J* = 8.9 Hz, 2H), 7.77 (d, *J* = 8.5 Hz, 1H), 7.45 – 7.39 (m, 1H), 7.34 – 7.29 (m, 1H), 6.84 (d, *J* = 8.9 Hz, 2H), 3.83 (s, 3H), 3.81 (s, 2H), 2.07 (s, 6H) ppm; **<sup>13</sup>C NMR (100 MHz, Chloroform-*d*)**: δ 195.27, 163.70, 146.95, 132.21, 130.43, 126.93, 123.51, 120.41, 113.79, 112.17, 62.43, 55.58, 48.46, 28.18 ppm; **HRMS (ESI, m/z)**: calculated for [M+H]<sup>+</sup>: 310.1556, found: 310.1554.

### 1,1,1-trifluoro-N-(4-(4-methoxyphenyl)-2-methyl-4-oxobutan-2-yl)methanesulfonamide (**3ai**)

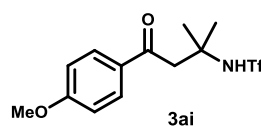

Following the General Procedure E, **3ai** was obtained in 37% yield as a colorless oil; **<sup>1</sup>H NMR (400 MHz, Chloroform-*d*)**: δ 7.92 (d, *J* = 8.9 Hz, 2H), 7.12 (s, 1H), 6.96 (d, *J* = 8.9 Hz, 2H), 3.89 (s, 3H), 3.19 (s, 2H), 1.55 (s, 6H) ppm; **<sup>19</sup>F NMR (376 MHz, Chloroform-*d*)**: δ -78.00 ppm; **<sup>13</sup>C NMR (100 MHz, Chloroform-*d*)**: δ 198.13, 164.39, 130.61, 129.66,



119.28 (q,  $J = 320.8$  Hz), 114.04, 58.26, 55.60, 48.38, 28.09 ppm; **HRMS (ESI, m/z)**: calculated for  $[M+H]^+$ : 340.0825, found: 340.0828.

**(2-(4-(1H-pyrazol-1-yl)phenyl)cyclopropyl)methyl acetate (5aka)**

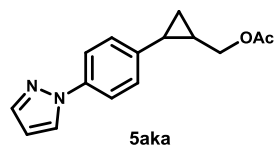

**$^1\text{H NMR}$  (400 MHz, Chloroform-*d*)**:  $\delta$  7.86 (dd,  $J = 2.4, 0.5$  Hz, 1H), 7.69 (d,  $J = 1.5$  Hz, 1H), 7.57 (d,  $J = 8.6$  Hz, 2H), 7.13 (d,  $J = 8.5$  Hz, 2H), 6.45 – 6.40 (m, 1H), 4.11 – 3.95 (m, 2H), 2.07 (s, 3H), 1.91 (dt,  $J = 8.7, 5.3$  Hz, 1H), 1.53 – 1.43 (m, 1H), 1.05 – 0.95 (m, 2H) ppm;  **$^{13}\text{C NMR}$  (100 MHz, Chloroform-*d*)**:  $\delta$  171.30, 140.96, 140.47, 138.35, 126.99, 126.74, 119.36, 107.50, 67.92, 21.60, 21.48, 21.13, 14.05 ppm; **HRMS (ESI, m/z)**: calculated for  $[M+H]^+$ : 257.1290, found: 257.1287.

**ethyl 2-(4-(1H-pyrazol-1-yl)phenyl)cyclopropane-1-carboxylate (5bba)**

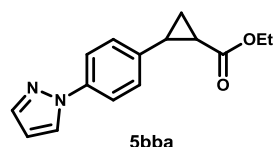

**$^1\text{H NMR}$  (400 MHz, Chloroform-*d*)**:  $\delta$  7.89 (d,  $J = 2.4$  Hz, 1H), 7.71 (d,  $J = 1.6$  Hz, 1H), 7.60 (d,  $J = 8.6$  Hz, 2H), 7.18 (d,  $J = 8.6$  Hz, 2H), 6.47 – 6.44 (m, 1H), 4.31 – 4.03 (m, 2H), 2.55 (ddd,  $J = 9.4, 6.5, 4.2$  Hz, 1H), 1.92 (ddd,  $J = 8.5, 5.3, 4.2$  Hz, 1H), 1.65 – 1.61 (m, 1H), 1.37 – 1.31 (m, 1H), 1.29 (t,  $J = 7.1$  Hz, 3H) ppm;  **$^{13}\text{C NMR}$  (100 MHz, Chloroform-*d*)**:  $\delta$  173.33, 141.09, 138.53, 127.29, 126.75, 119.35, 107.64, 60.90, 25.72, 24.28, 17.14, 14.35 ppm; **HRMS (ESI, m/z)**: calculated for  $[M+H]^+$ : 257.1290, found: 257.1284.

**1-(1a,6b-dihydro-1H-cyclopropa[b]benzofuran-5-yl)-1H-pyrazole (6baa)**

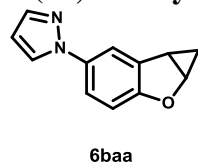

**$^1\text{H NMR}$  (400 MHz, Chloroform-*d*)**:  $\delta$  7.82 – 7.76 (m, 1H), 7.68 (d,  $J = 1.5$  Hz, 1H), 7.66 (d,  $J = 2.4$  Hz, 1H), 7.34 (dd,  $J = 8.6, 2.4$  Hz, 1H), 6.85 (d,  $J = 8.6$  Hz, 1H), 6.54 – 6.27 (m, 1H), 4.87 (td,  $J = 5.4, 1.9$  Hz, 1H), 2.67 (ddd,  $J = 9.1, 5.2, 4.1$  Hz, 1H), 1.13 – 0.88 (m, 1H), 0.50 – 0.24 (m, 1H) ppm;  **$^{13}\text{C NMR}$  (100 MHz, Chloroform-*d*)**:  $\delta$  158.10, 140.59, 132.59, 127.12, 118.87, 116.49, 110.48, 107.13, 62.48, 19.92, 10.33 ppm; **HRMS (ESI, m/z)**: calculated for  $[M+H]^+$ : 199.0871, found: 199.0867.

# $^1\text{H}$ , and $^{13}\text{C}$ NMR Spectra of Structurally Novel Compounds

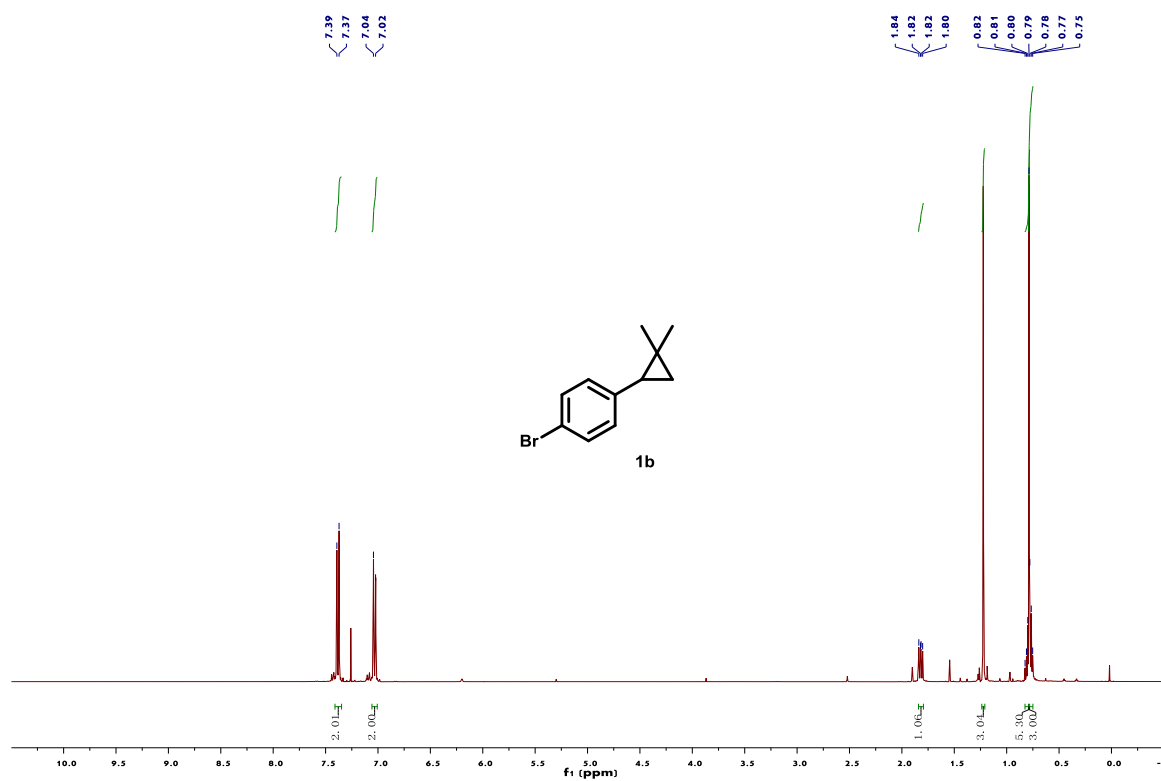

Supplementary Figure 32.  $^1\text{H}$  NMR (400 MHz,  $\text{CDCl}_3$ ) spectrum for **1b**

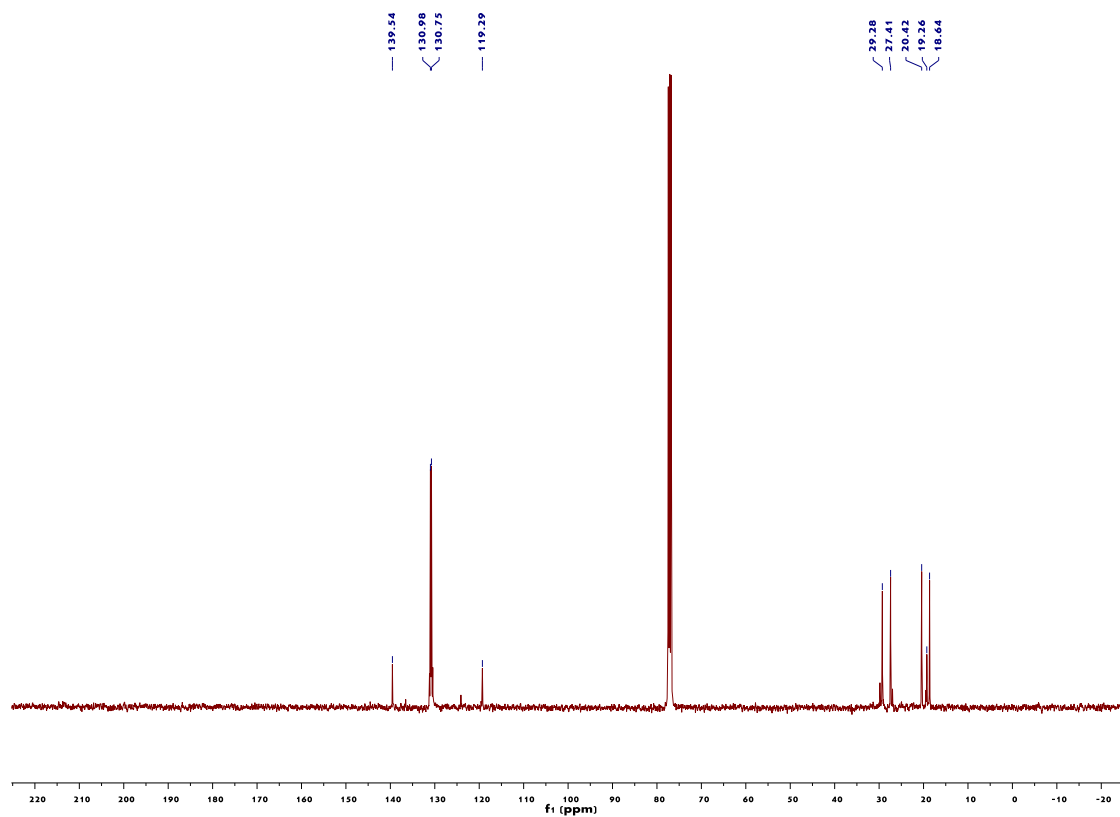

Supplementary Figure 33.  $^{13}\text{C}$  NMR (100 MHz,  $\text{CDCl}_3$ ) spectrum for **1b**

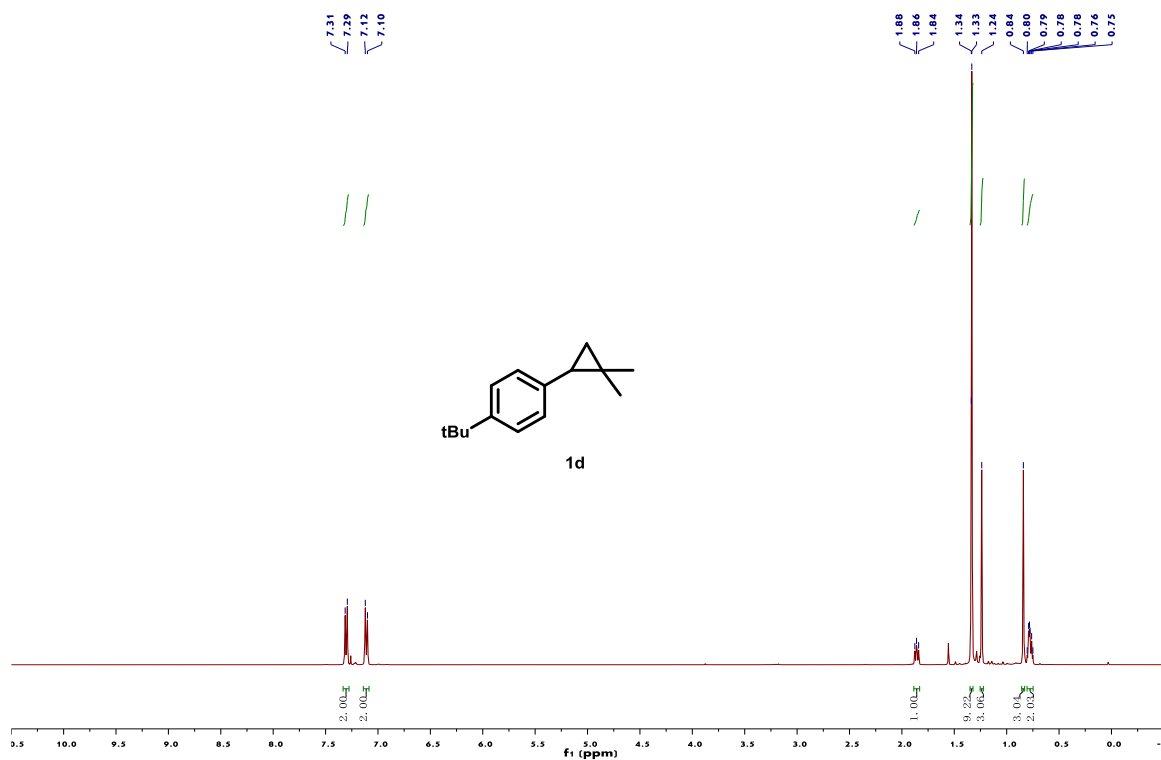

Supplementary Figure 34.  $^1\text{H}$  NMR (400 MHz,  $\text{CDCl}_3$ ) spectrum for 1d

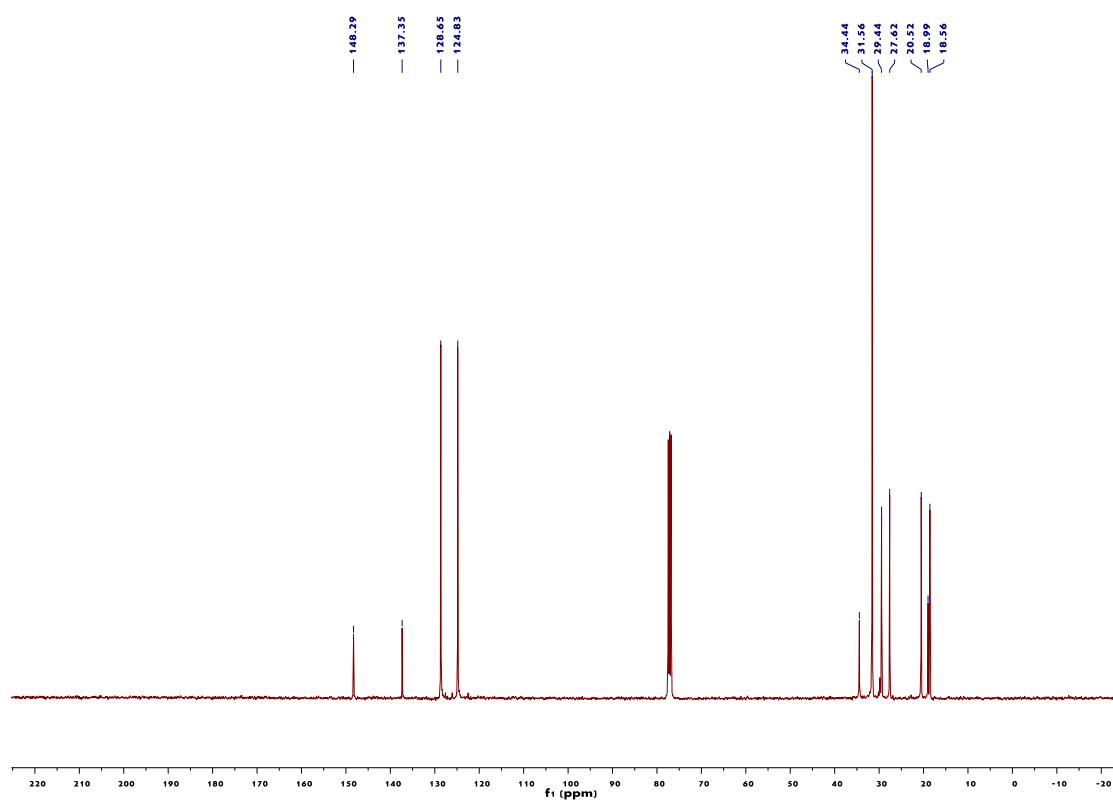

Supplementary Figure 35.  $^{13}\text{C}$  NMR (100 MHz,  $\text{CDCl}_3$ ) spectrum for 1d

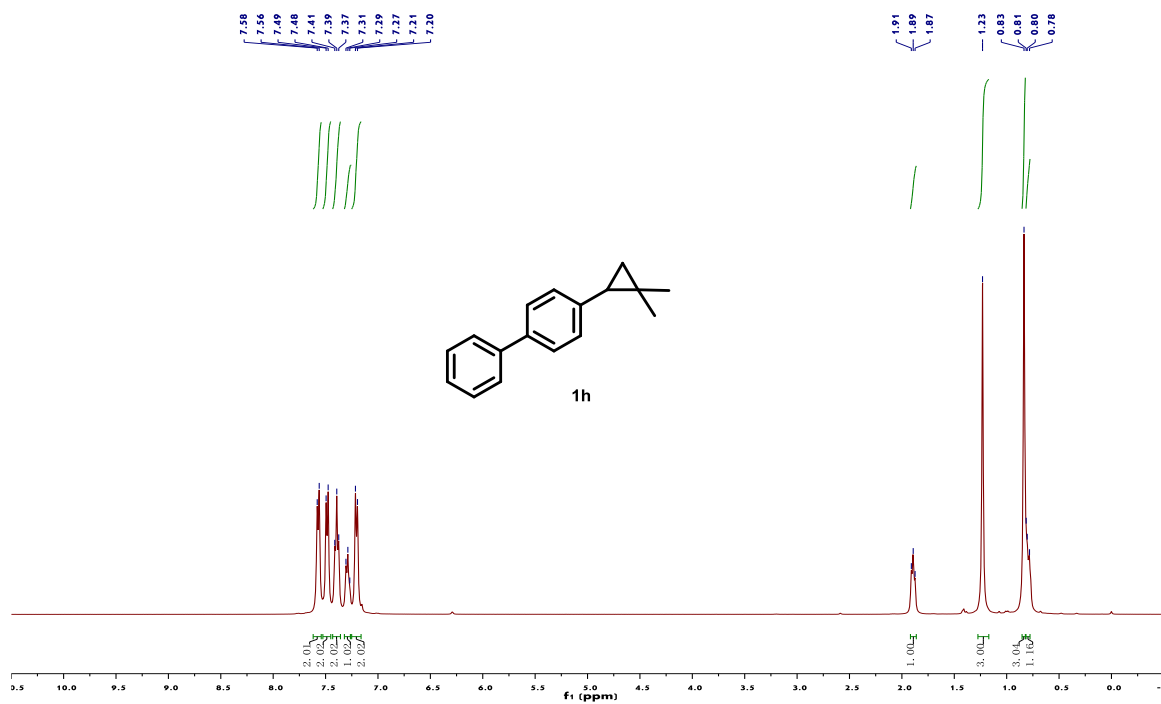

Supplementary Figure 36. <sup>1</sup>H NMR (400 MHz, CDCl<sub>3</sub>) spectrum for 1h

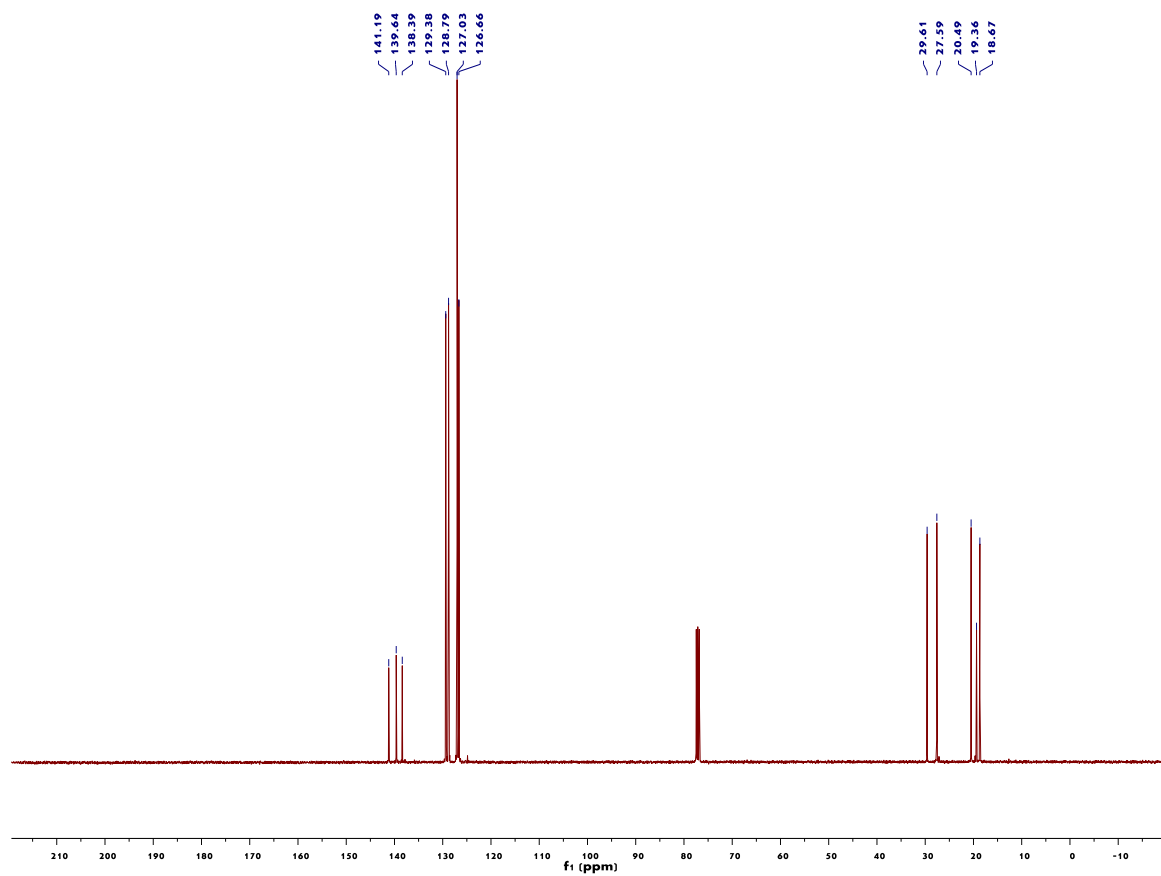

Supplementary Figure 37. <sup>13</sup>C NMR (100 MHz, CDCl<sub>3</sub>) spectrum for 1h

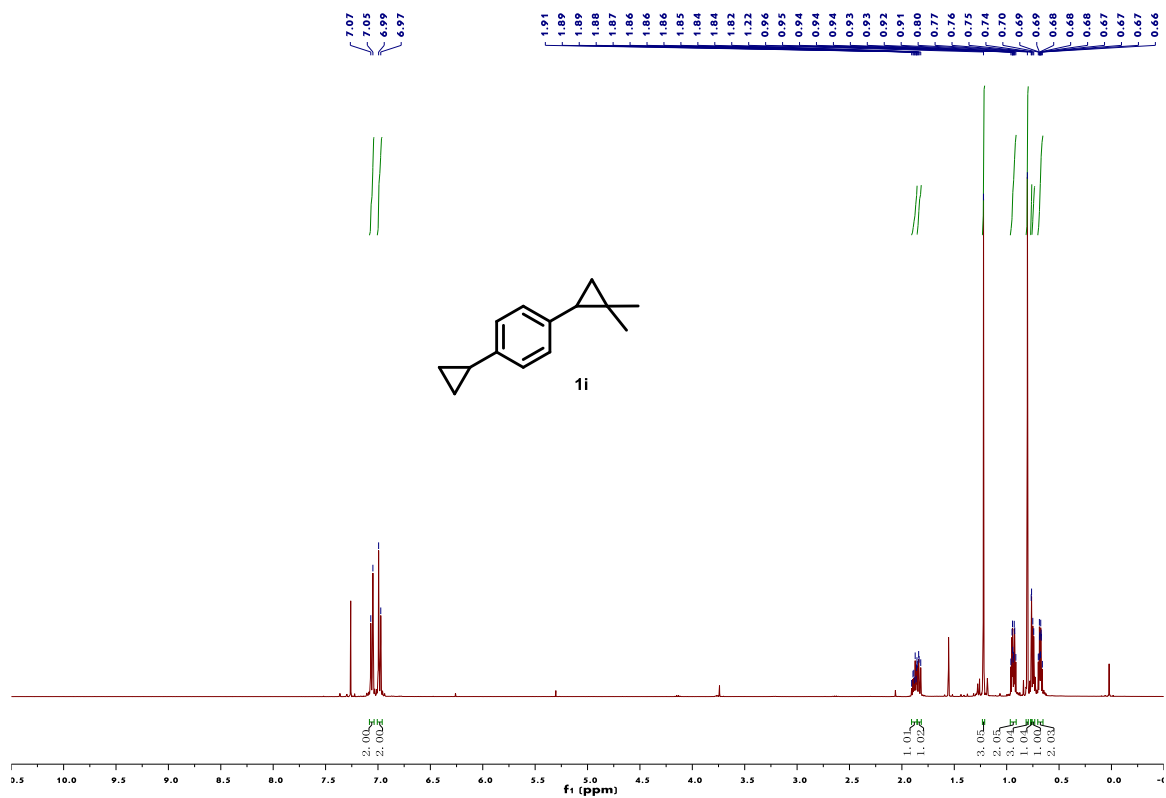

Supplementary Figure 38. <sup>1</sup>H NMR (400 MHz, CDCl<sub>3</sub>) spectrum for **1i**

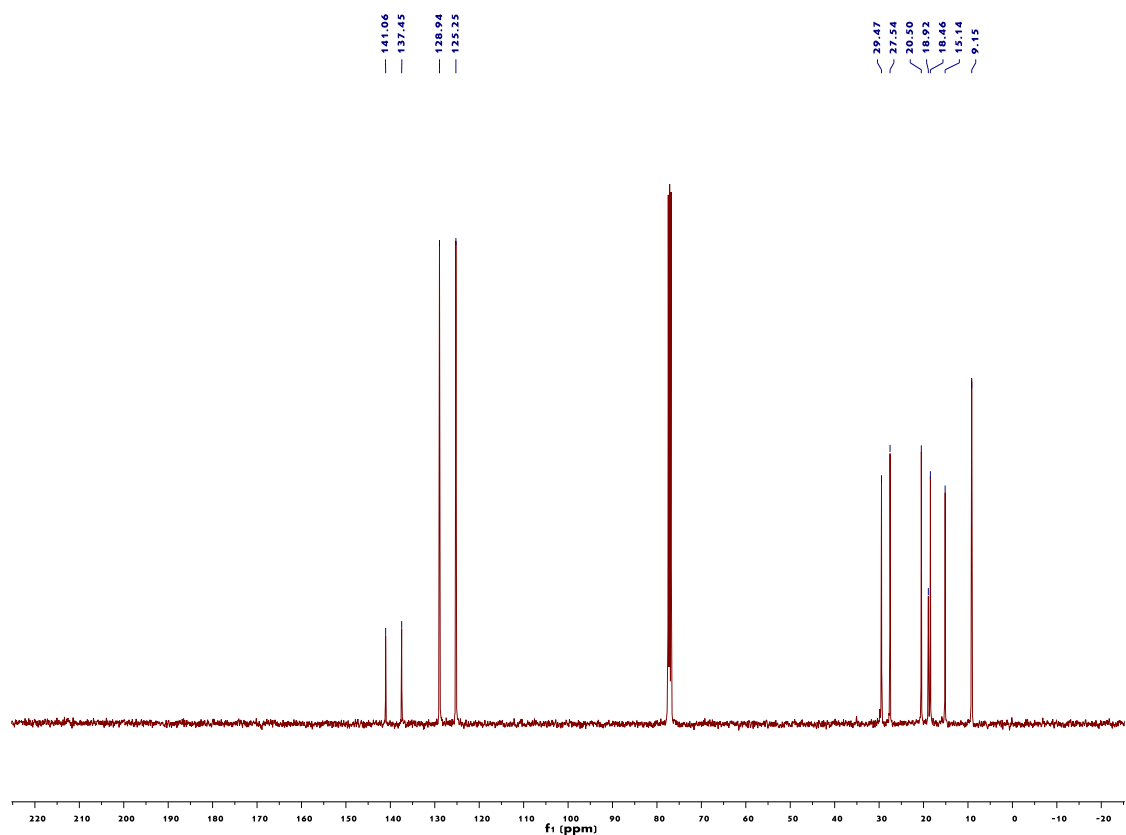

Supplementary Figure 39. <sup>13</sup>C NMR (100 MHz, CDCl<sub>3</sub>) spectrum for **1i**

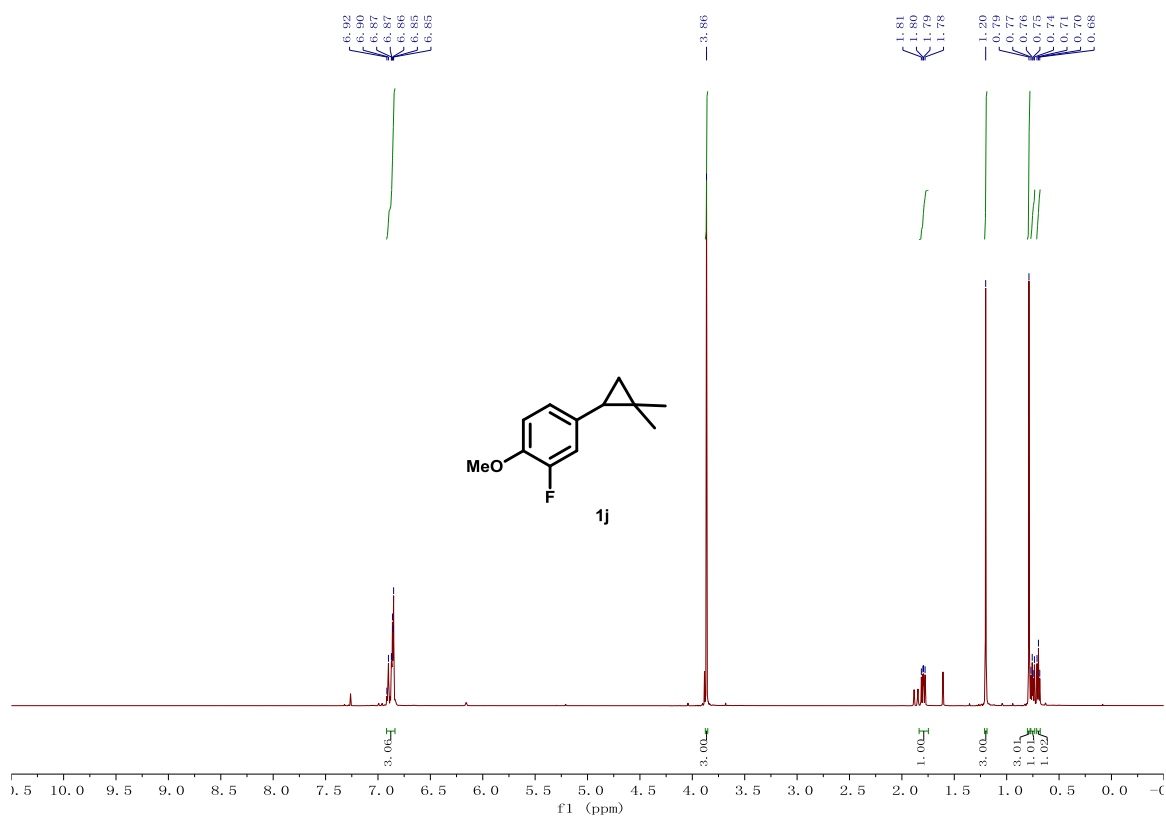

Supplementary Figure 40. <sup>1</sup>H NMR (400 MHz, CDCl<sub>3</sub>) spectrum for **1j**

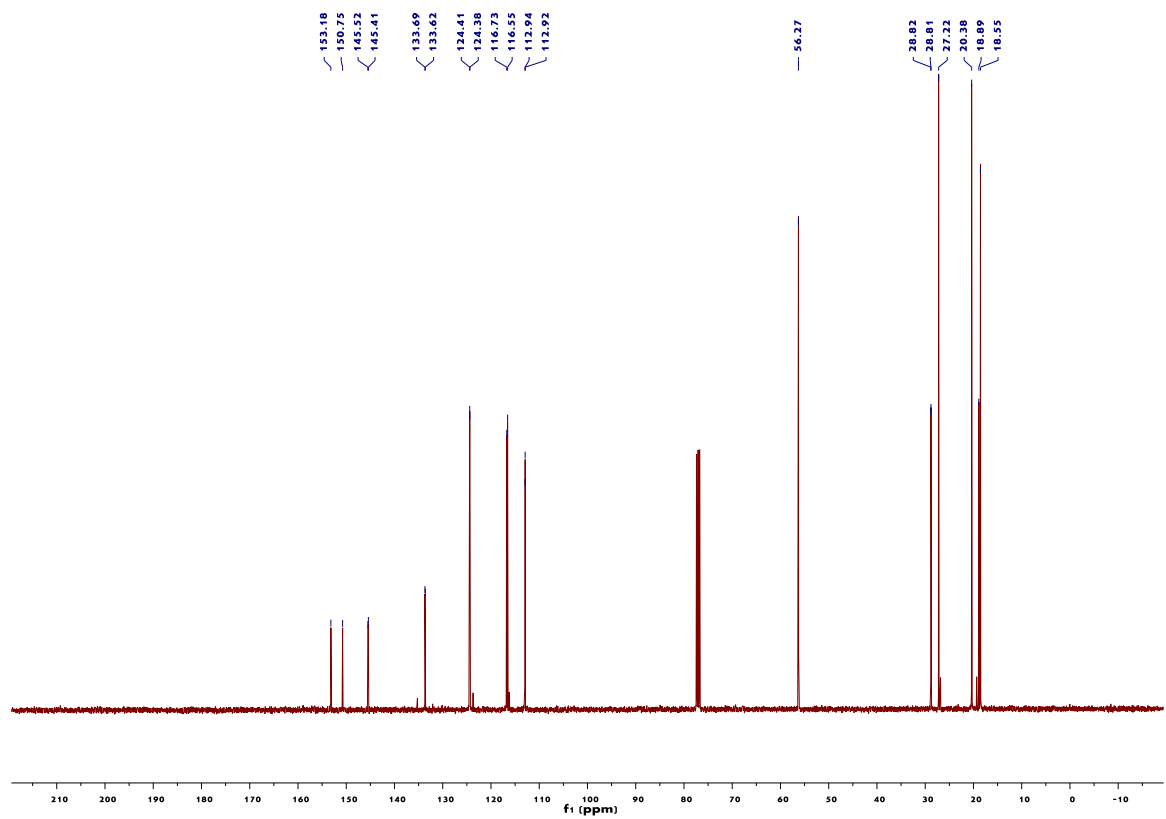

Supplementary Figure 41. <sup>13</sup>C NMR (100 MHz, CDCl<sub>3</sub>) spectrum for **1j**

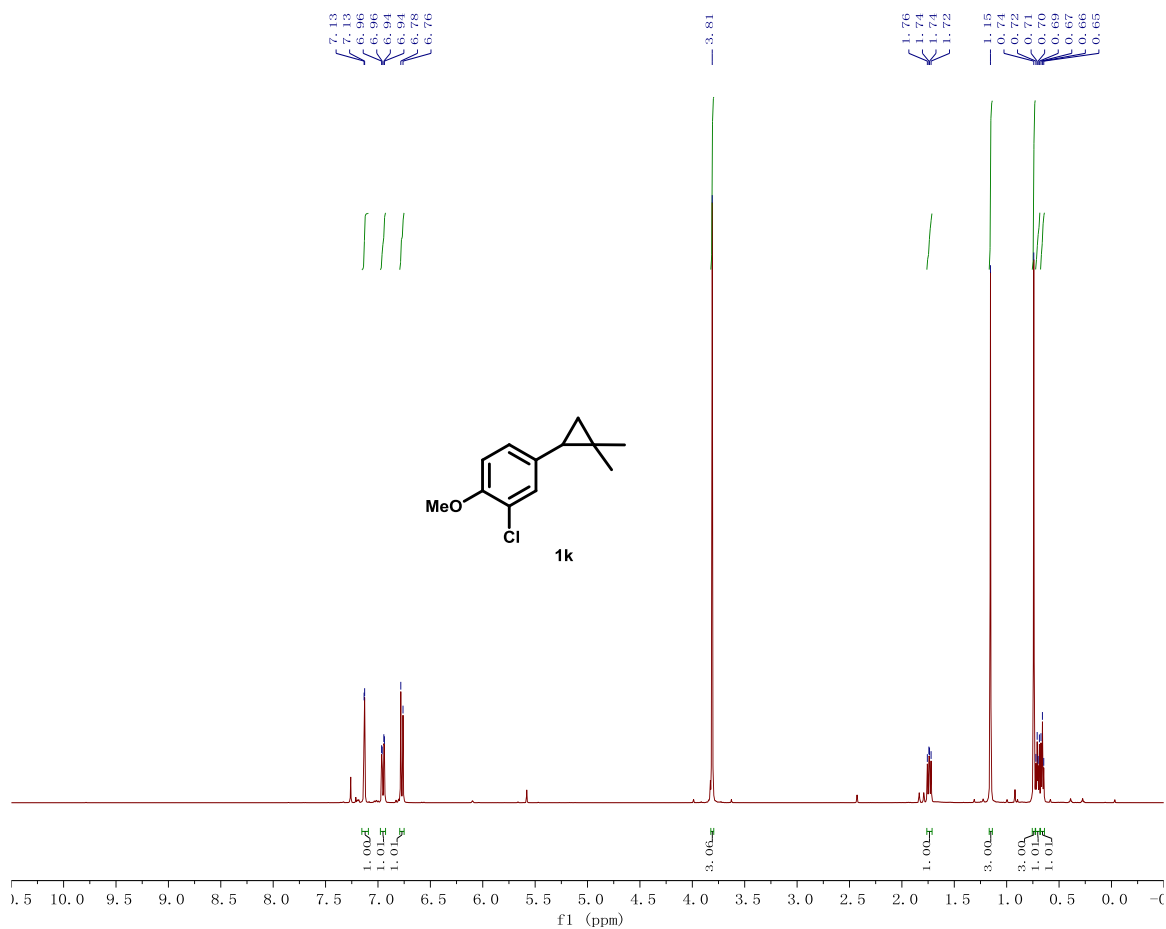

Supplementary Figure 42. <sup>1</sup>H NMR (400 MHz, CDCl<sub>3</sub>) spectrum for **1k**

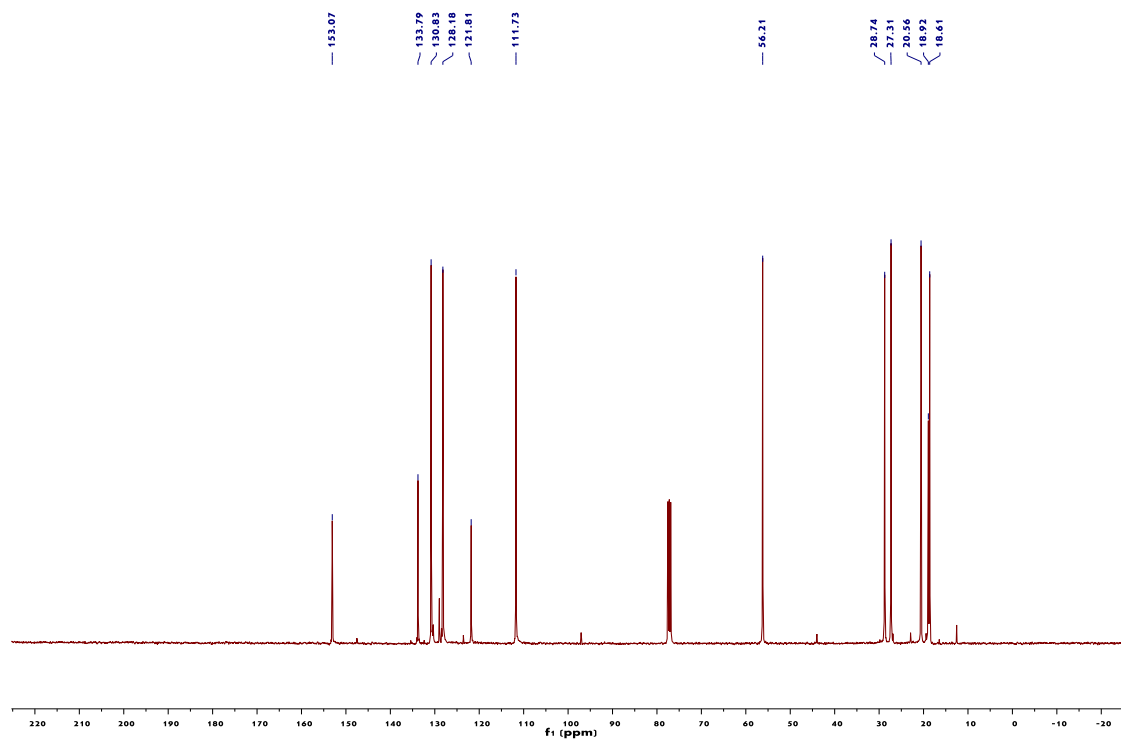

Supplementary Figure 43. <sup>13</sup>C NMR (100 MHz, CDCl<sub>3</sub>) spectrum for **1k**

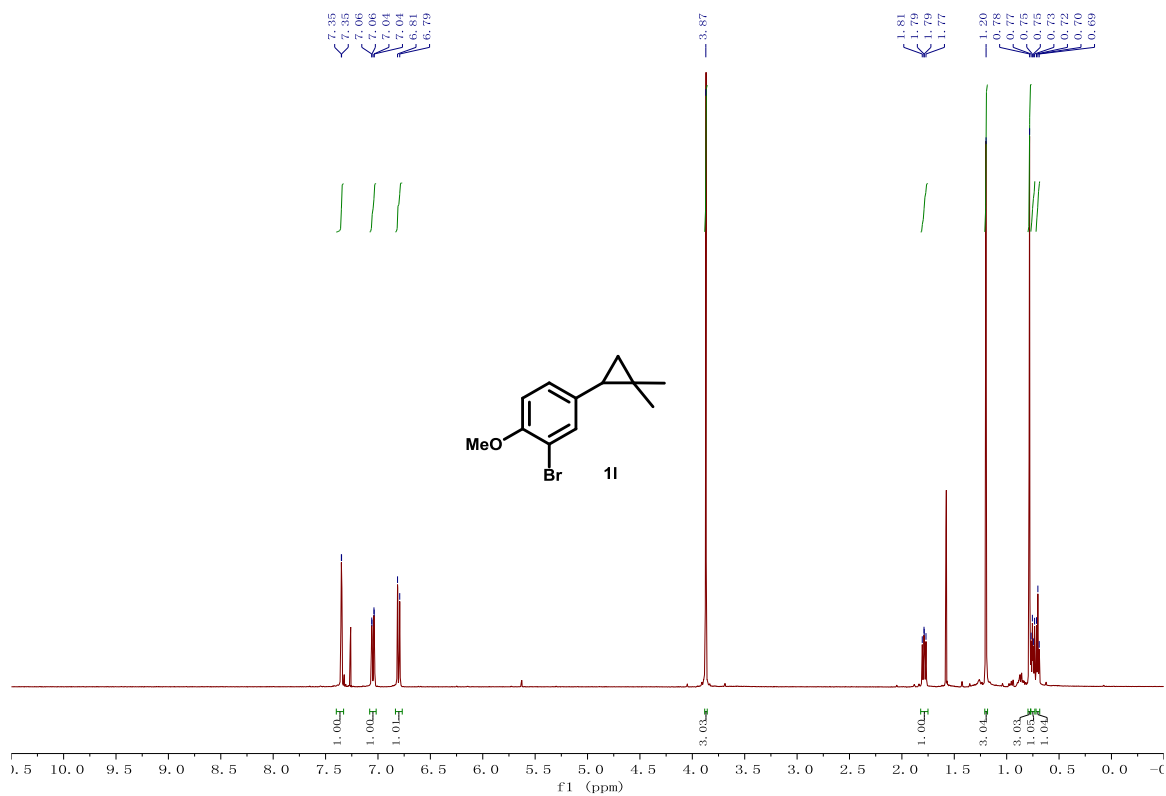

Supplementary Figure 44. <sup>1</sup>H NMR (400 MHz, CDCl<sub>3</sub>) spectrum for 11

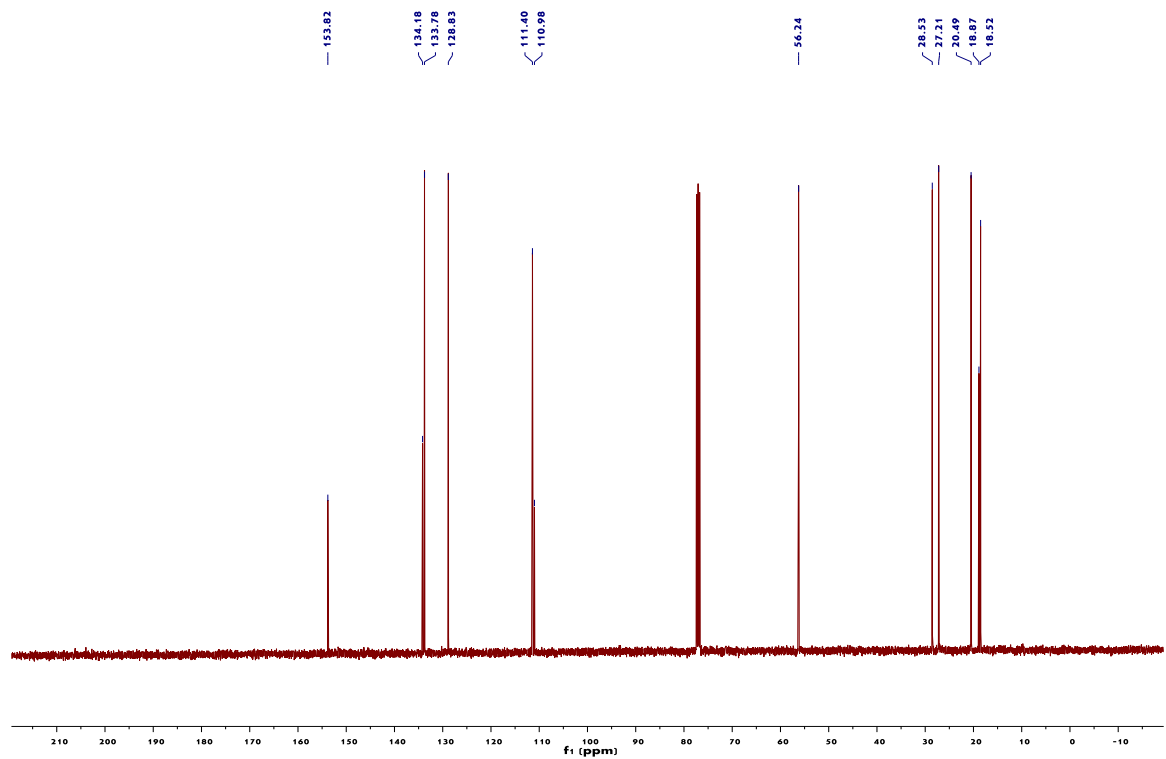

Supplementary Figure 45. <sup>13</sup>C NMR (100 MHz, CDCl<sub>3</sub>) spectrum for 11



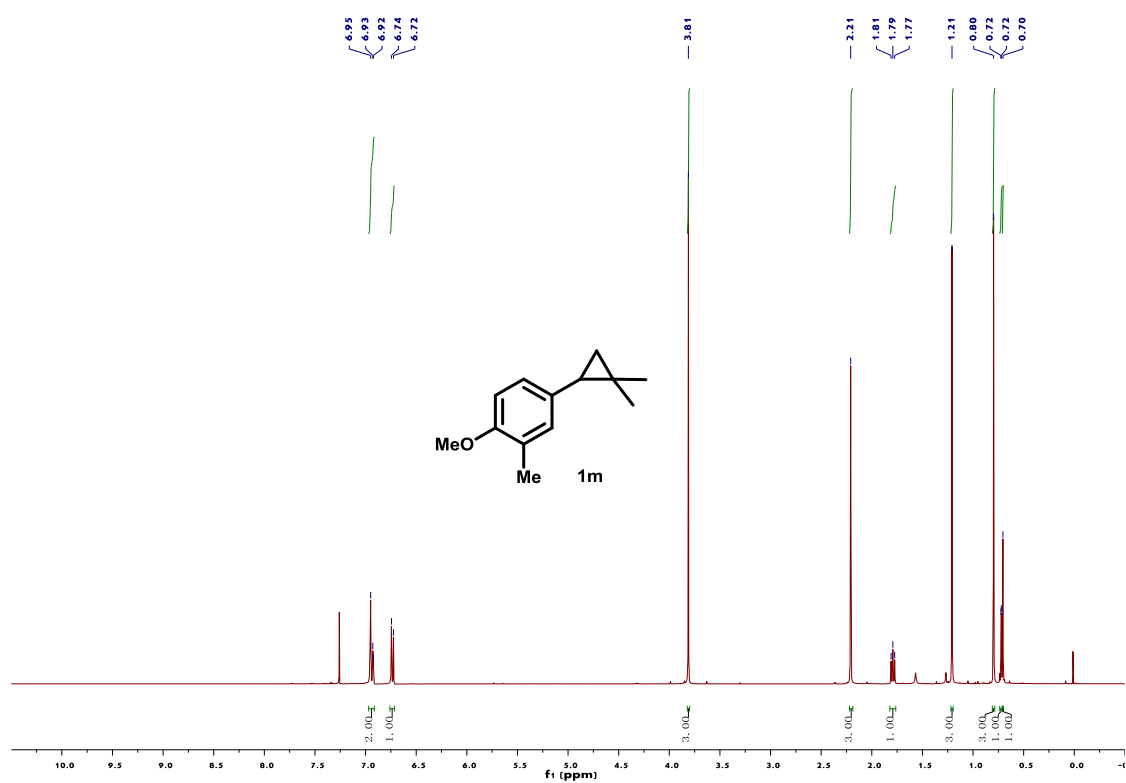

Supplementary Figure 46.  $^1\text{H}$  NMR (400 MHz,  $\text{CDCl}_3$ ) spectrum for 1m

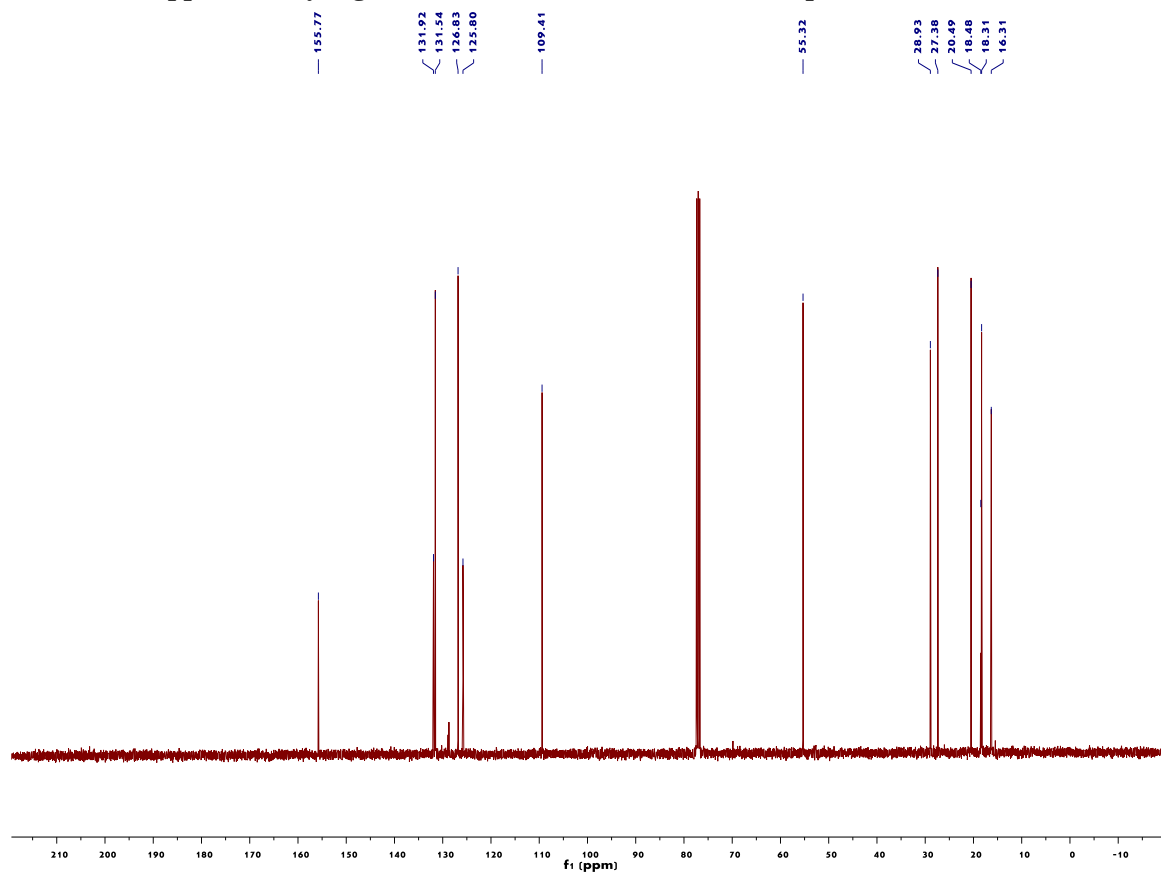

Supplementary Figure 47.  $^{13}\text{C}$  NMR (100 MHz,  $\text{CDCl}_3$ ) spectrum for 1m

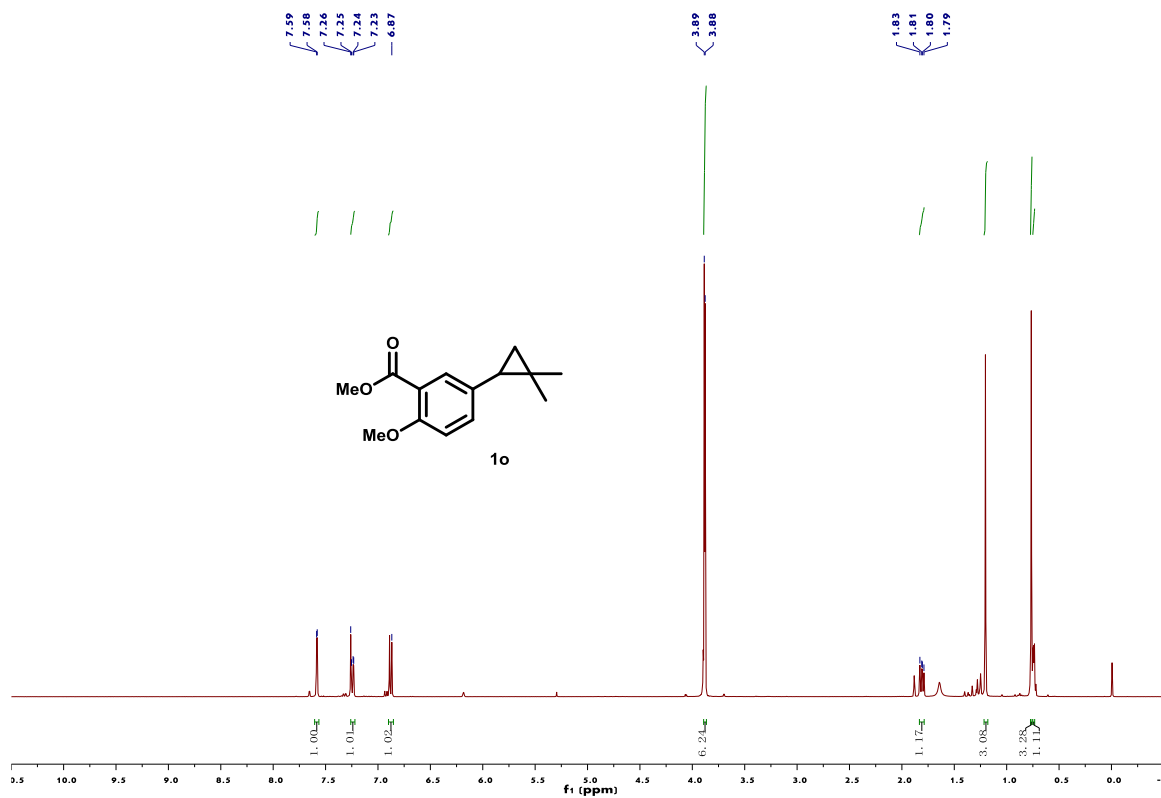

Supplementary Figure 48. <sup>1</sup>H NMR (400 MHz, CDCl<sub>3</sub>) spectrum for **1o**

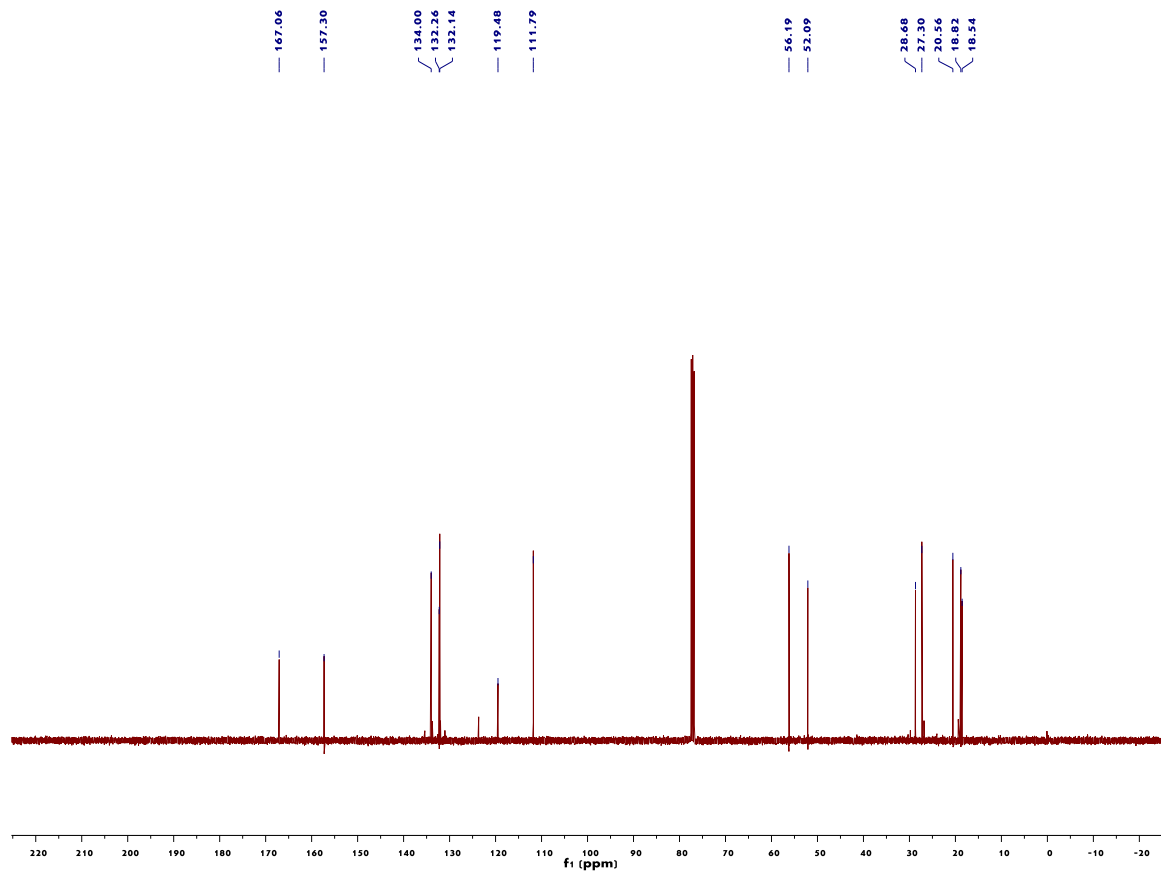

Supplementary Figure 49. <sup>13</sup>C NMR (100 MHz, CDCl<sub>3</sub>) spectrum for **1o**

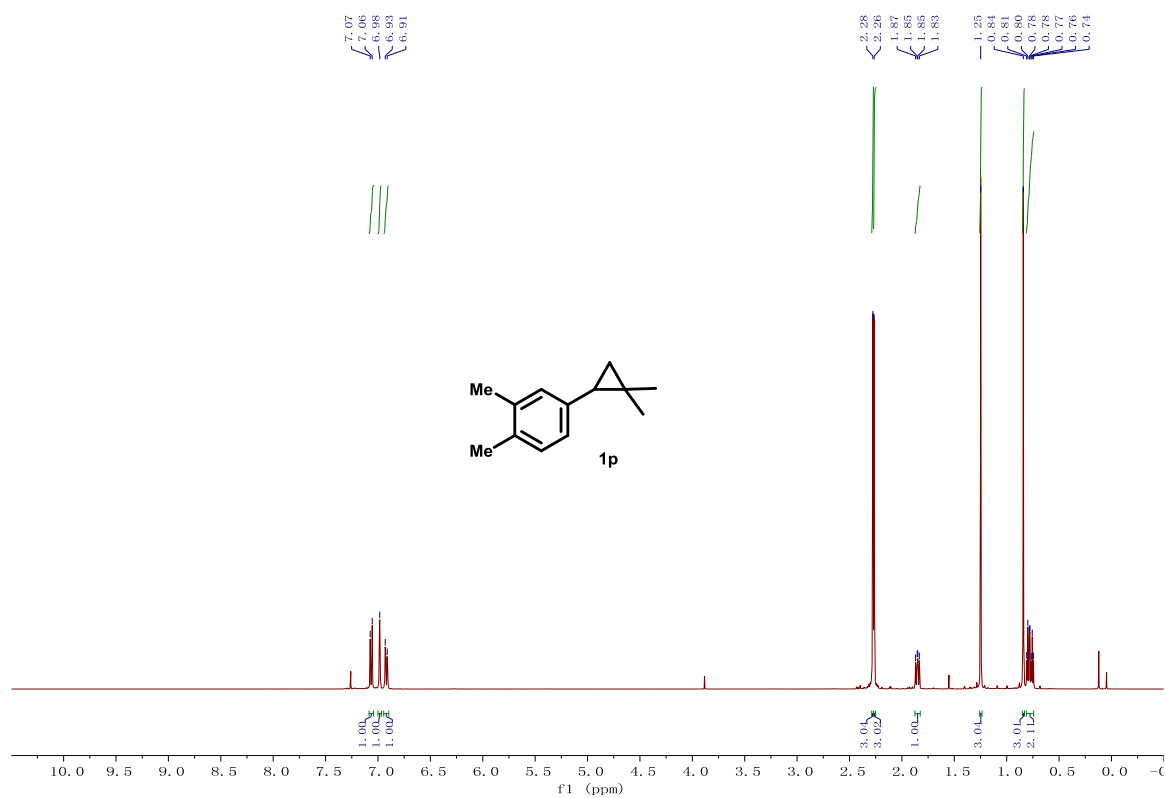

Supplementary Figure 50. <sup>1</sup>H NMR (400 MHz, CDCl<sub>3</sub>) spectrum for 1p

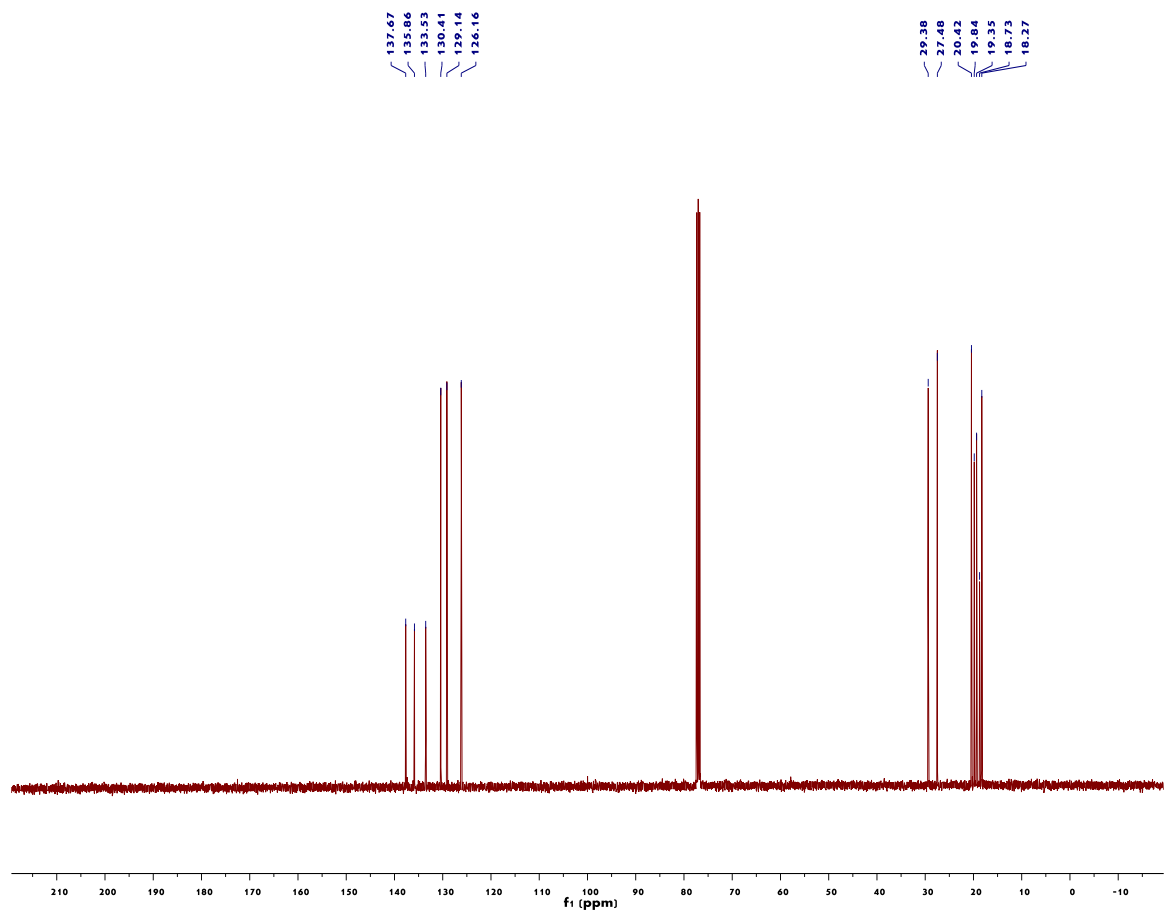

Supplementary Figure 51. <sup>13</sup>C NMR (100 MHz, CDCl<sub>3</sub>) spectrum for 1p

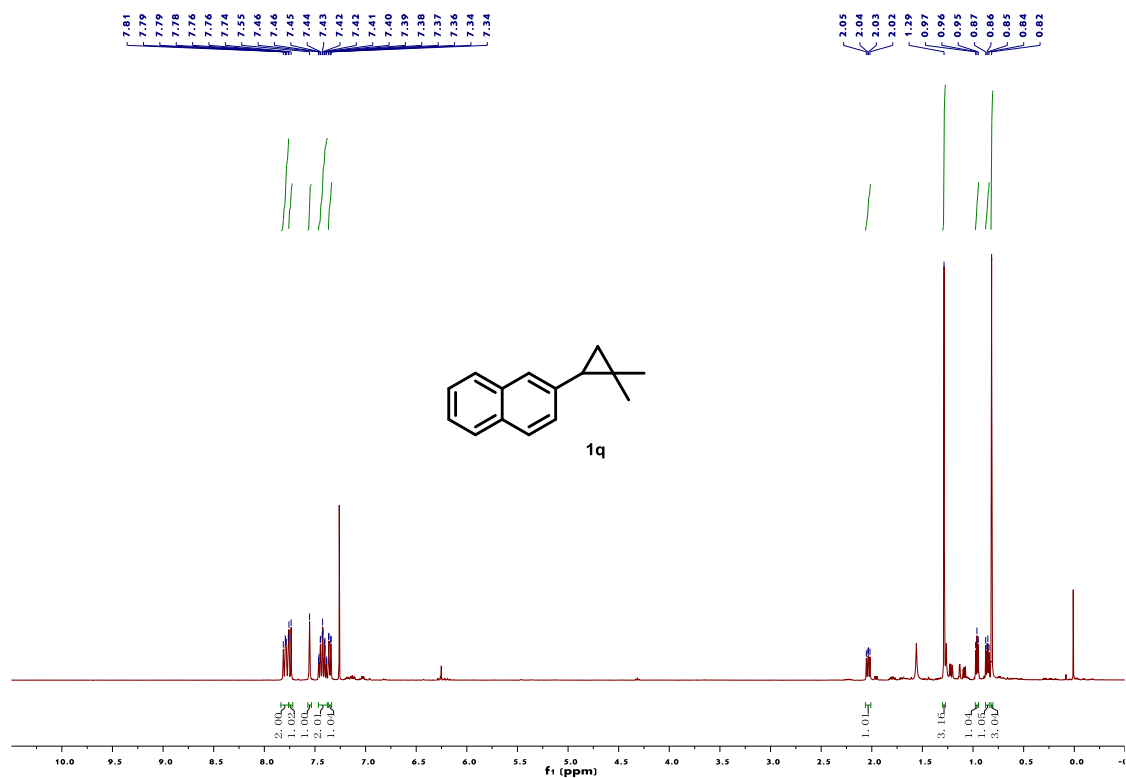

Supplementary Figure 52. <sup>1</sup>H NMR (400 MHz, CDCl<sub>3</sub>) spectrum for 1q

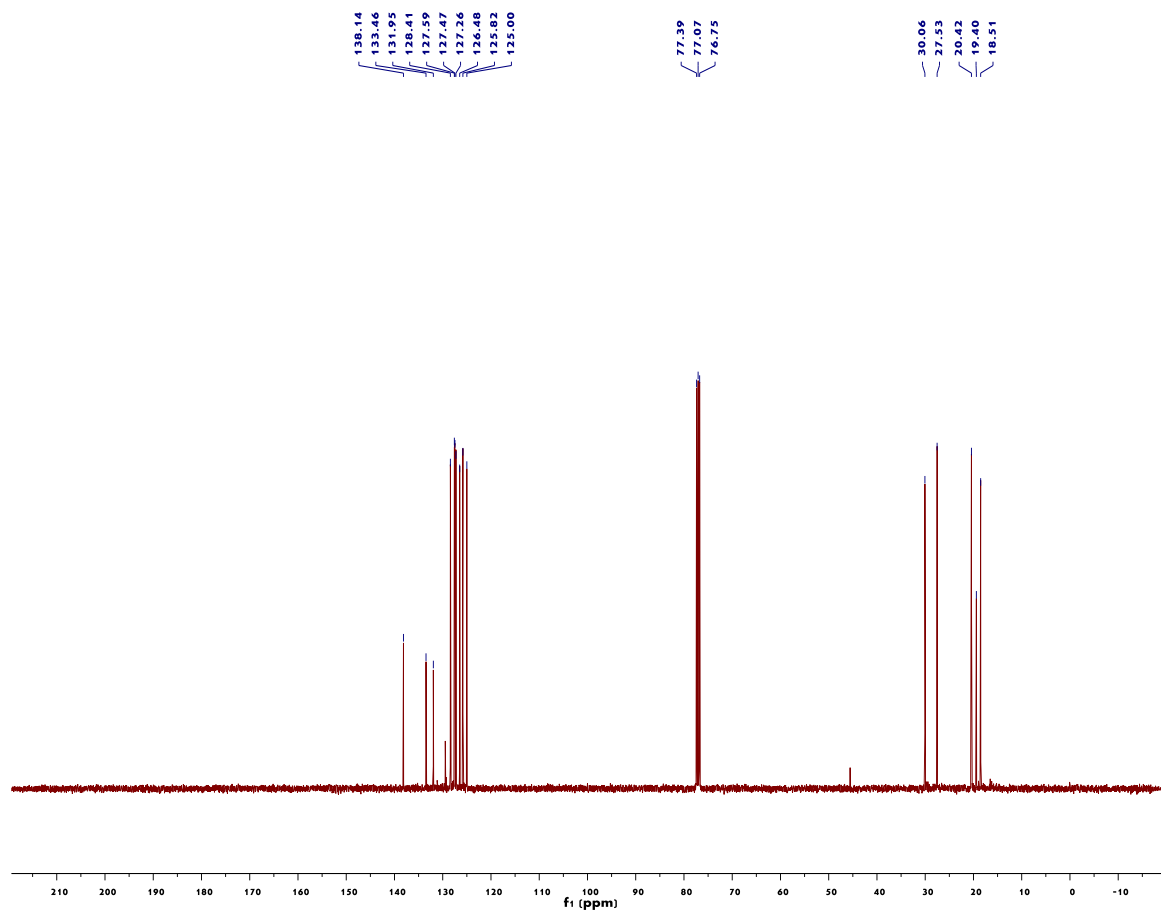

Supplementary Figure 53. <sup>13</sup>C NMR (100 MHz, CDCl<sub>3</sub>) spectrum for 1q

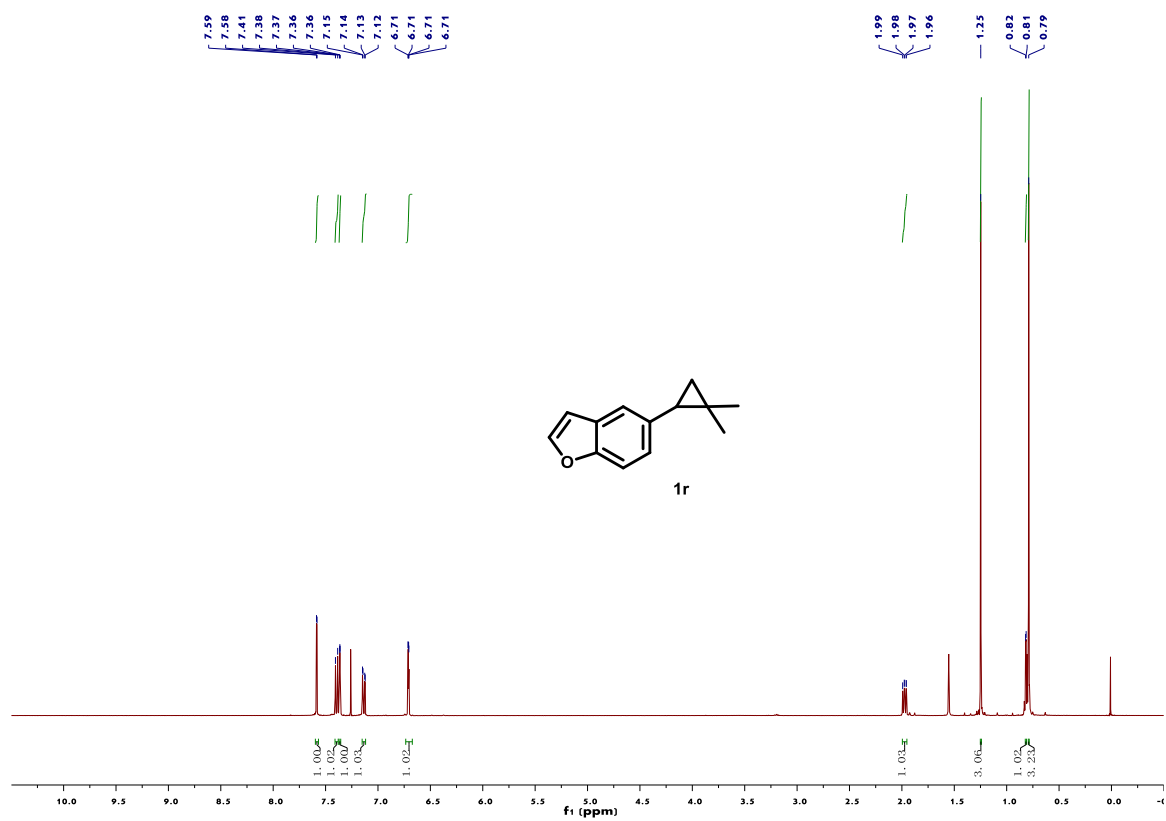

Supplementary Figure 54. <sup>1</sup>H NMR (400 MHz, CDCl<sub>3</sub>) spectrum for 1r

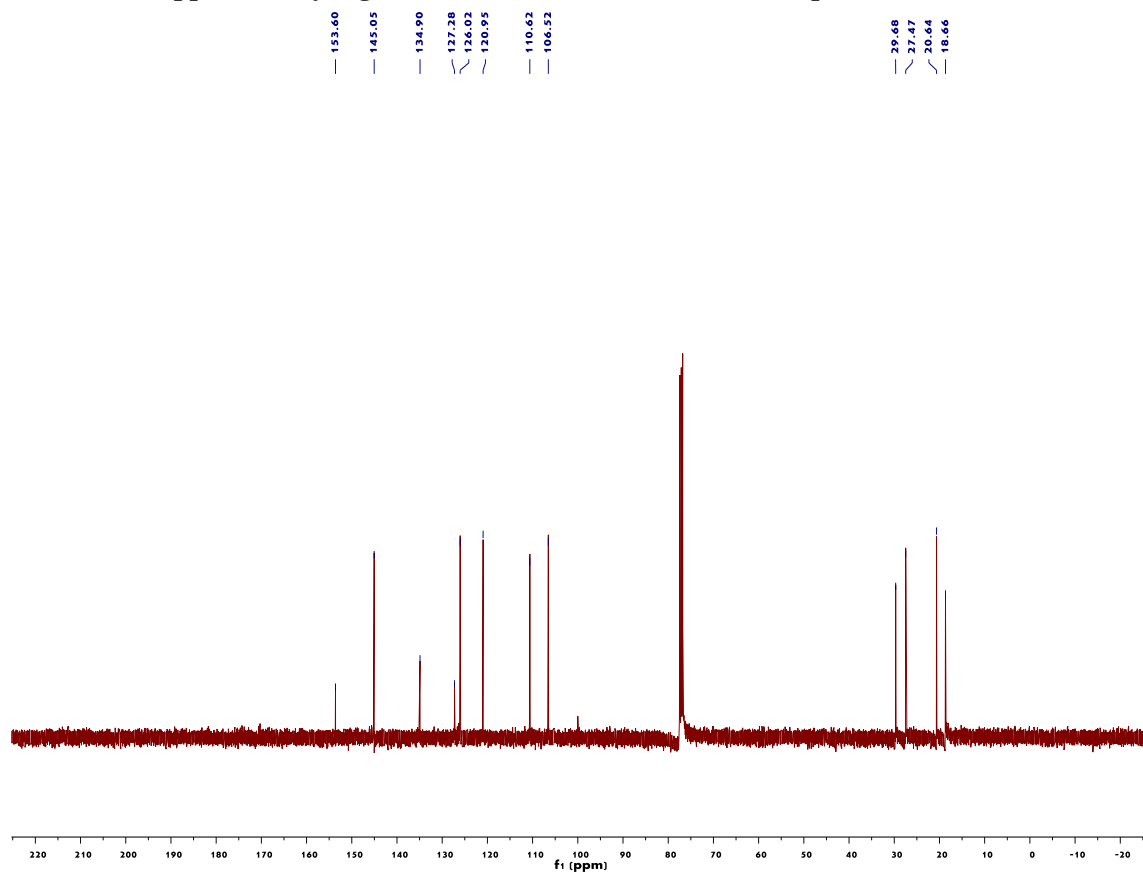

Supplementary Figure 55. <sup>13</sup>C NMR (100 MHz, CDCl<sub>3</sub>) spectrum for 1r

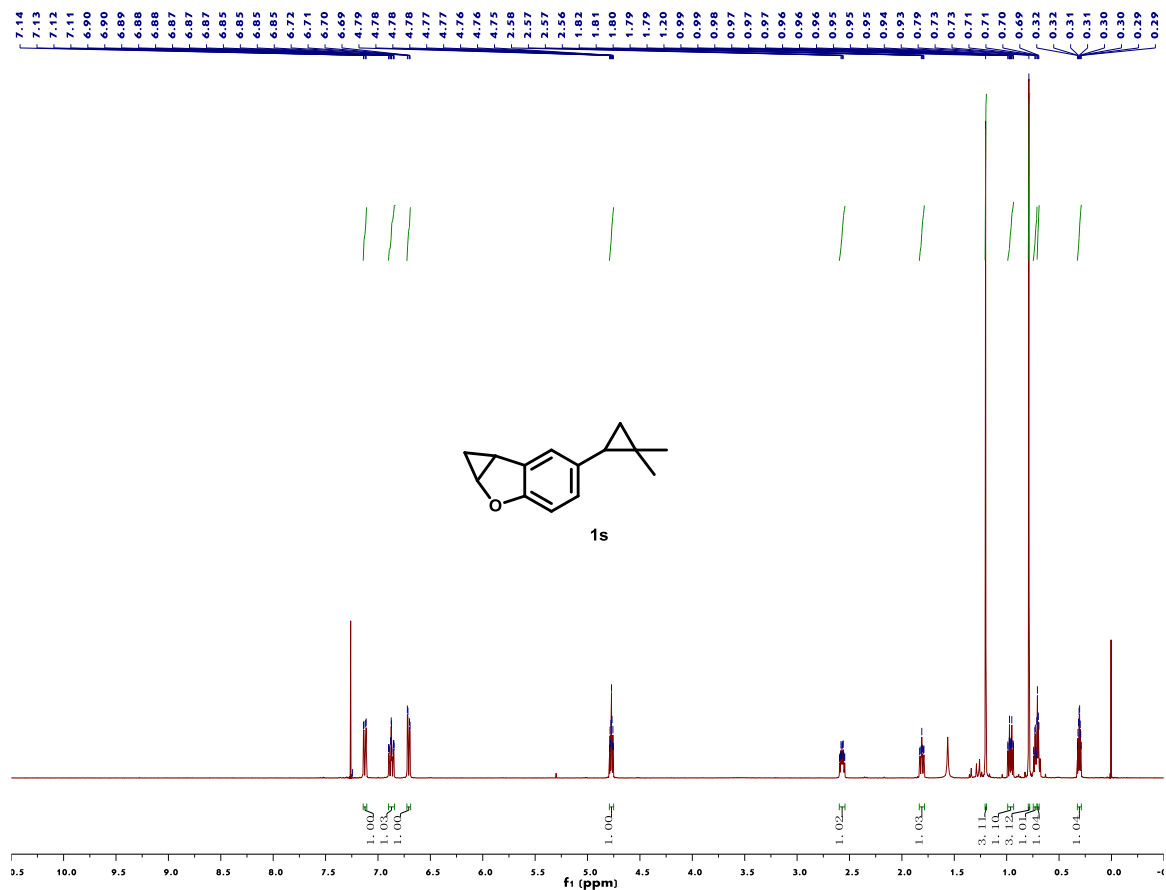

Supplementary Figure 56. <sup>1</sup>H NMR (400 MHz, CDCl<sub>3</sub>) spectrum for 1s

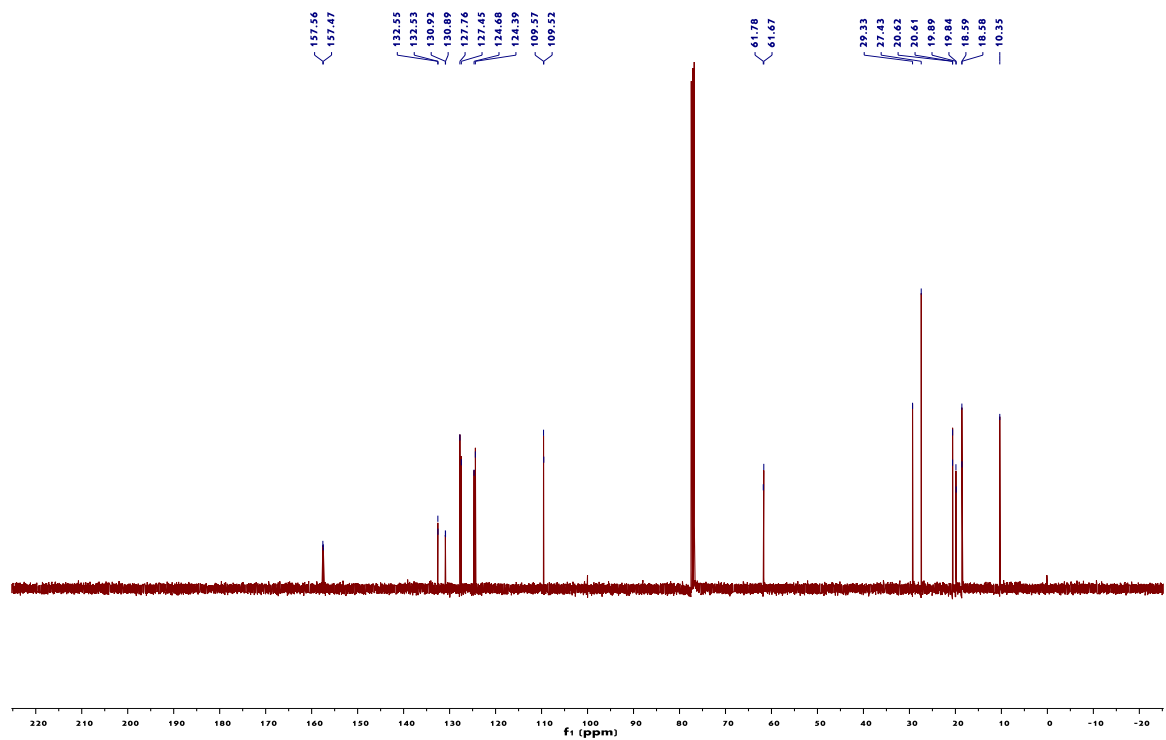

Supplementary Figure 57. <sup>13</sup>C NMR (100 MHz, CDCl<sub>3</sub>) spectrum for 1s

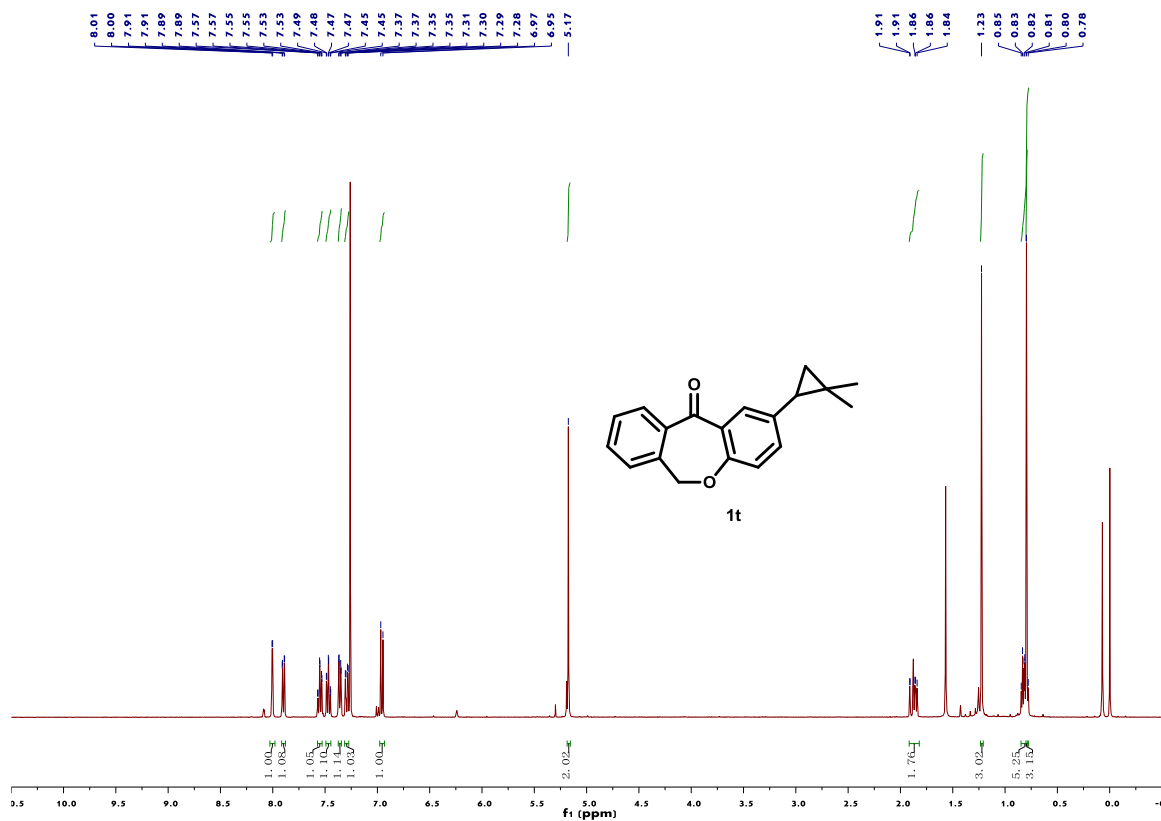

Supplementary Figure 58. <sup>1</sup>H NMR (400 MHz, CDCl<sub>3</sub>) spectrum for 1t

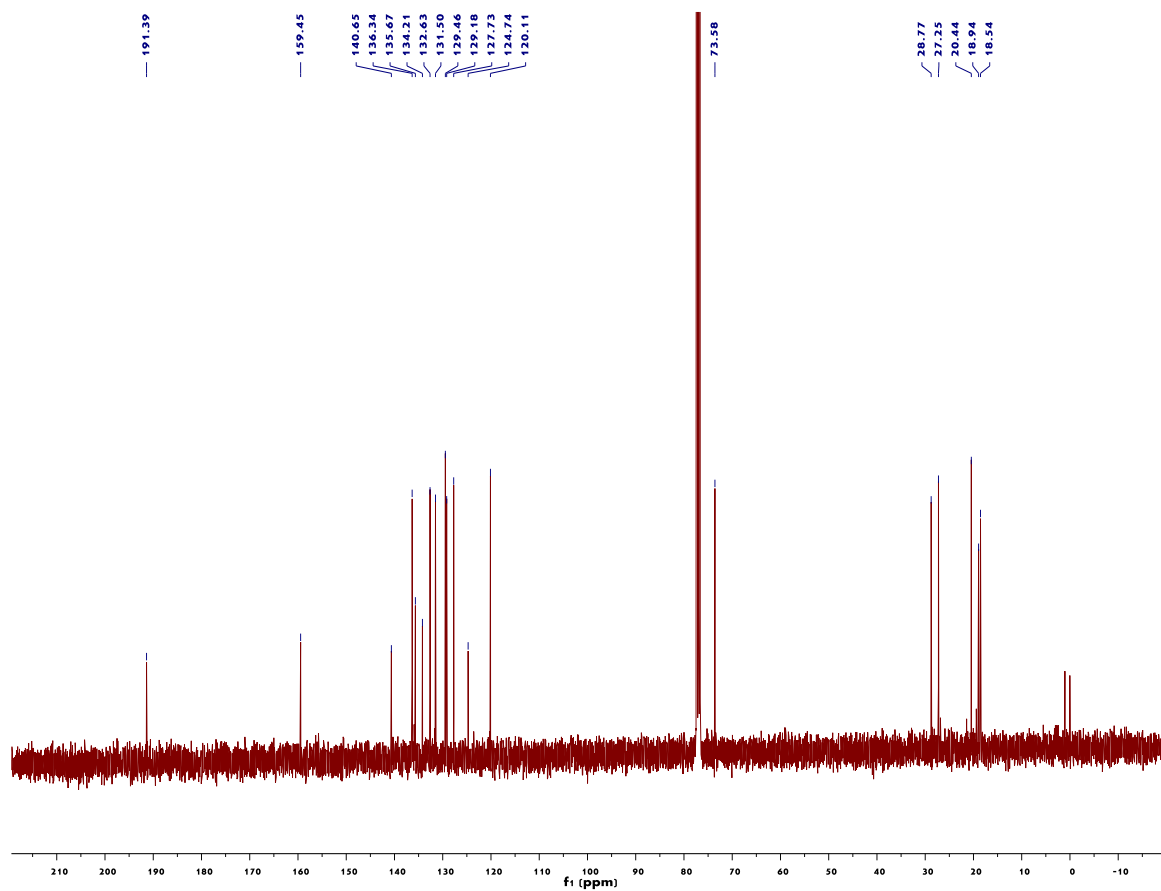

Supplementary Figure 59. <sup>13</sup>C NMR (100 MHz, CDCl<sub>3</sub>) spectrum for 1t

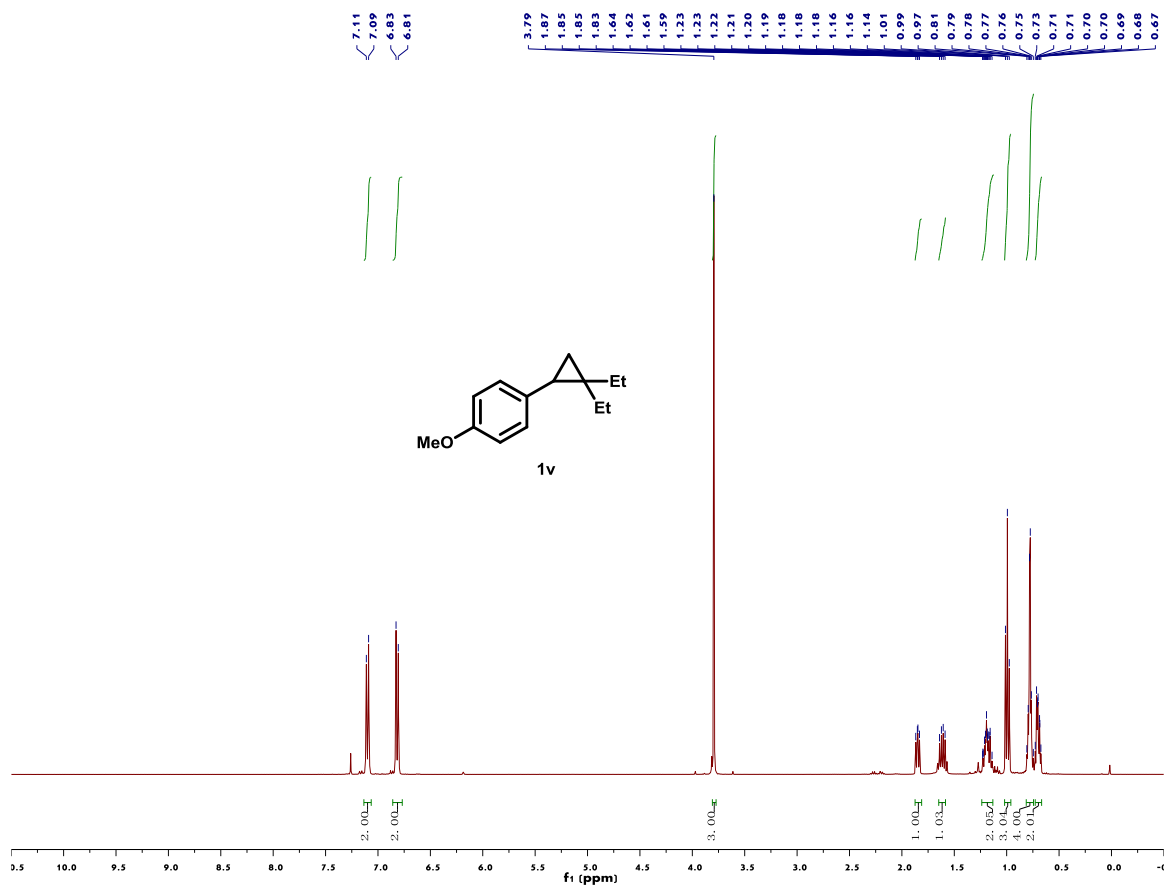

Supplementary Figure 60. <sup>1</sup>H NMR (400 MHz, CDCl<sub>3</sub>) spectrum for 1v

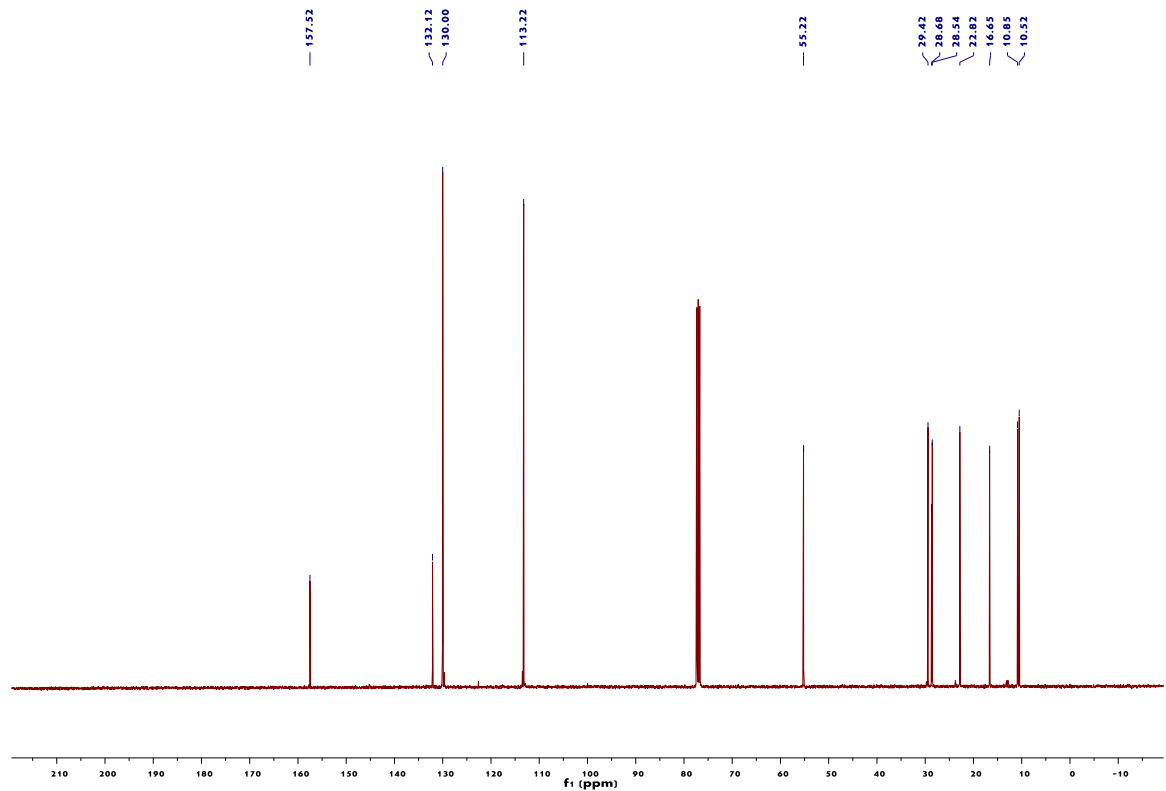

Supplementary Figure 61. <sup>13</sup>C NMR (100 MHz, CDCl<sub>3</sub>) spectrum for 1v



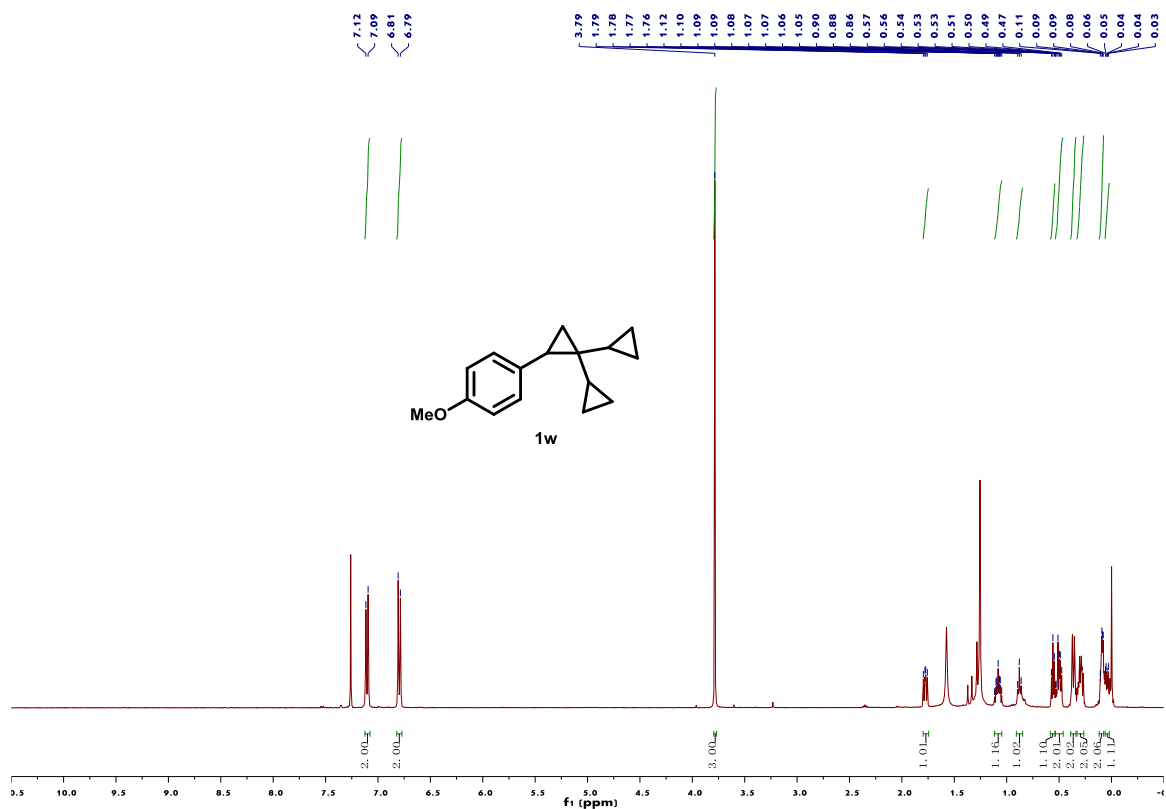

Supplementary Figure 62. <sup>1</sup>H NMR (400 MHz, CDCl<sub>3</sub>) spectrum for **1w**

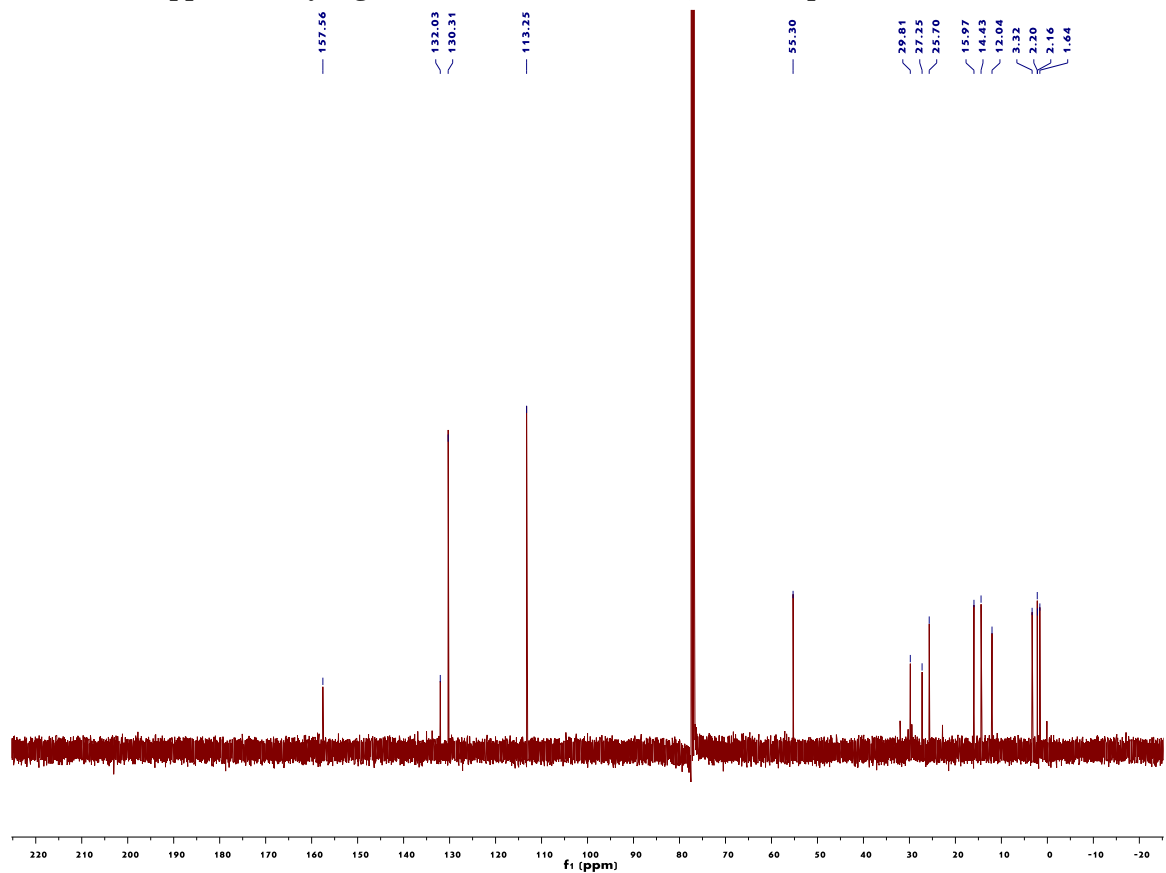

Supplementary Figure 63. <sup>13</sup>C NMR (100 MHz, CDCl<sub>3</sub>) spectrum for **1w**

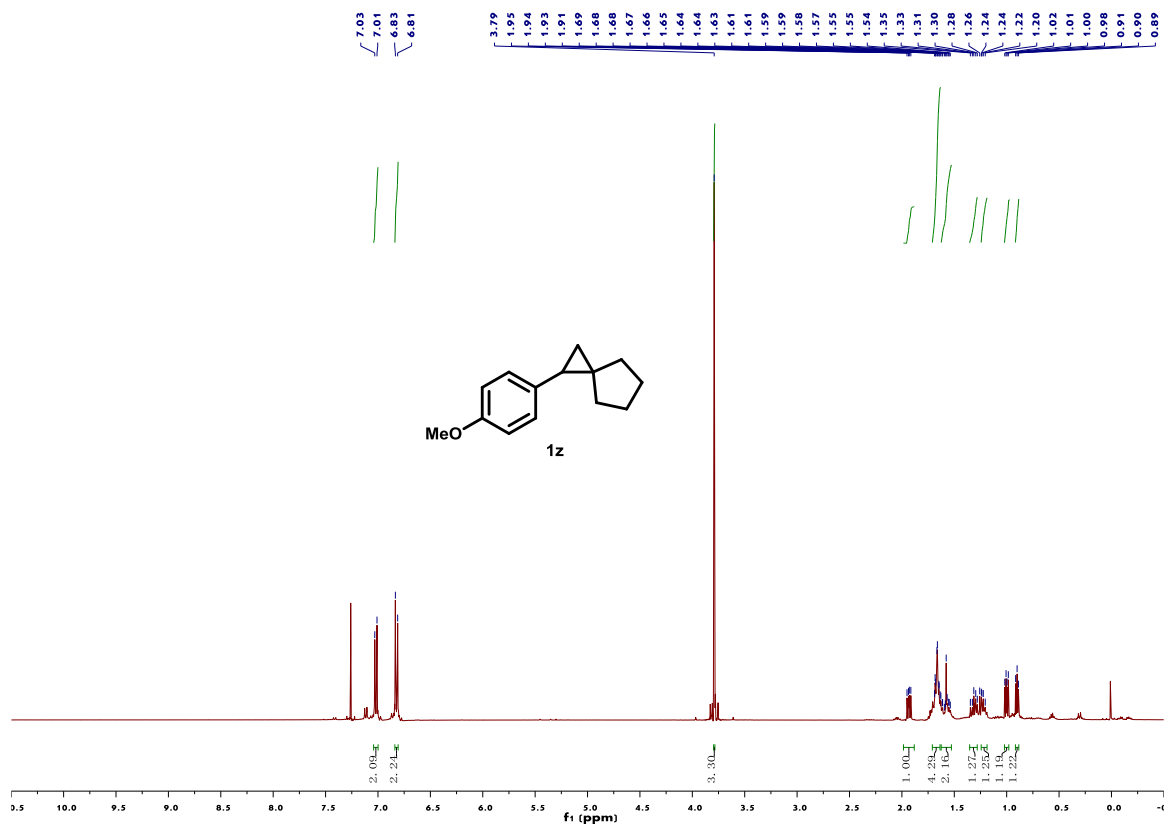

Supplementary Figure 64. <sup>1</sup>H NMR (400 MHz, CDCl<sub>3</sub>) spectrum for 1z

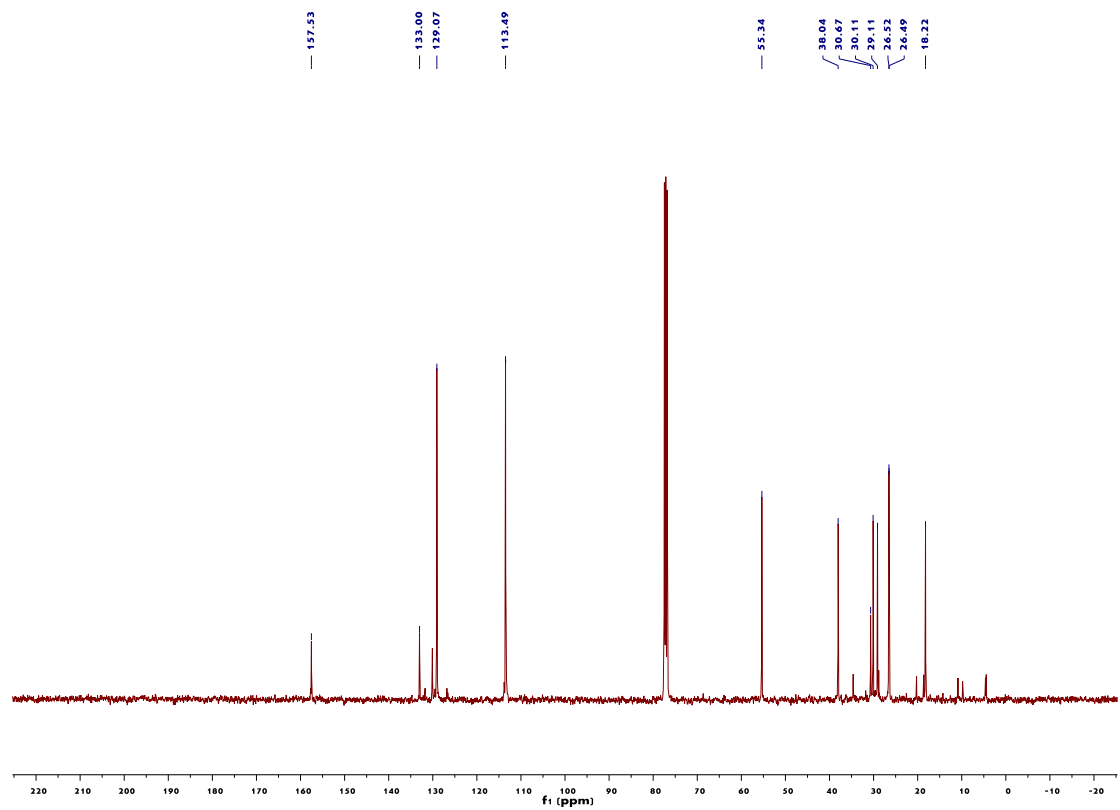

Supplementary Figure 65. <sup>13</sup>C NMR (100 MHz, CDCl<sub>3</sub>) spectrum for 1z

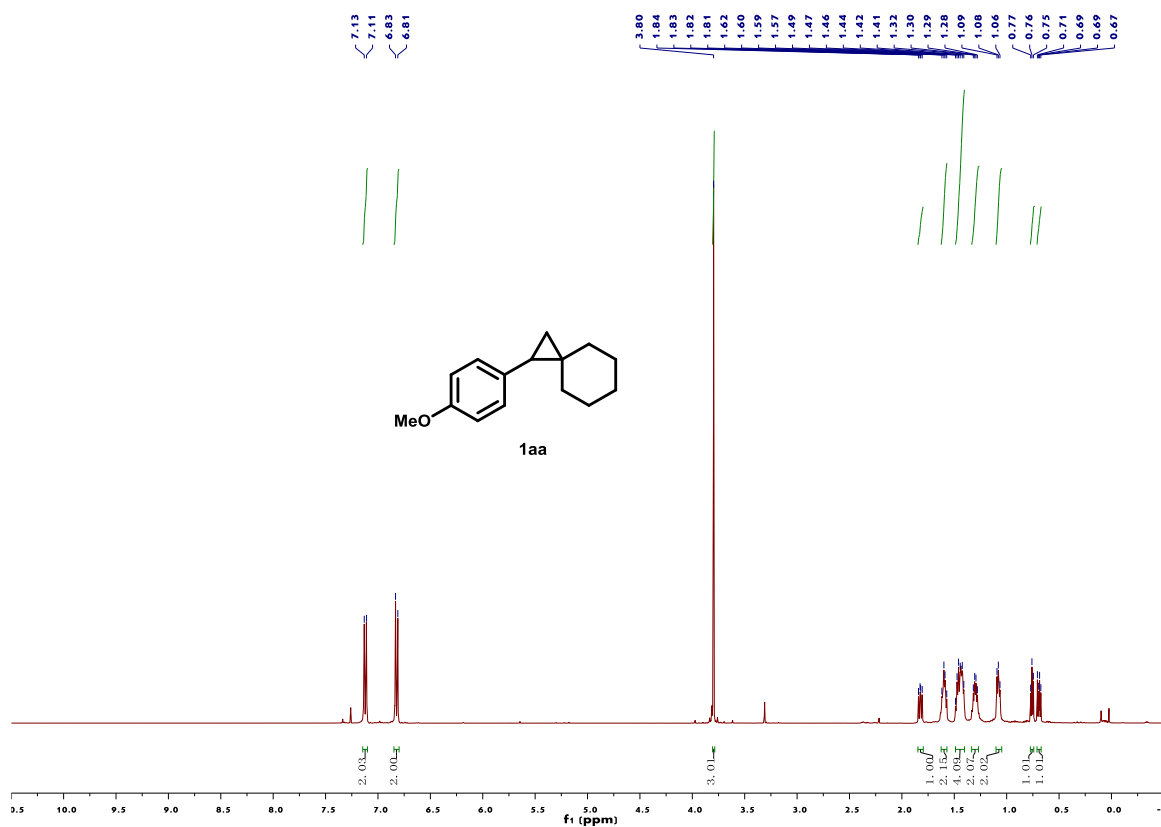

Supplementary Figure 66. <sup>1</sup>H NMR (400 MHz, CDCl<sub>3</sub>) spectrum for 1aa

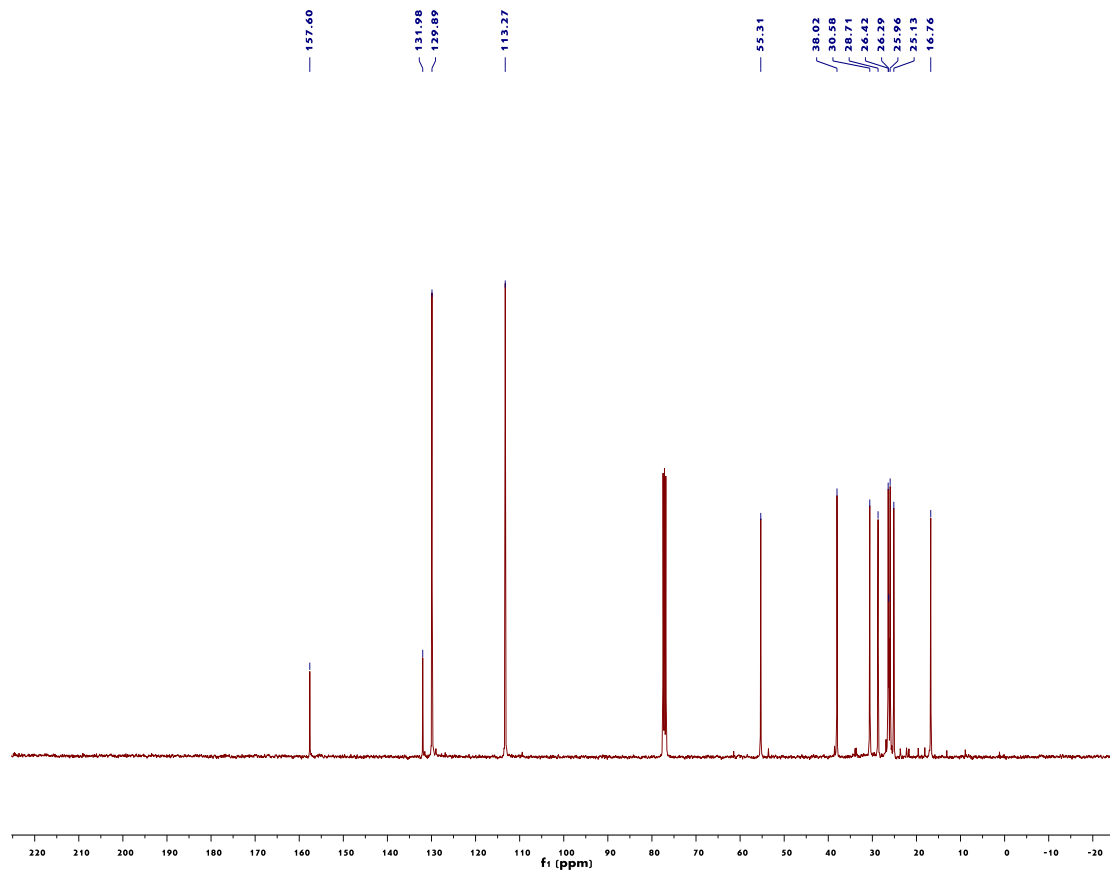

Supplementary Figure 67. <sup>13</sup>C NMR (100 MHz, CDCl<sub>3</sub>) spectrum for 1aa

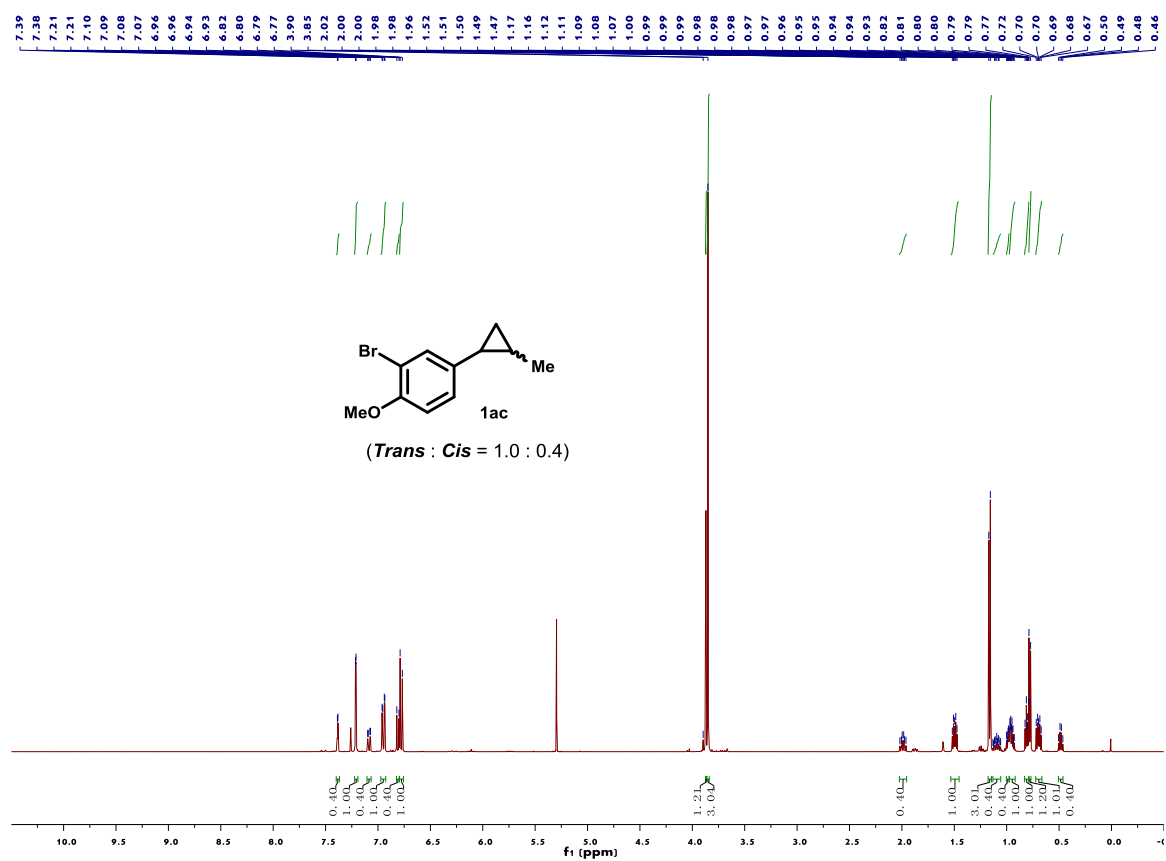

Supplementary Figure 68. <sup>1</sup>H NMR (400 MHz, CDCl<sub>3</sub>) spectrum for 1ac

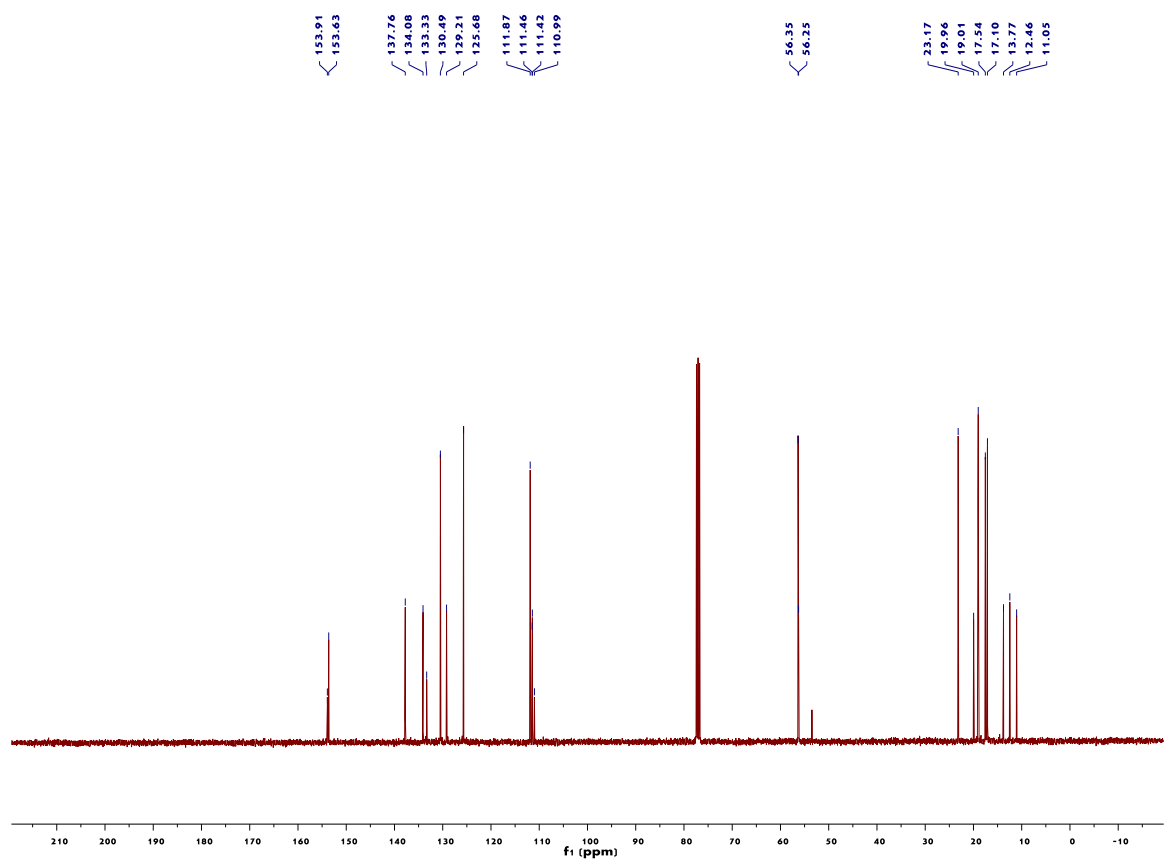

Supplementary Figure 69. <sup>13</sup>C NMR (100 MHz, CDCl<sub>3</sub>) spectrum for 1ac



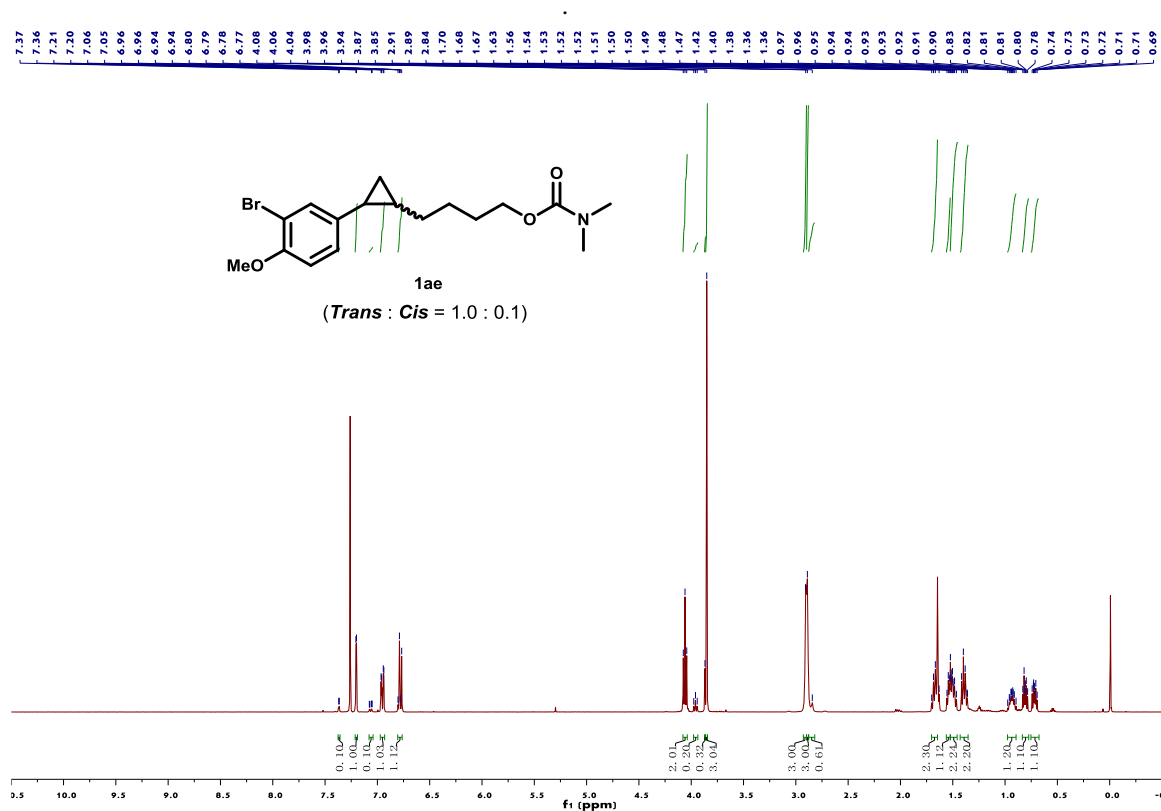

Supplementary Figure 72.  $^1\text{H}$  NMR (400 MHz,  $\text{CDCl}_3$ ) spectrum for 1ae

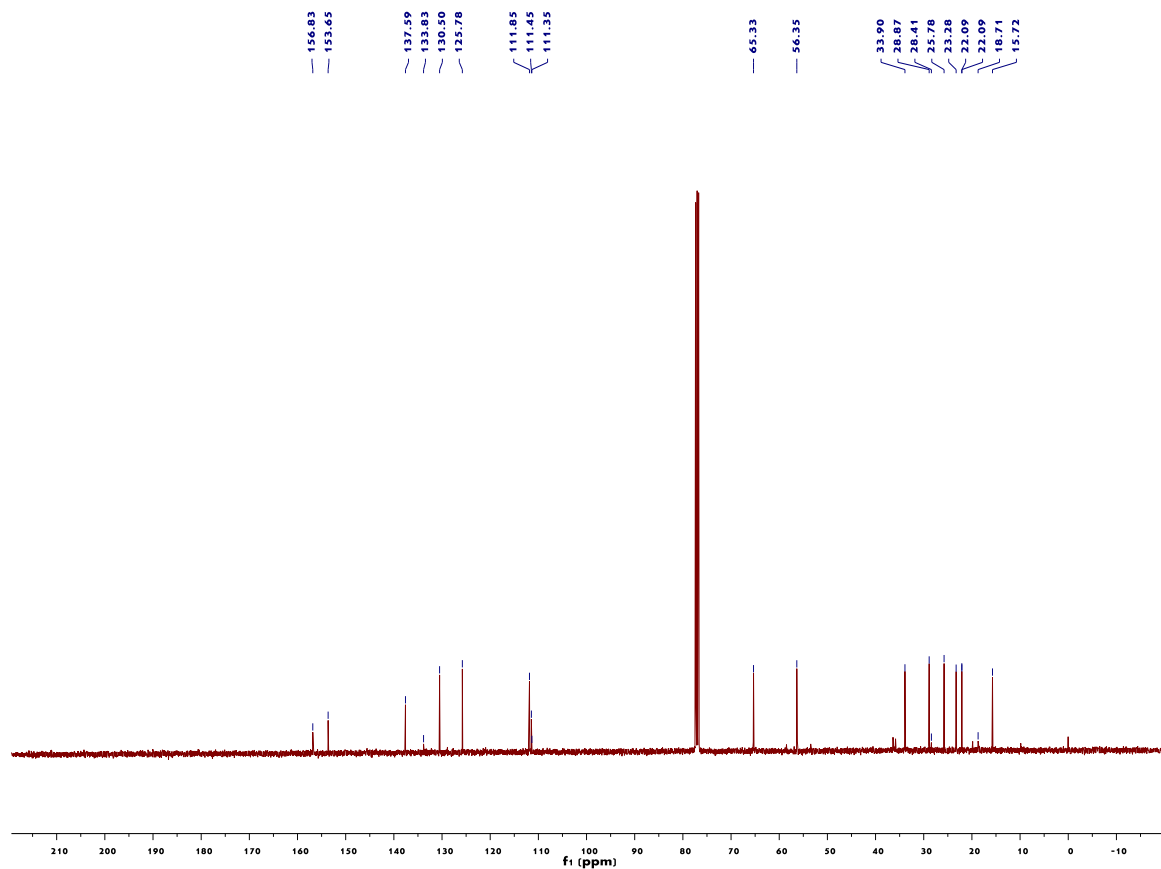

Supplementary Figure 73.  $^{13}\text{C}$  NMR (100 MHz,  $\text{CDCl}_3$ ) spectrum for 1ae

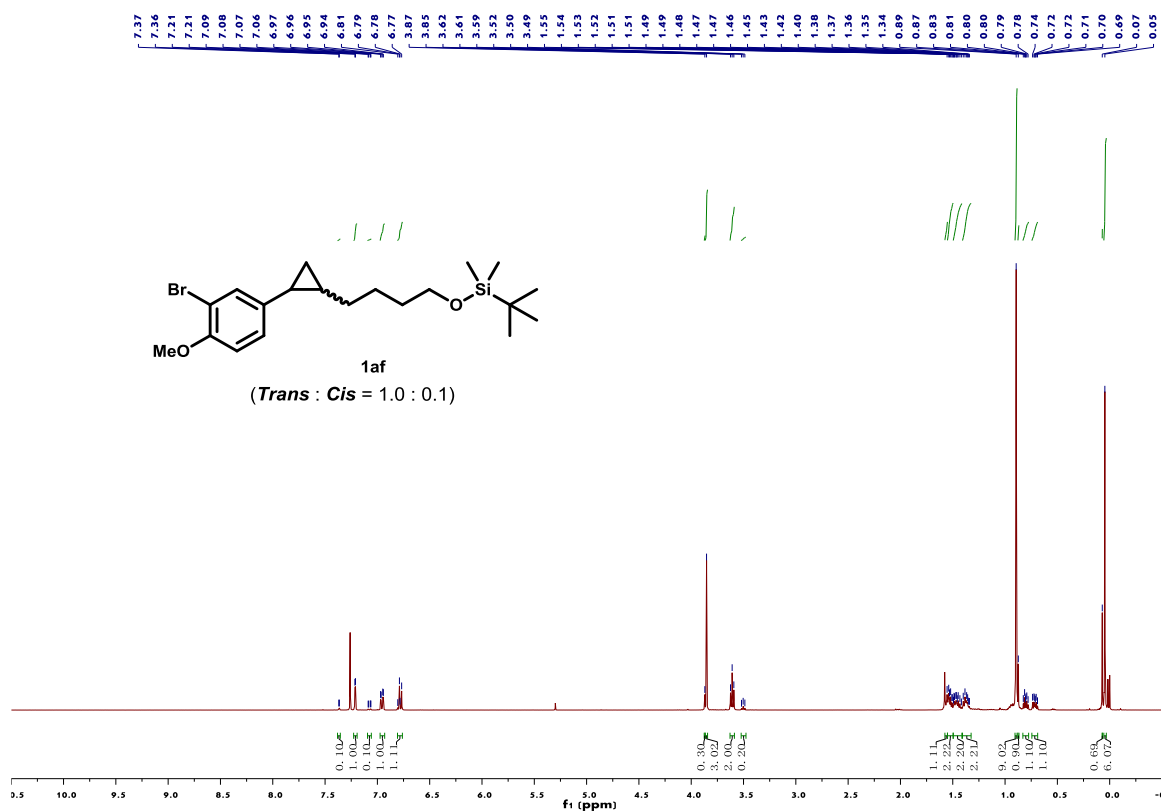

Supplementary Figure 74. <sup>1</sup>H NMR (400 MHz, CDCl<sub>3</sub>) spectrum for 1af

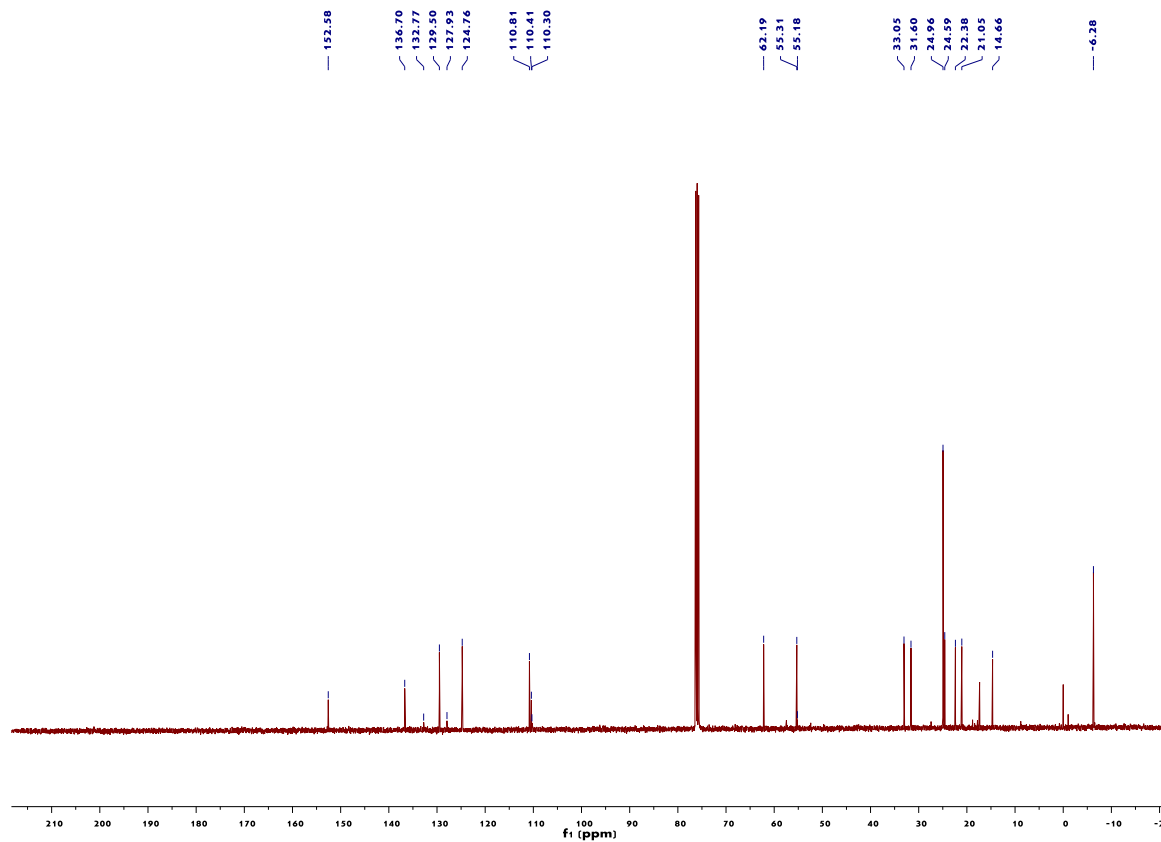

Supplementary Figure 75. <sup>13</sup>C NMR (100 MHz, CDCl<sub>3</sub>) spectrum for 1af

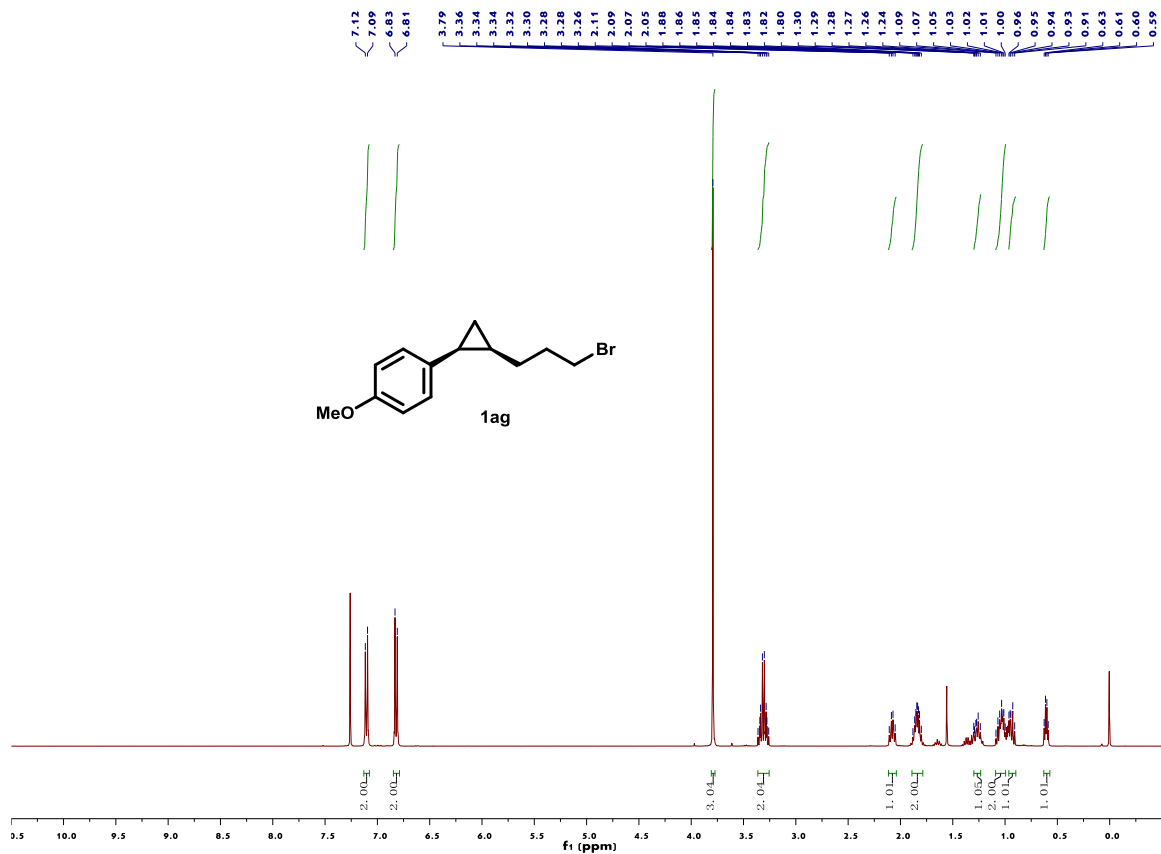

Supplementary Figure 76. <sup>1</sup>H NMR (400 MHz, CDCl<sub>3</sub>) spectrum for 1ag

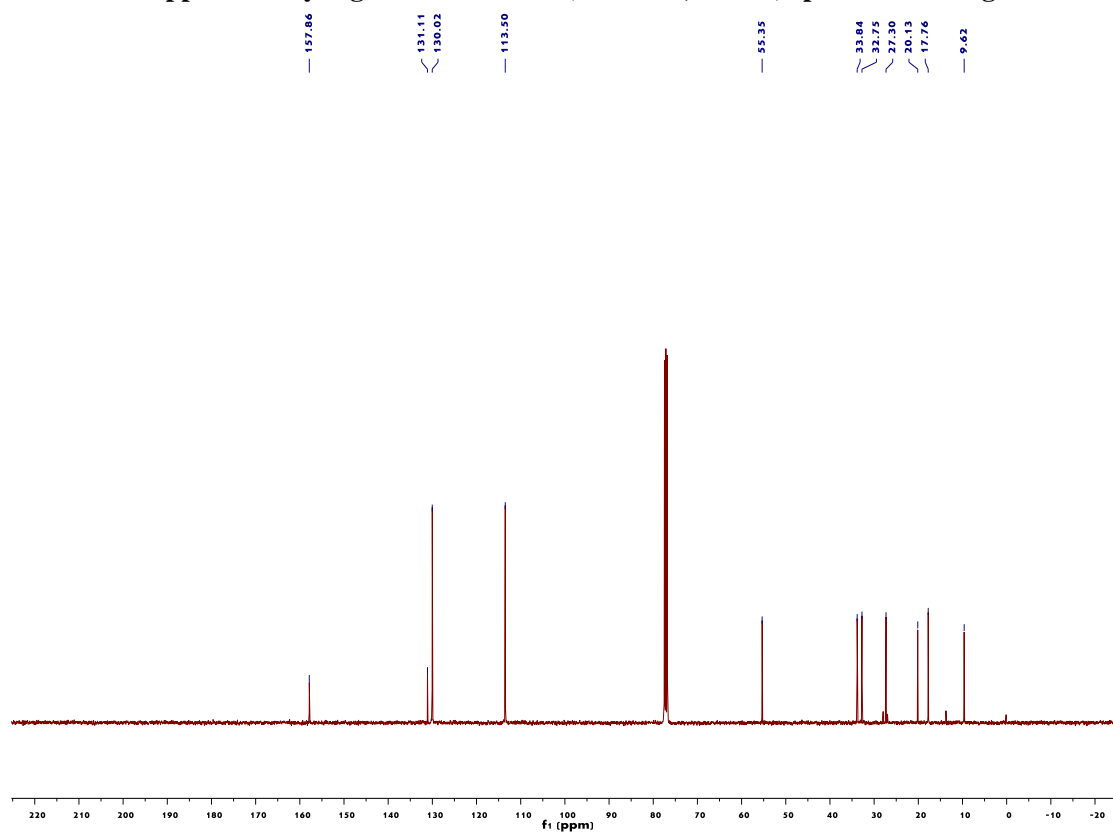

Supplementary Figure 77. <sup>13</sup>C NMR (100 MHz, CDCl<sub>3</sub>) spectrum for 1ag



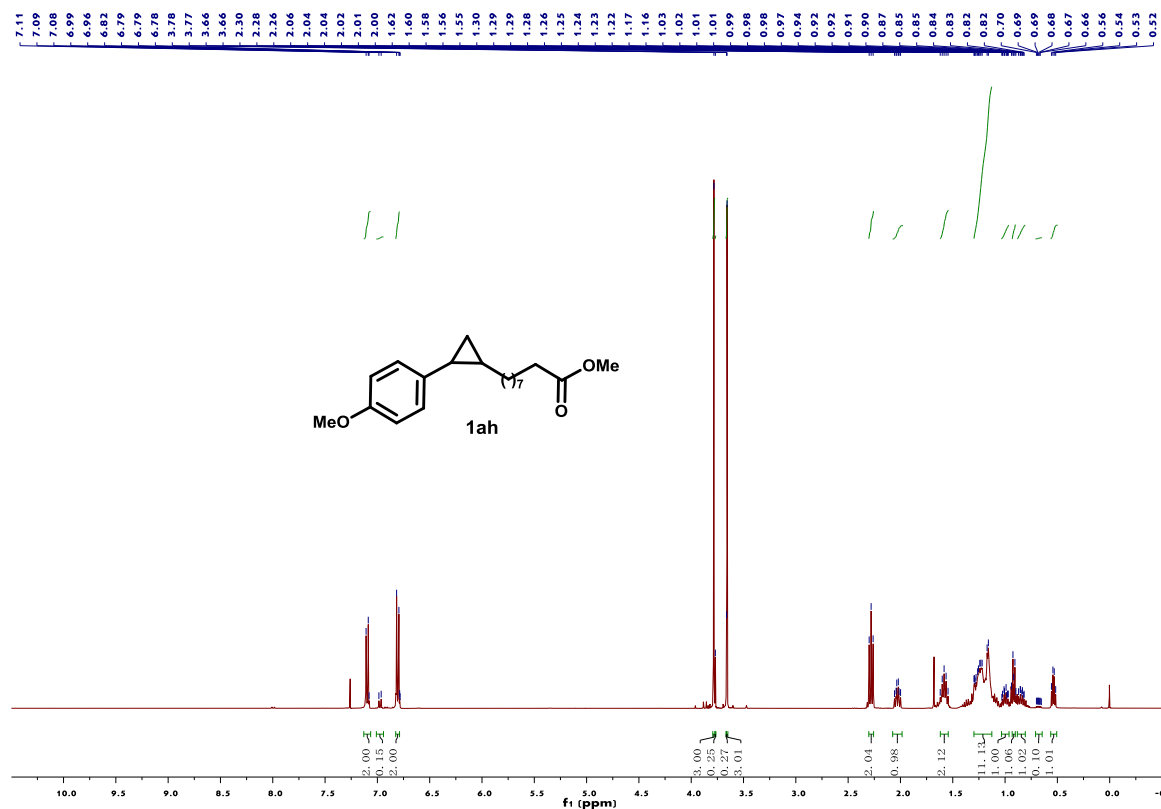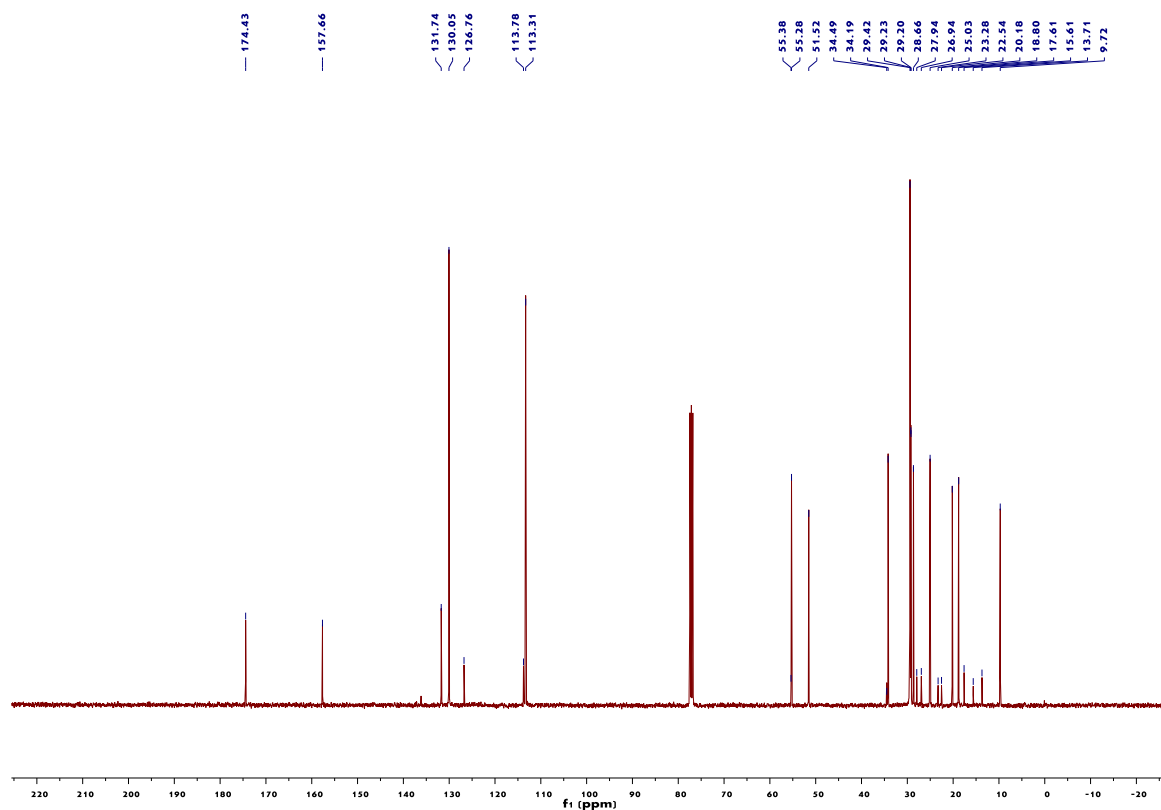



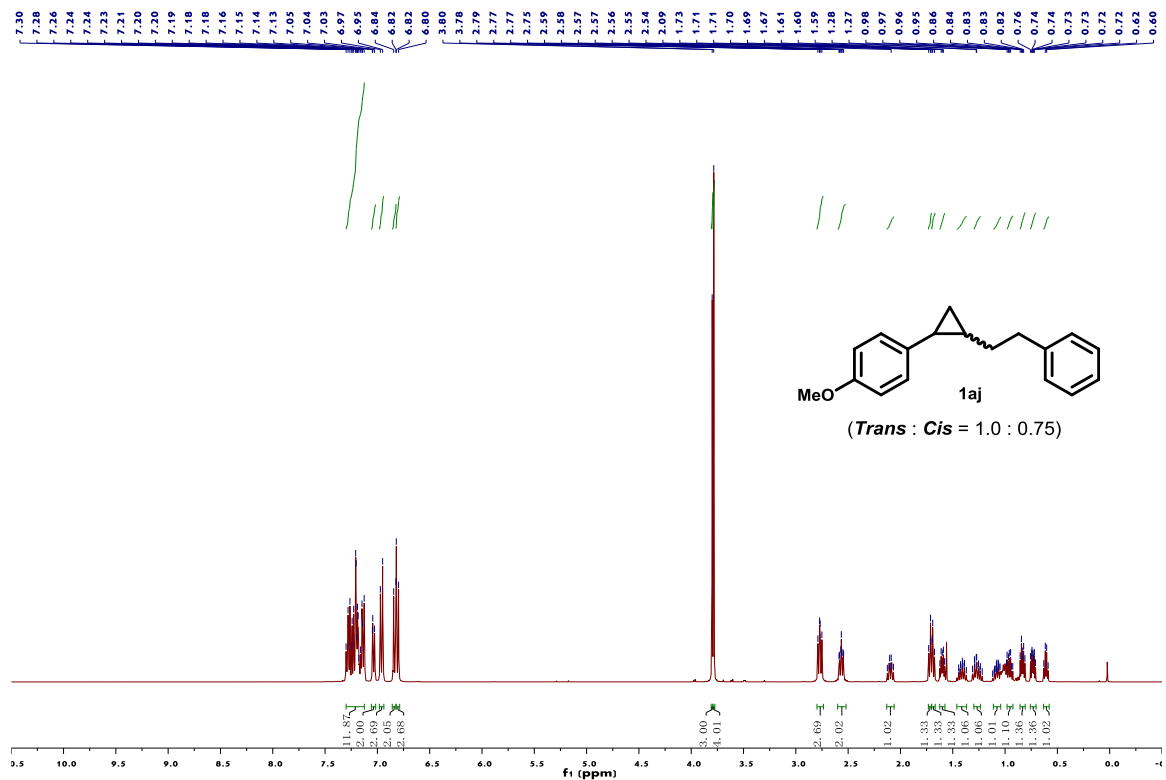

Supplementary Figure 82. <sup>1</sup>H NMR (400 MHz, CDCl<sub>3</sub>) spectrum for 1aj

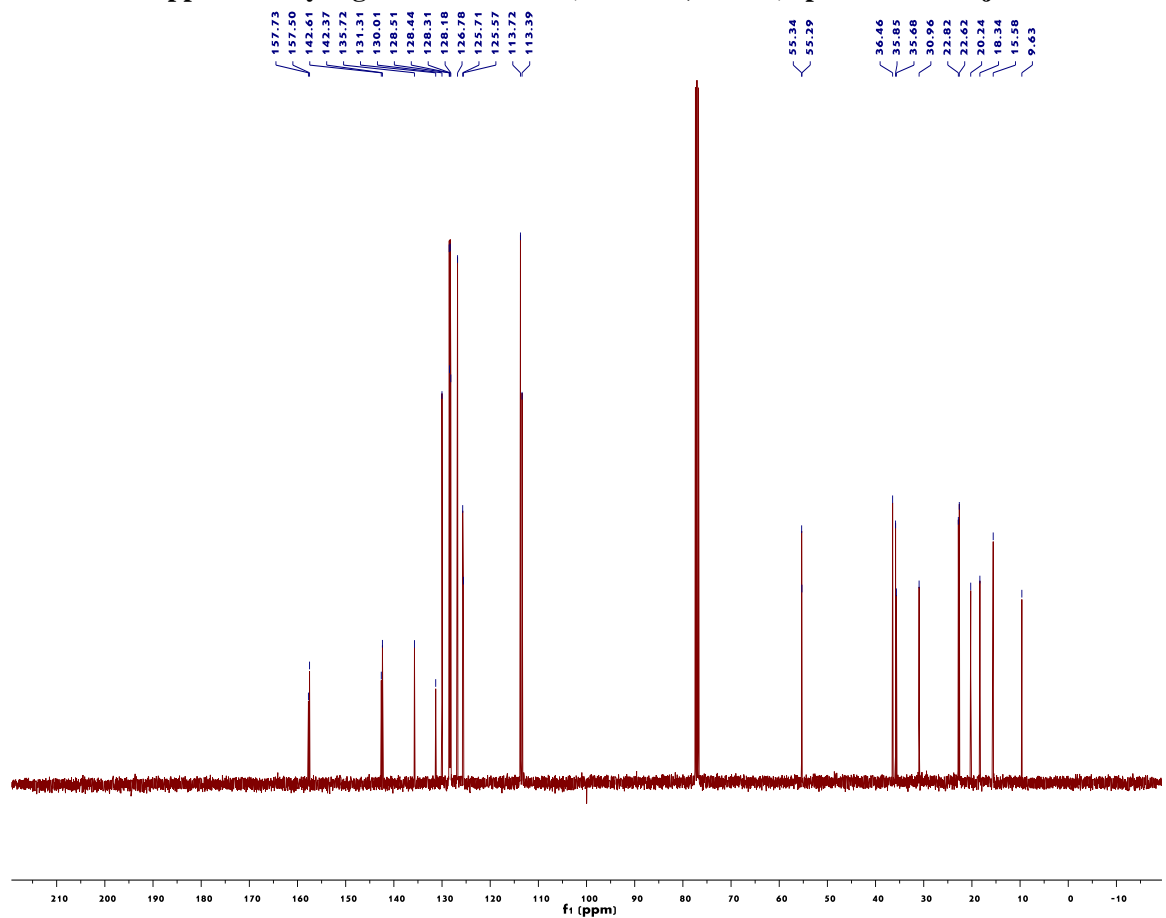

Supplementary Figure 83. <sup>13</sup>C NMR (100 MHz, CDCl<sub>3</sub>) spectrum for 1aj

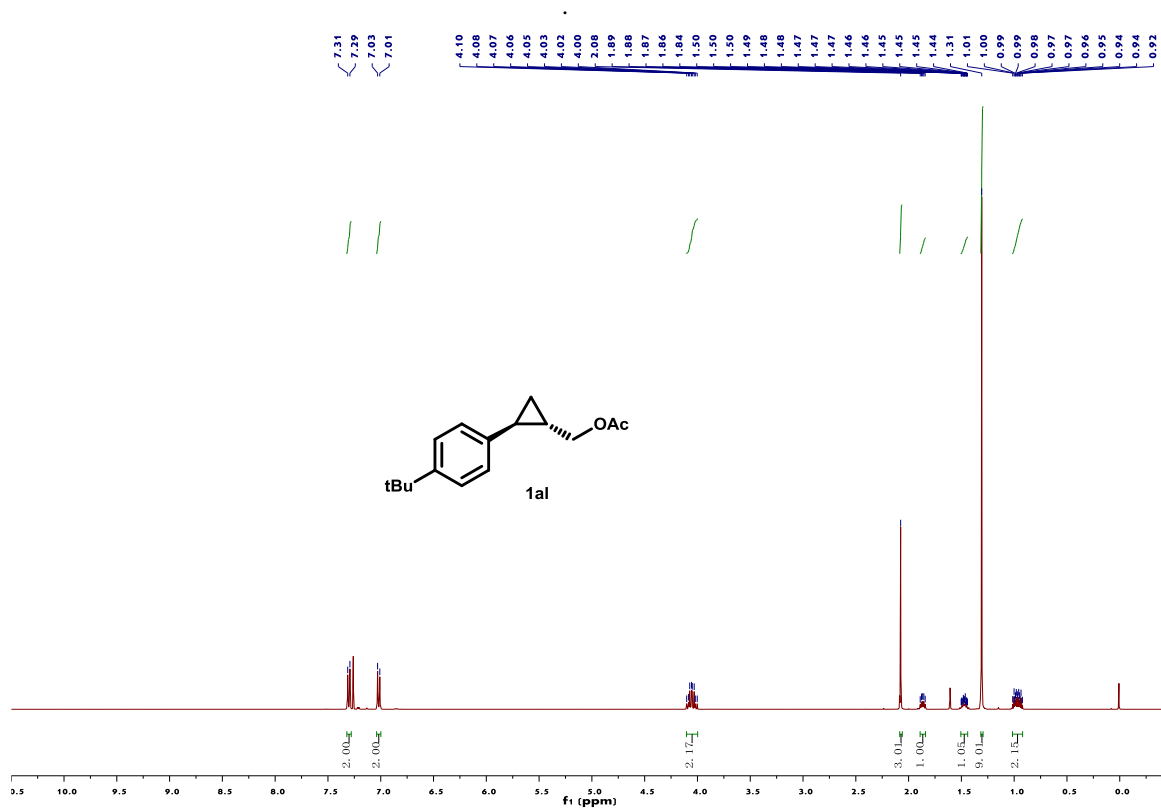

Supplementary Figure 84. <sup>1</sup>H NMR (400 MHz, CDCl<sub>3</sub>) spectrum for 1al

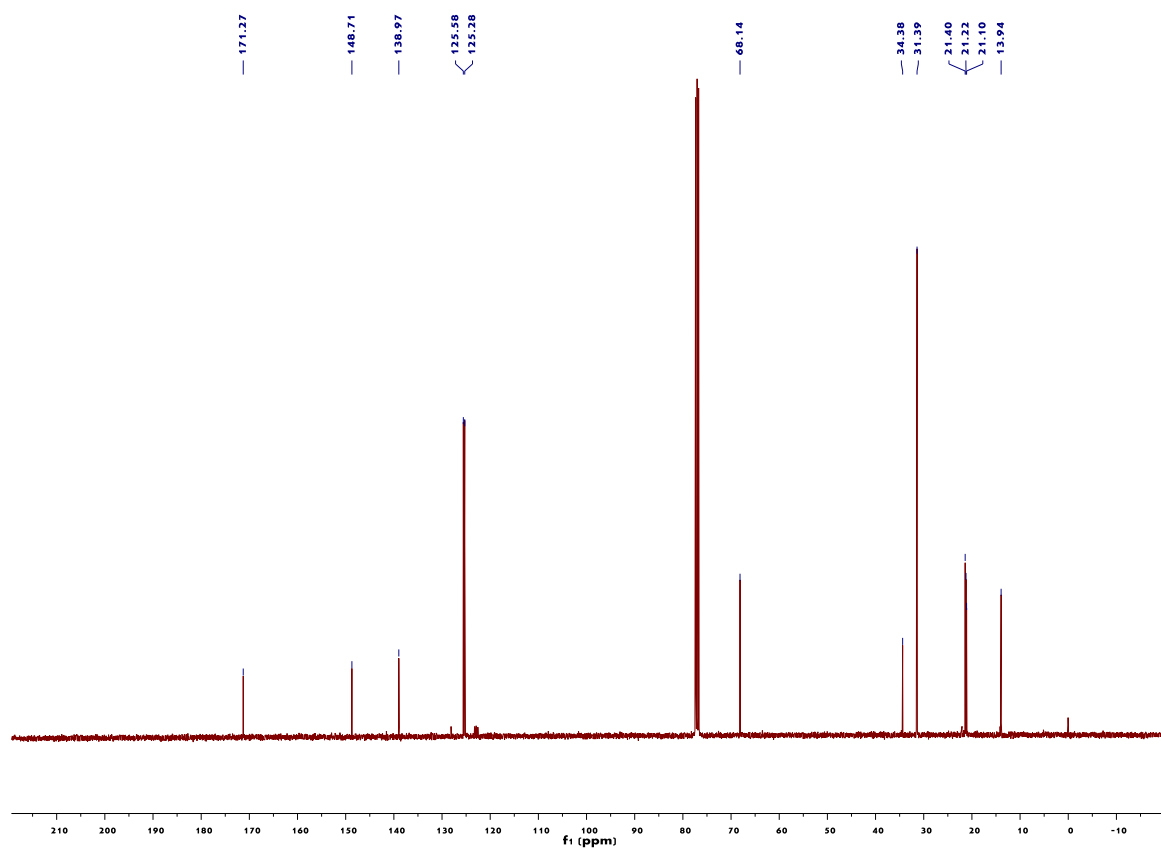

Supplementary Figure 85. <sup>13</sup>C NMR (100 MHz, CDCl<sub>3</sub>) spectrum for 1al



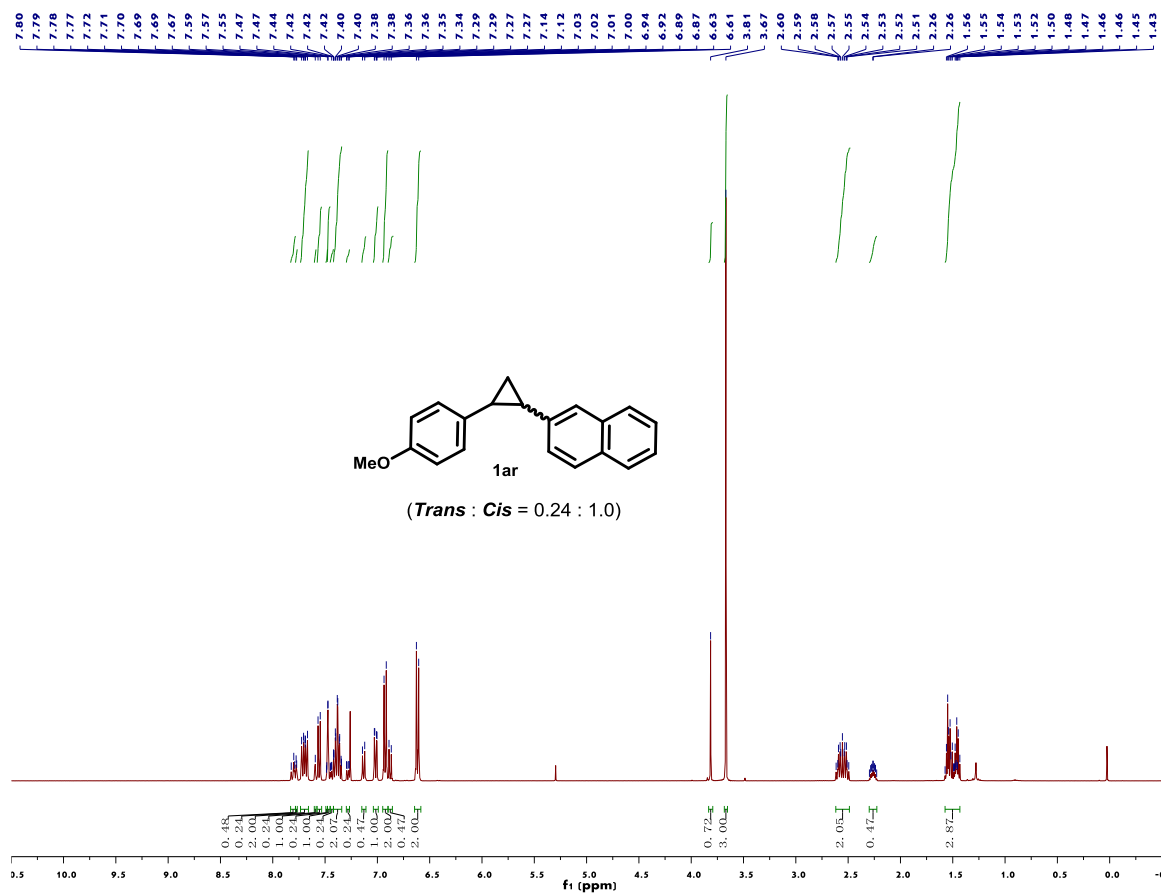

Supplementary Figure 88.  $^1\text{H}$  NMR (400 MHz,  $\text{CDCl}_3$ ) spectrum for 1ar

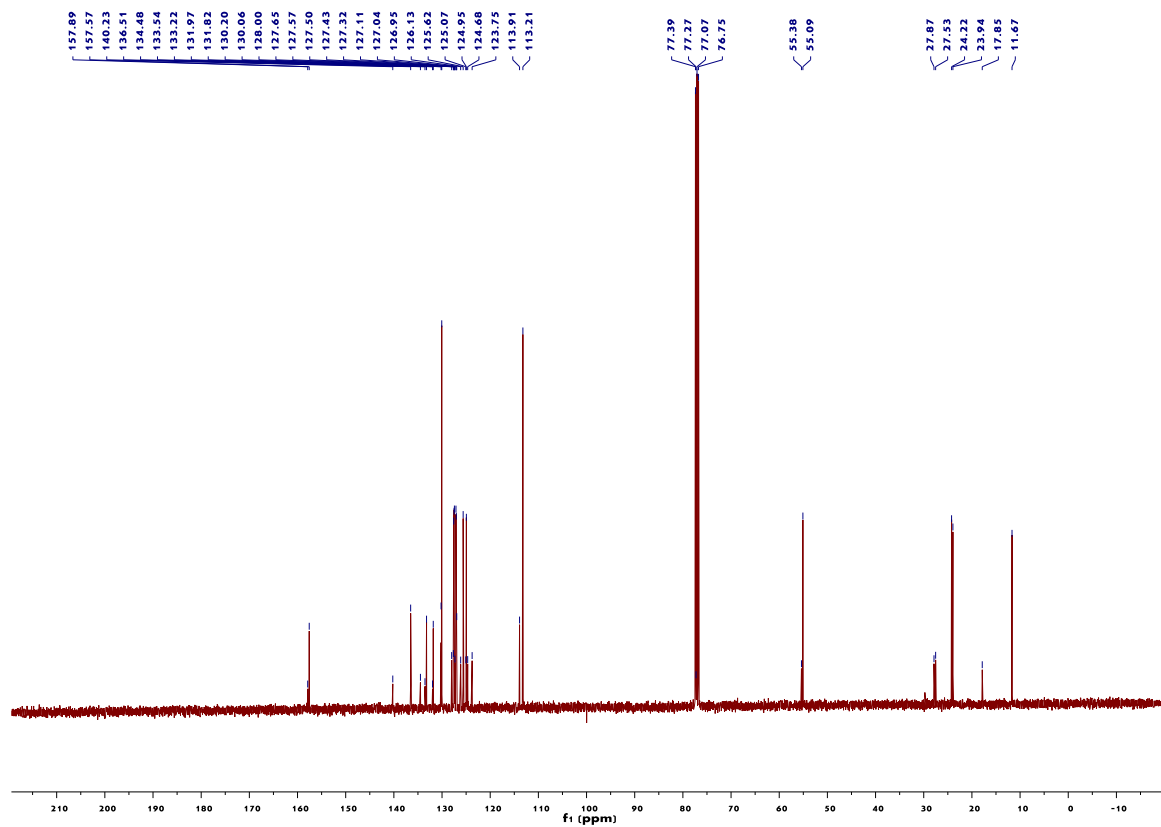

Supplementary Figure 89.  $^{13}\text{C}$  NMR (100 MHz,  $\text{CDCl}_3$ ) spectrum for 1ar

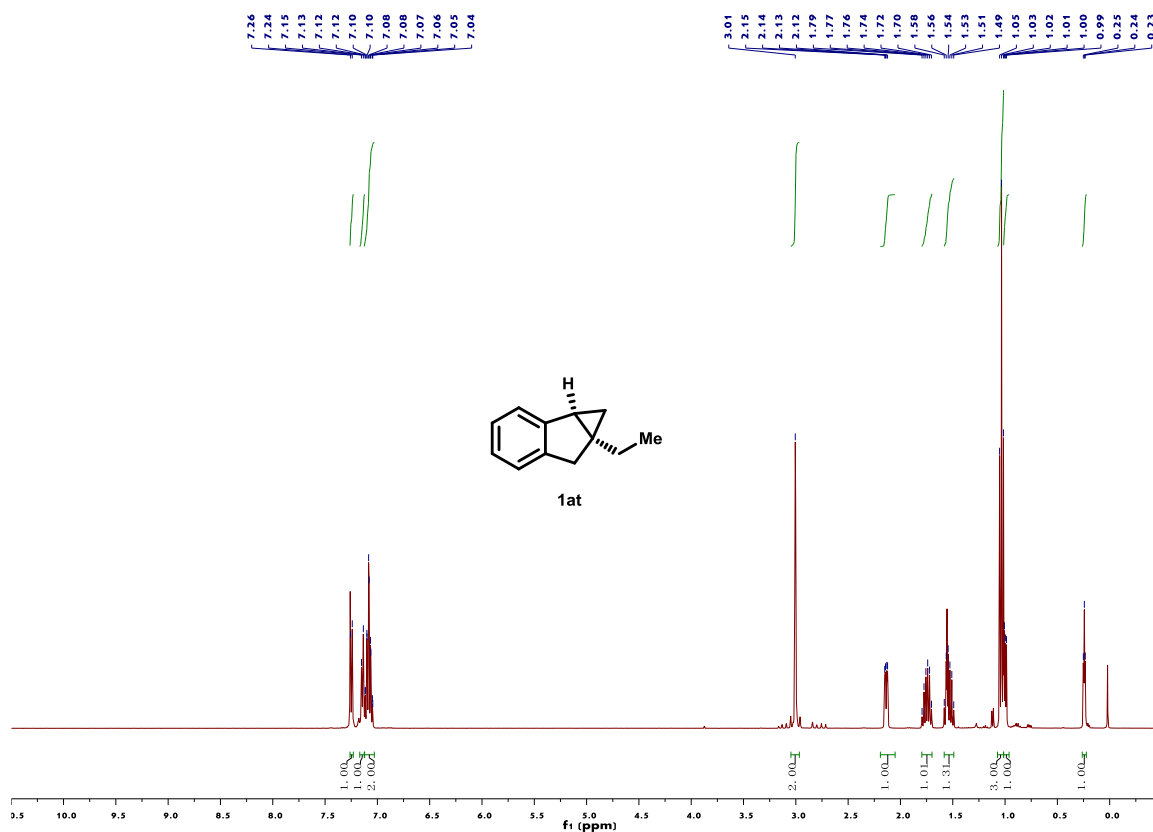

Supplementary Figure 90. <sup>1</sup>H NMR (400 MHz, CDCl<sub>3</sub>) spectrum for 1at

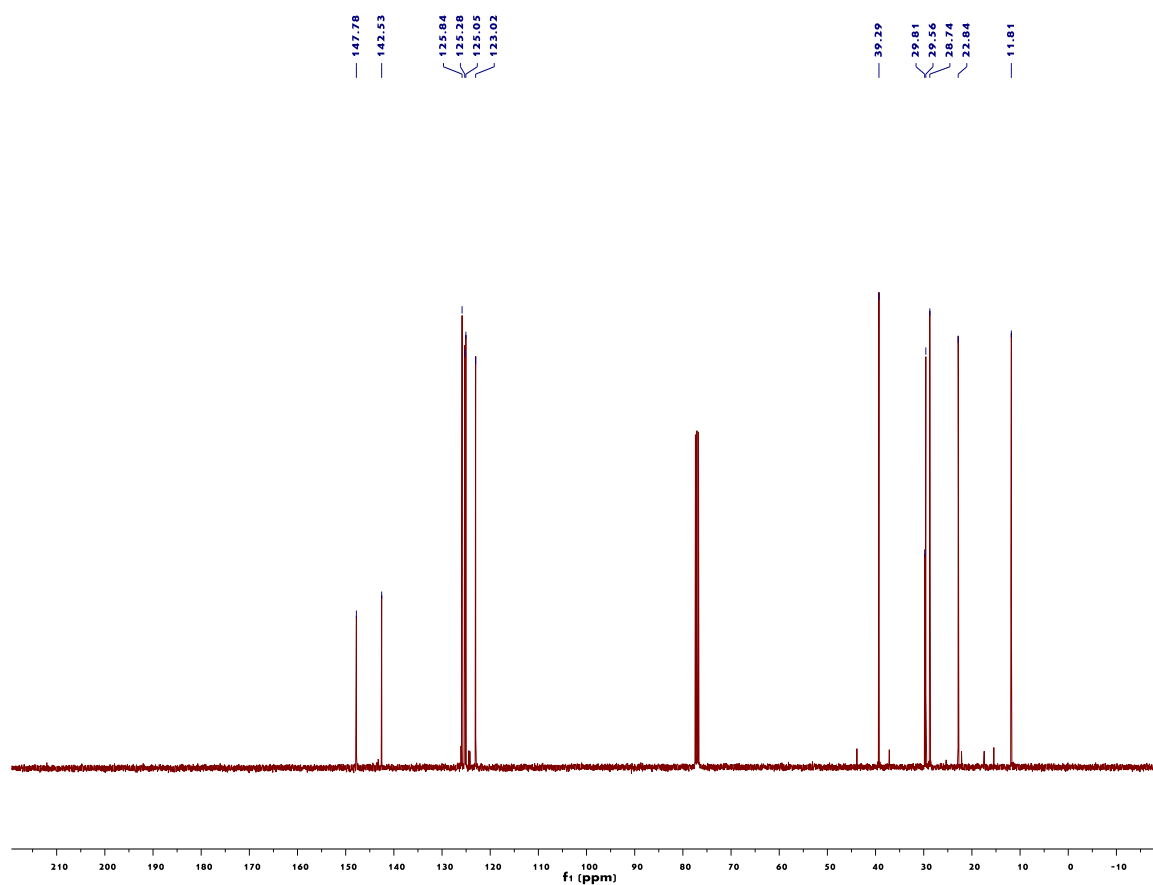

Supplementary Figure 91. <sup>13</sup>C NMR (100 MHz, CDCl<sub>3</sub>) spectrum for 1at

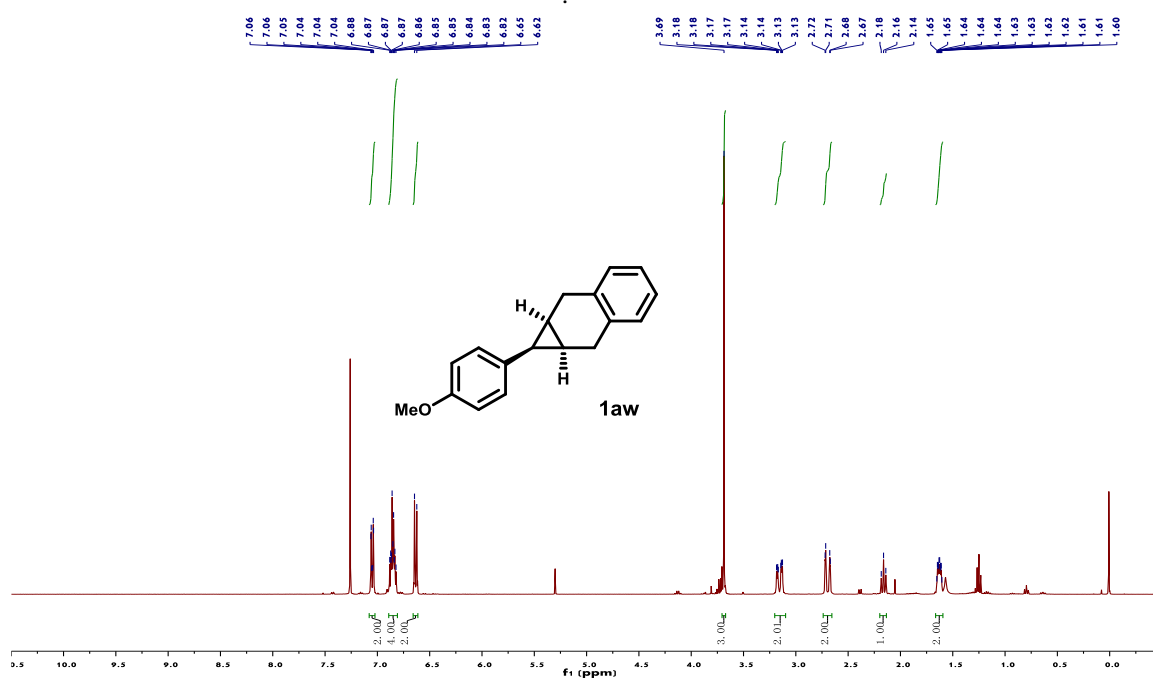

Supplementary Figure 92. <sup>1</sup>H NMR (400 MHz, CDCl<sub>3</sub>) spectrum for 1aw

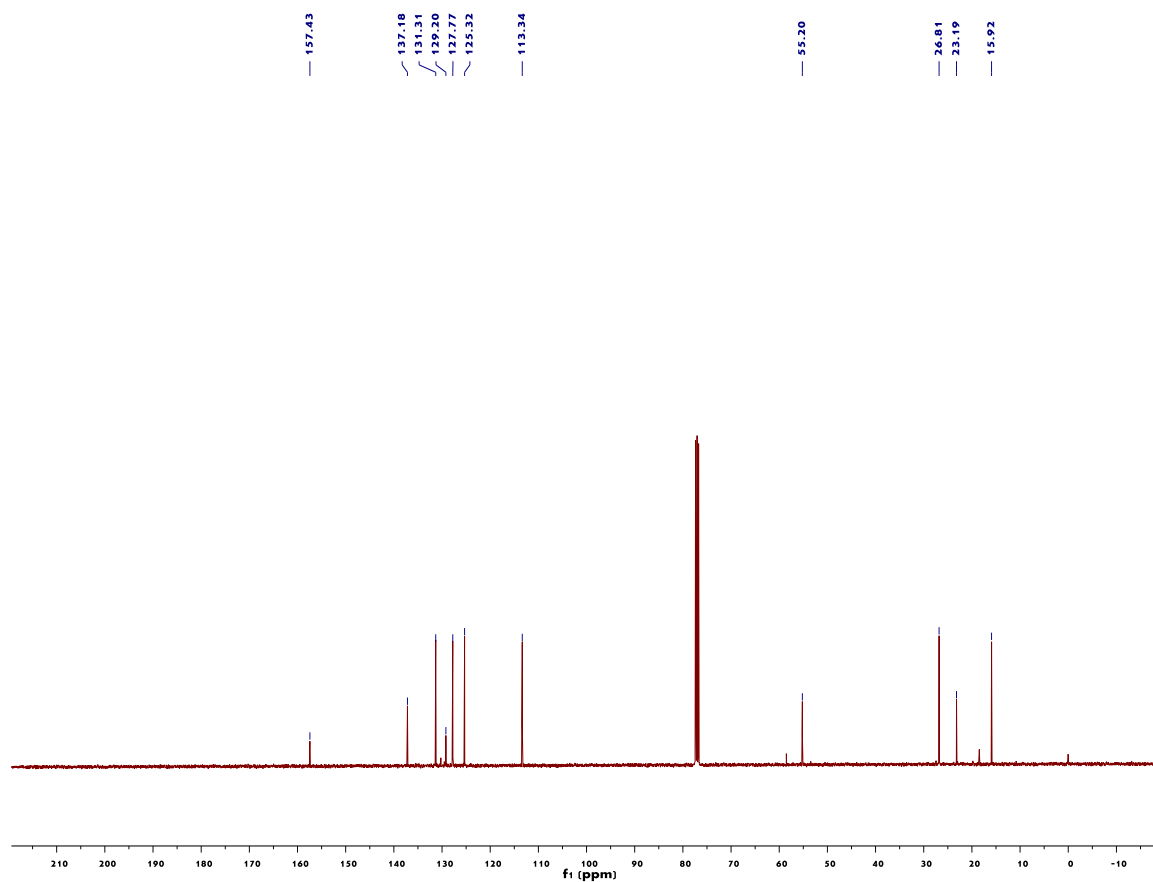

Supplementary Figure 93. <sup>13</sup>C NMR (100 MHz, CDCl<sub>3</sub>) spectrum for 1aw



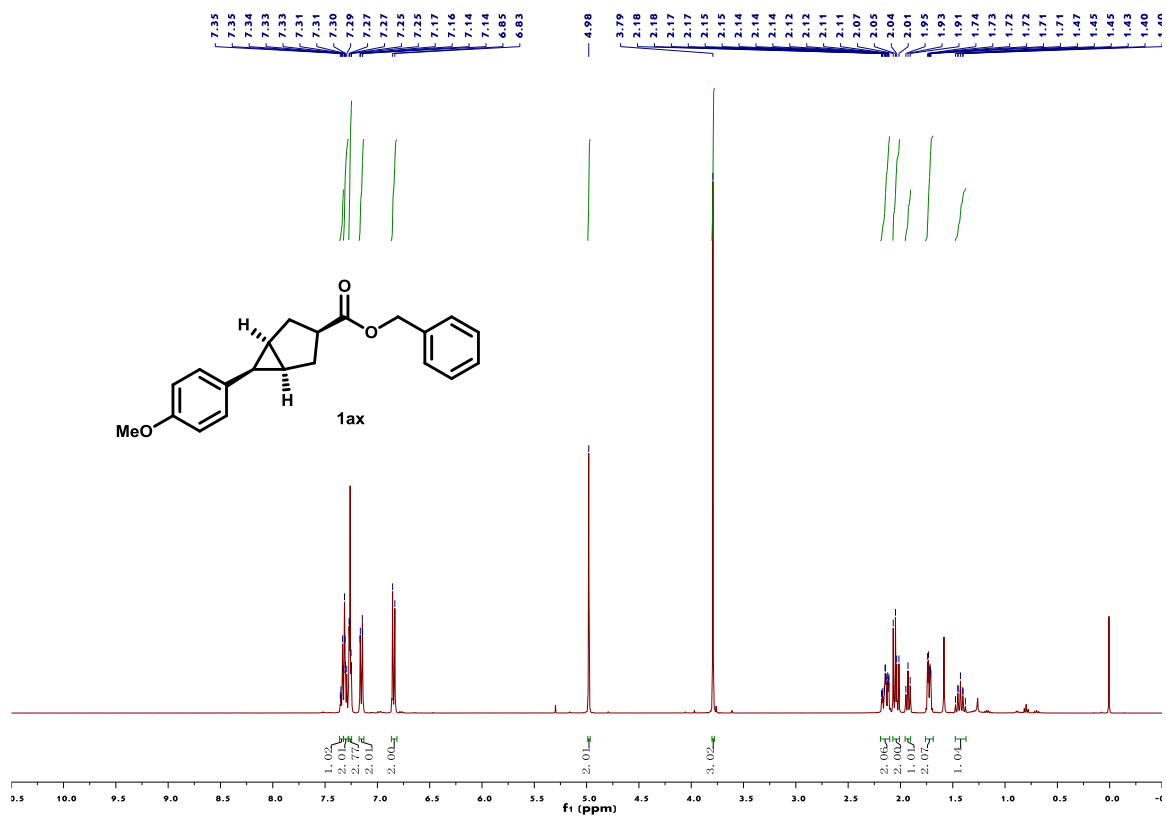

Supplementary Figure 94. <sup>1</sup>H NMR (400 MHz, CDCl<sub>3</sub>) spectrum for **1ax**

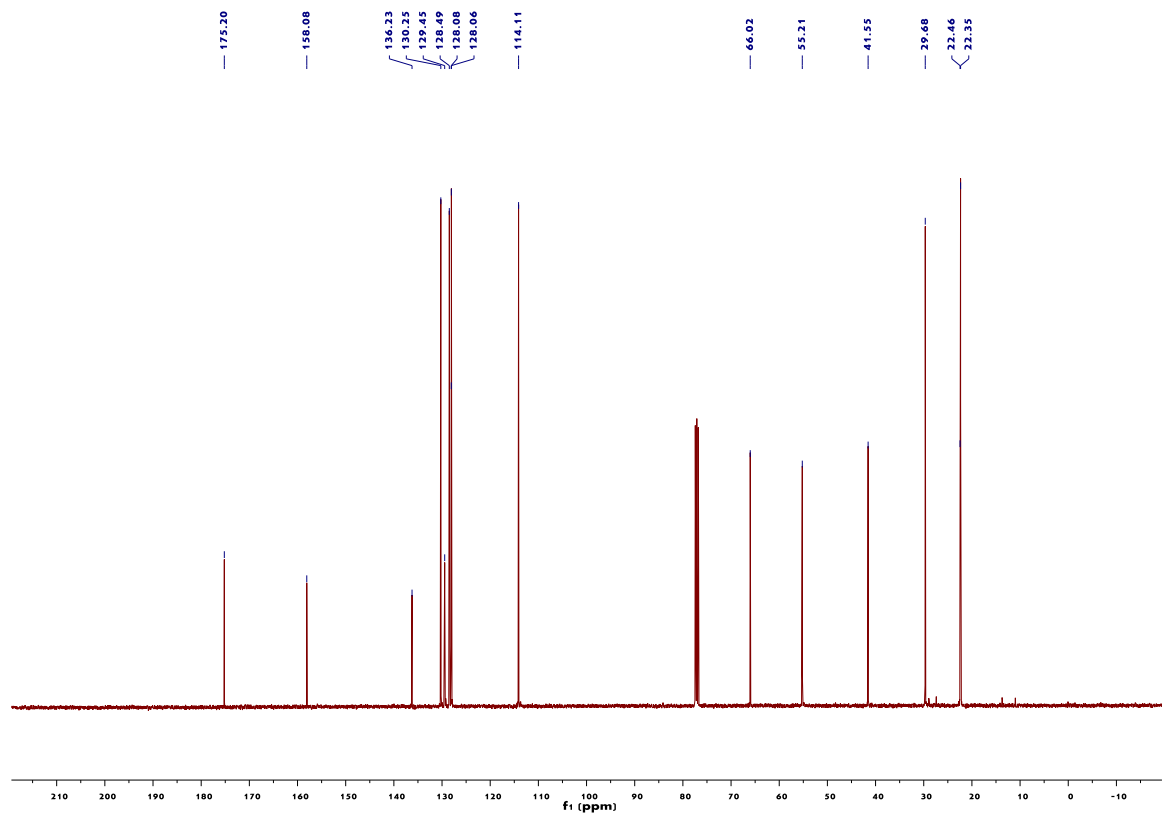

Supplementary Figure 95. <sup>13</sup>C NMR (100 MHz, CDCl<sub>3</sub>) spectrum for **1ax**

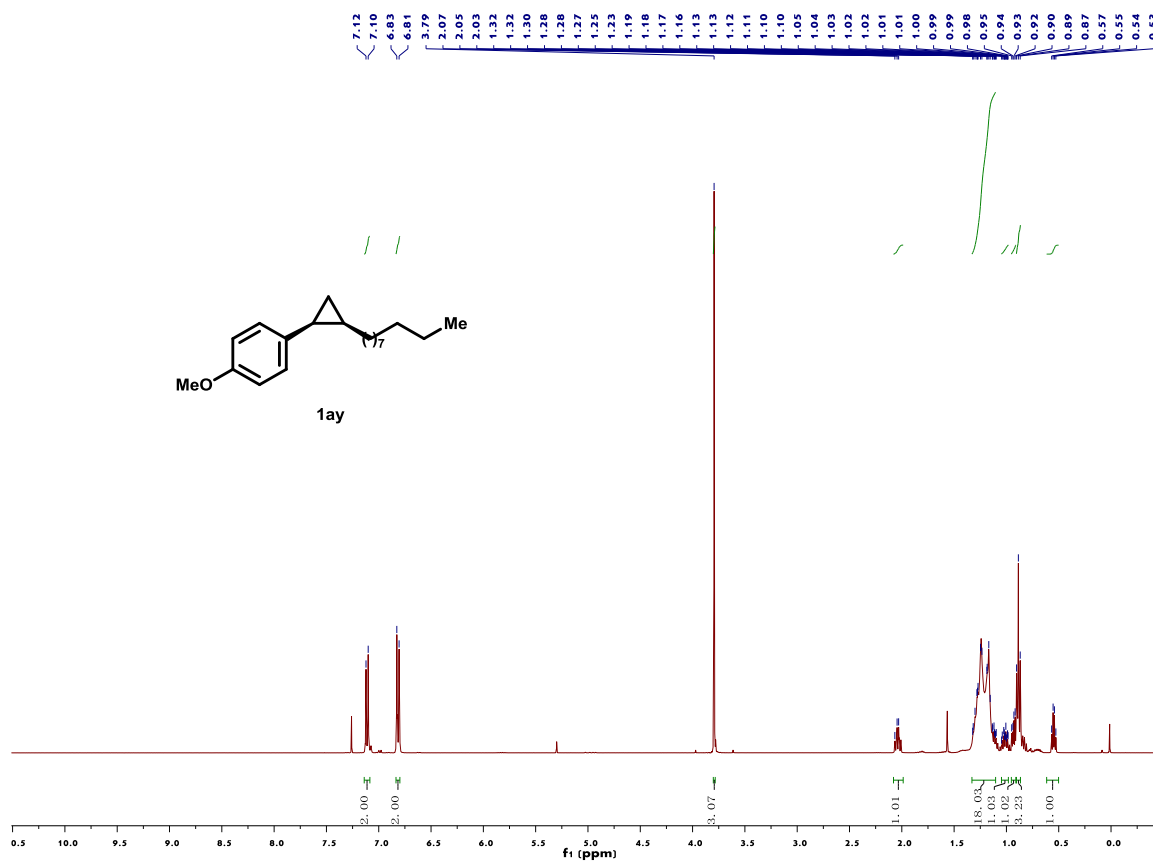

Supplementary Figure 96.  $^1\text{H}$  NMR (400 MHz,  $\text{CDCl}_3$ ) spectrum for 1ay

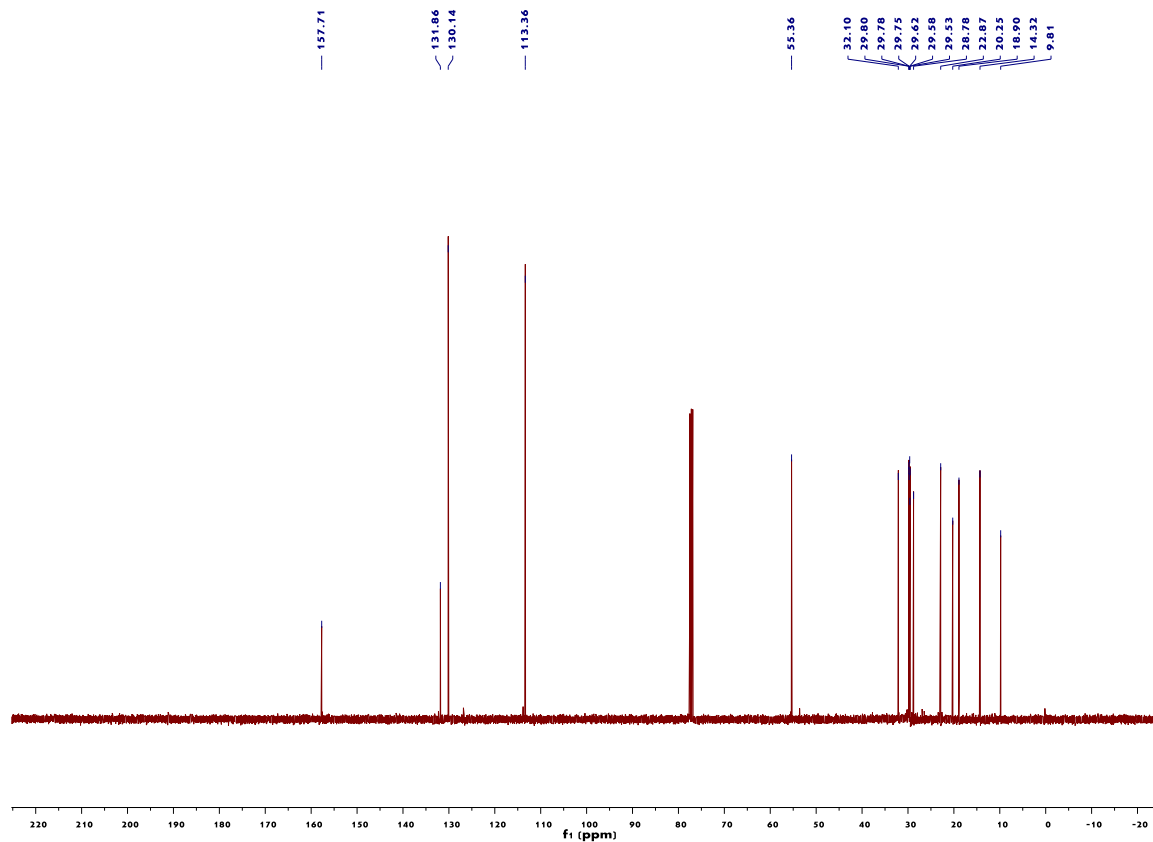

Supplementary Figure 97.  $^{13}\text{C}$  NMR (100 MHz,  $\text{CDCl}_3$ ) spectrum for 1ay

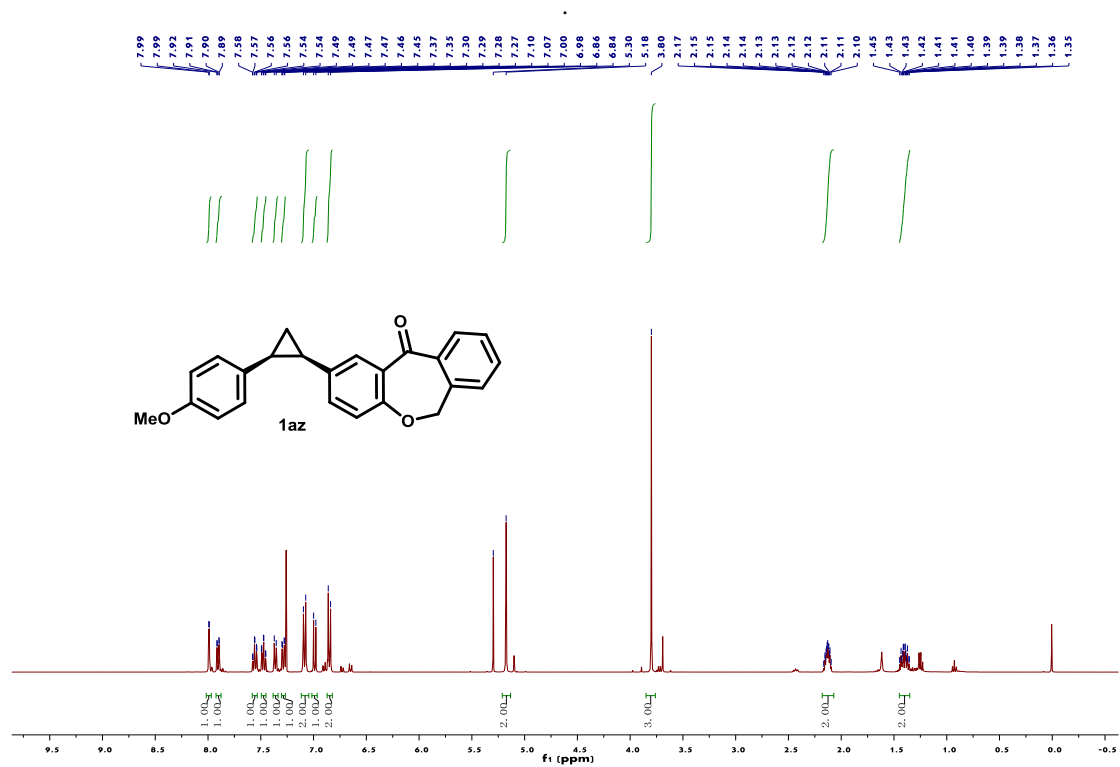

Supplementary Figure 98. <sup>1</sup>H NMR (400 MHz, CDCl<sub>3</sub>) spectrum for 1az

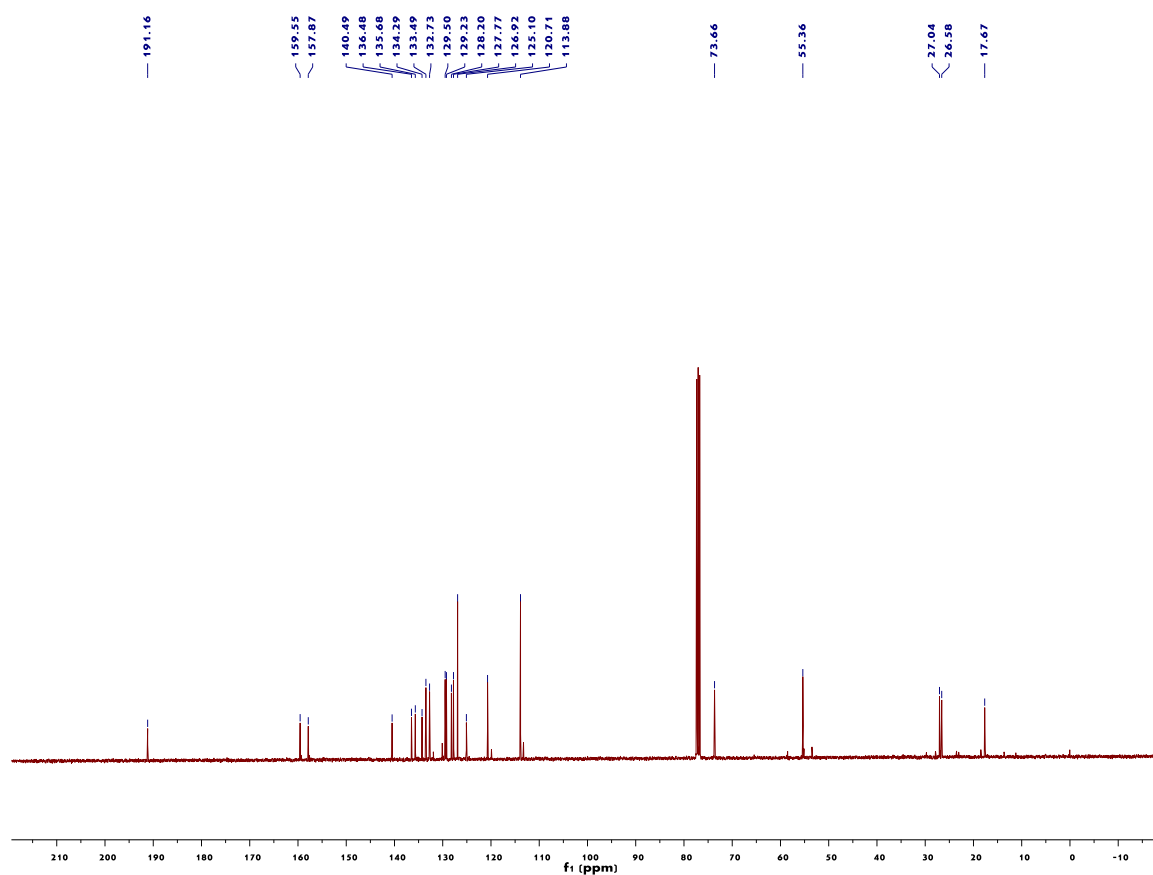

Supplementary Figure 99. <sup>13</sup>C NMR (100 MHz, CDCl<sub>3</sub>) spectrum for 1az

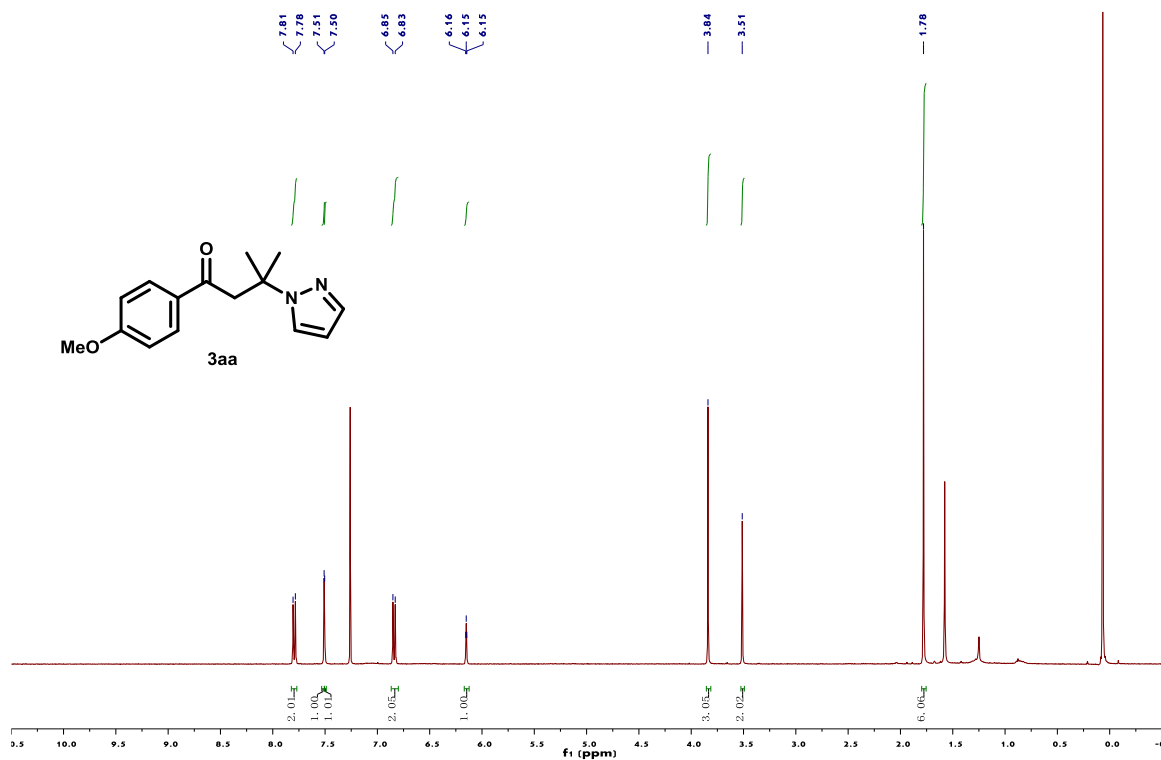

Supplementary Figure 100.  $^1\text{H}$  NMR (400 MHz,  $\text{CDCl}_3$ ) spectrum for 3aa

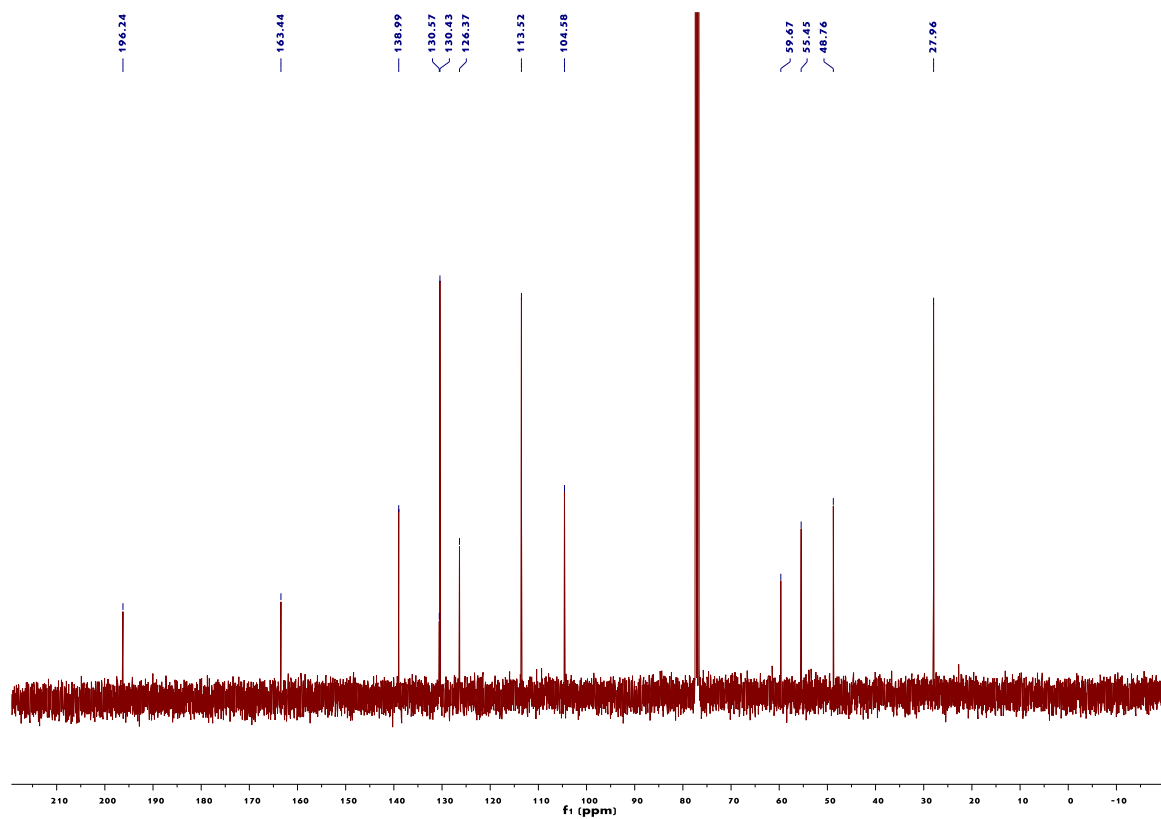

Supplementary Figure 101.  $^{13}\text{C}$  NMR (100 MHz,  $\text{CDCl}_3$ ) spectrum for 3aa

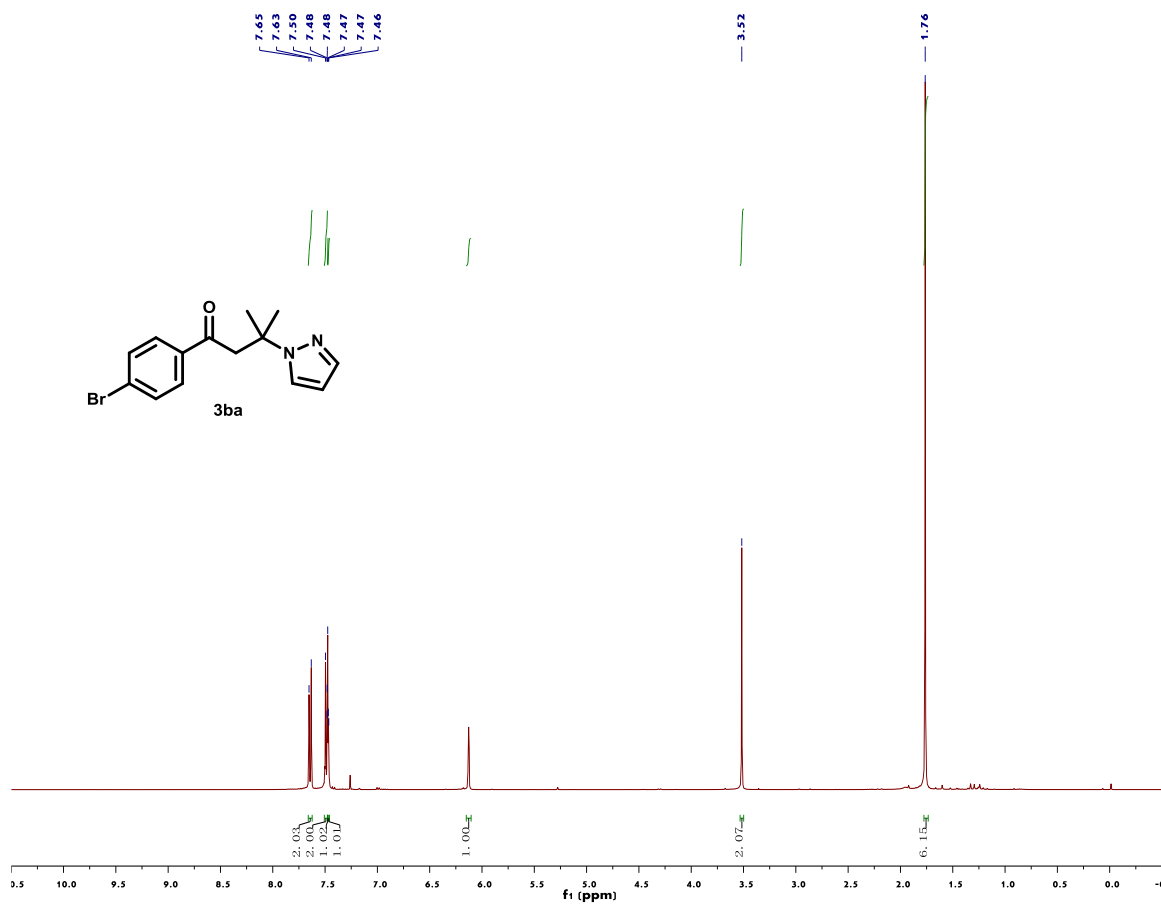

Supplementary Figure 102. <sup>1</sup>H NMR (400 MHz, CDCl<sub>3</sub>) spectrum for 3ba

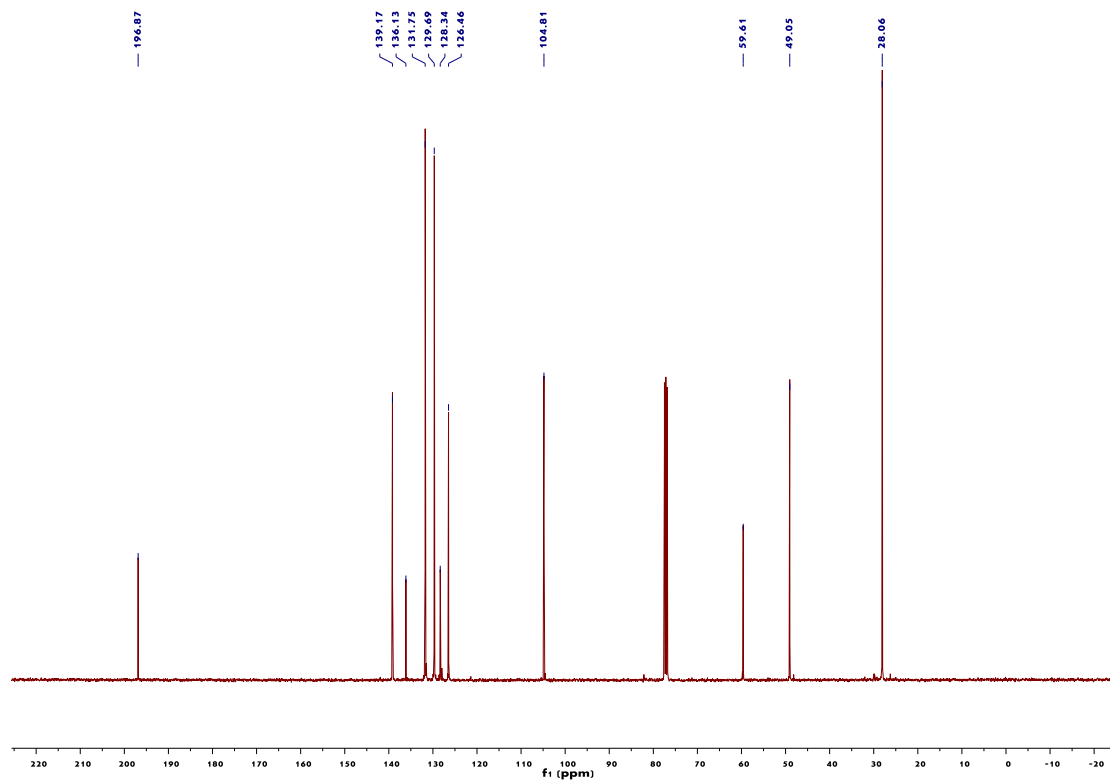

Supplementary Figure 103. <sup>13</sup>C NMR (100 MHz, CDCl<sub>3</sub>) spectrum for 3ba

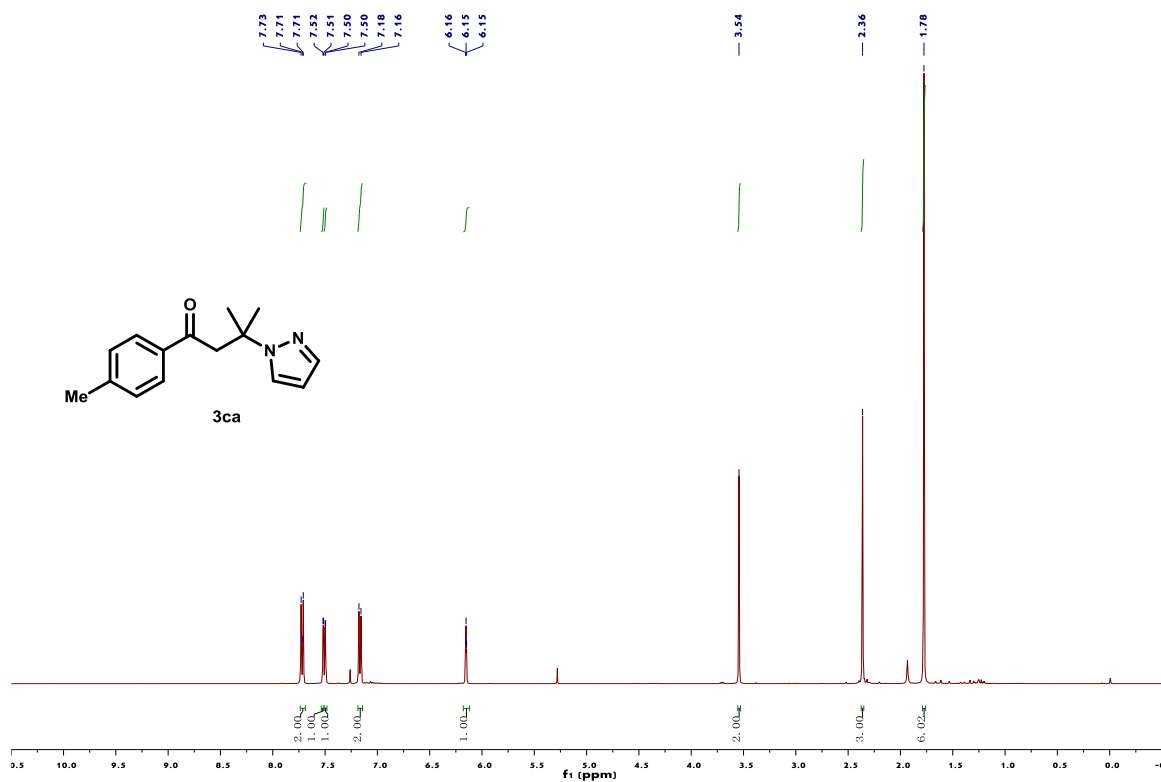

Supplementary Figure 104. <sup>1</sup>H NMR (400 MHz, CDCl<sub>3</sub>) spectrum for 3ca

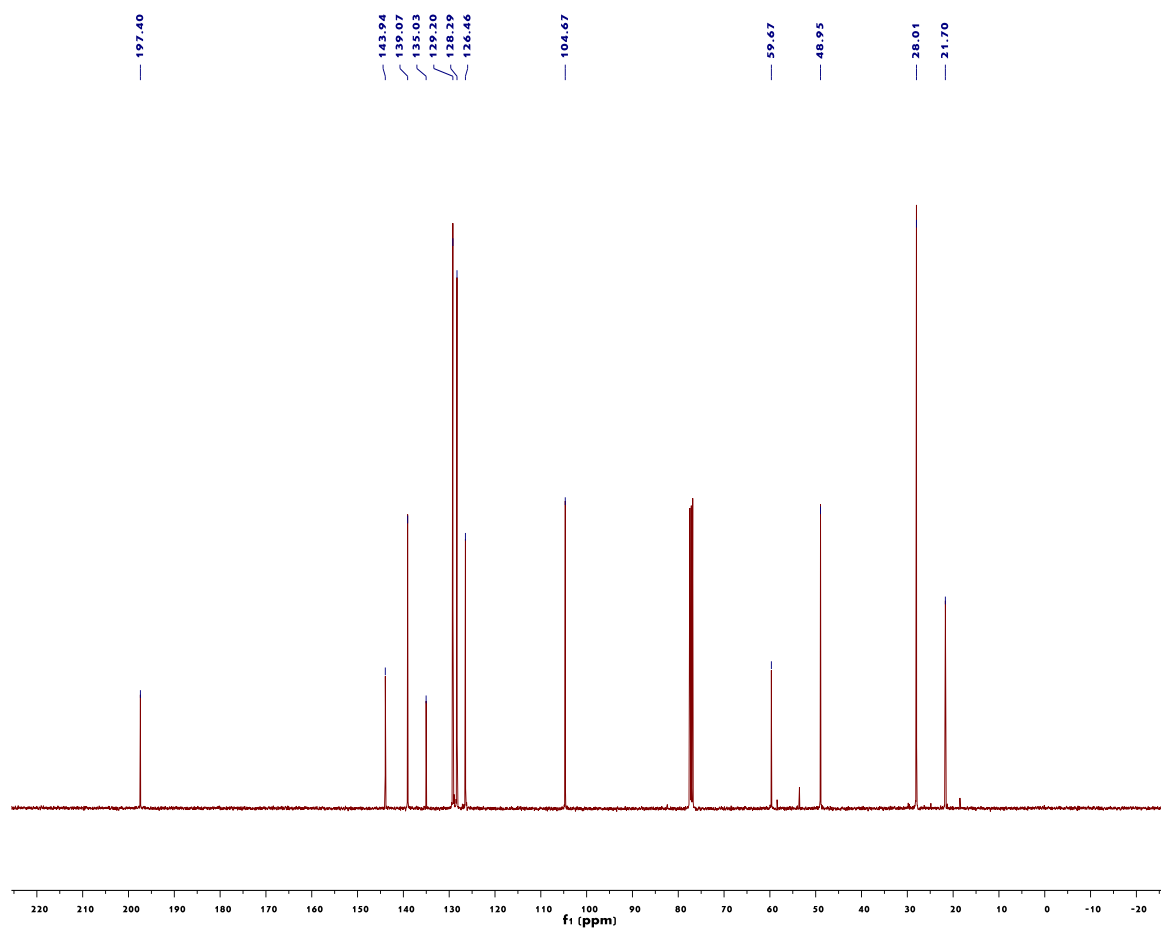

Supplementary Figure 105. <sup>13</sup>C NMR (100 MHz, CDCl<sub>3</sub>) spectrum for 3ca

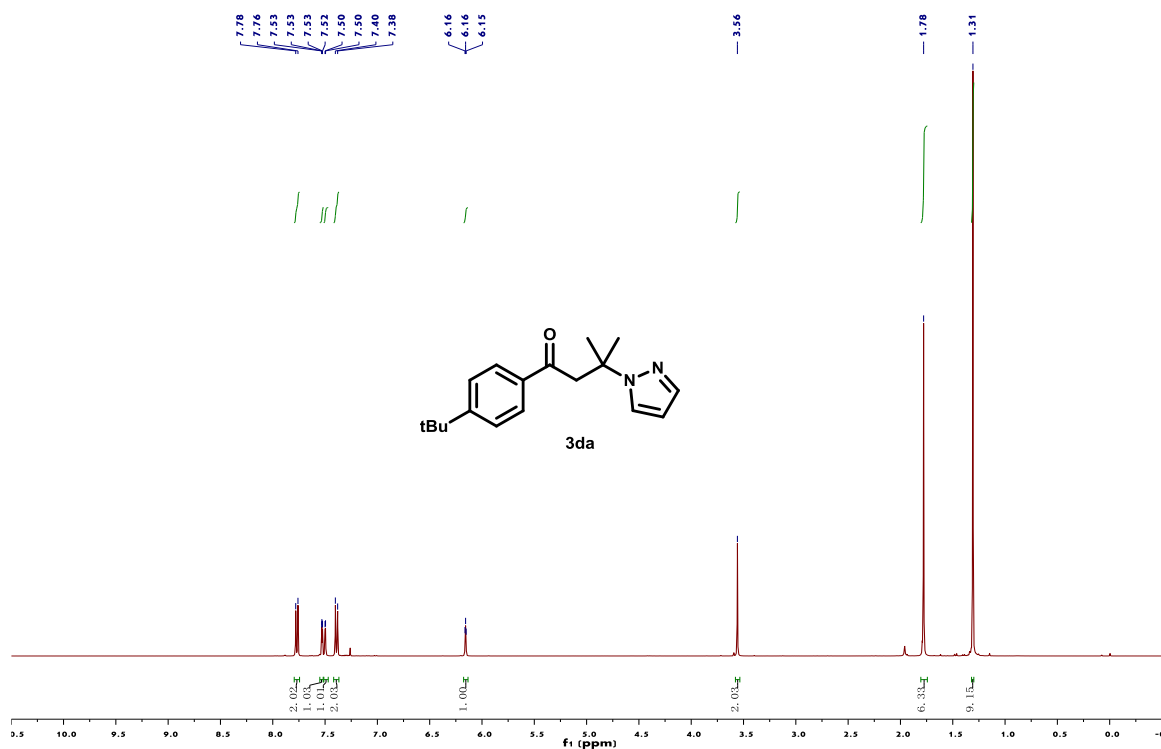

Supplementary Figure 106.  $^1\text{H}$  NMR (400 MHz,  $\text{CDCl}_3$ ) spectrum for 3da

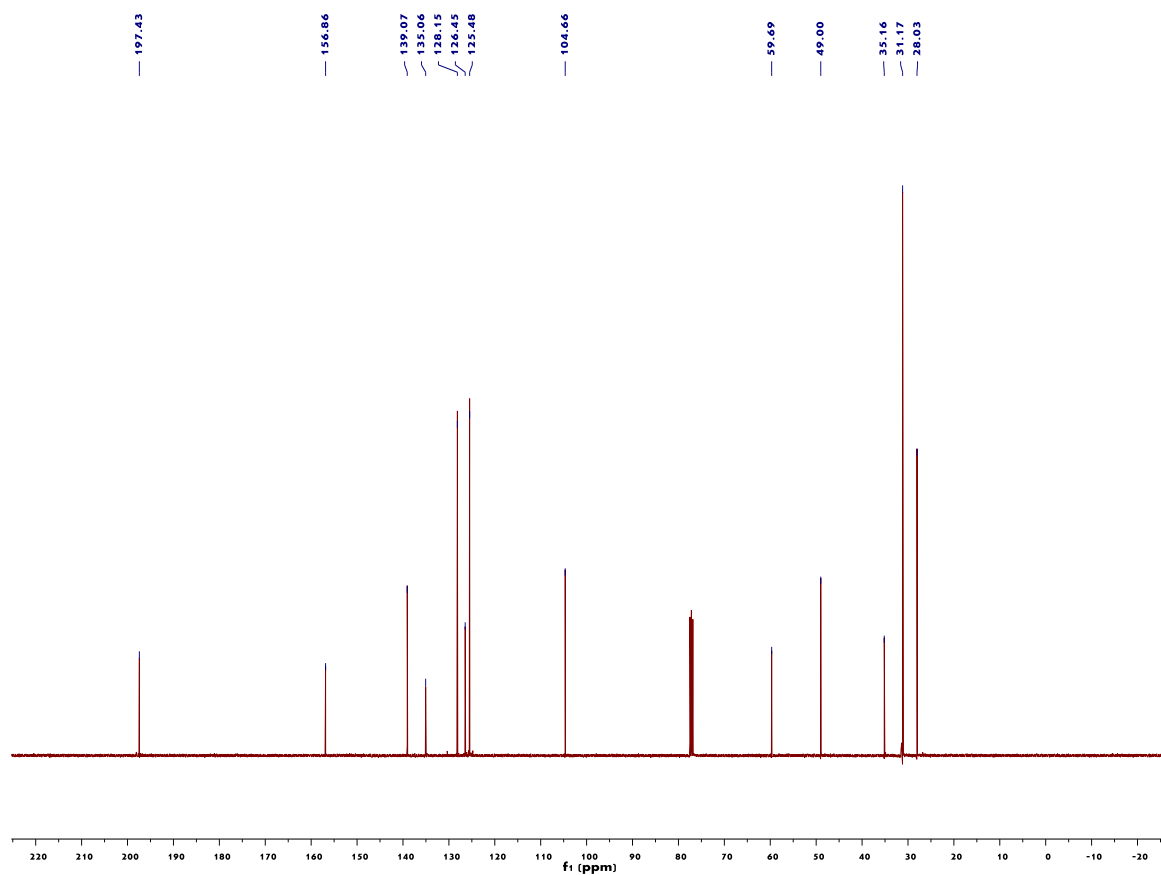

Supplementary Figure 107.  $^{13}\text{C}$  NMR (100 MHz,  $\text{CDCl}_3$ ) spectrum for 3da

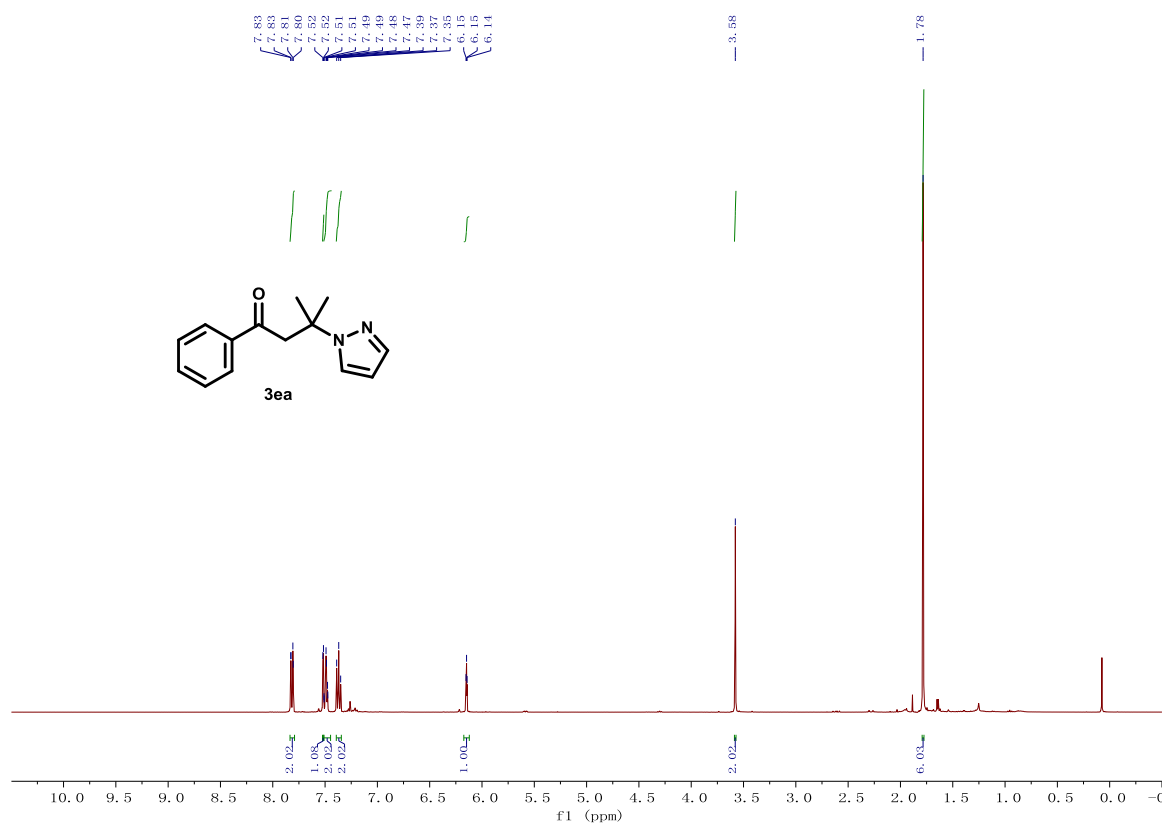

Supplementary Figure 108.  $^1\text{H}$  NMR (400 MHz,  $\text{CDCl}_3$ ) spectrum for 3ea

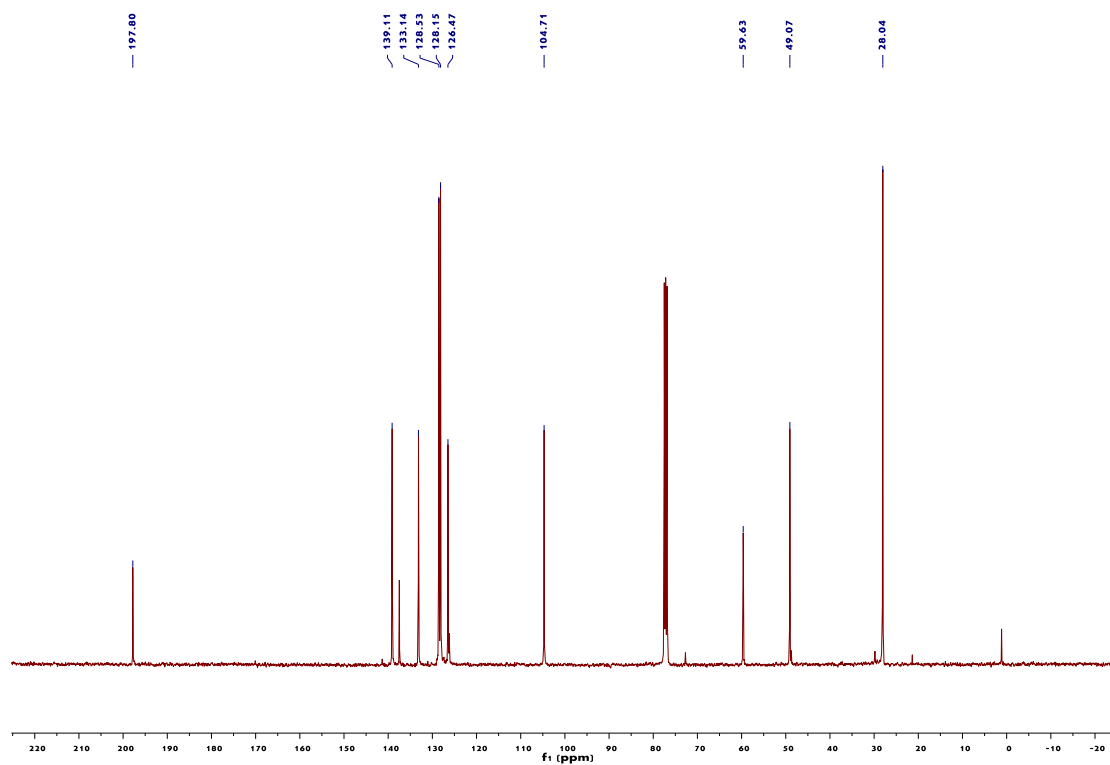

Supplementary Figure 109.  $^{13}\text{C}$  NMR (100 MHz,  $\text{CDCl}_3$ ) spectrum for 3ea



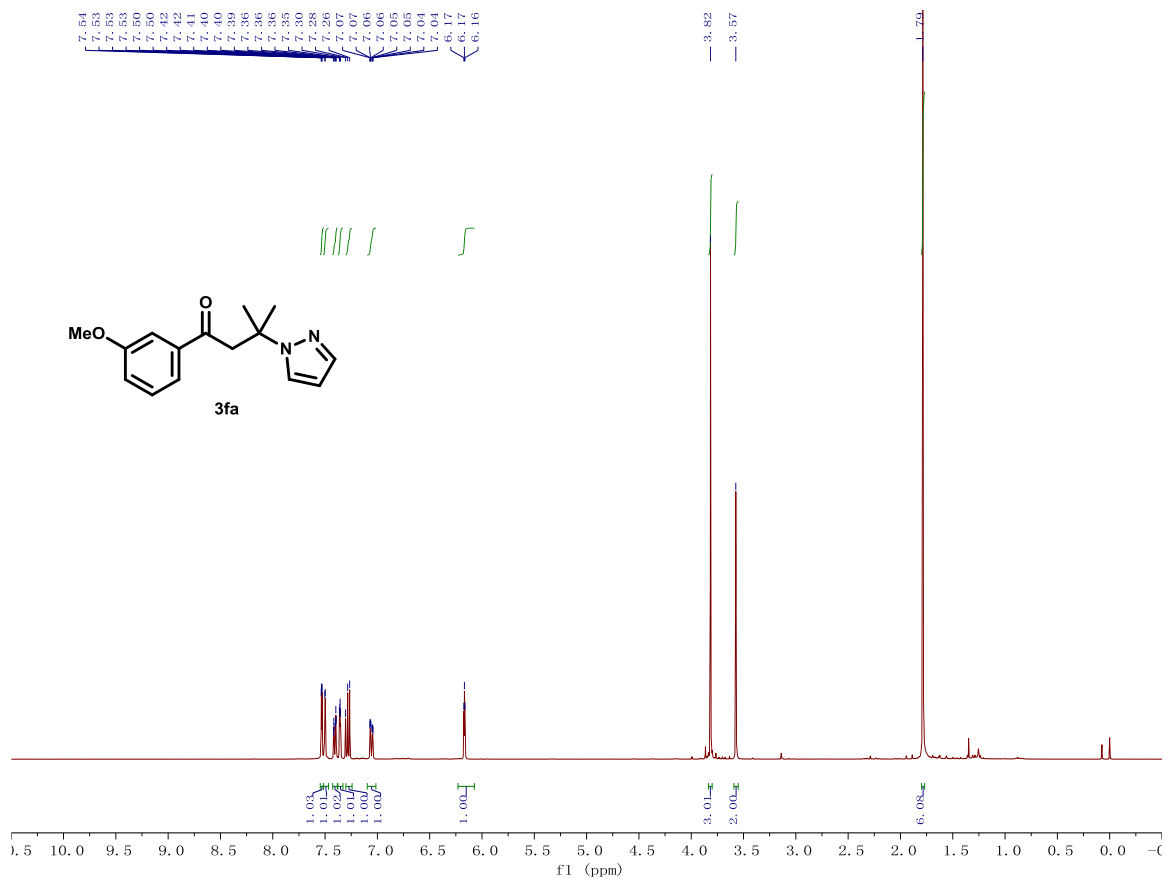

Supplementary Figure 110. <sup>1</sup>H NMR (400 MHz, CDCl<sub>3</sub>) spectrum for 3fa

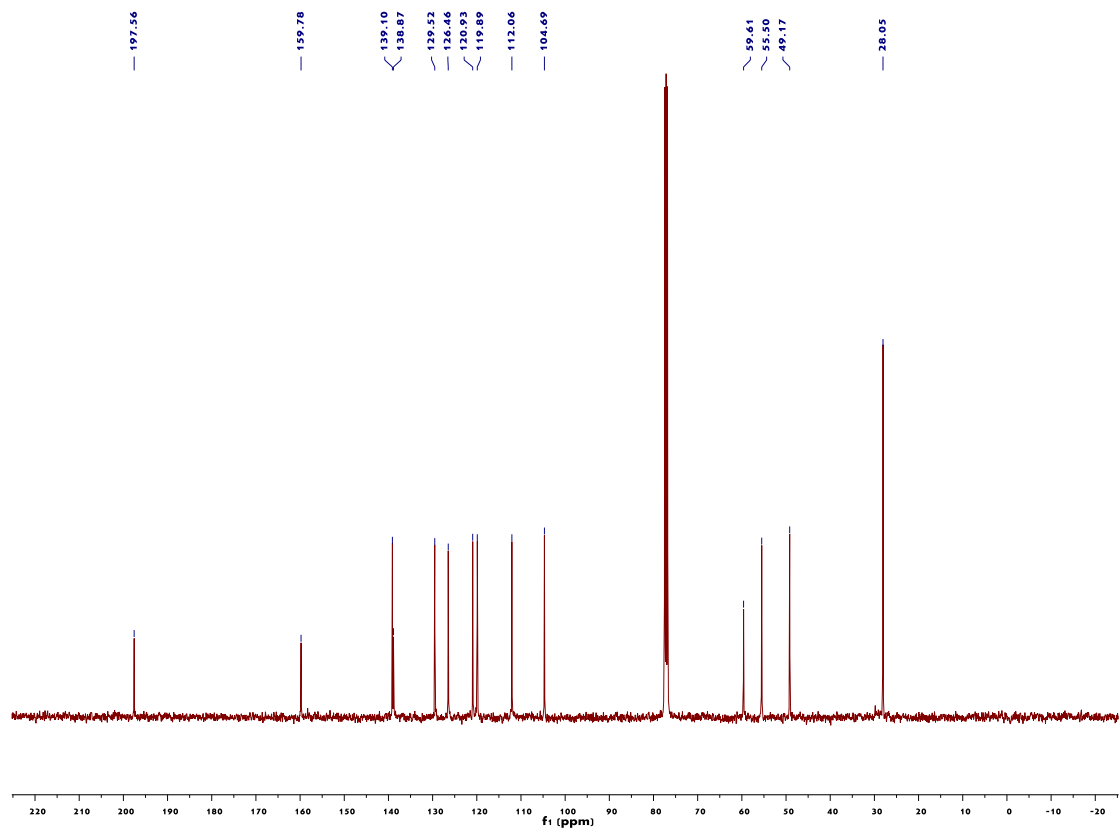

Supplementary Figure 111. <sup>13</sup>C NMR (100 MHz, CDCl<sub>3</sub>) spectrum for 3fa

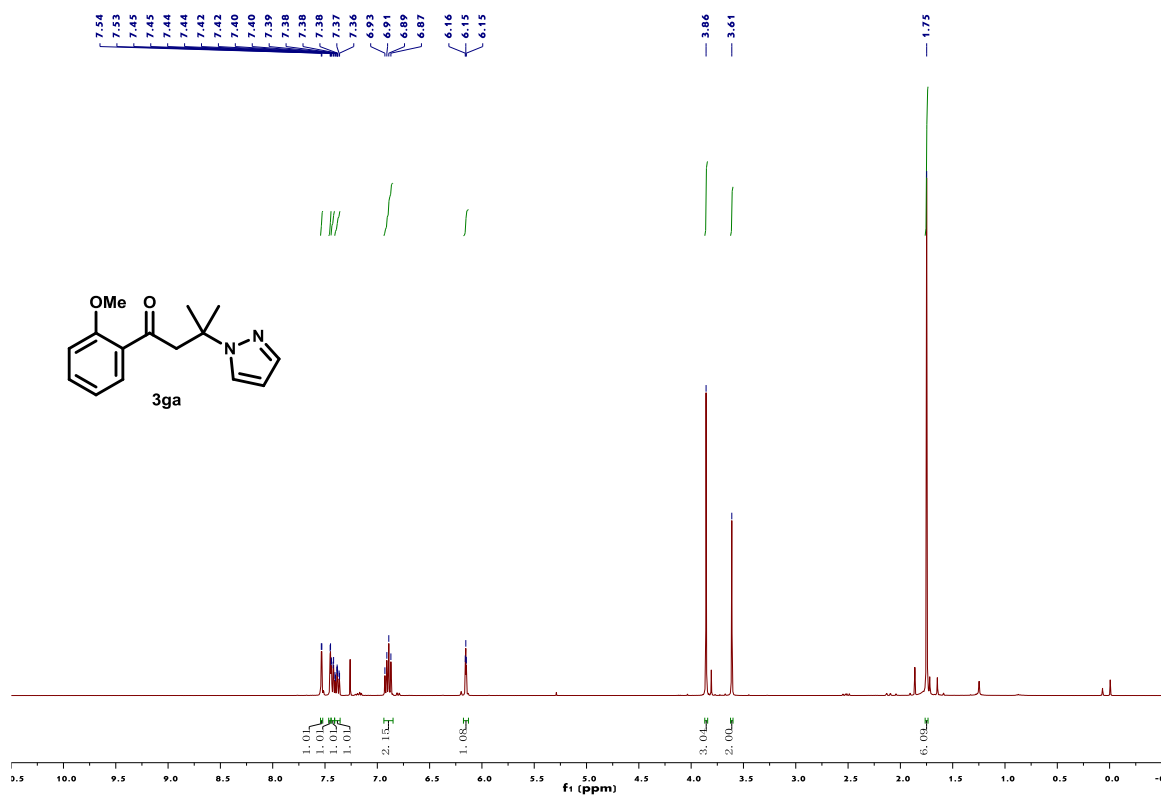

Supplementary Figure 112.  $^1\text{H}$  NMR (400 MHz,  $\text{CDCl}_3$ ) spectrum for 3ga

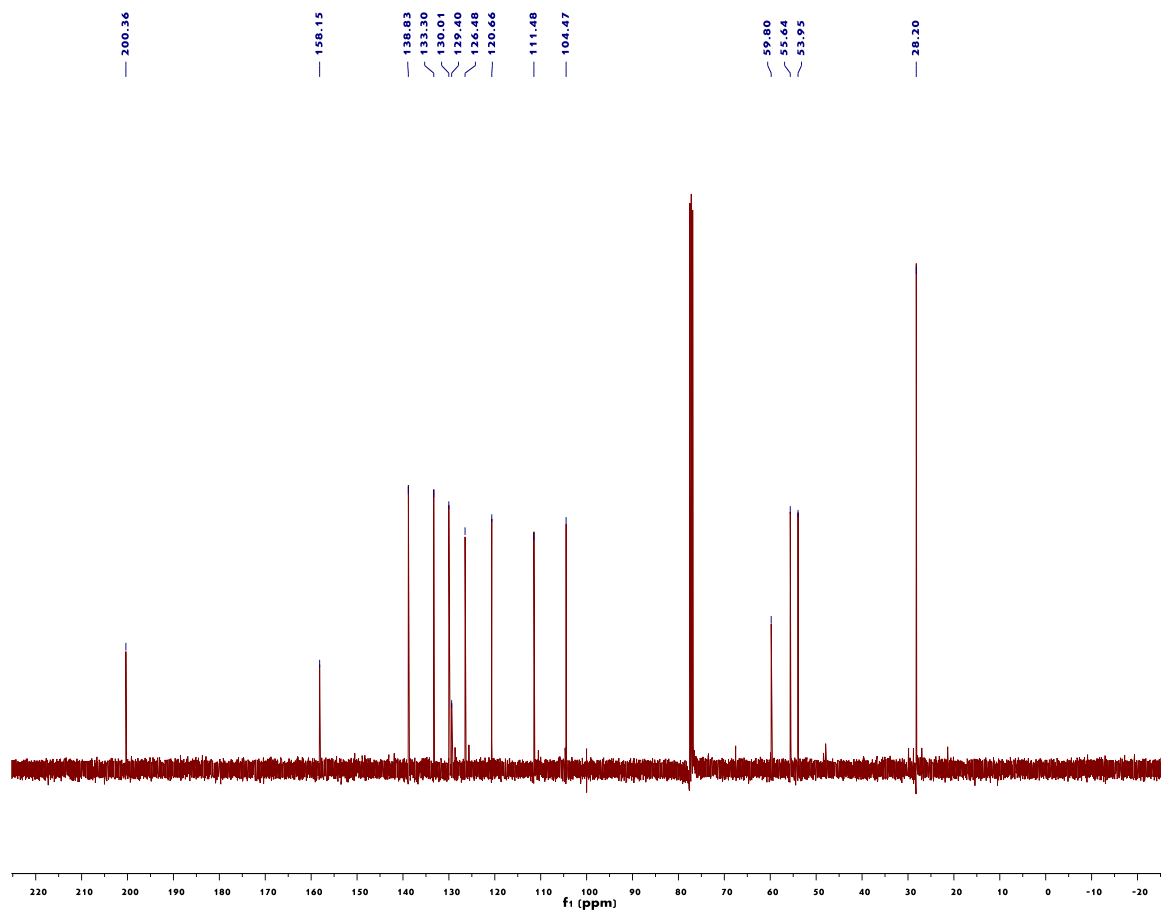

Supplementary Figure 113.  $^{13}\text{C}$  NMR (100 MHz,  $\text{CDCl}_3$ ) spectrum for 3ga

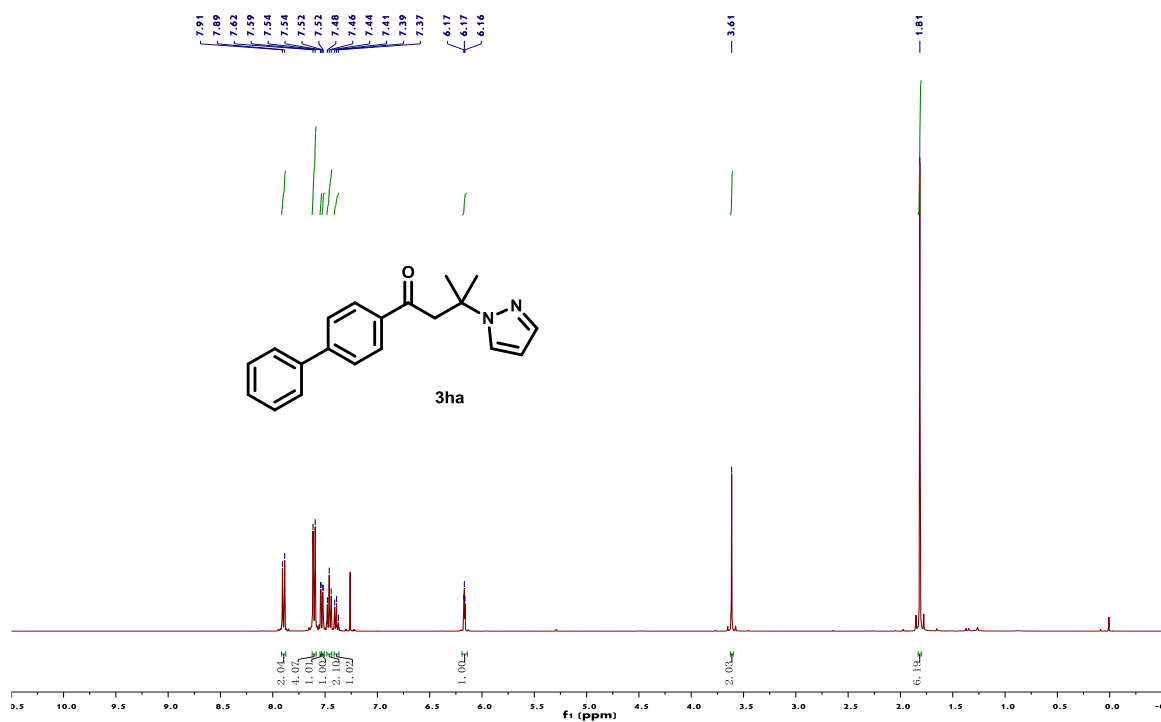

Supplementary Figure 114. <sup>1</sup>H NMR (400 MHz, CDCl<sub>3</sub>) spectrum for 3ha

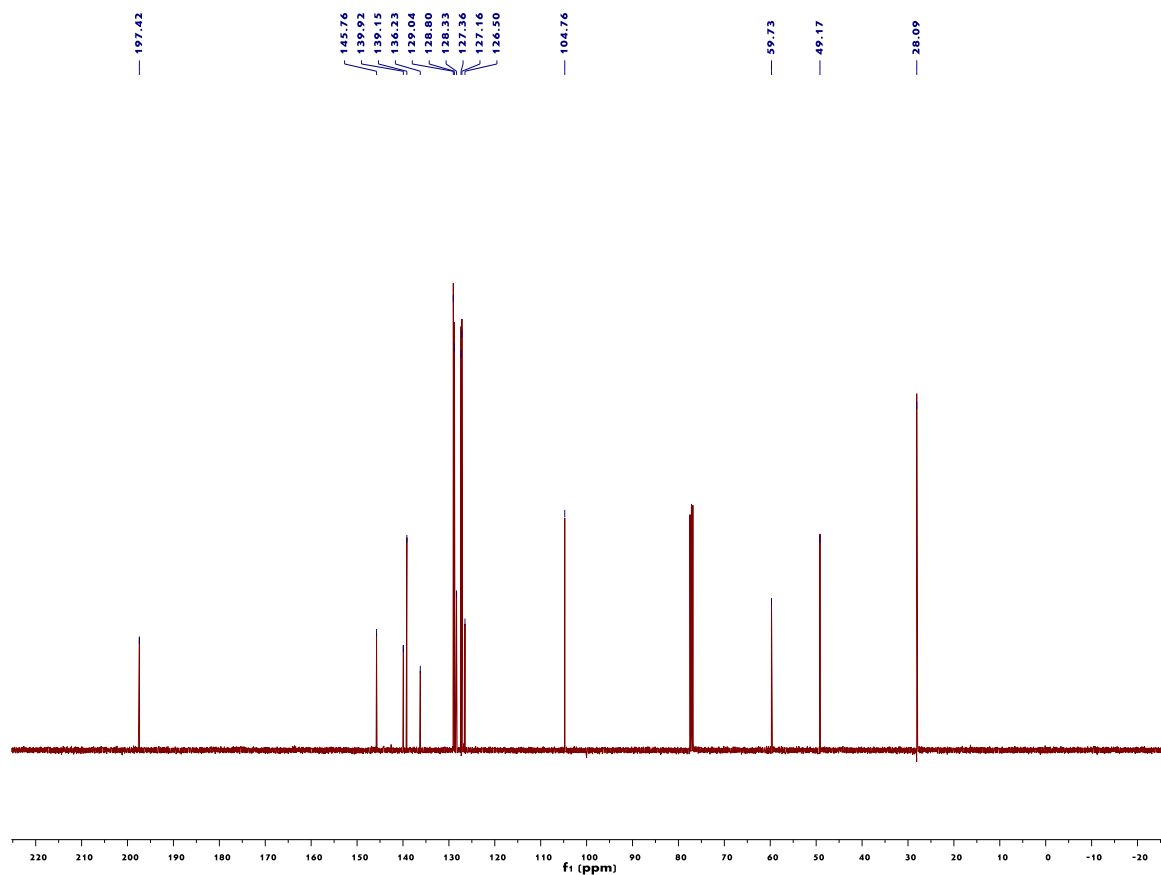

Supplementary Figure 115. <sup>13</sup>C NMR (100 MHz, CDCl<sub>3</sub>) spectrum for 3ha

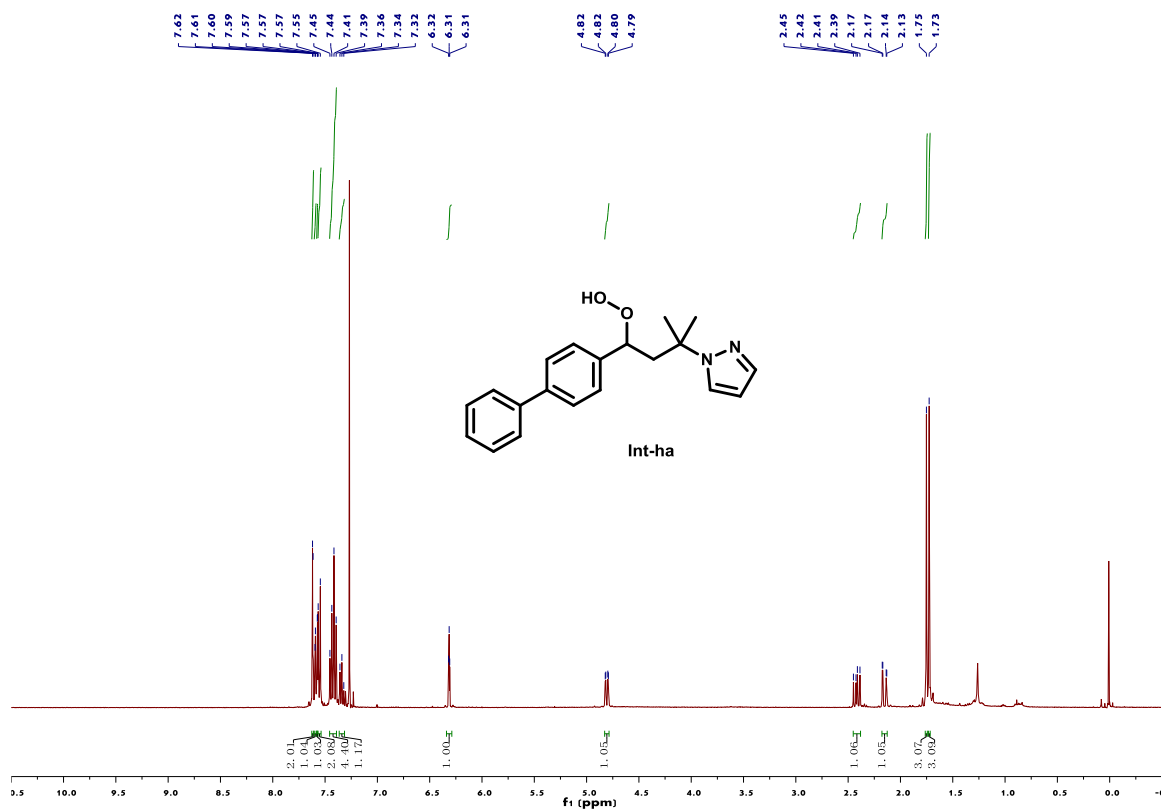

Supplementary Figure 116. <sup>1</sup>H NMR (400 MHz, CDCl<sub>3</sub>) spectrum for Int-ha

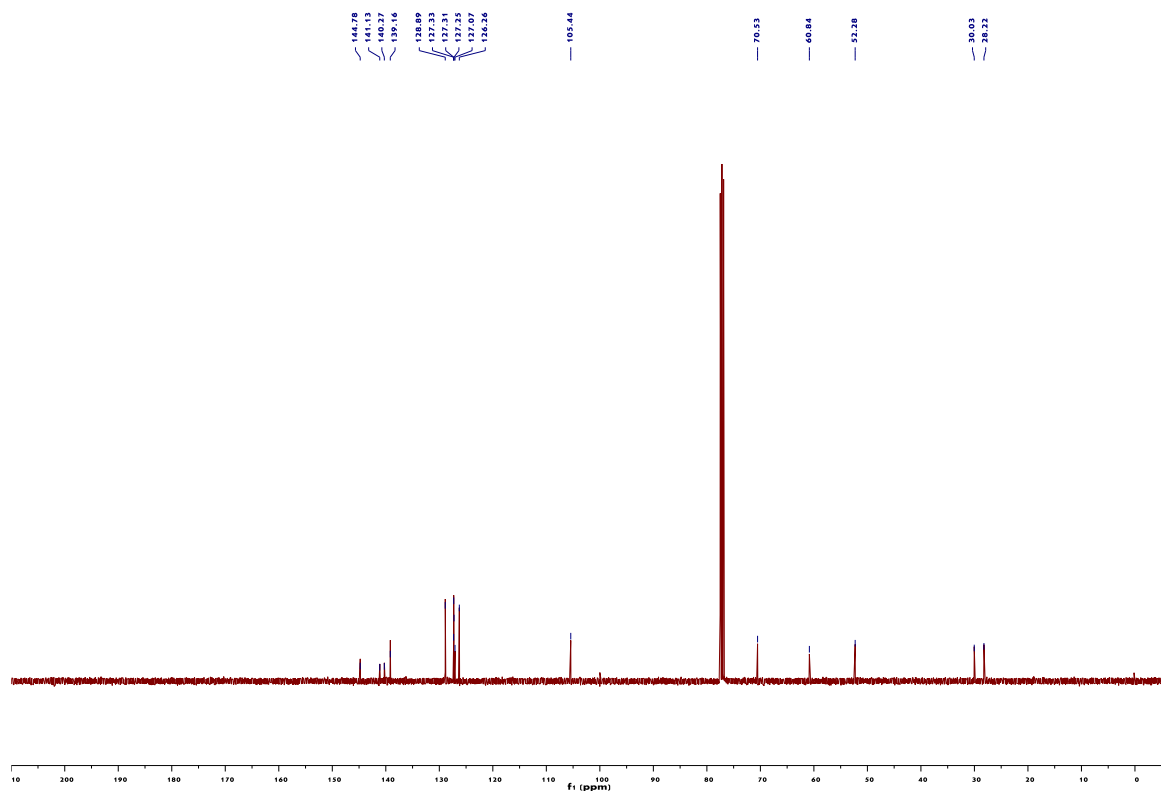

Supplementary Figure 117. <sup>13</sup>C NMR (100 MHz, CDCl<sub>3</sub>) spectrum for Int-ha

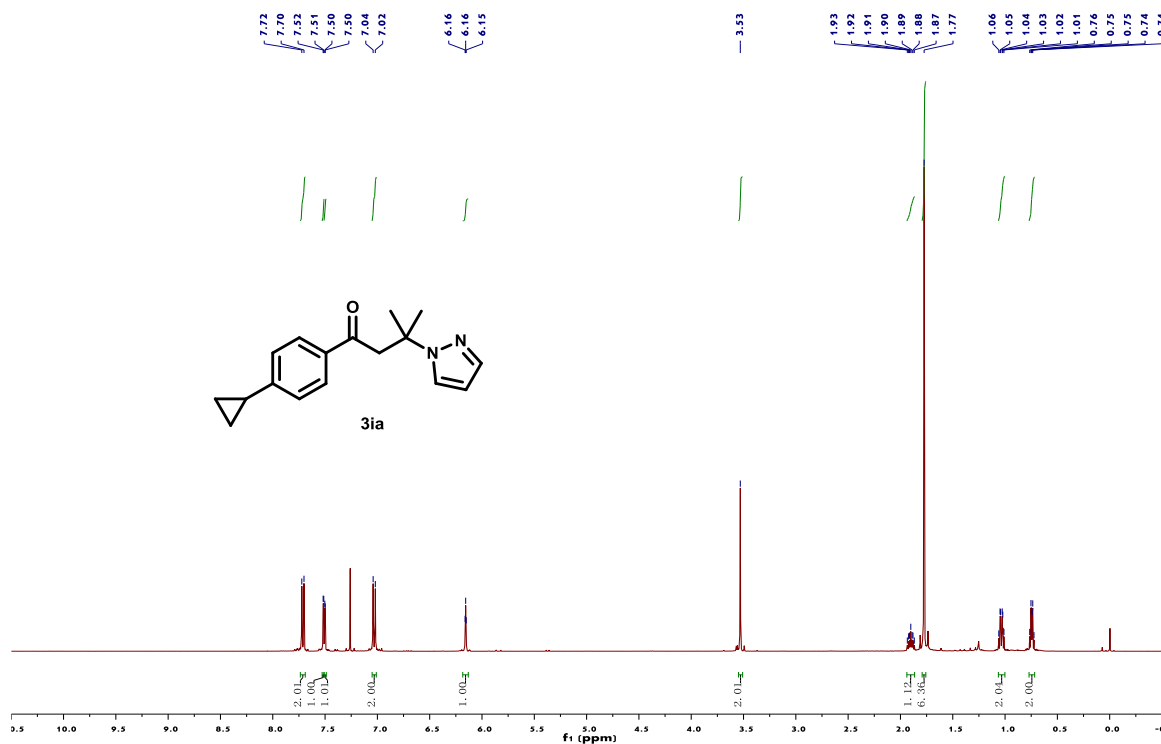

Supplementary Figure 118. <sup>1</sup>H NMR (400 MHz, CDCl<sub>3</sub>) spectrum for 3ia

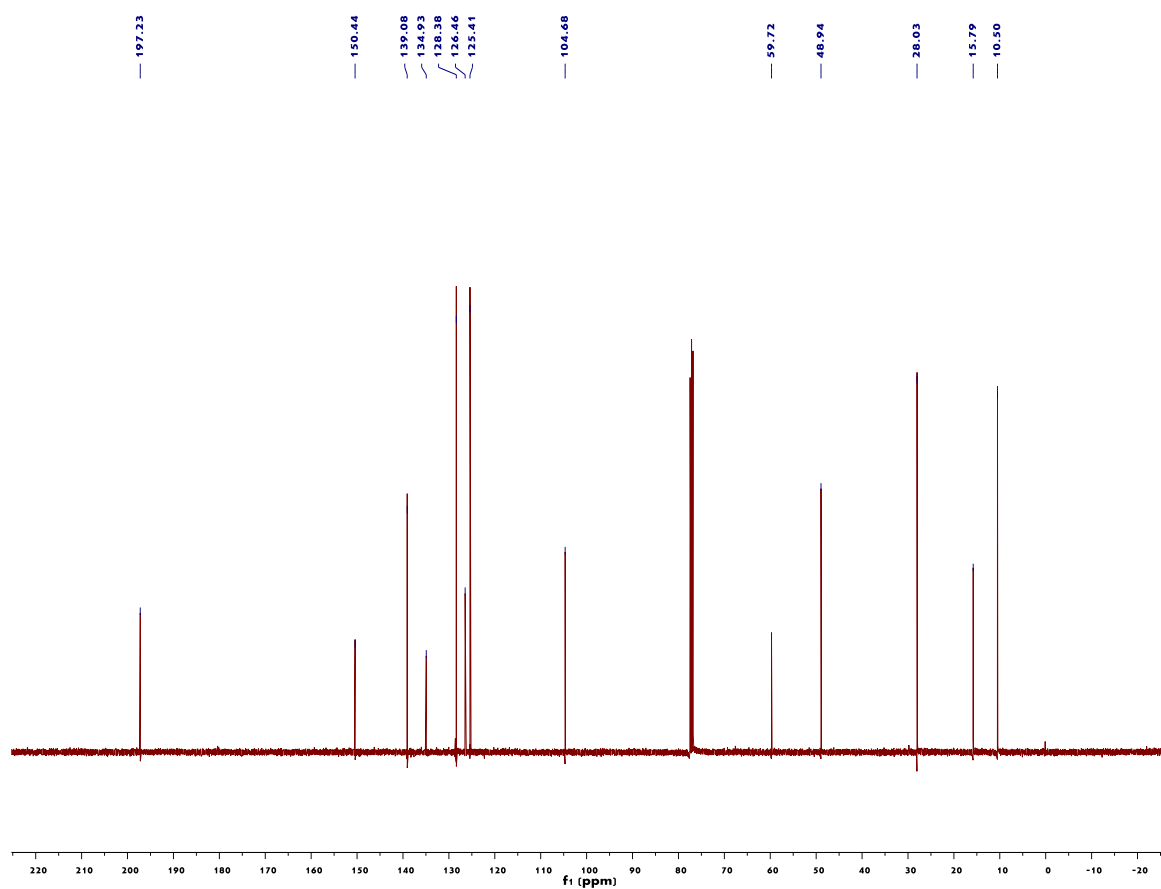

Supplementary Figure 119. <sup>13</sup>C NMR (100 MHz, CDCl<sub>3</sub>) spectrum for 3ia

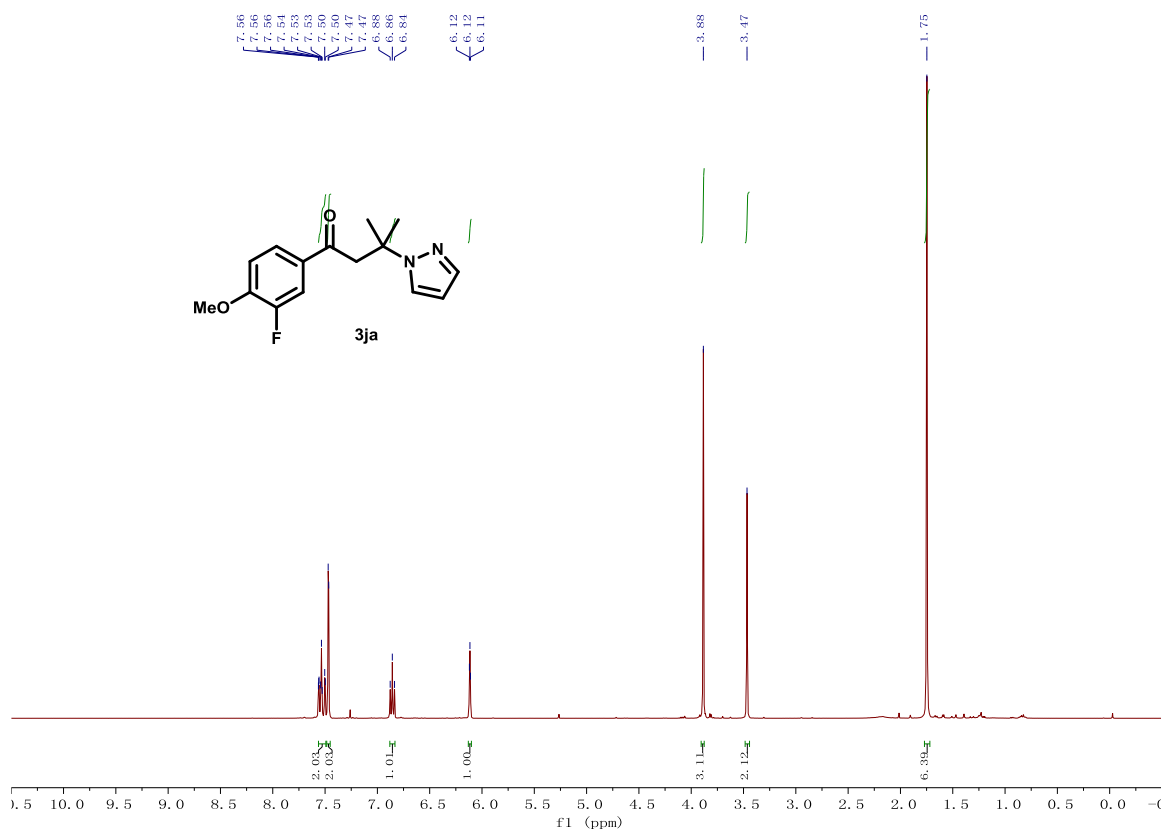

Supplementary Figure 120. <sup>1</sup>H NMR (400 MHz, CDCl<sub>3</sub>) spectrum for 3ja

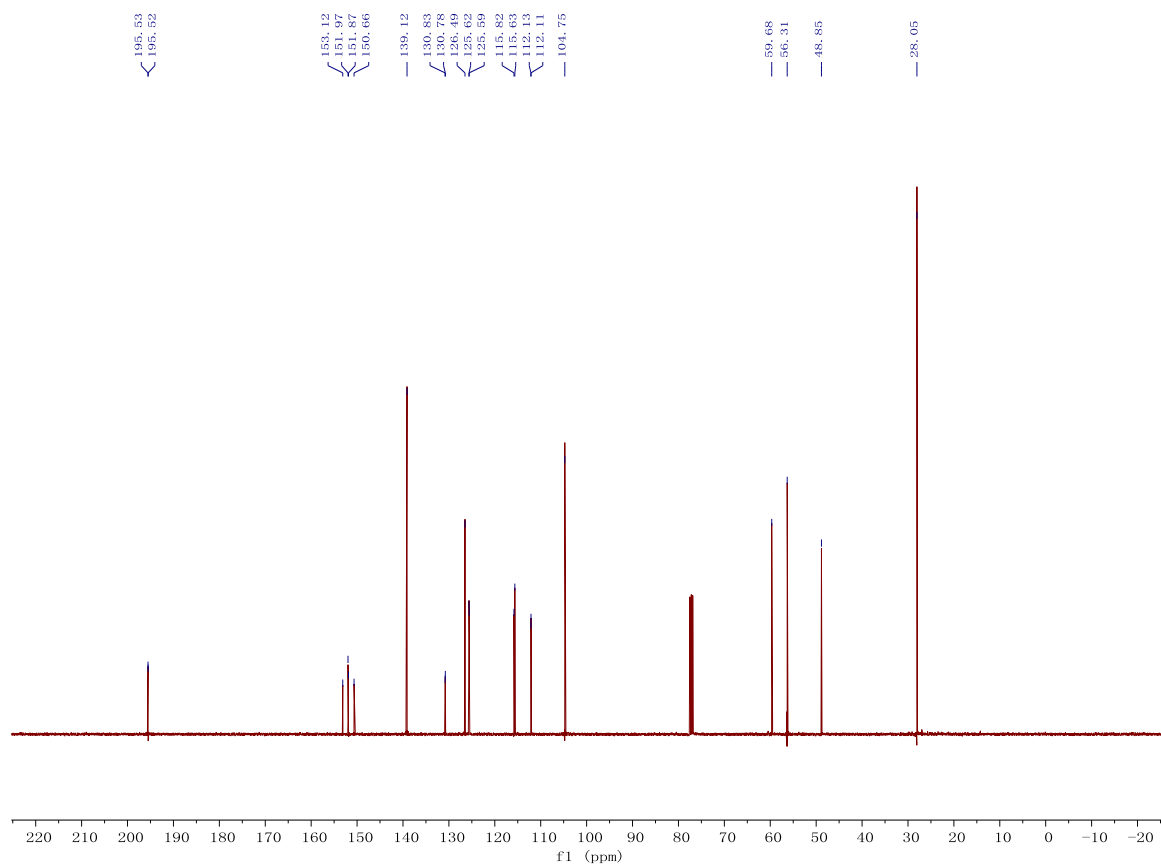

Supplementary Figure 121. <sup>13</sup>C NMR (100 MHz, CDCl<sub>3</sub>) spectrum for 3ja

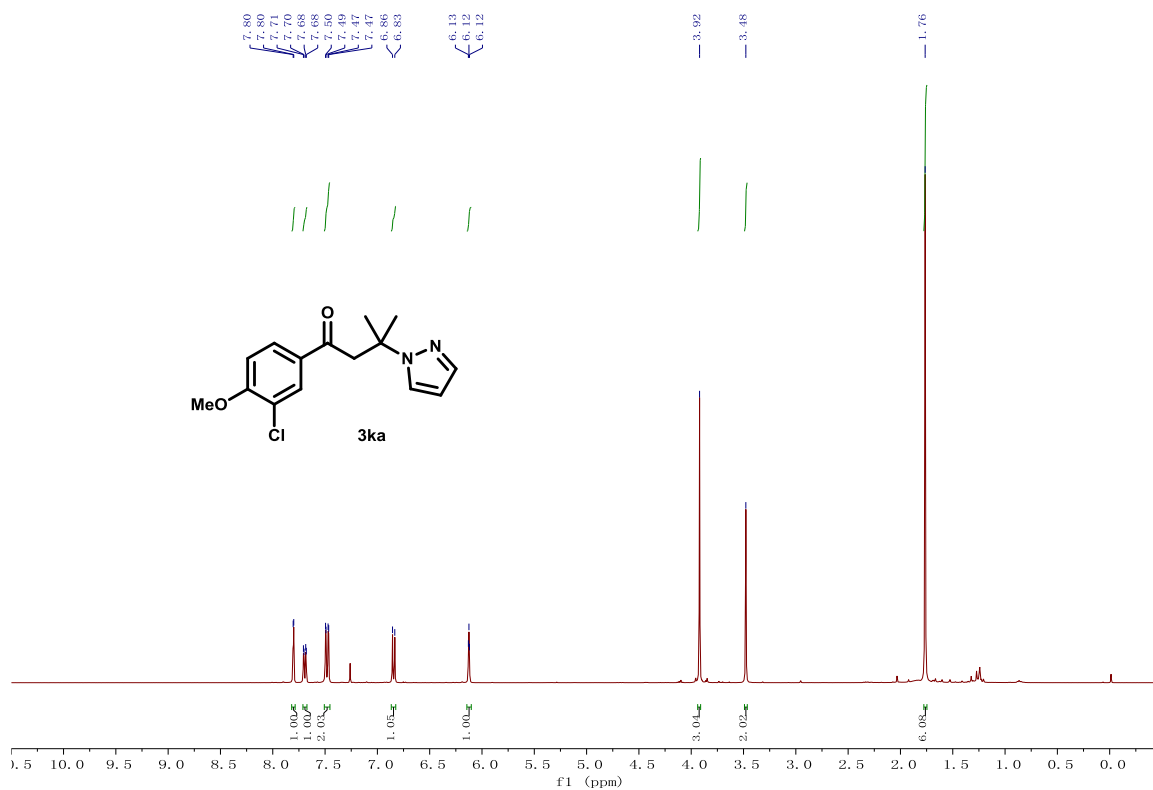

Supplementary Figure 122. <sup>1</sup>H NMR (400 MHz, CDCl<sub>3</sub>) spectrum for 3ka

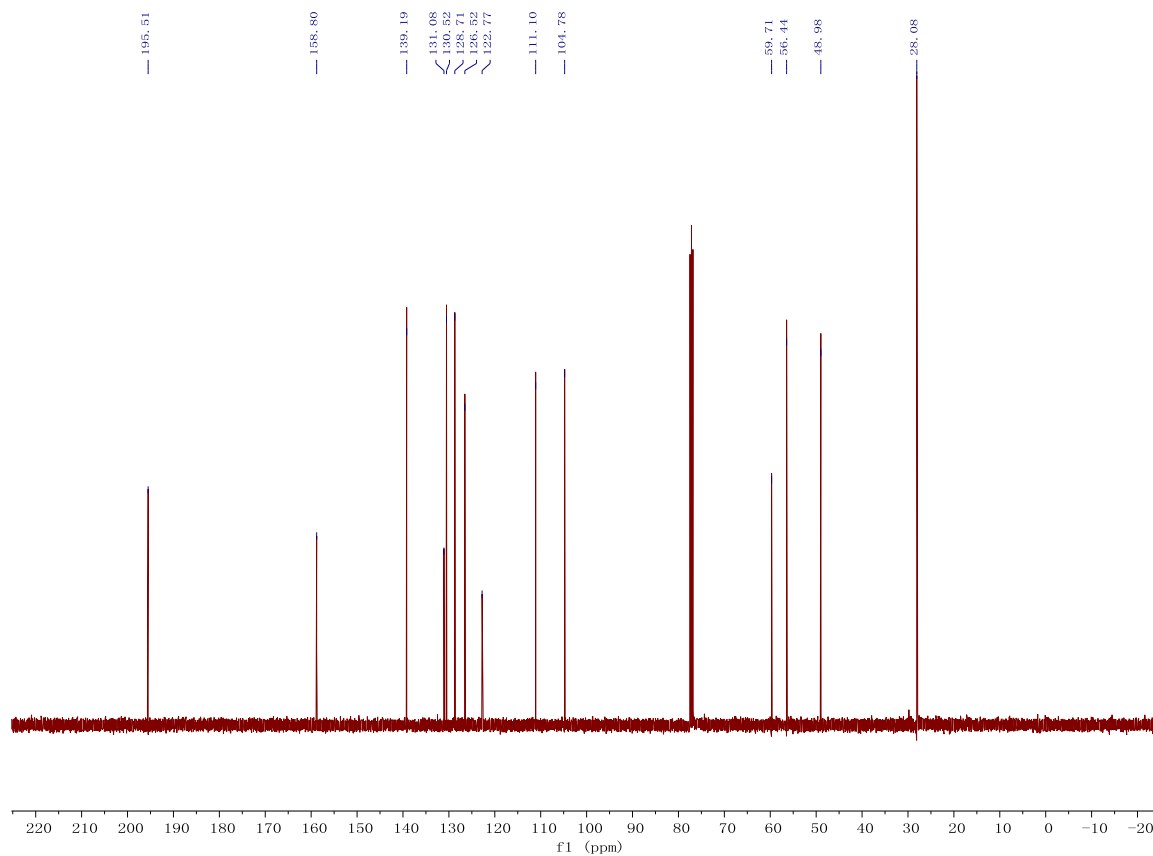

Supplementary Figure 123. <sup>13</sup>C NMR (100 MHz, CDCl<sub>3</sub>) spectrum for 3ka

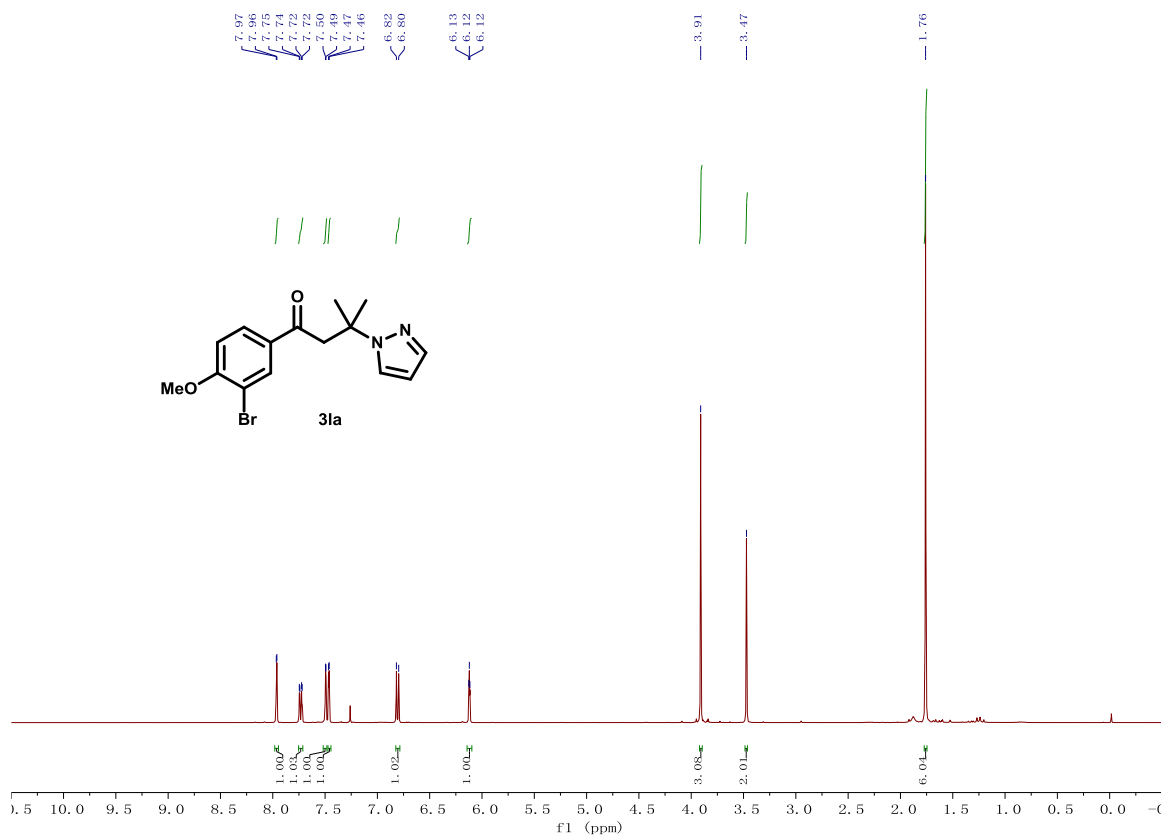

Supplementary Figure 124. <sup>1</sup>H NMR (400 MHz, CDCl<sub>3</sub>) spectrum for 3la

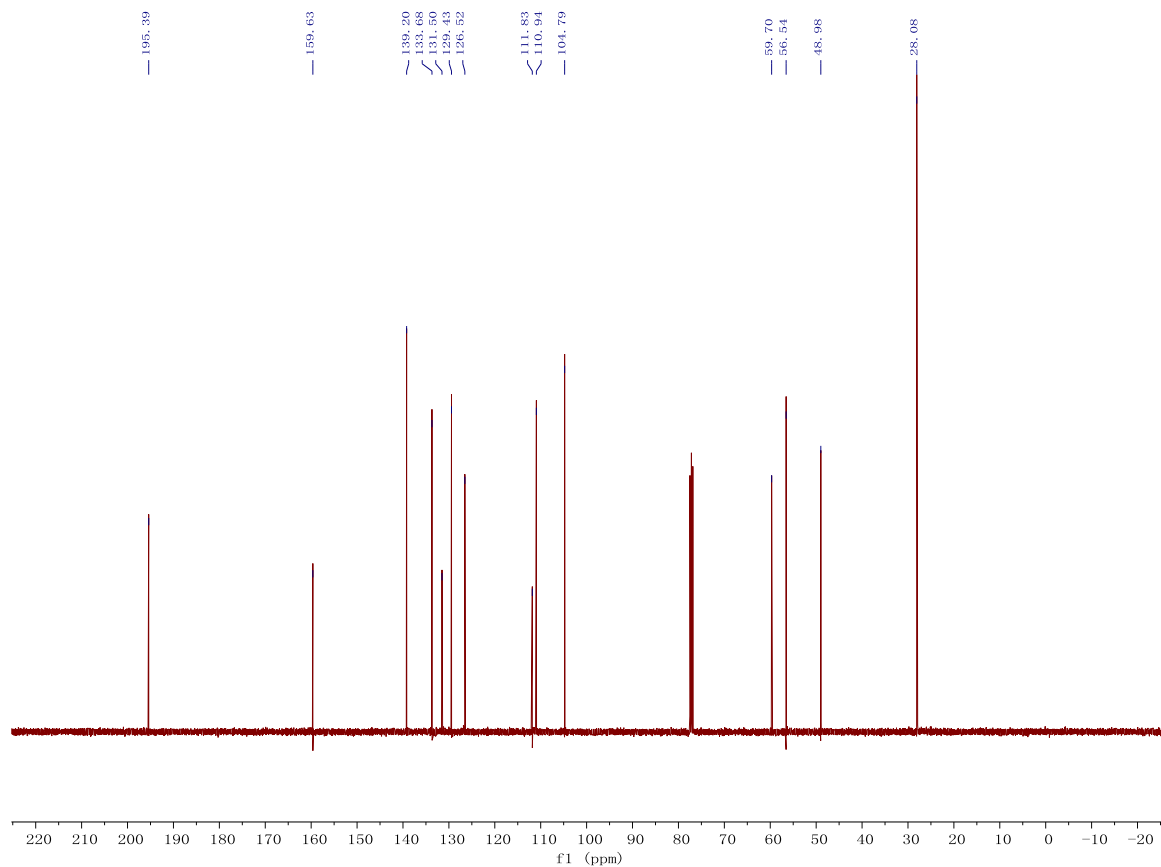

Supplementary Figure 125. <sup>13</sup>C NMR (100 MHz, CDCl<sub>3</sub>) spectrum for 3la



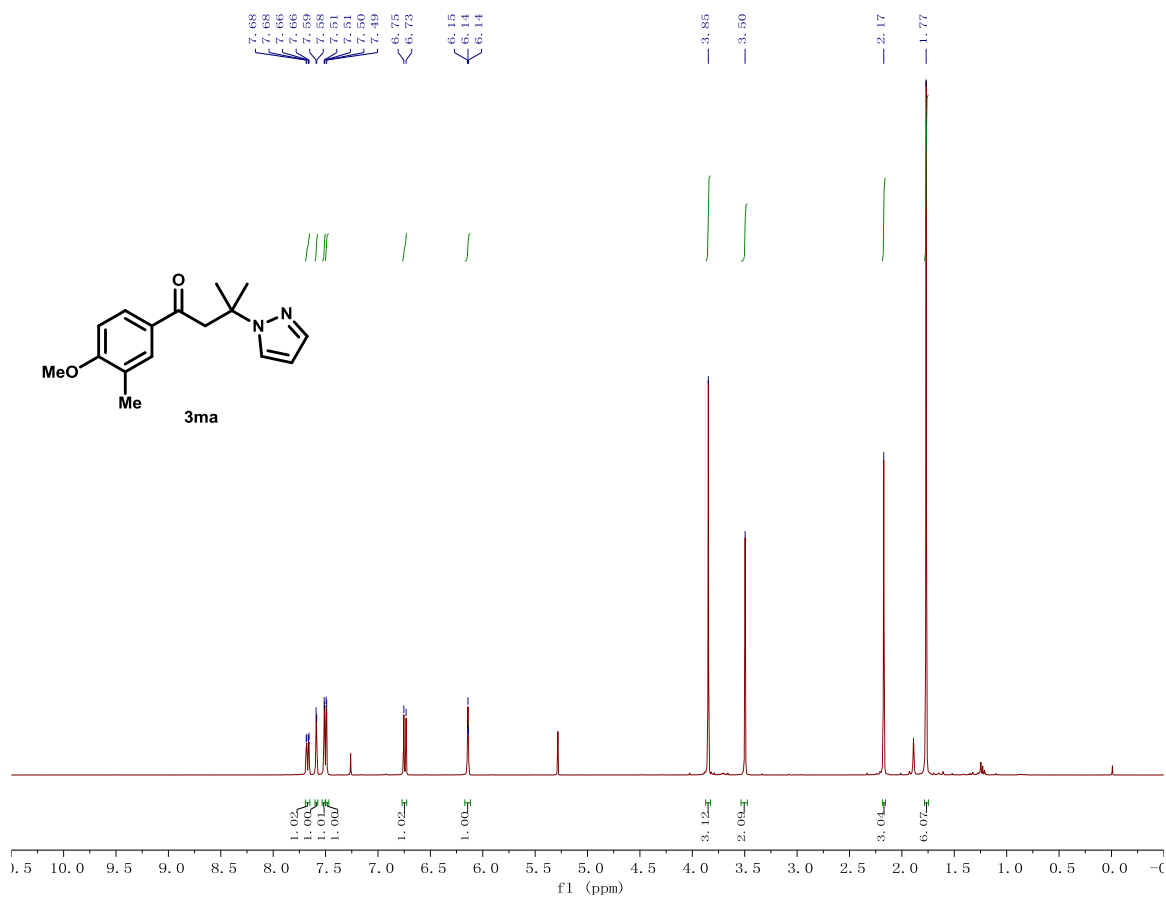

Supplementary Figure 126. <sup>1</sup>H NMR (400 MHz, CDCl<sub>3</sub>) spectrum for 3ma

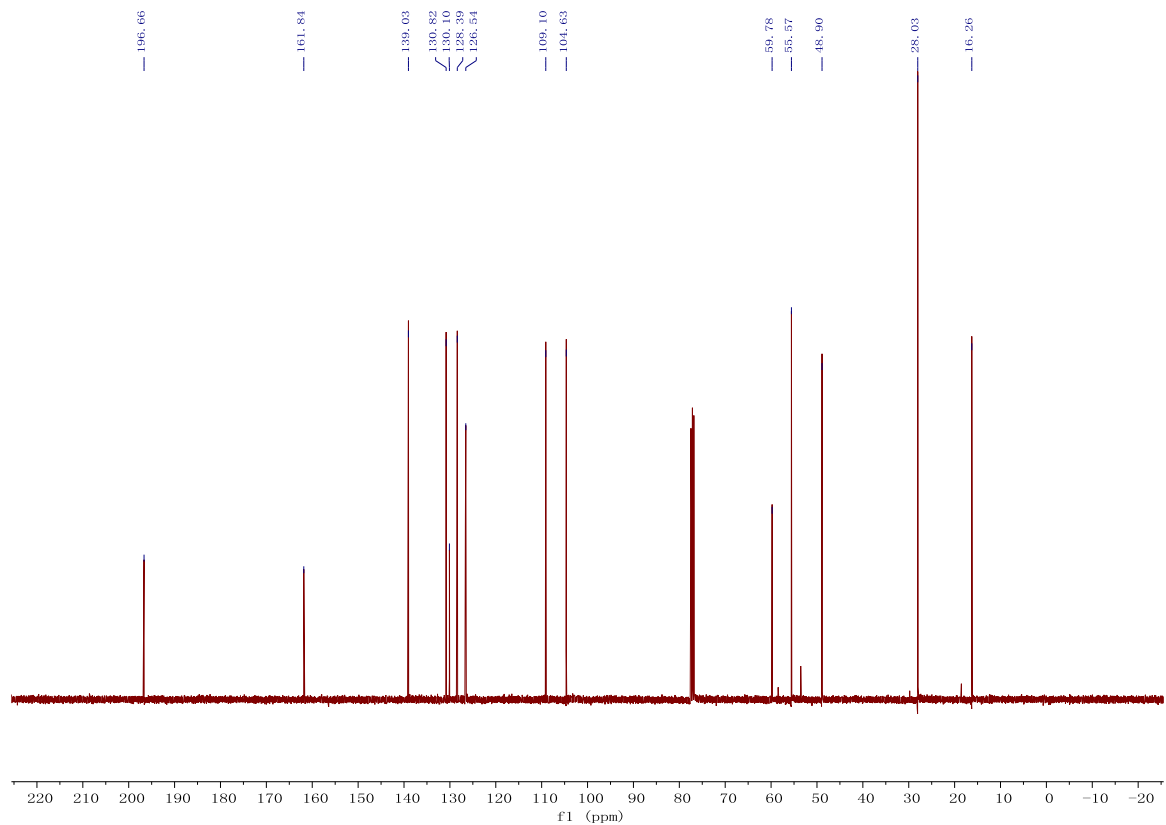

Supplementary Figure 127. <sup>13</sup>C NMR (100 MHz, CDCl<sub>3</sub>) spectrum for 3ma

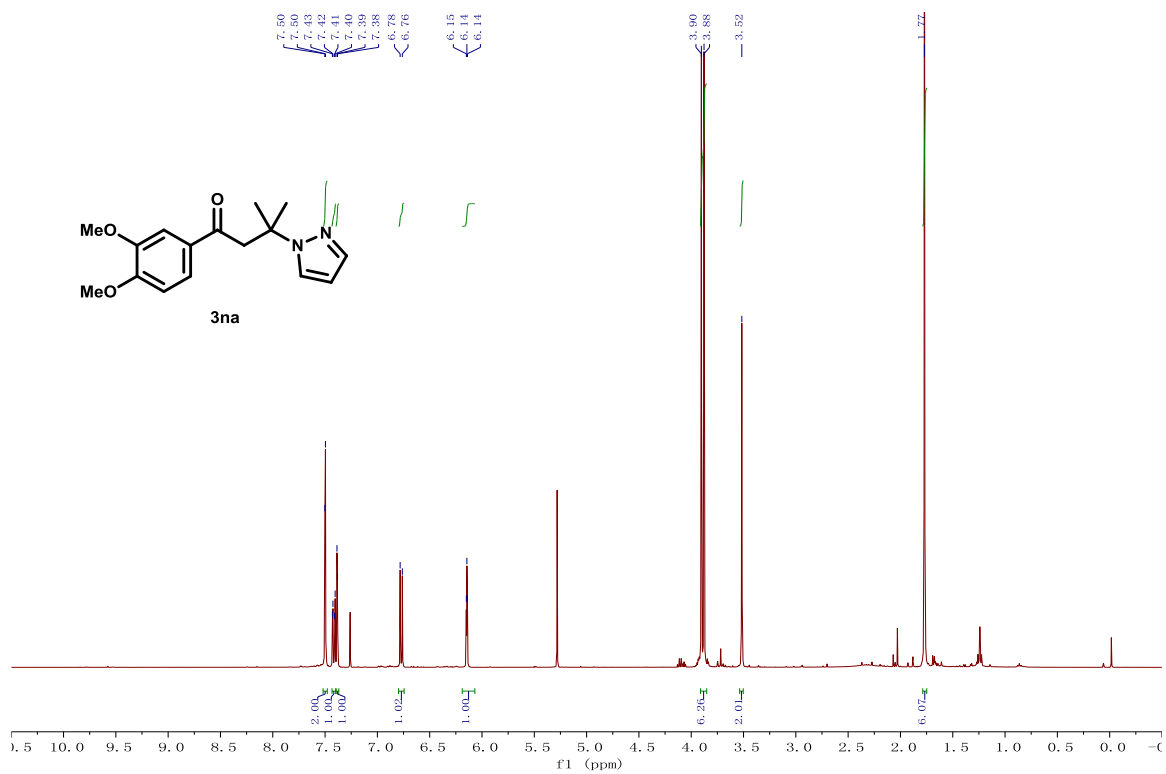

Supplementary Figure 128. <sup>1</sup>H NMR (400 MHz, CDCl<sub>3</sub>) spectrum for 3na

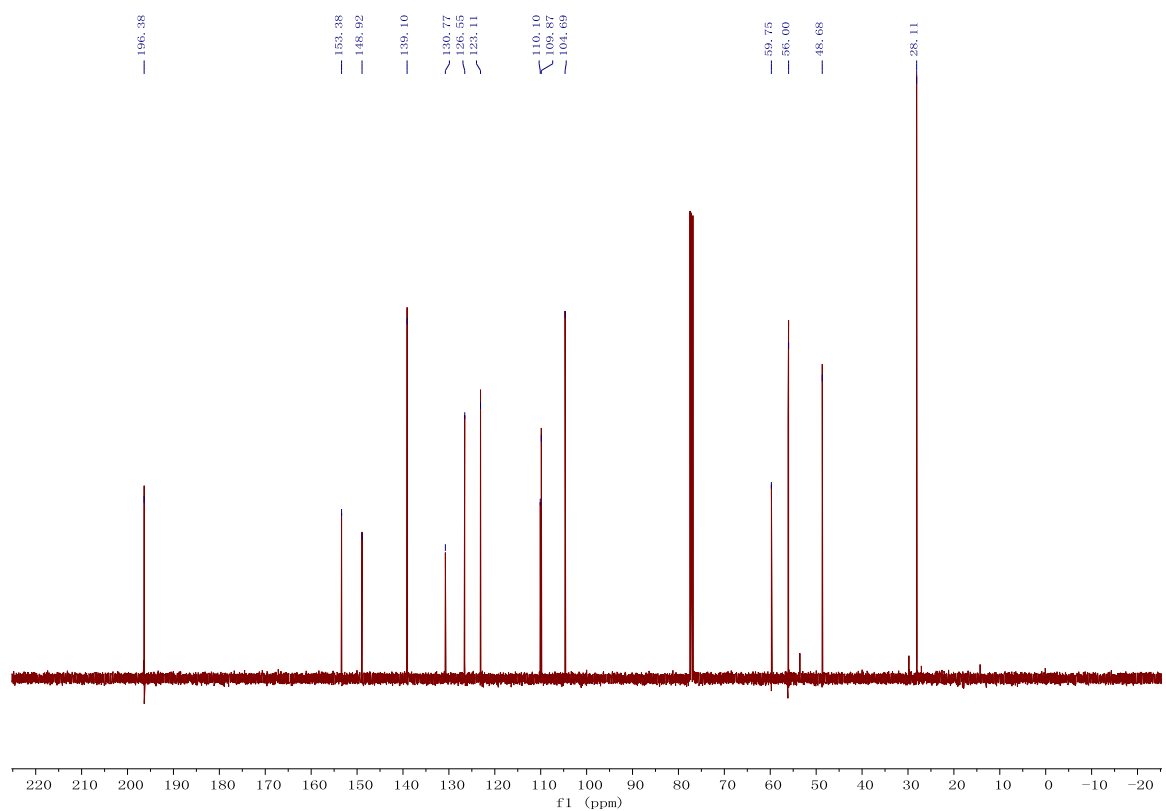

Supplementary Figure 129. <sup>13</sup>C NMR (100 MHz, CDCl<sub>3</sub>) spectrum for 3na

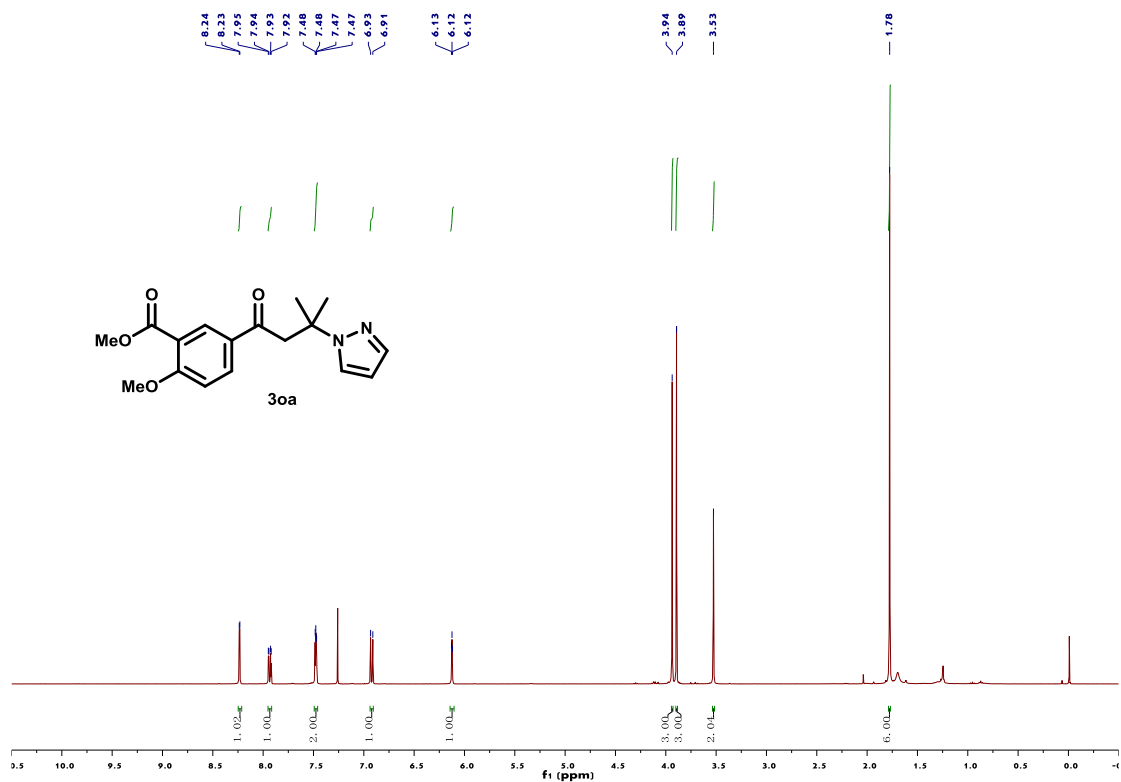

Supplementary Figure 130. <sup>1</sup>H NMR (400 MHz, CDCl<sub>3</sub>) spectrum for 30a

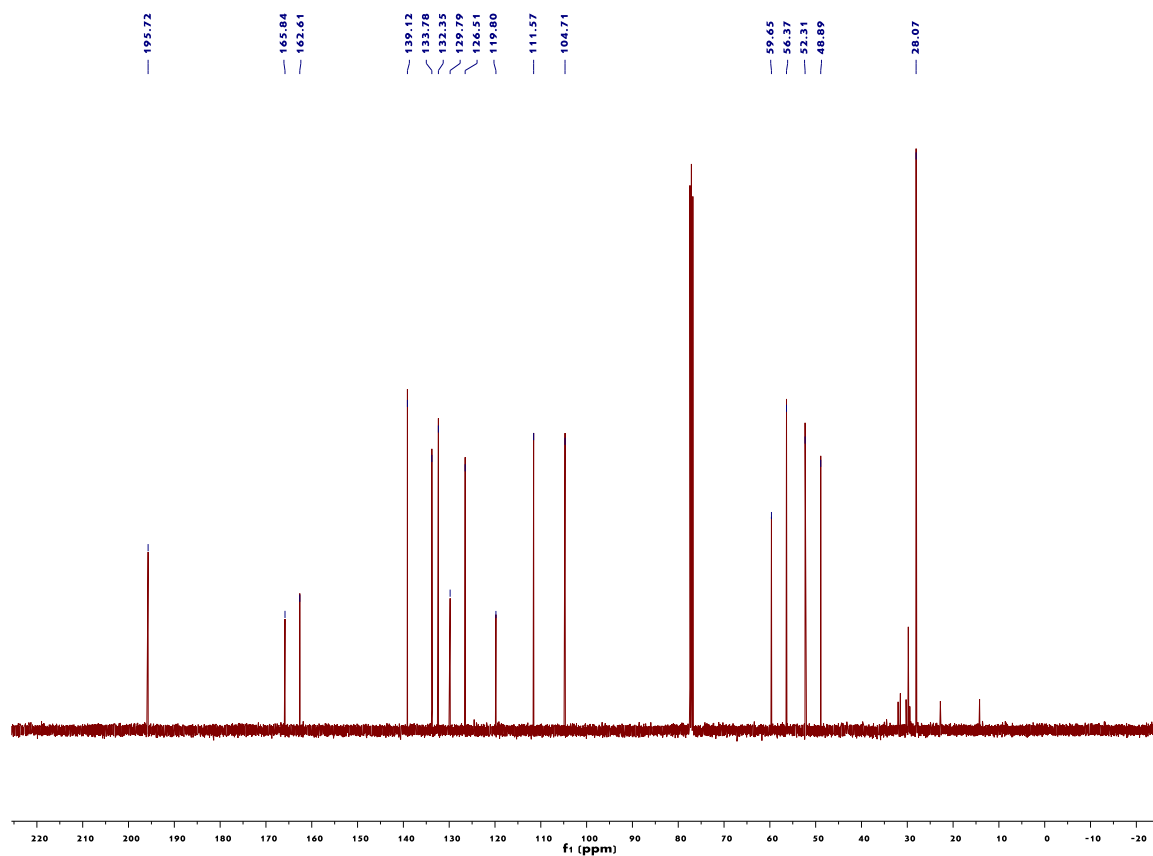

Supplementary Figure 131. <sup>13</sup>C NMR (100 MHz, CDCl<sub>3</sub>) spectrum for 30a

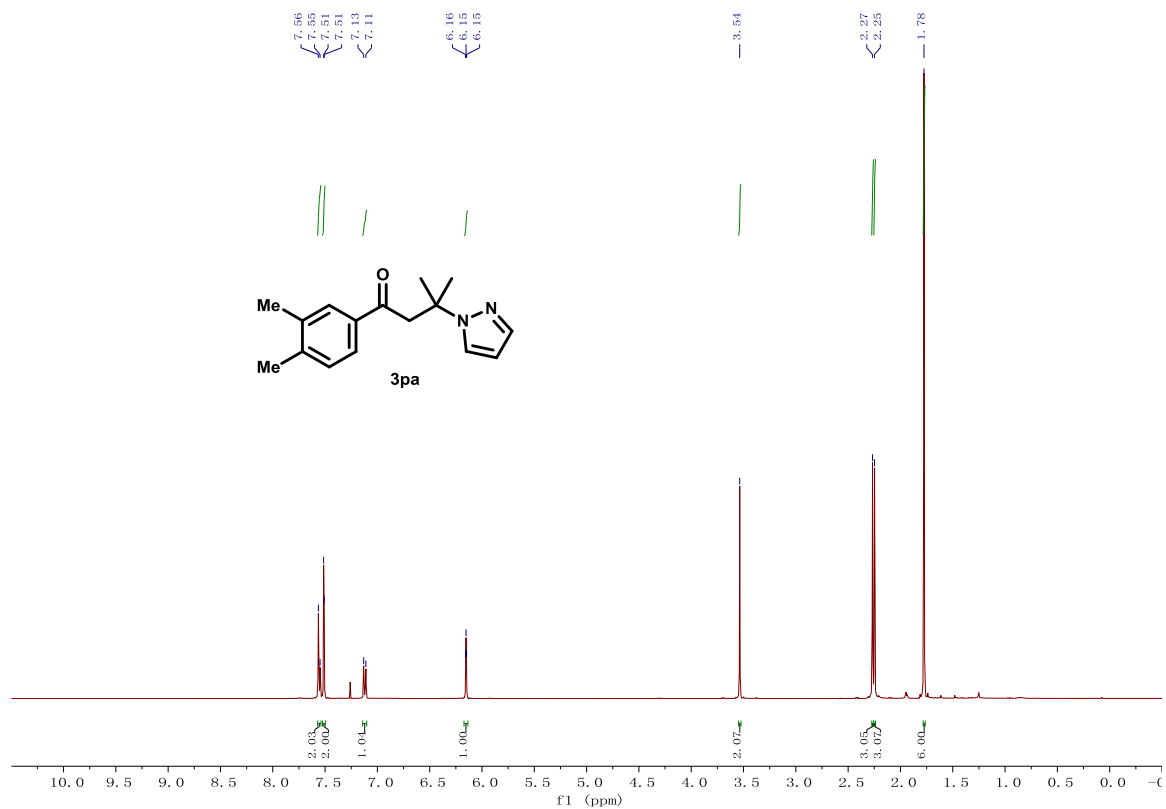

Supplementary Figure 132. <sup>1</sup>H NMR (400 MHz, CDCl<sub>3</sub>) spectrum for 3pa

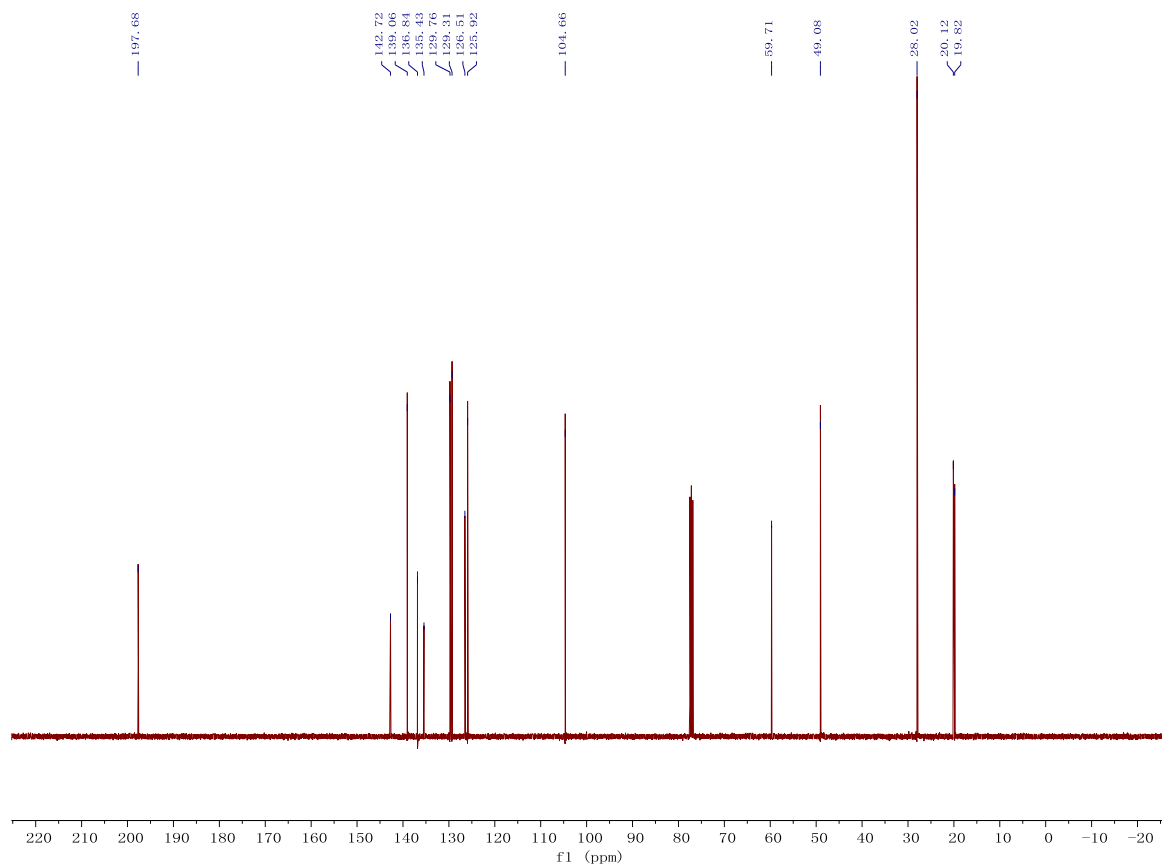

Supplementary Figure 133. <sup>13</sup>C NMR (100 MHz, CDCl<sub>3</sub>) spectrum for 3pa

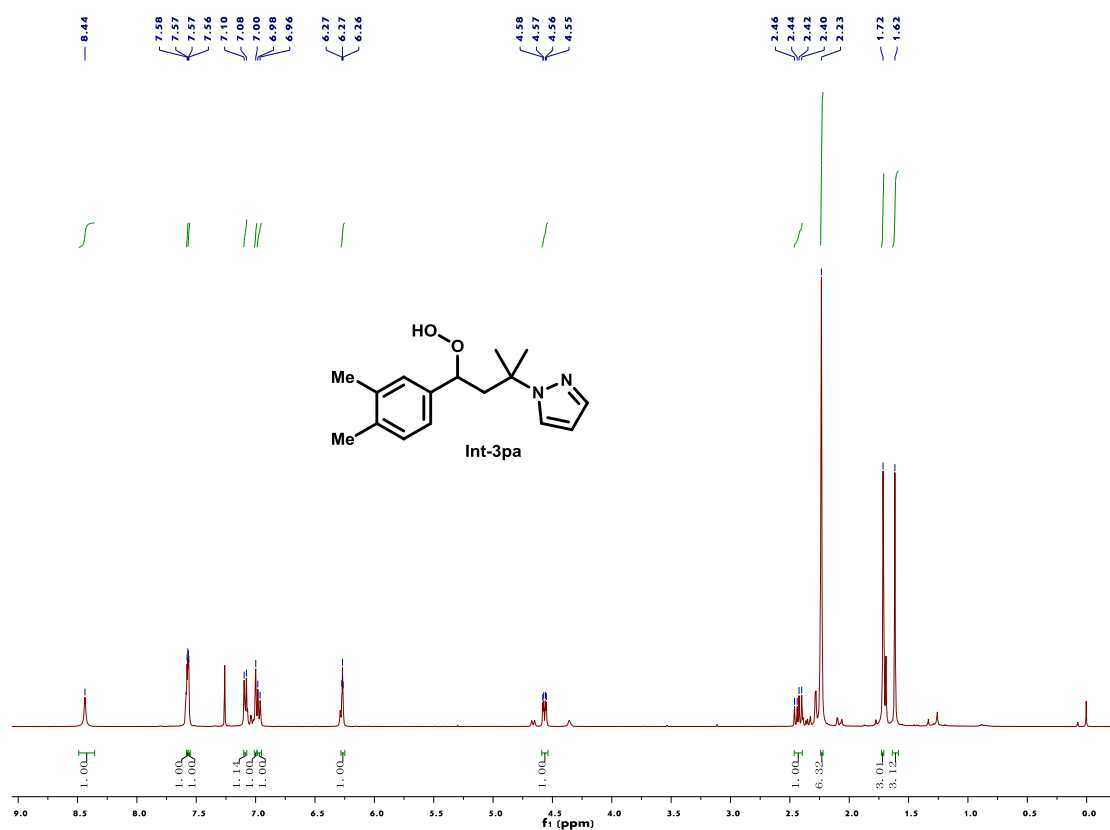

Supplementary Figure 134.  $^1\text{H}$  NMR (400 MHz,  $\text{CDCl}_3$ ) spectrum for Int-3pa

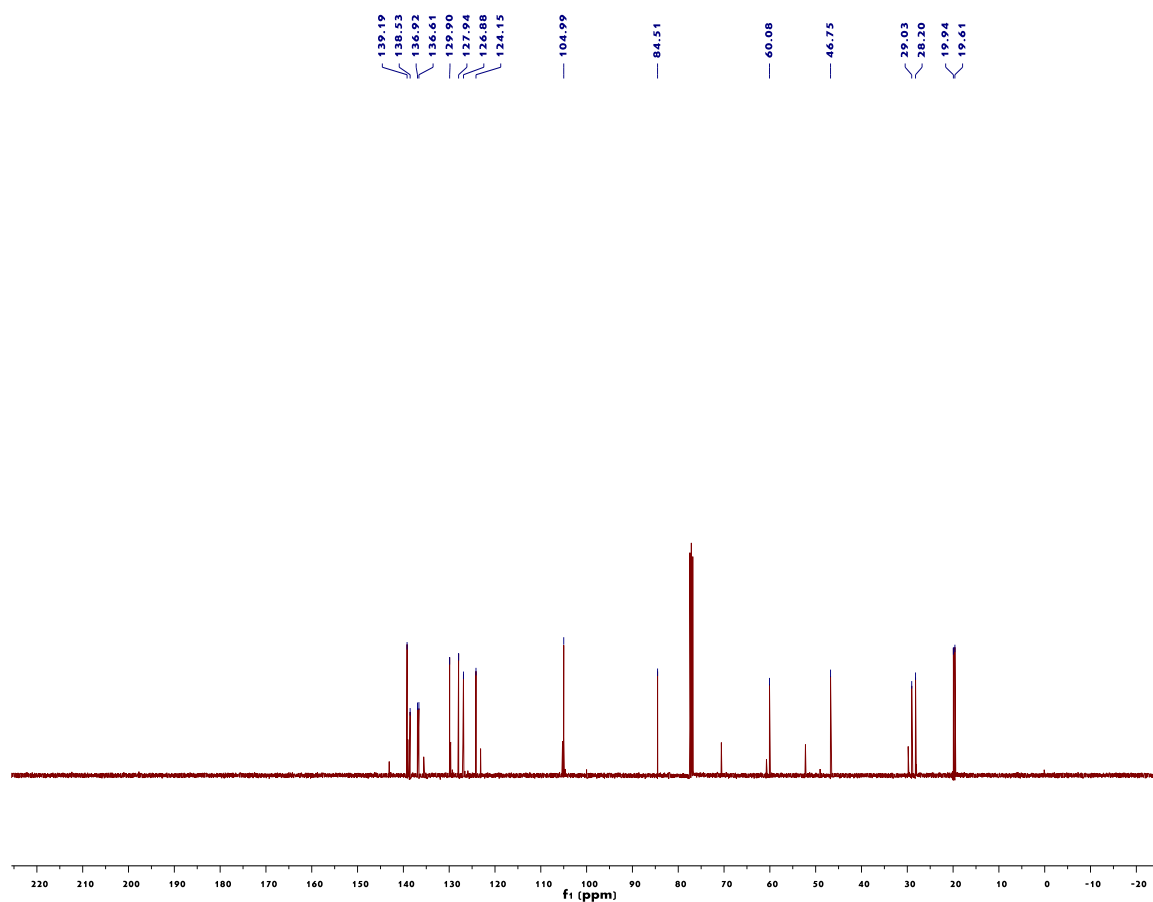

Supplementary Figure 135.  $^{13}\text{C}$  NMR (100 MHz,  $\text{CDCl}_3$ ) spectrum for Int-3pa

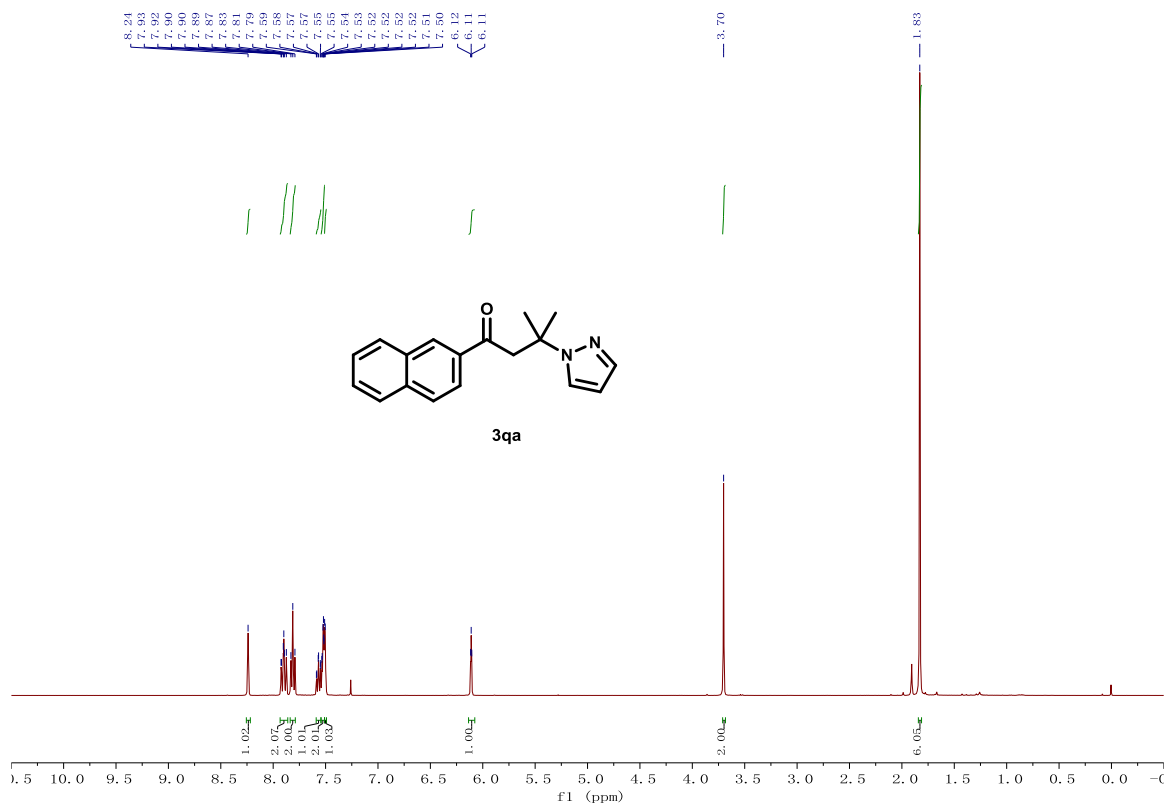

Supplementary Figure 136. <sup>1</sup>H NMR (400 MHz, CDCl<sub>3</sub>) spectrum for 3qa

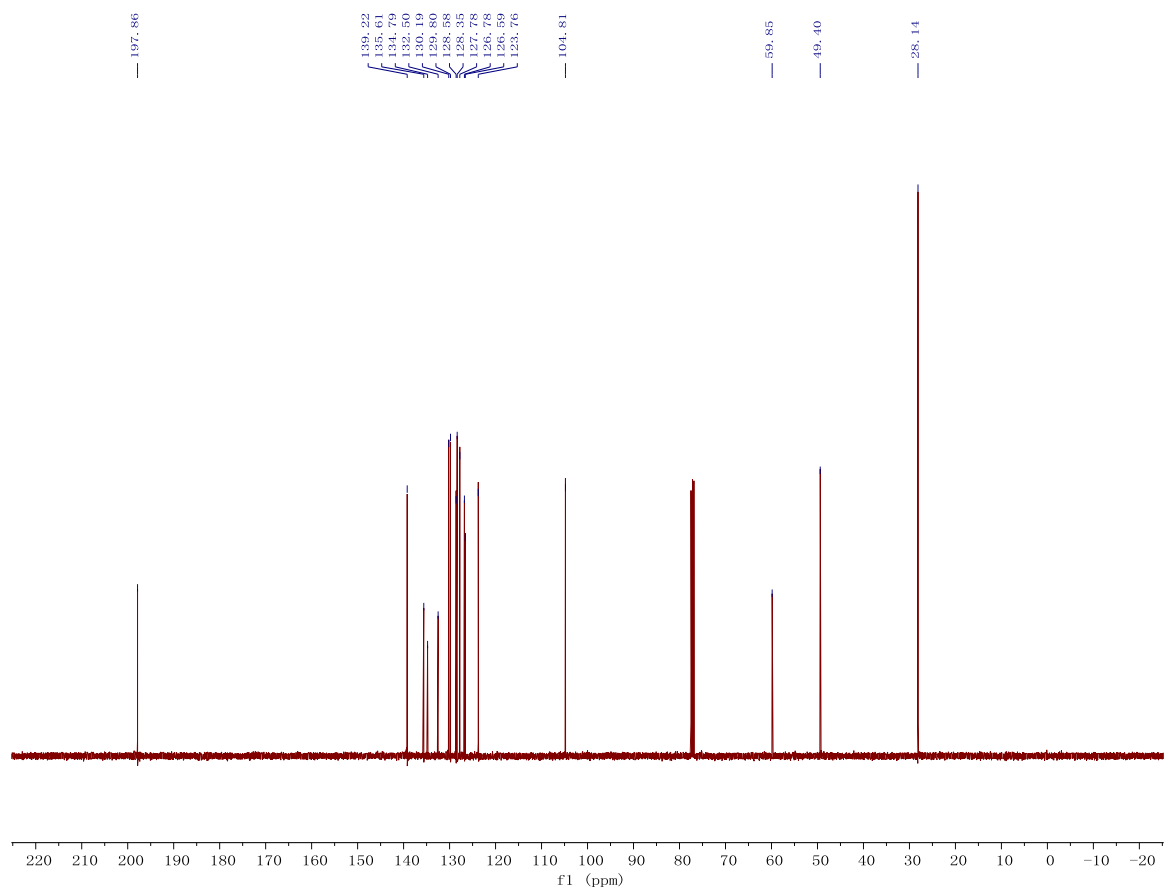

Supplementary Figure 137. <sup>13</sup>C NMR (100 MHz, CDCl<sub>3</sub>) spectrum for 3qa

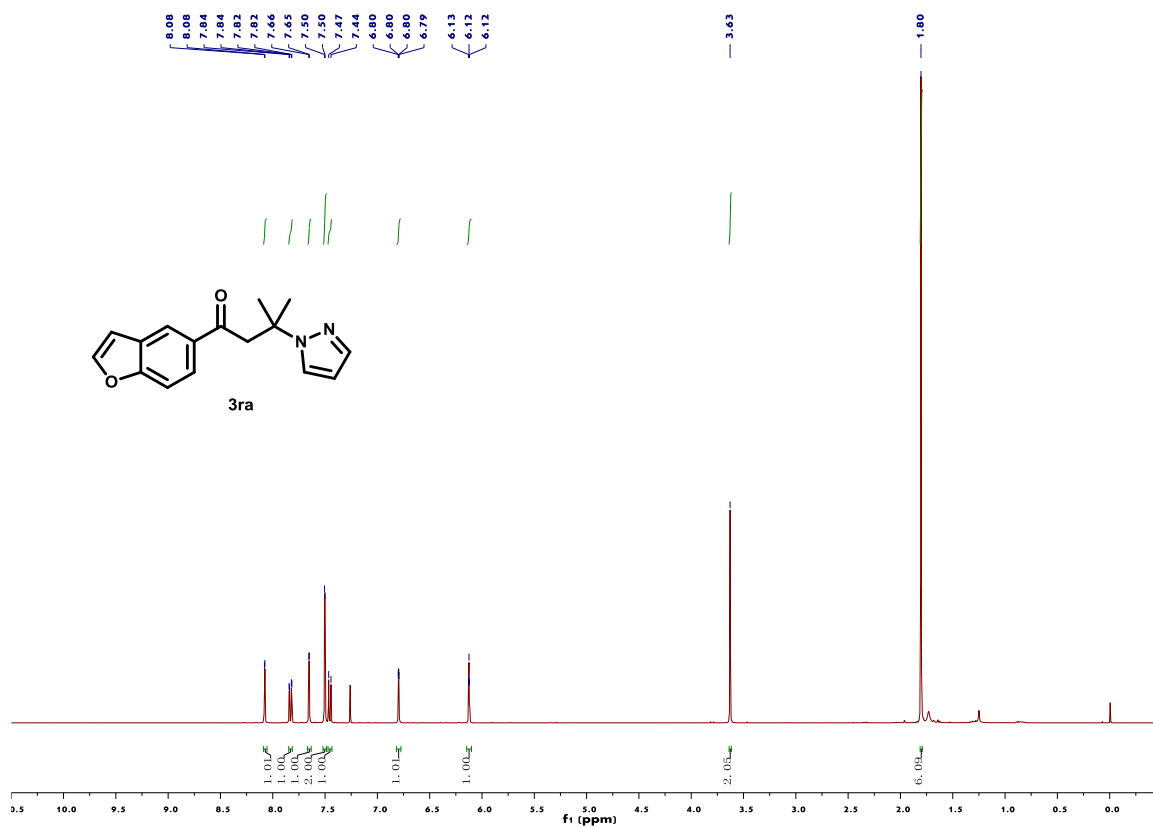

Supplementary Figure 138. <sup>1</sup>H NMR (400 MHz, CDCl<sub>3</sub>) spectrum for 3ra

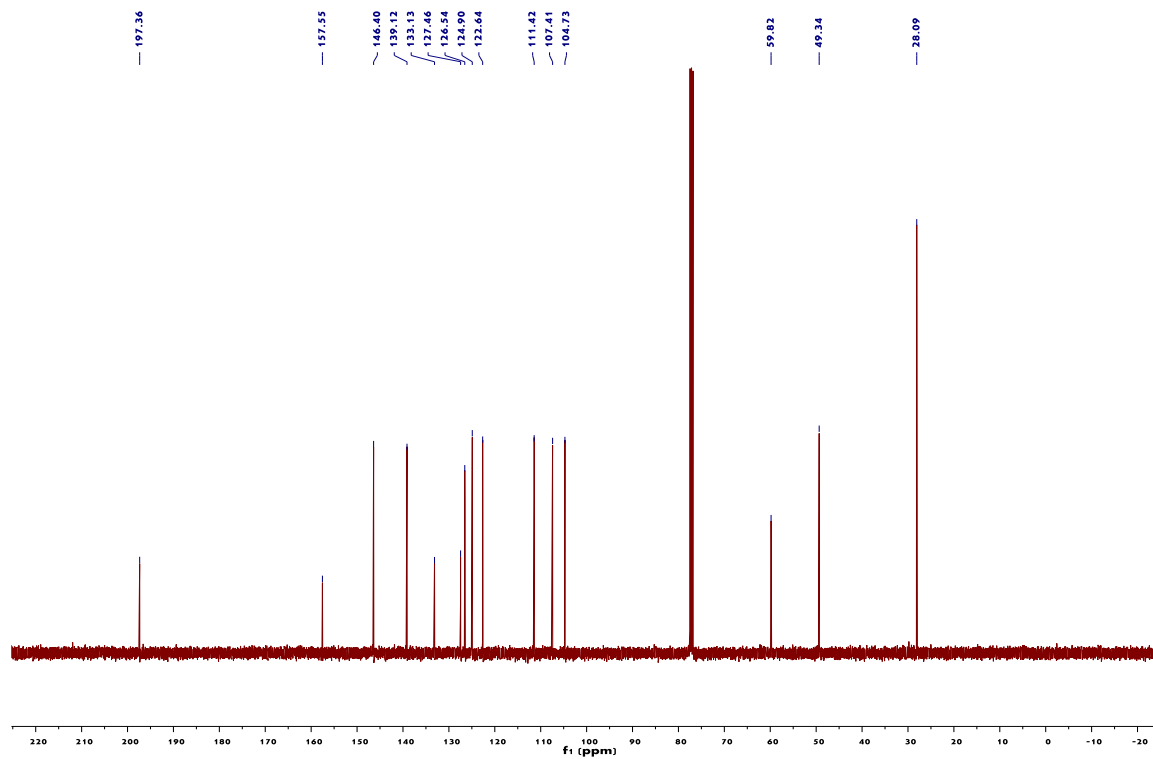

Supplementary Figure 139. <sup>13</sup>C NMR (100 MHz, CDCl<sub>3</sub>) spectrum for 3ra

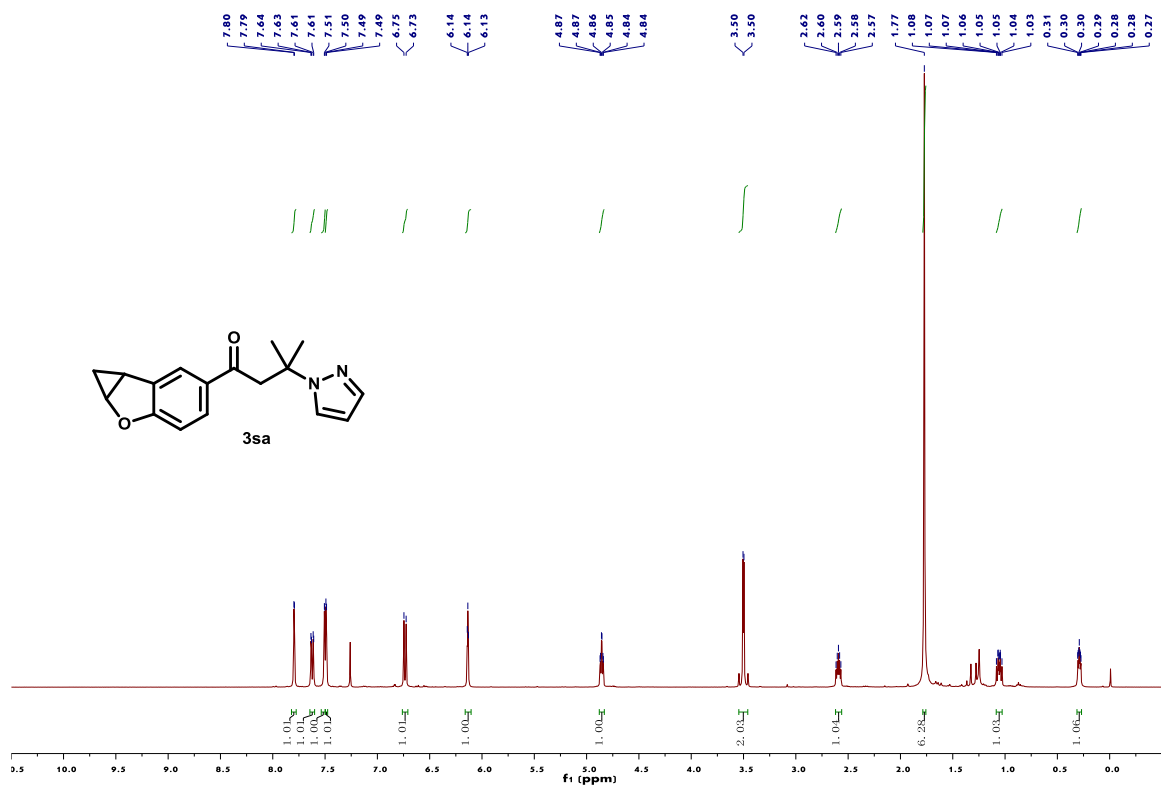

Supplementary Figure 140. <sup>1</sup>H NMR (400 MHz, CDCl<sub>3</sub>) spectrum for 3sa

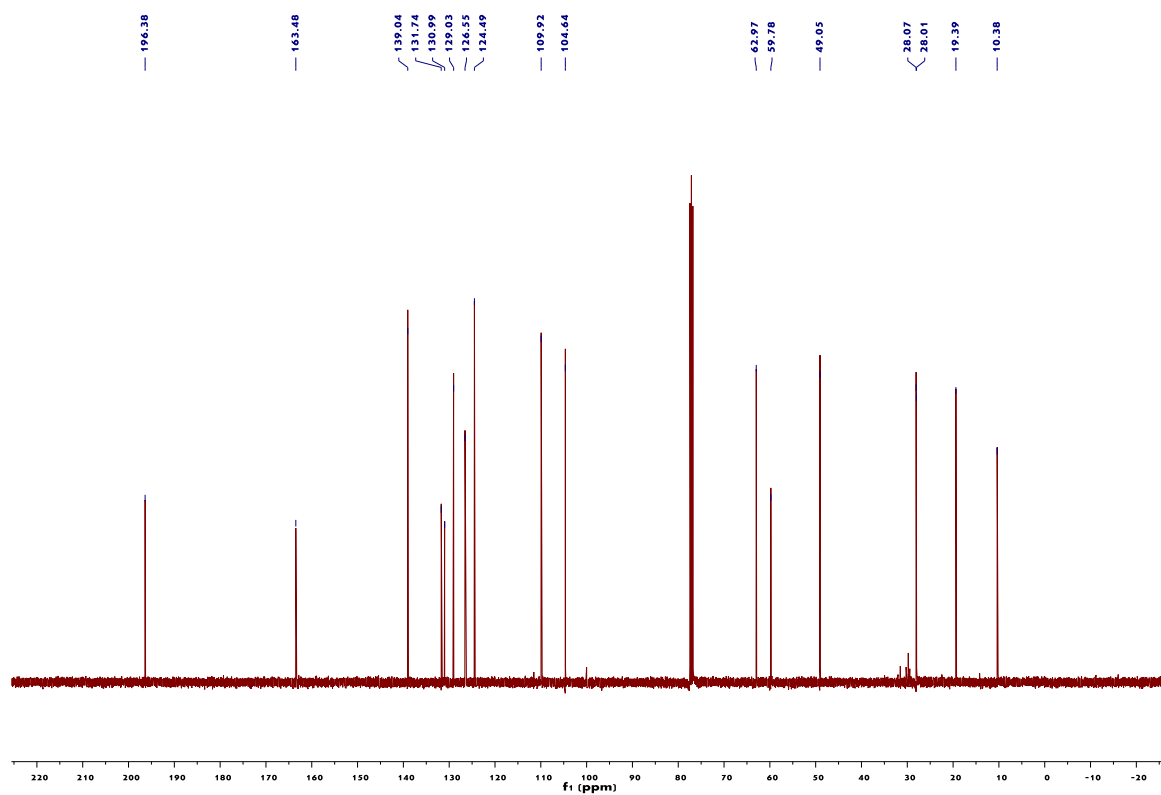

Supplementary Figure 141. <sup>13</sup>C NMR (100 MHz, CDCl<sub>3</sub>) spectrum for 3sa



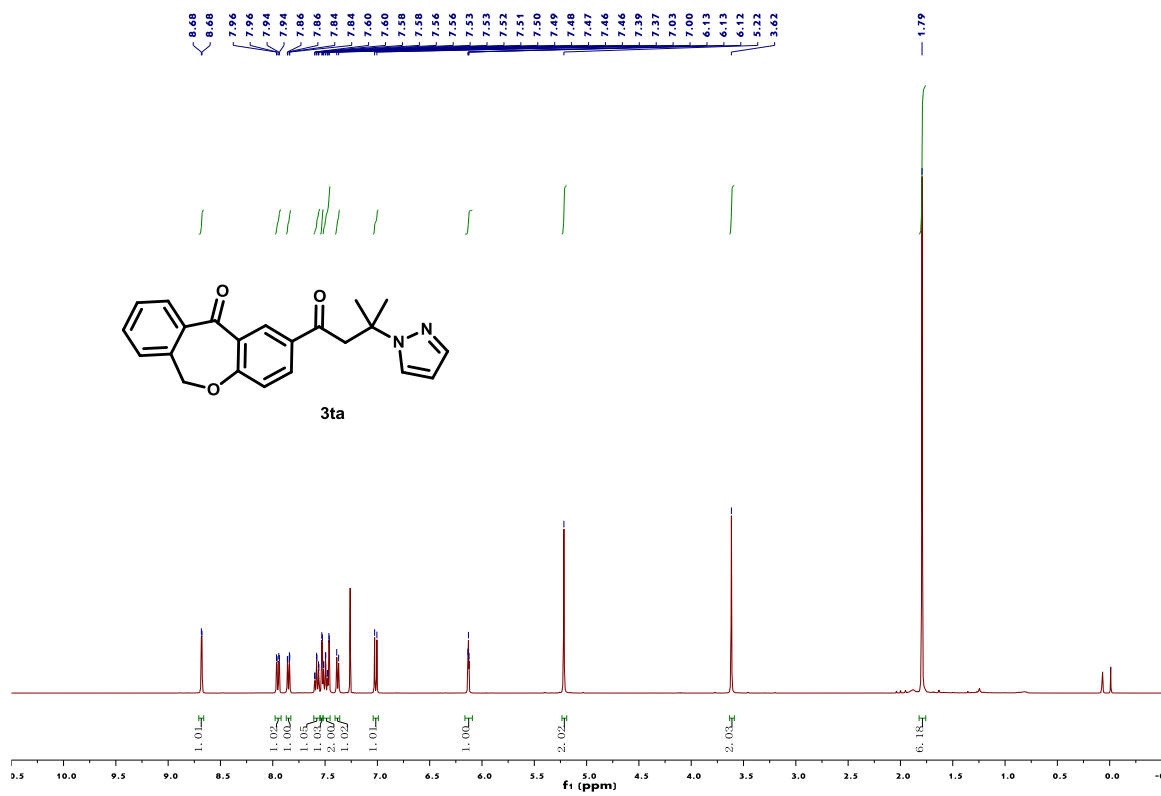

Supplementary Figure 142. <sup>1</sup>H NMR (400 MHz, CDCl<sub>3</sub>) spectrum for 3ta

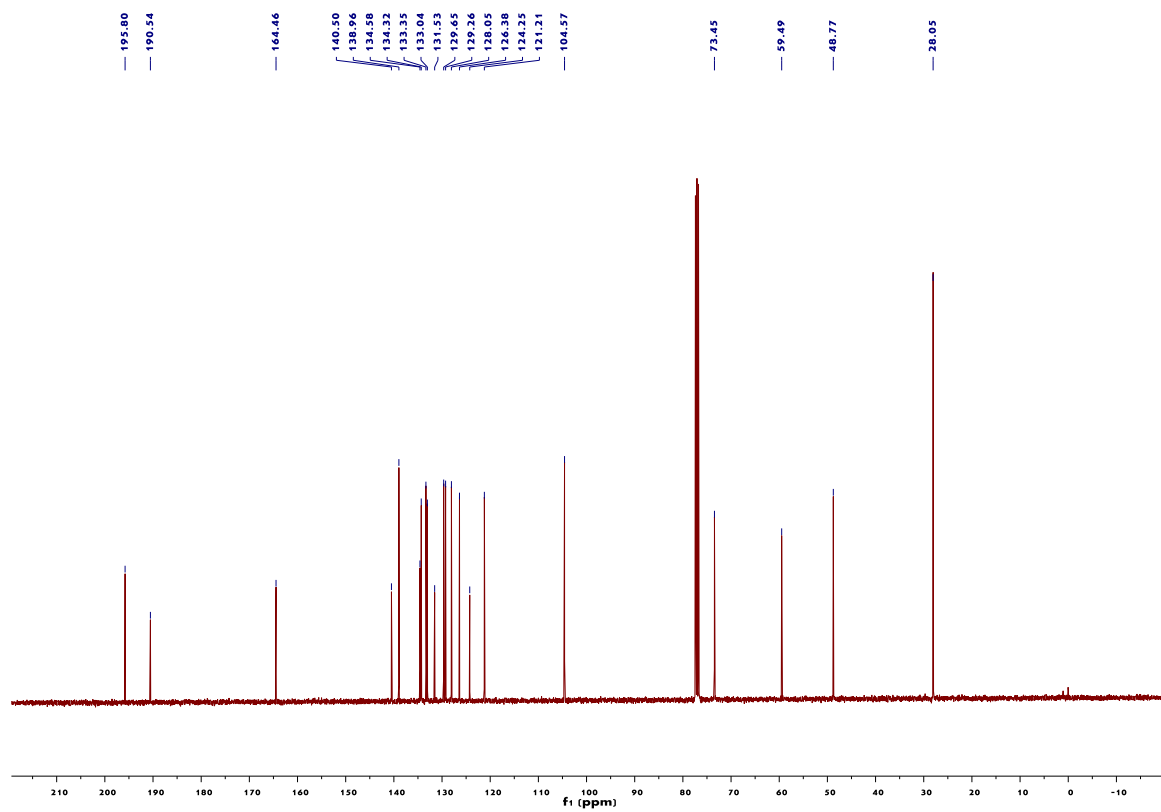

Supplementary Figure 143. <sup>13</sup>C NMR (100 MHz, CDCl<sub>3</sub>) spectrum for 3ta

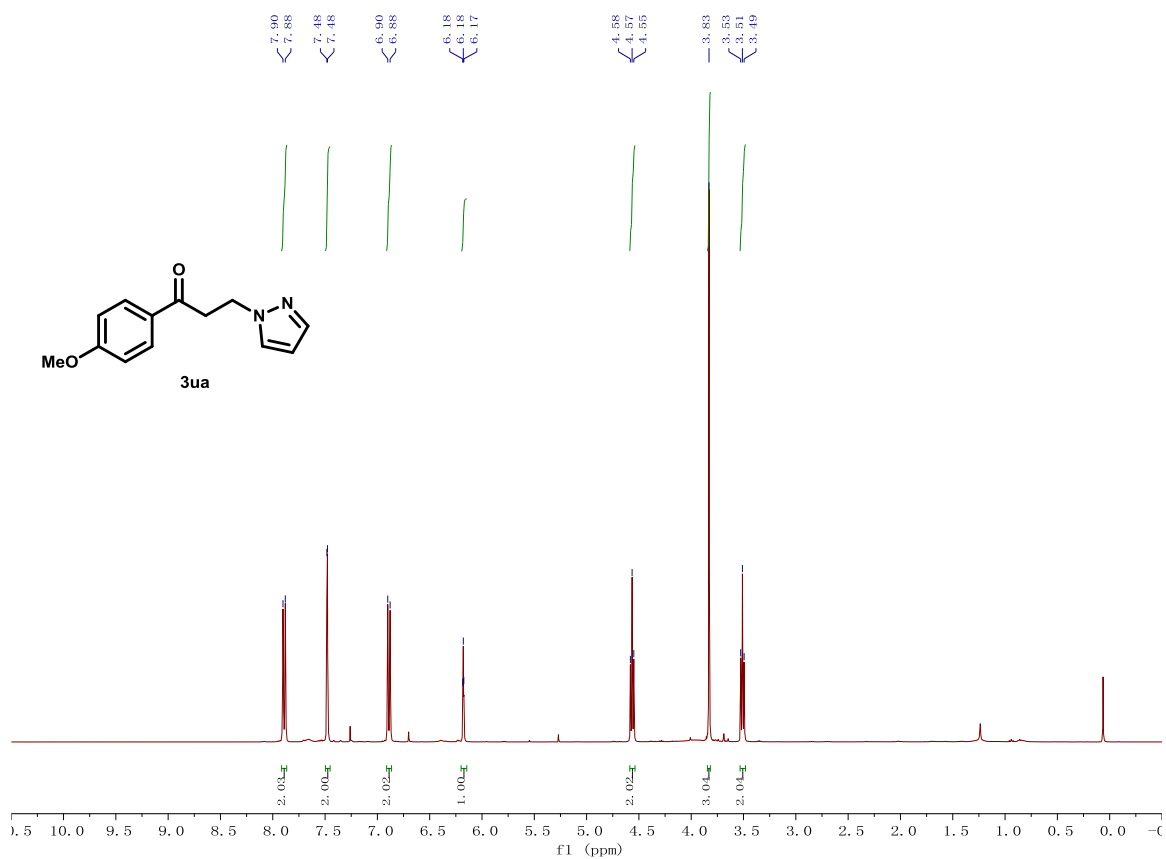

Supplementary Figure 144.  $^1\text{H}$  NMR (400 MHz,  $\text{CDCl}_3$ ) spectrum for 3ua

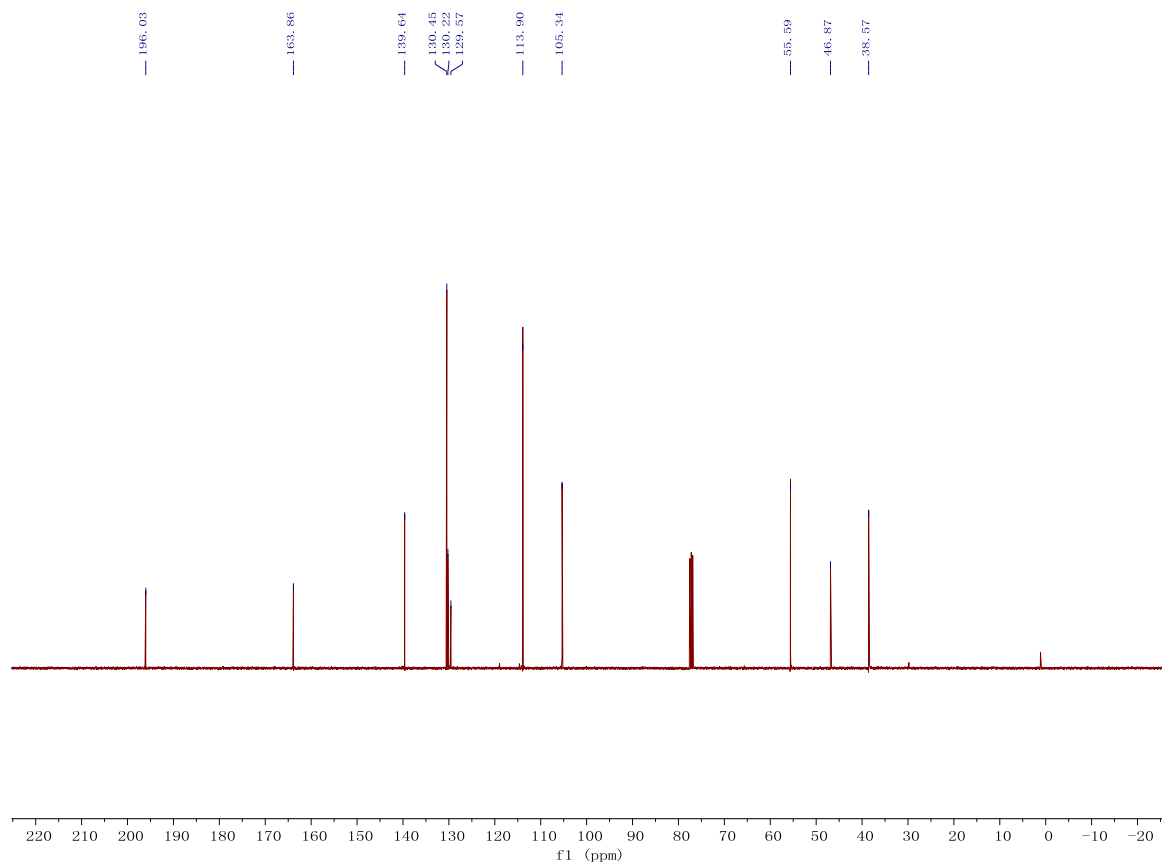

Supplementary Figure 145.  $^{13}\text{C}$  NMR (100 MHz,  $\text{CDCl}_3$ ) spectrum for 3ua

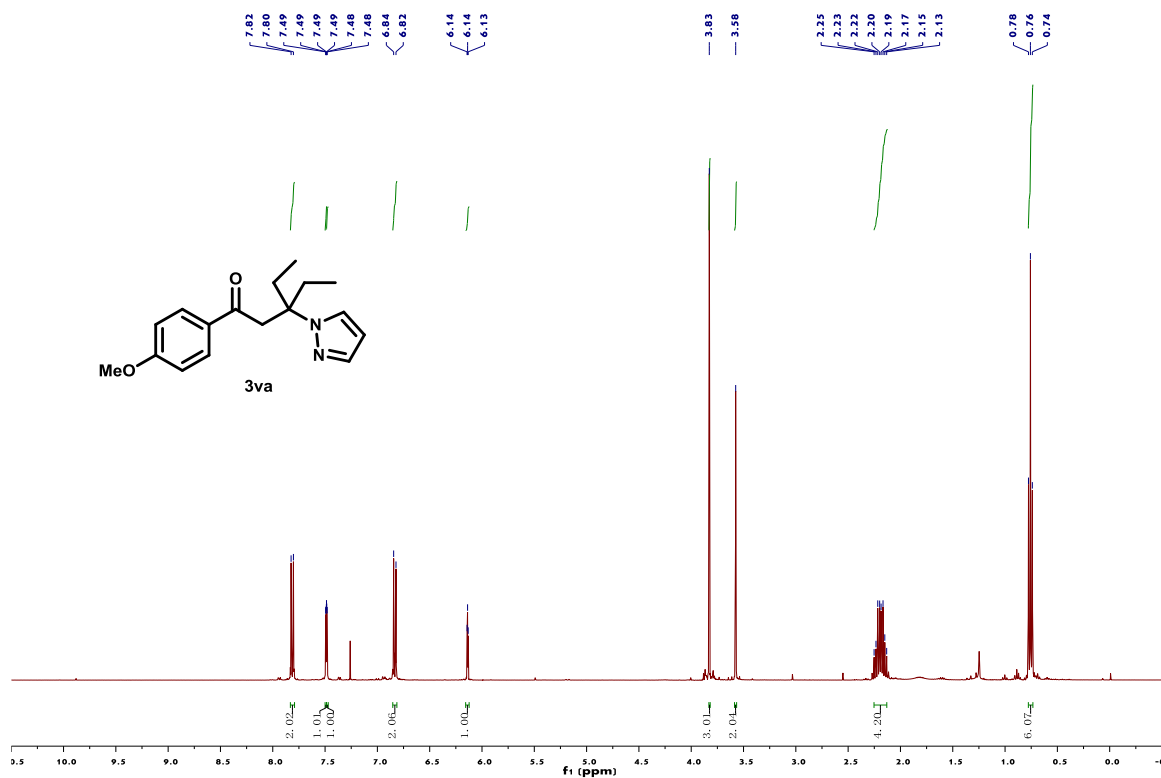

Supplementary Figure 146. <sup>1</sup>H NMR (400 MHz, CDCl<sub>3</sub>) spectrum for 3va

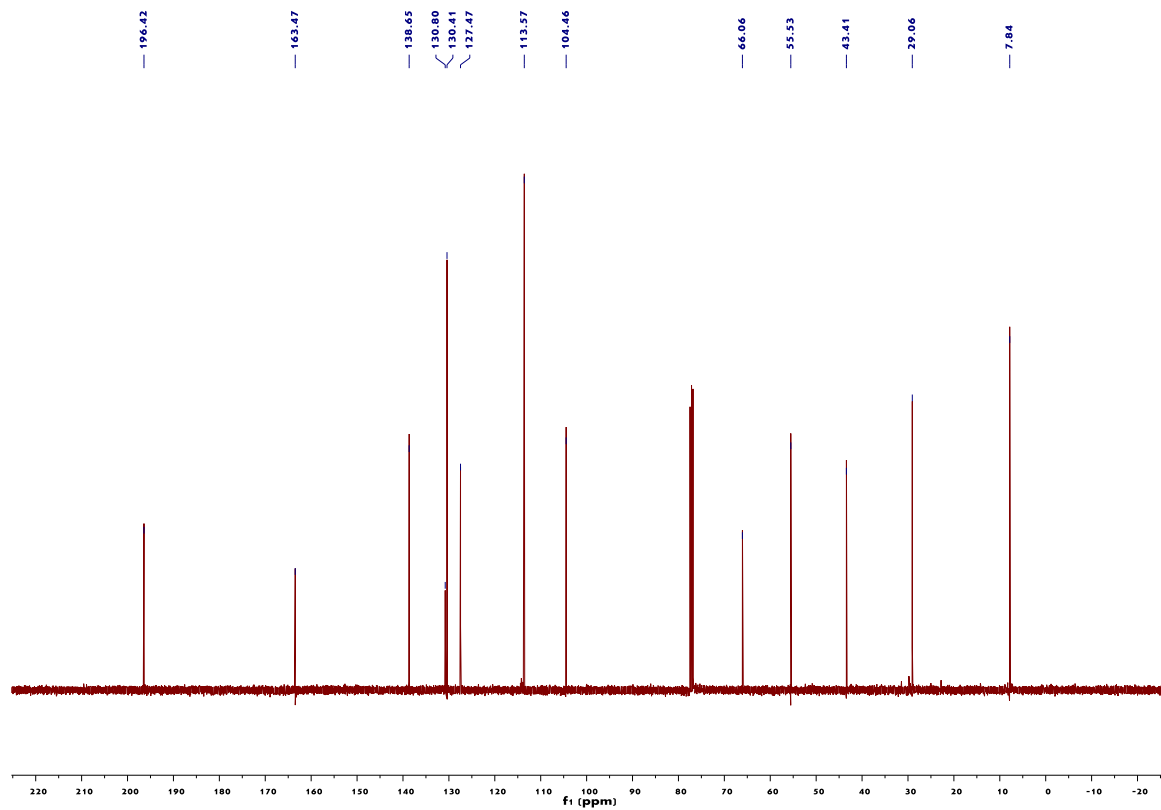

Supplementary Figure 147. <sup>13</sup>C NMR (100 MHz, CDCl<sub>3</sub>) spectrum for 3va

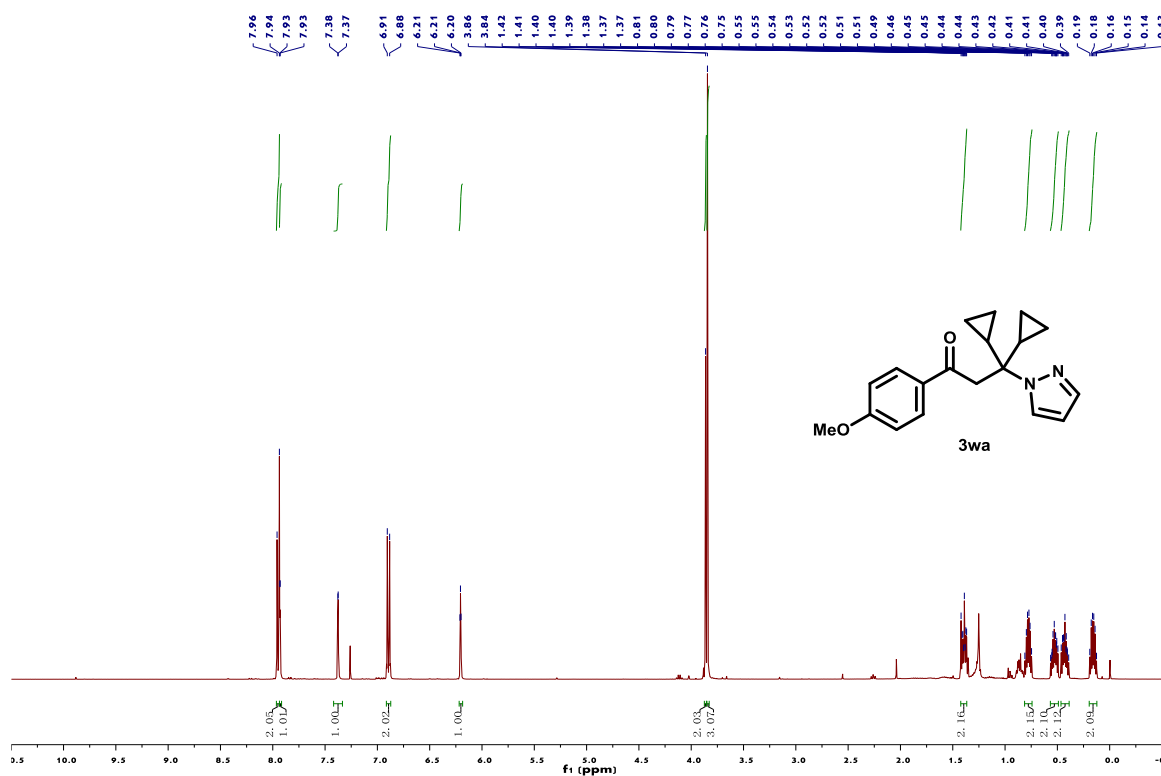

Supplementary Figure 148. <sup>1</sup>H NMR (400 MHz, CDCl<sub>3</sub>) spectrum for 3wa

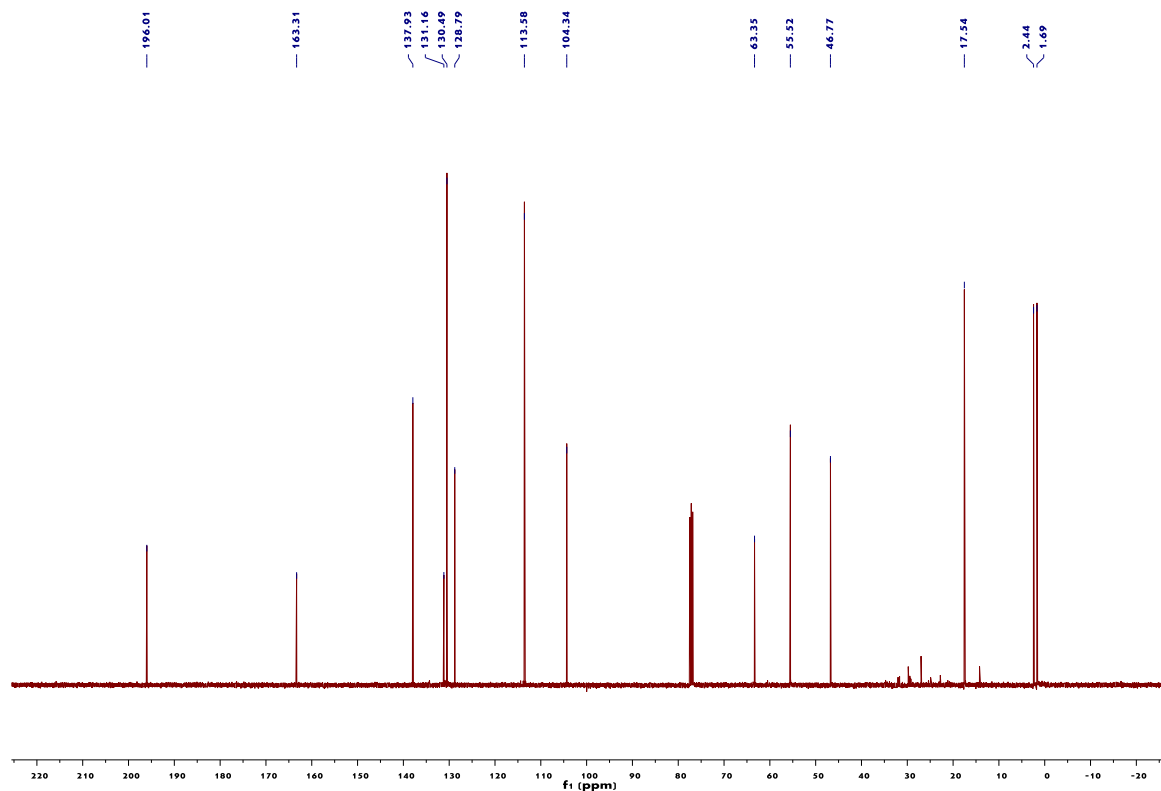

Supplementary Figure 149. <sup>13</sup>C NMR (100 MHz, CDCl<sub>3</sub>) spectrum for 3wa

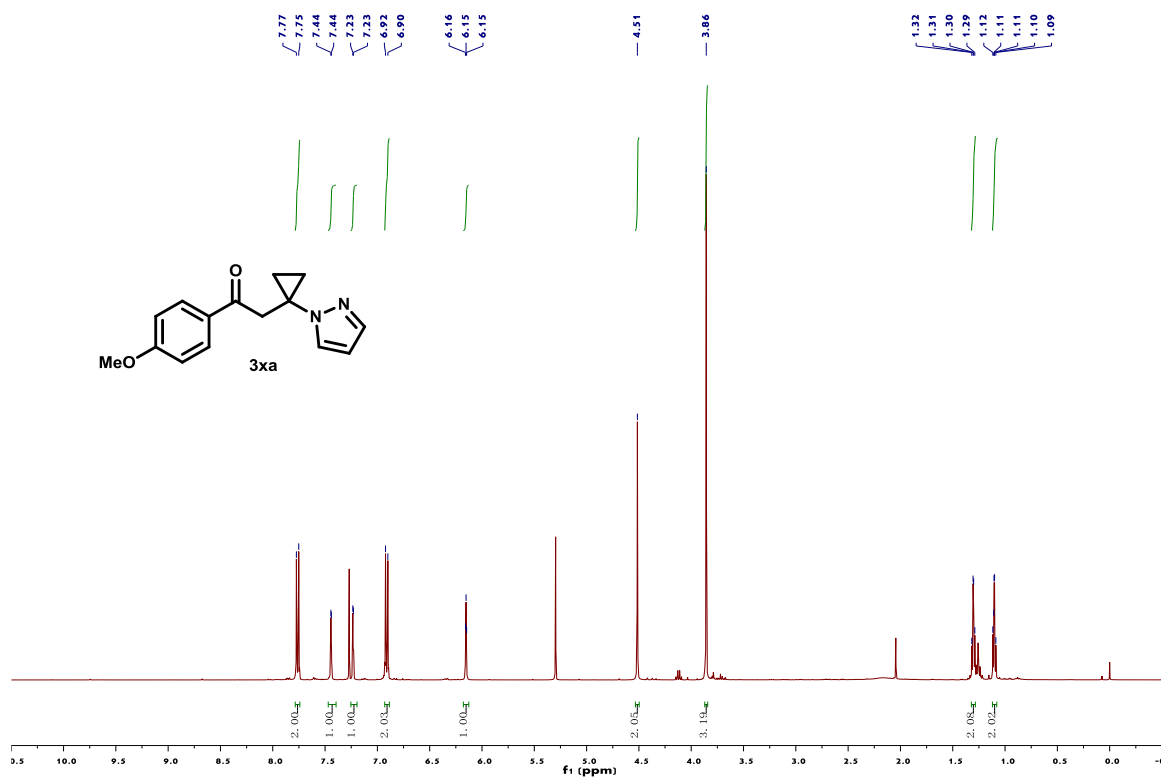

Supplementary Figure 150.  $^1\text{H}$  NMR (400 MHz,  $\text{CDCl}_3$ ) spectrum for 3xa

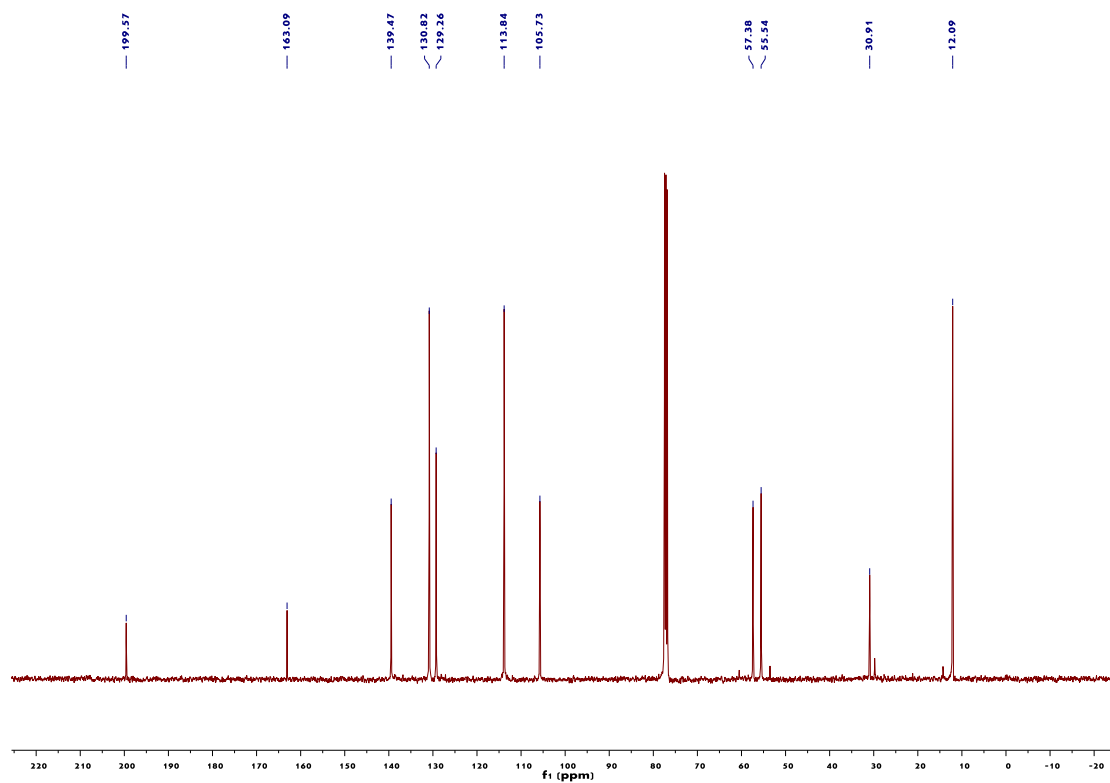

Supplementary Figure 151.  $^{13}\text{C}$  NMR (100 MHz,  $\text{CDCl}_3$ ) spectrum for 3xa

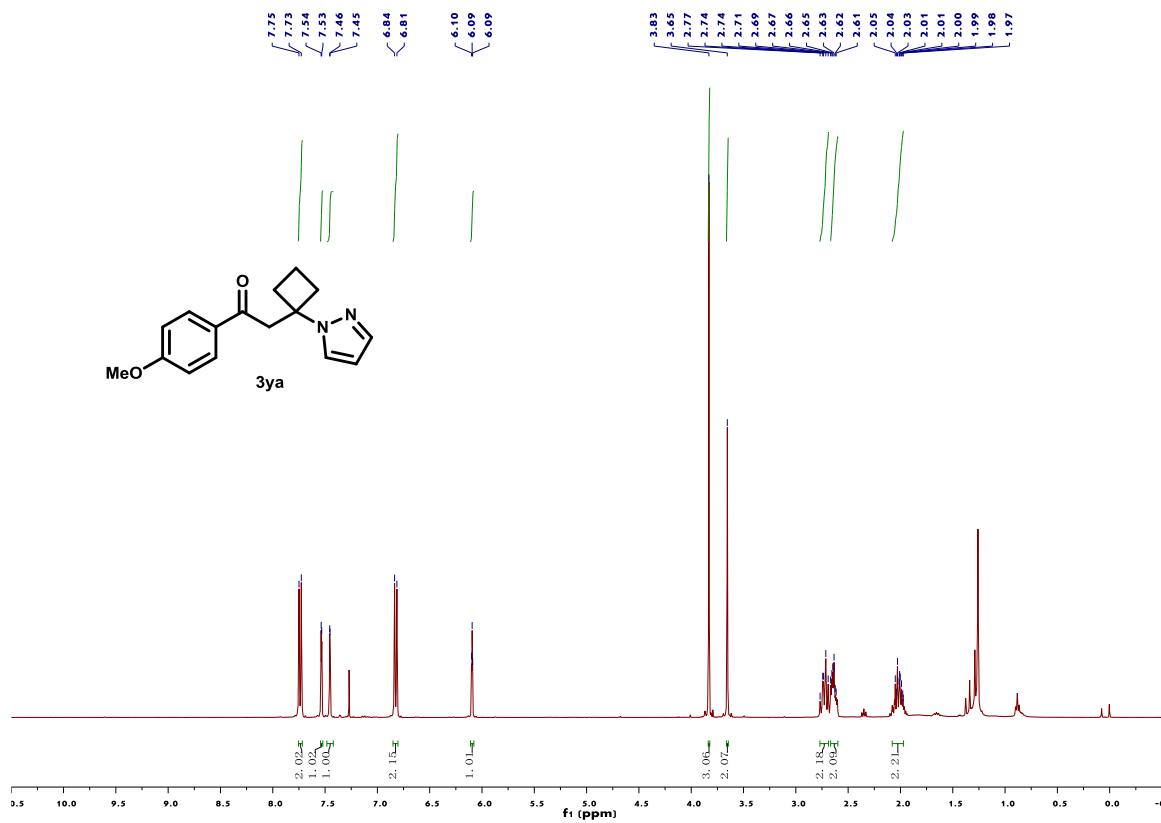

Supplementary Figure 152. <sup>1</sup>H NMR (400 MHz, CDCl<sub>3</sub>) spectrum for 3ya

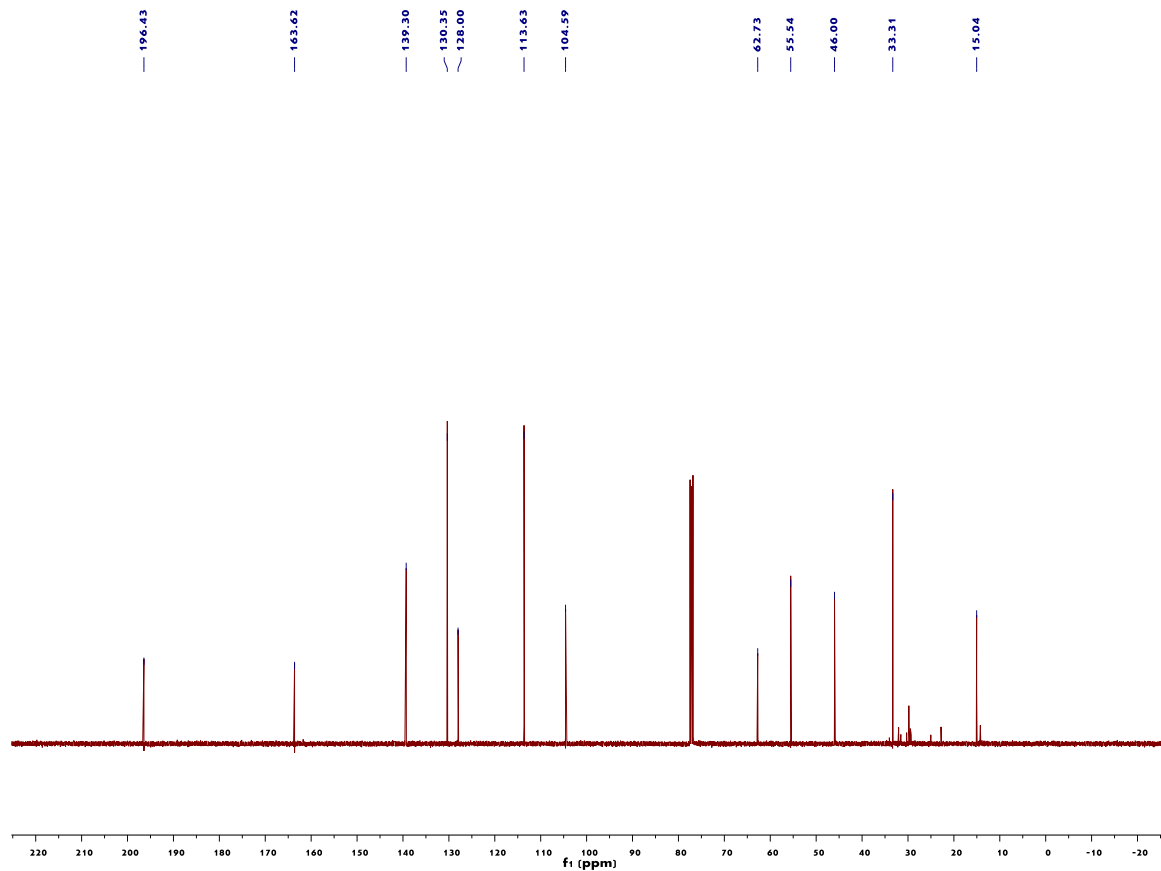

Supplementary Figure 153. <sup>13</sup>C NMR (100 MHz, CDCl<sub>3</sub>) spectrum for 3ya

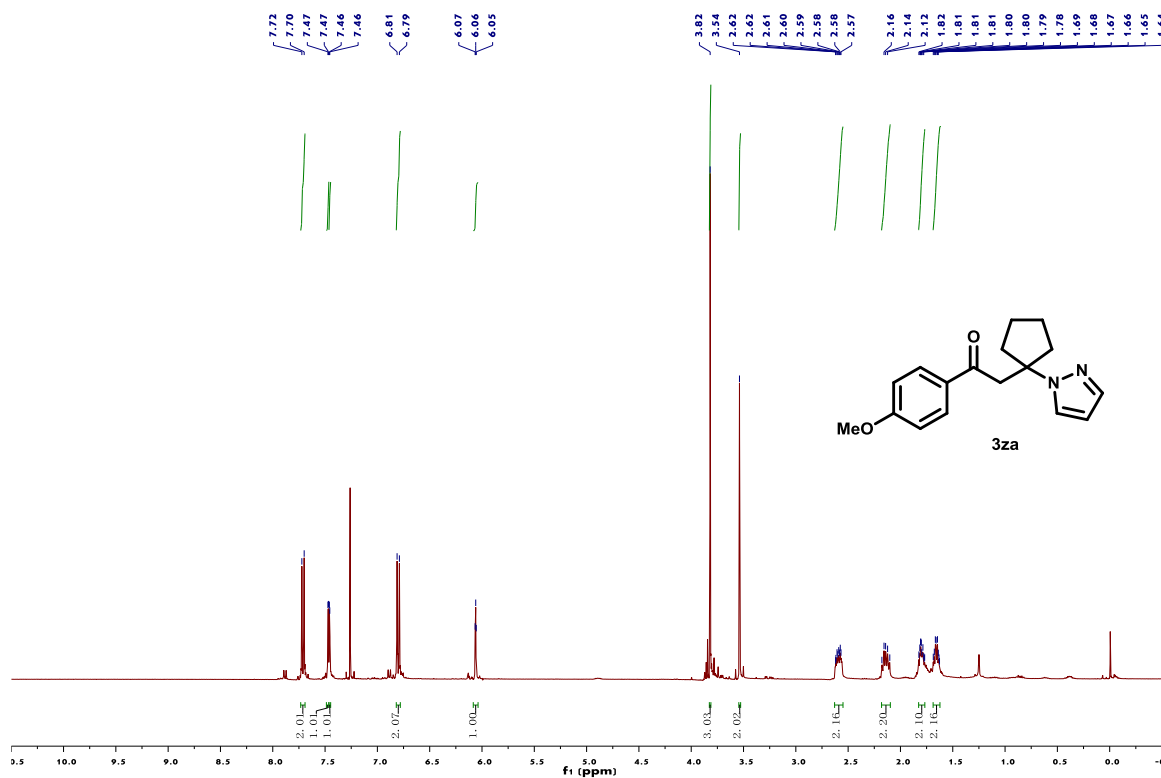

Supplementary Figure 154. <sup>1</sup>H NMR (400 MHz, CDCl<sub>3</sub>) spectrum for 3za

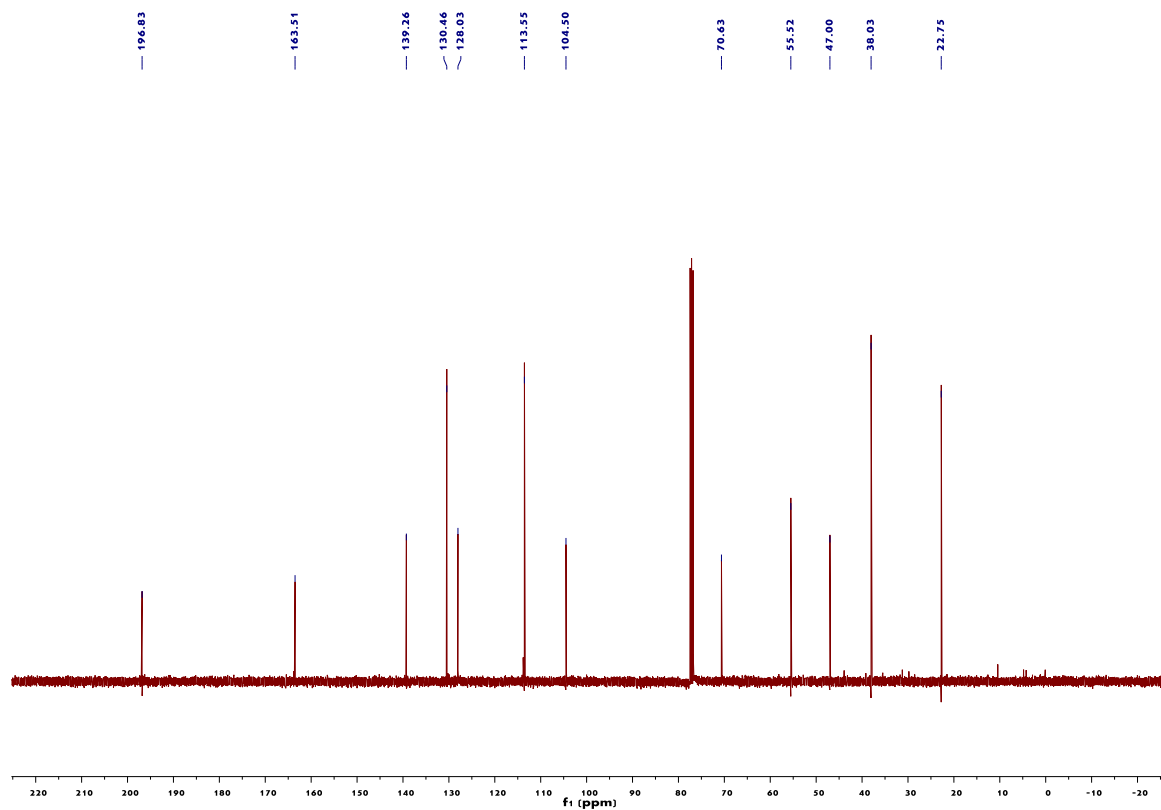

Supplementary Figure 155. <sup>13</sup>C NMR (100 MHz, CDCl<sub>3</sub>) spectrum for 3za

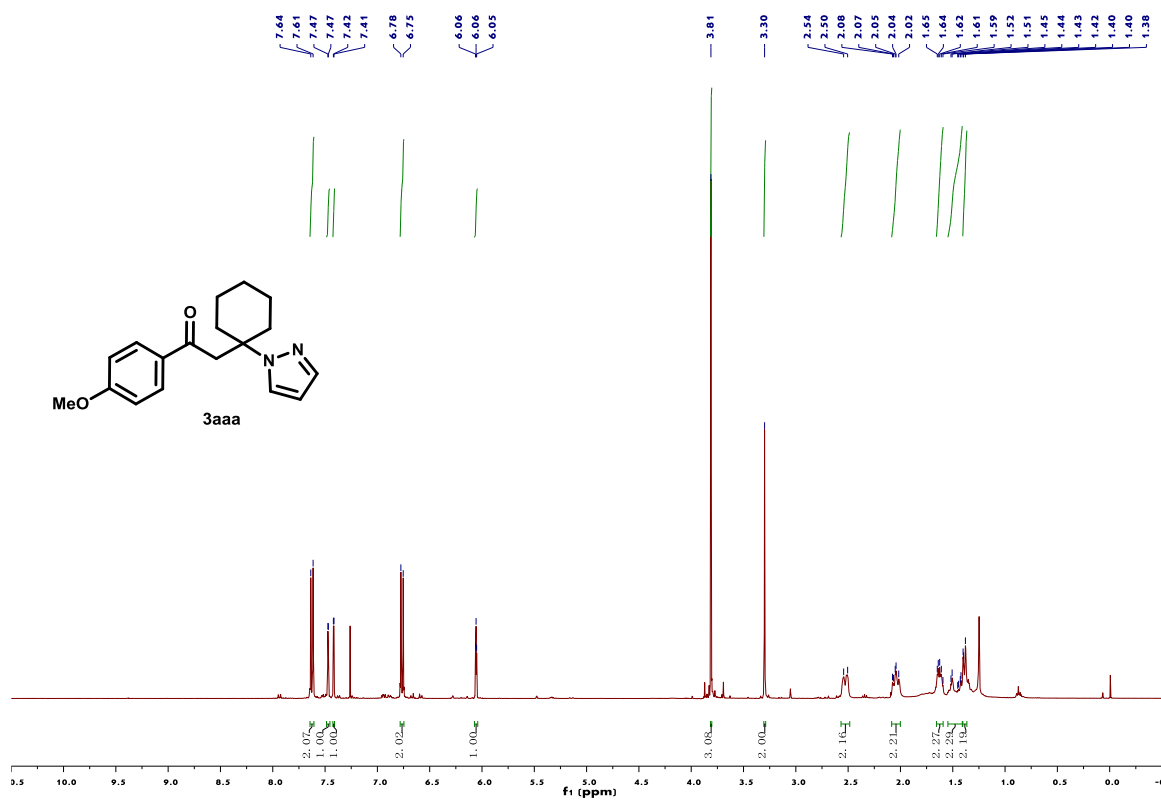

Supplementary Figure 156. <sup>1</sup>H NMR (400 MHz, CDCl<sub>3</sub>) spectrum for 3aaa

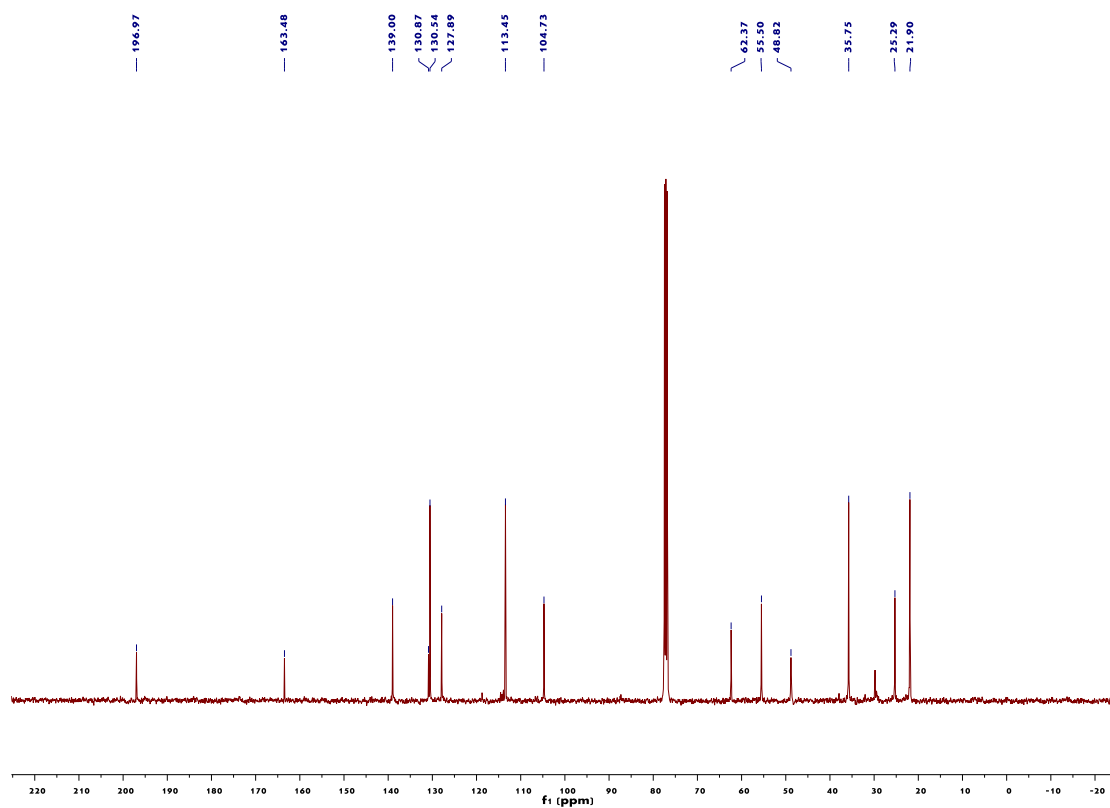

Supplementary Figure 157. <sup>13</sup>C NMR (100 MHz, CDCl<sub>3</sub>) spectrum for 3aaa



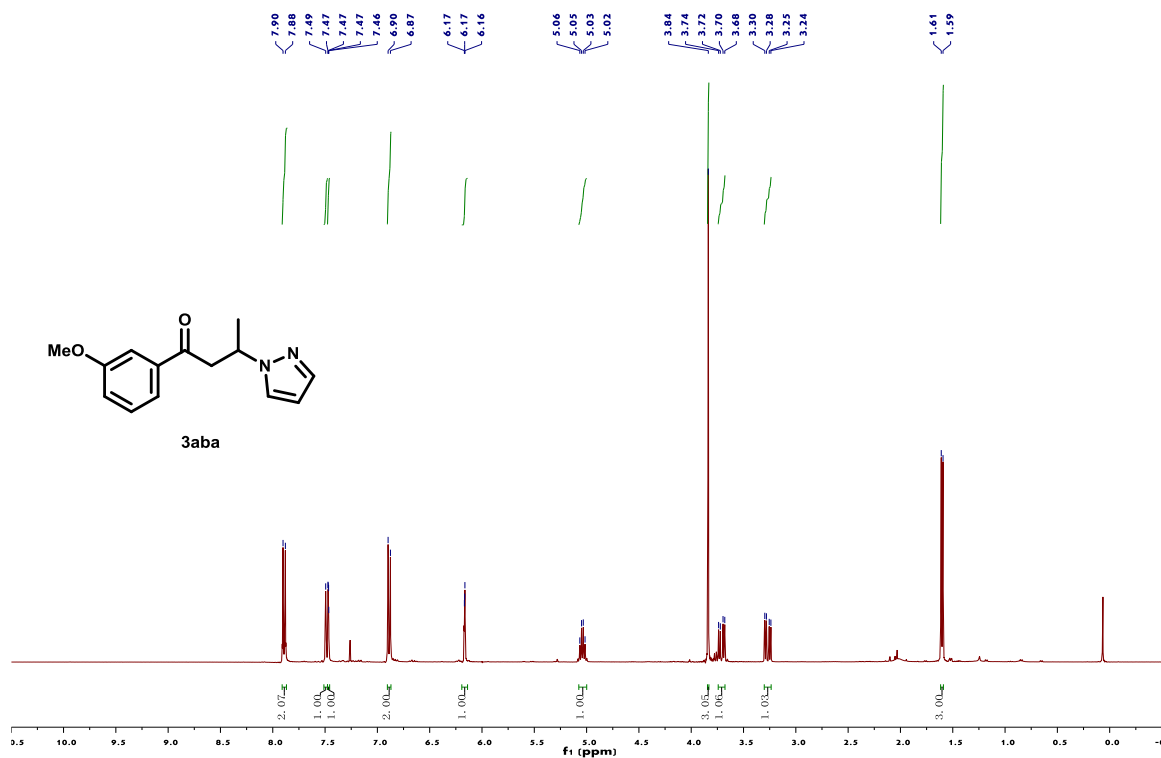

Supplementary Figure 158. <sup>1</sup>H NMR (400 MHz, CDCl<sub>3</sub>) spectrum for 3aba

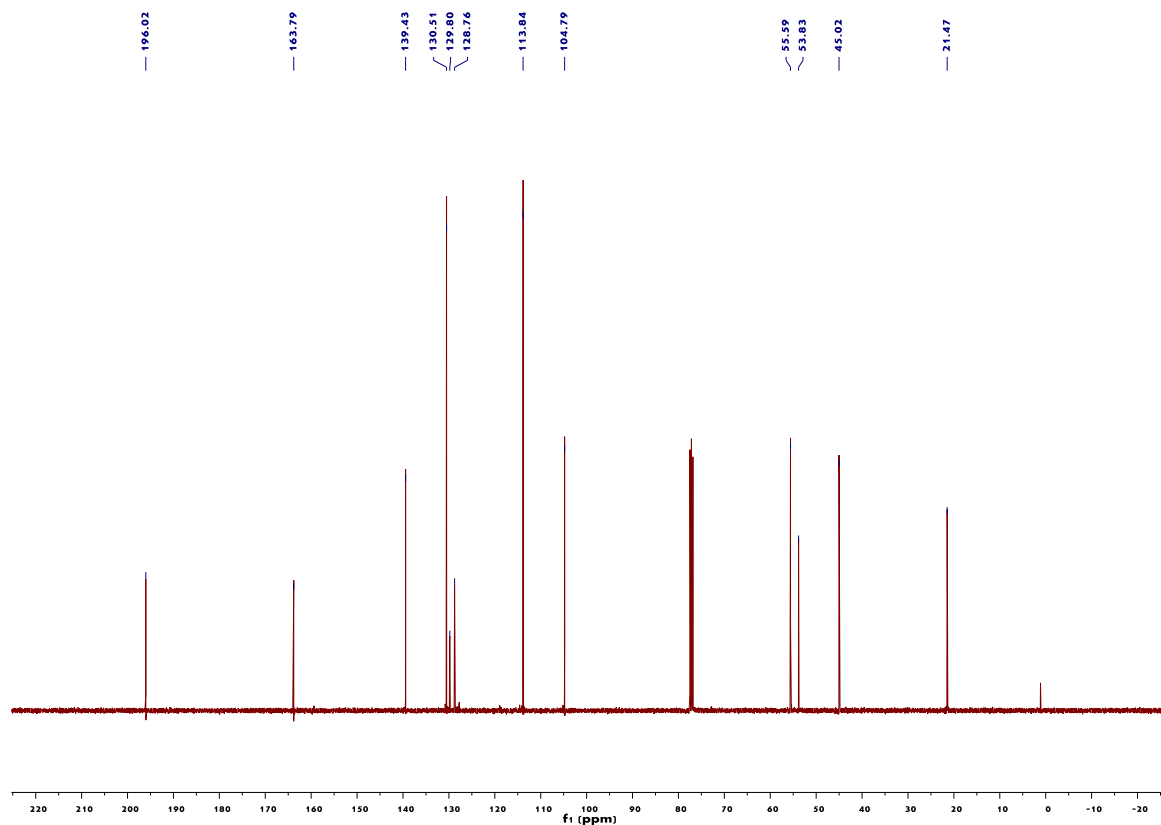

Supplementary Figure 159. <sup>13</sup>C NMR (100 MHz, CDCl<sub>3</sub>) spectrum for 3aba

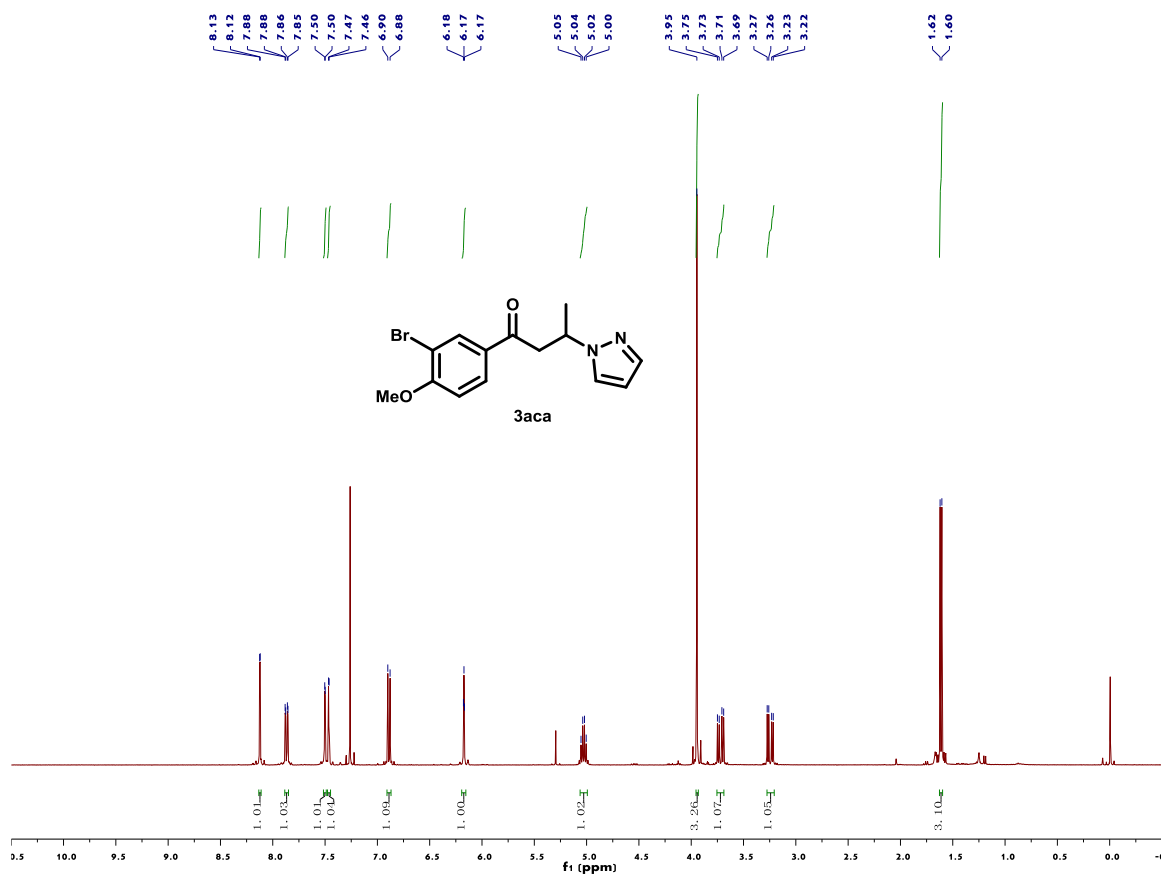

Supplementary Figure 160. <sup>1</sup>H NMR (400 MHz, CDCl<sub>3</sub>) spectrum for 3aca

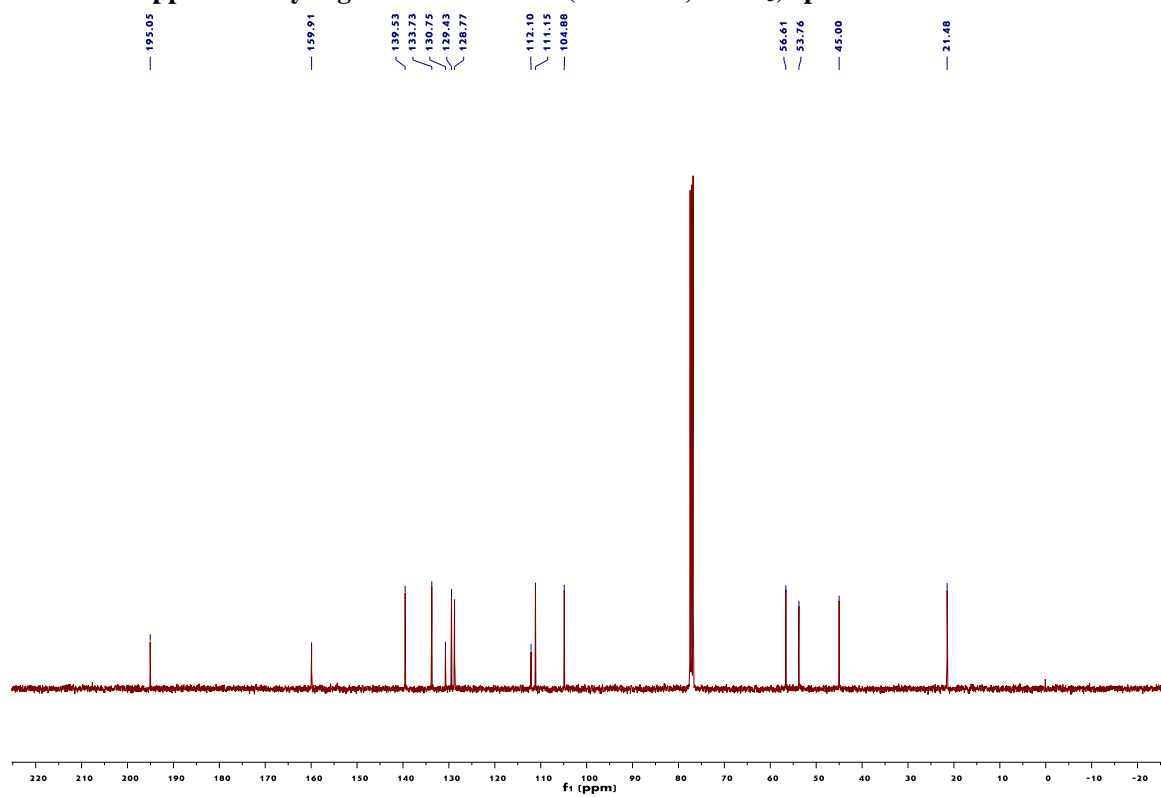

Supplementary Figure 161. <sup>13</sup>C NMR (100 MHz, CDCl<sub>3</sub>) spectrum for 3aca

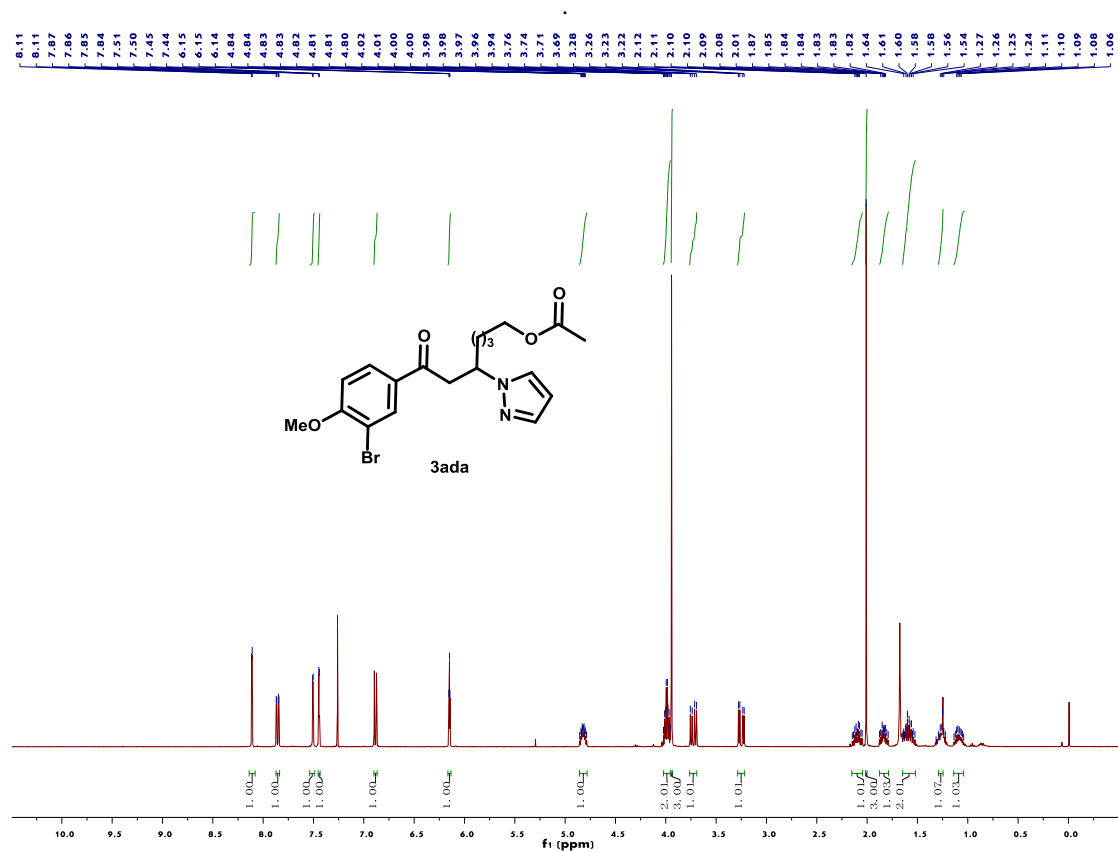

Supplementary Figure 162. <sup>1</sup>H NMR (400 MHz, CDCl<sub>3</sub>) spectrum for 3ada

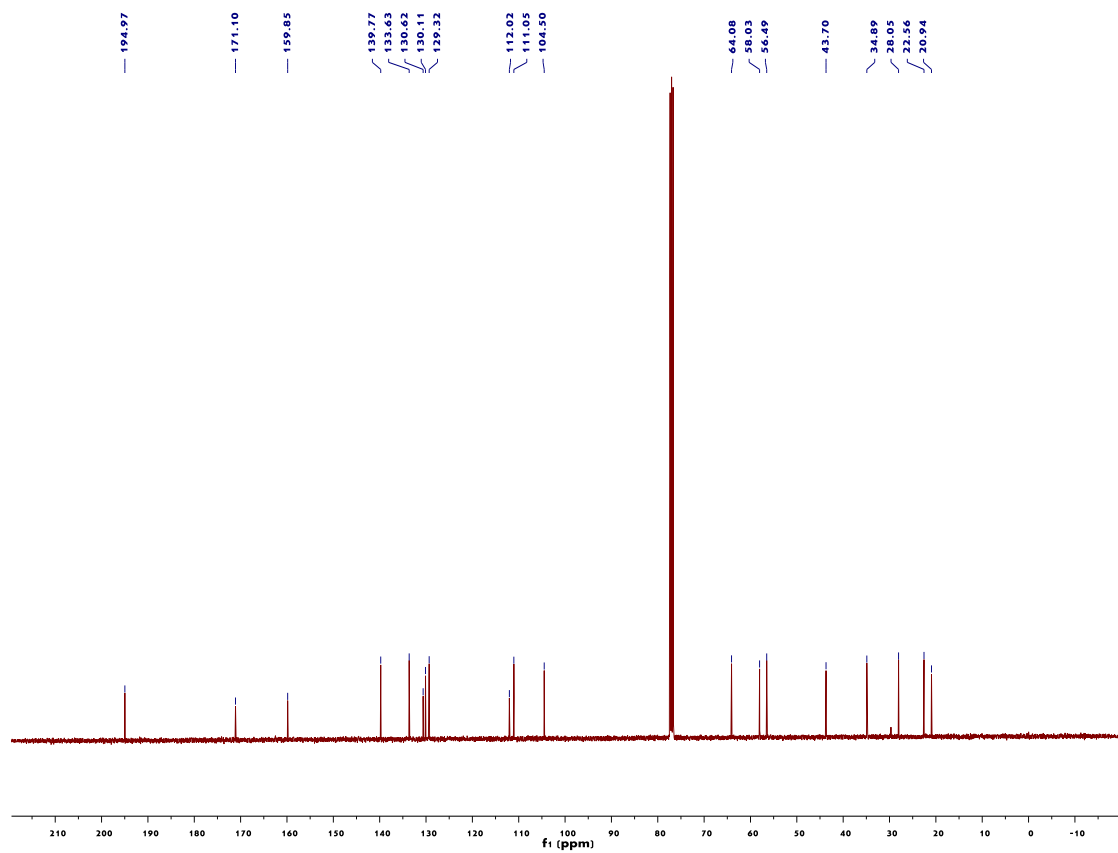

Supplementary Figure 163. <sup>13</sup>C NMR (100 MHz, CDCl<sub>3</sub>) spectrum for 3ada

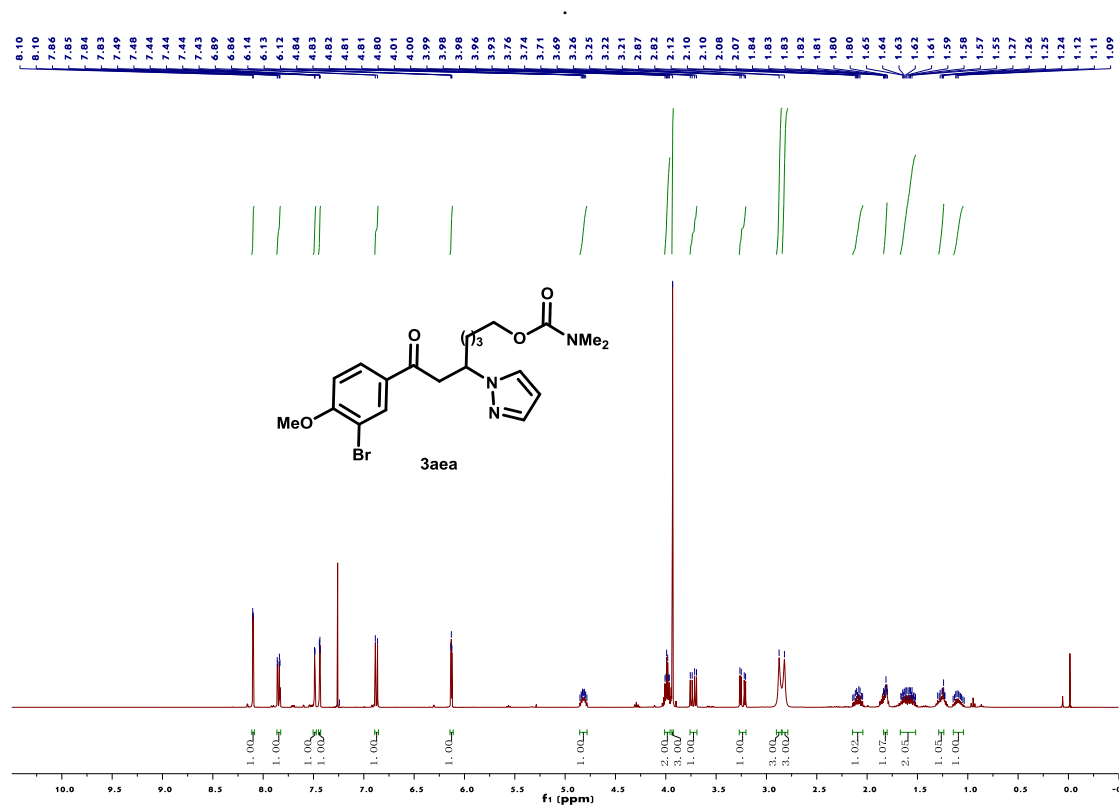

Supplementary Figure 164. <sup>1</sup>H NMR (400 MHz, CDCl<sub>3</sub>) spectrum for 3aea

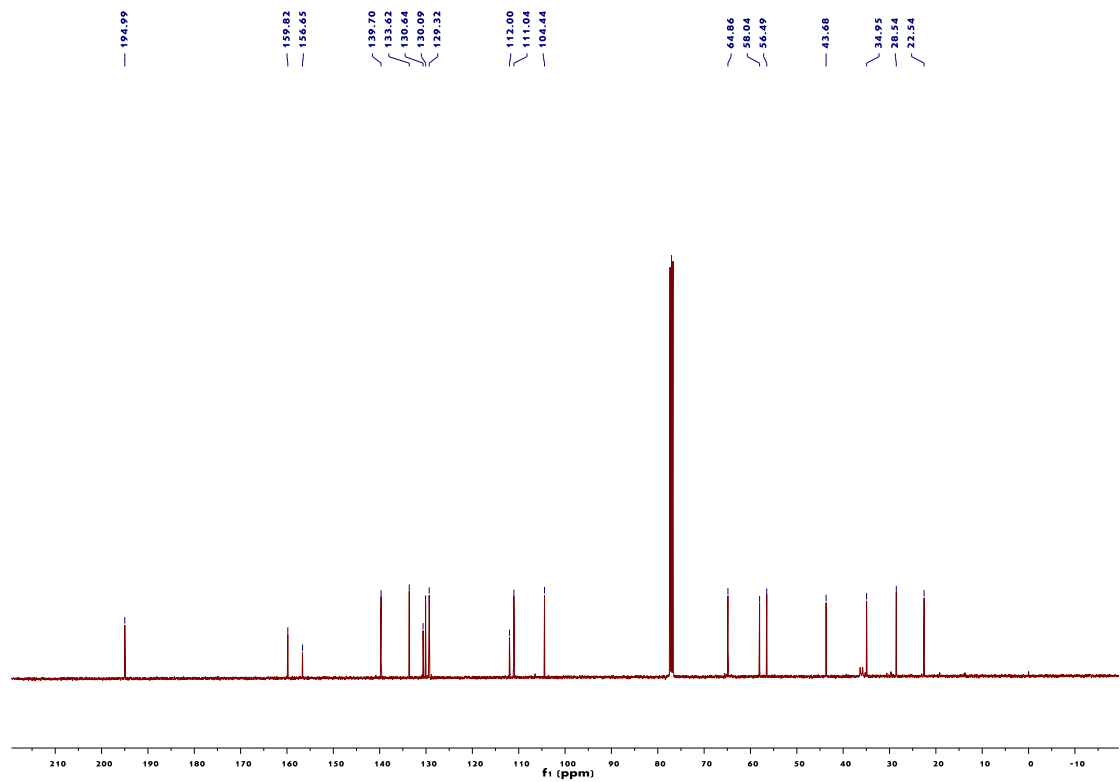

Supplementary Figure 165. <sup>13</sup>C NMR (100 MHz, CDCl<sub>3</sub>) spectrum for 3aea

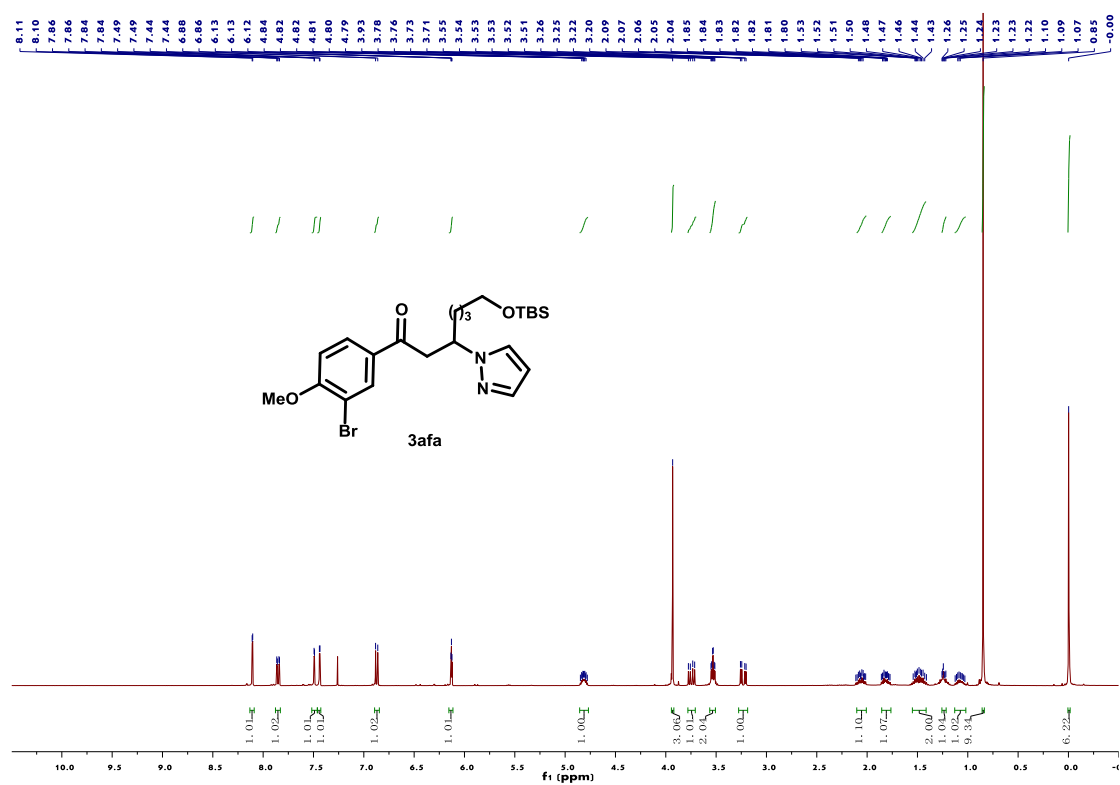

Supplementary Figure 166.  $^1\text{H}$  NMR (400 MHz,  $\text{CDCl}_3$ ) spectrum for 3afa

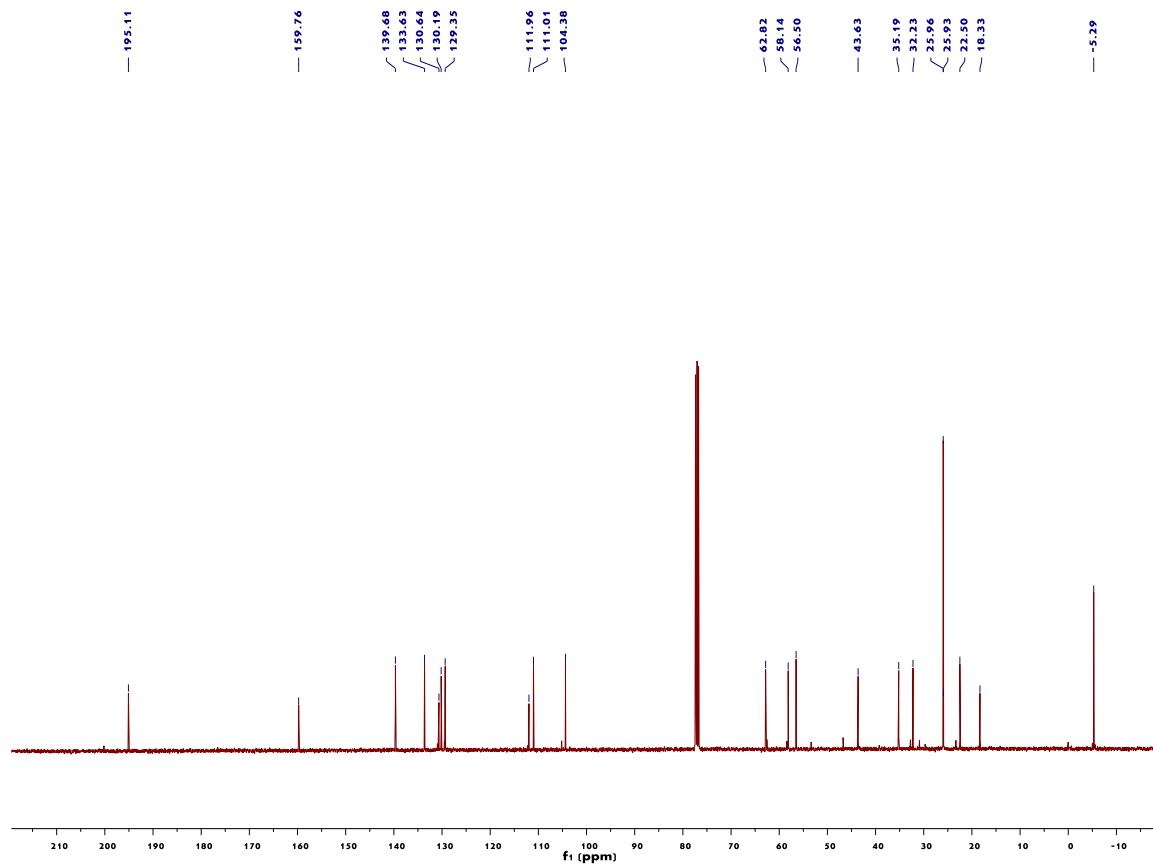

Supplementary Figure 167.  $^{13}\text{C}$  NMR (100 MHz,  $\text{CDCl}_3$ ) spectrum for 3afa

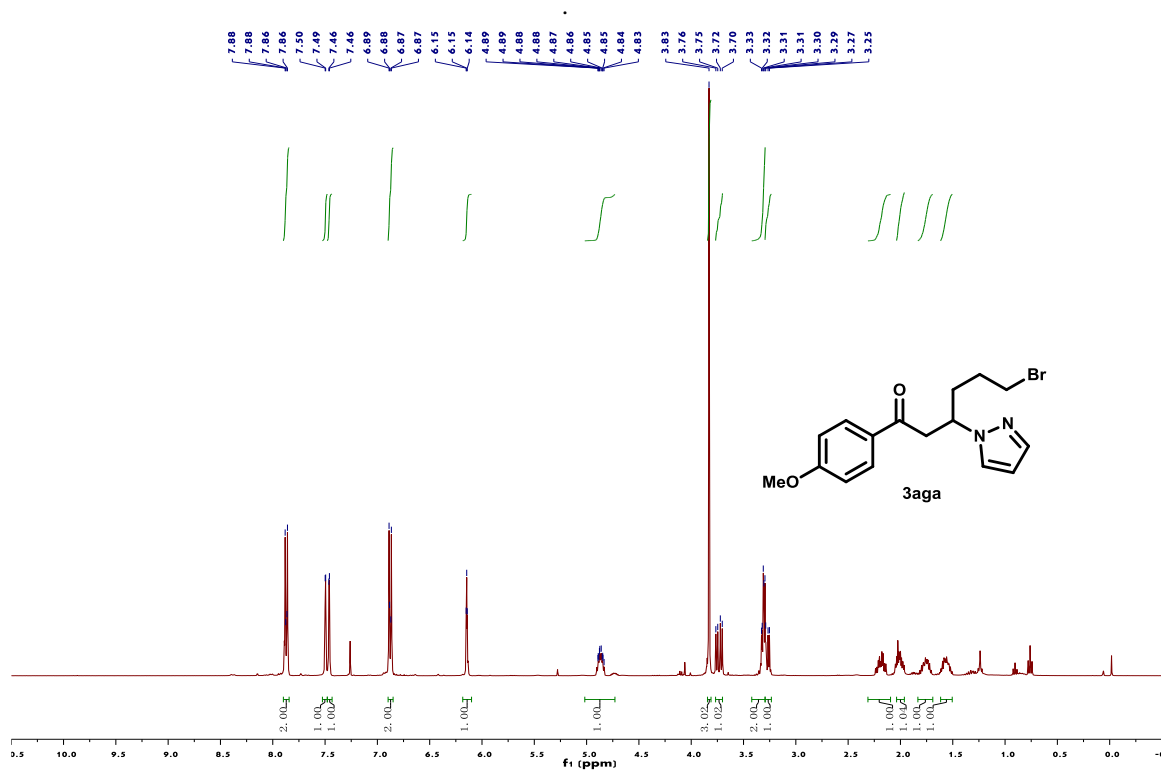

Supplementary Figure 168. <sup>1</sup>H NMR (400 MHz, CDCl<sub>3</sub>) spectrum for 3aga

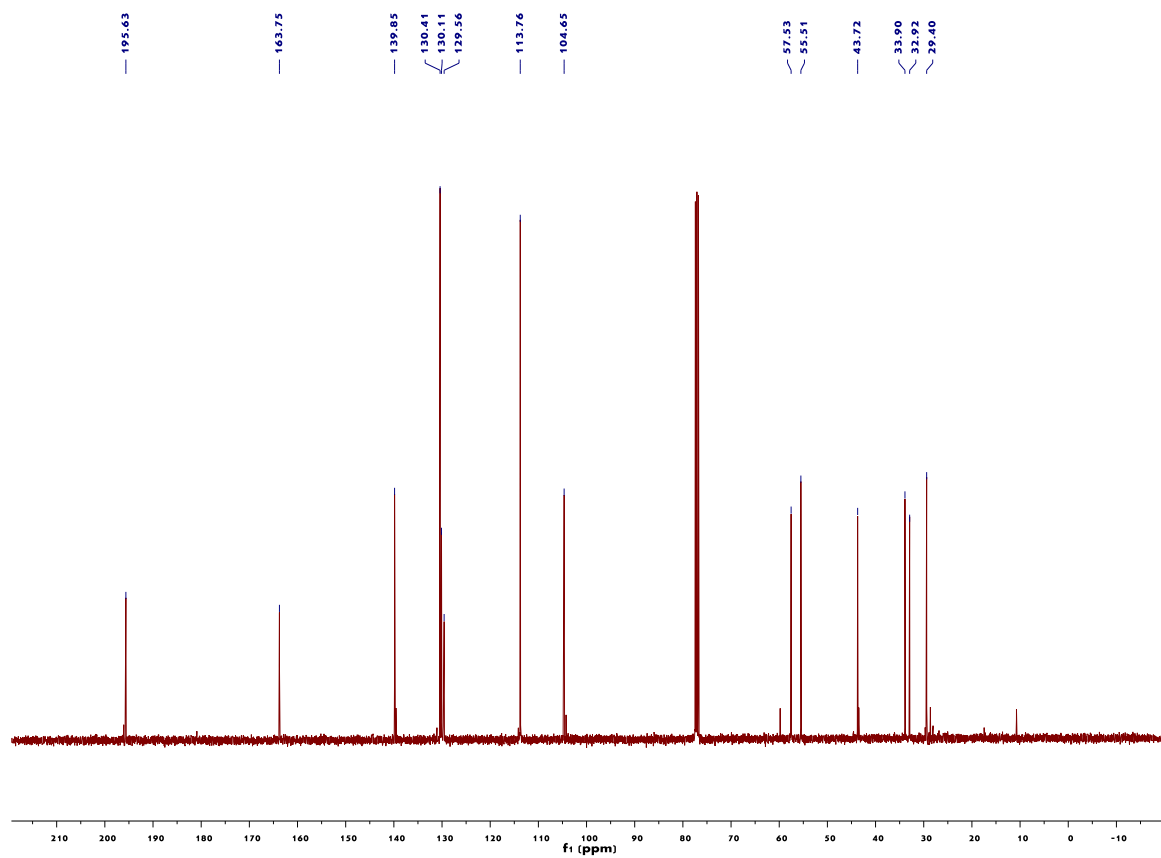

Supplementary Figure 169. <sup>13</sup>C NMR (100 MHz, CDCl<sub>3</sub>) spectrum for 3aga

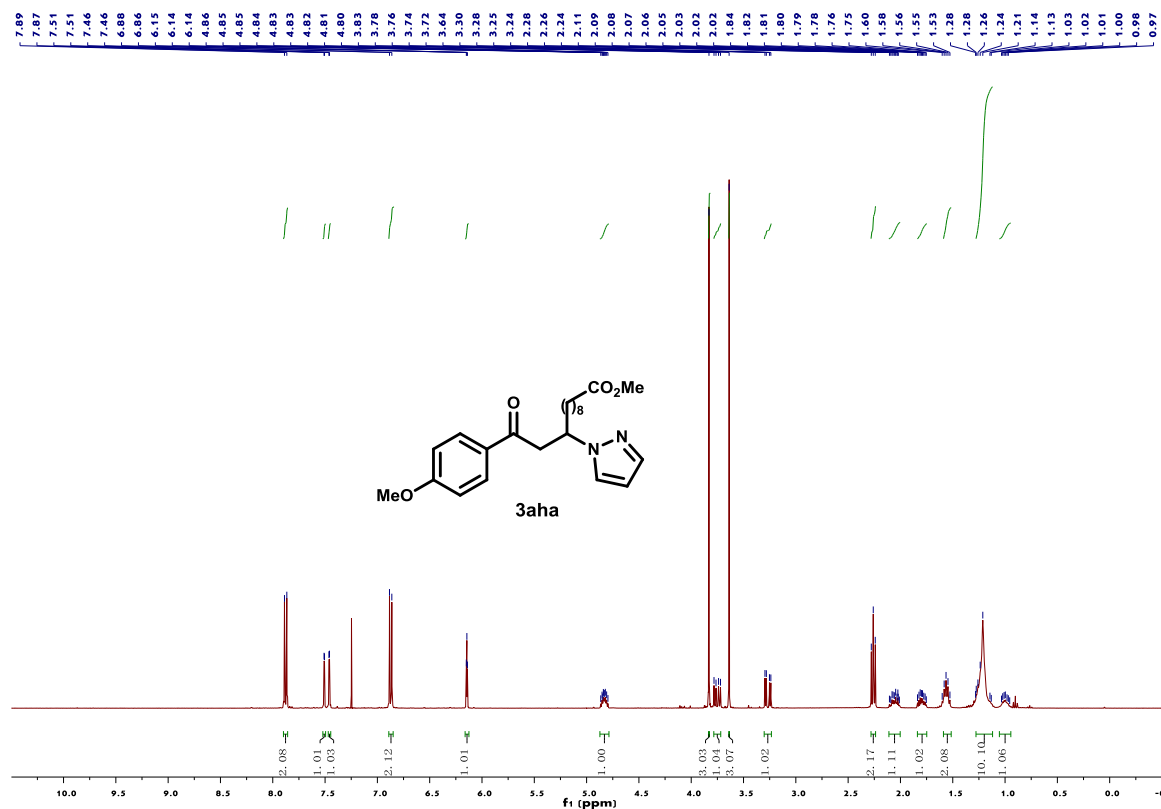

Supplementary Figure 170. <sup>1</sup>H NMR (400 MHz, CDCl<sub>3</sub>) spectrum for 3aha

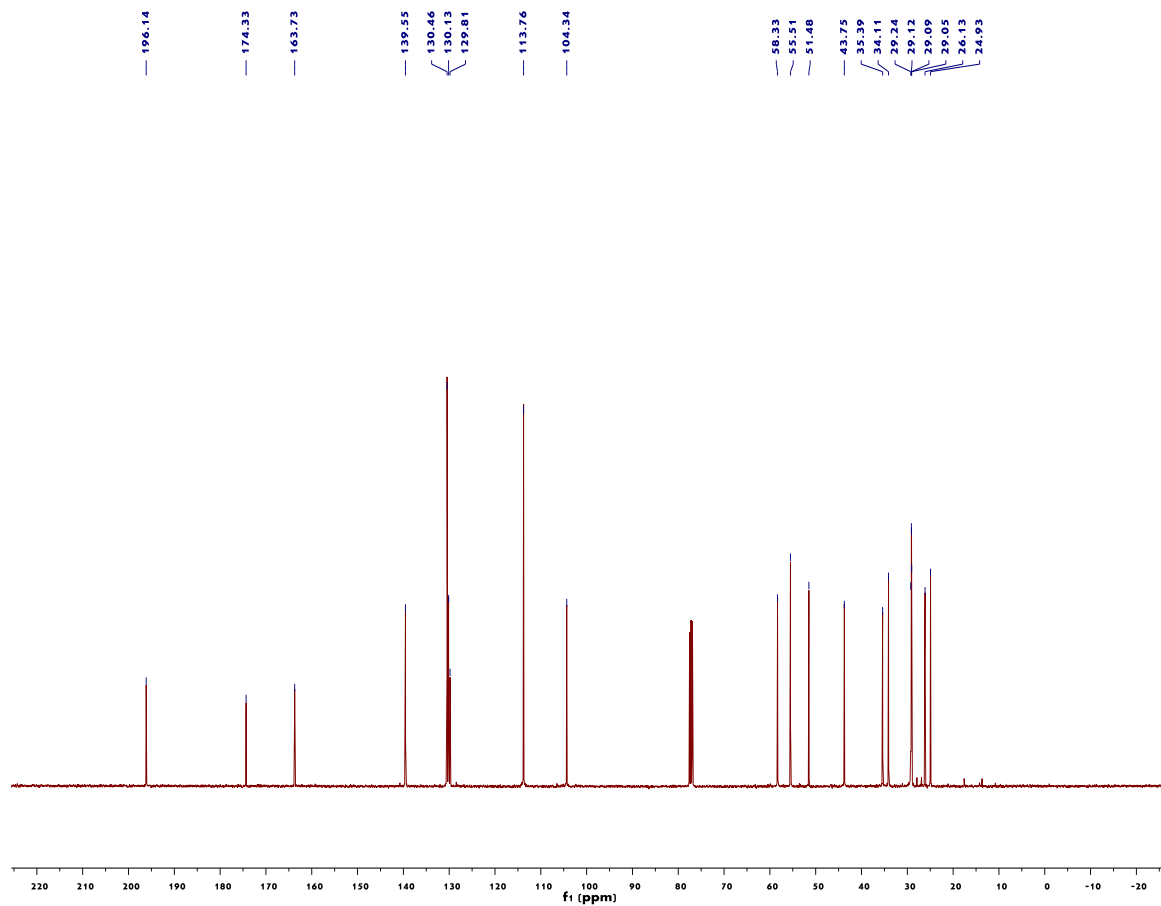

Supplementary Figure 171. <sup>13</sup>C NMR (100 MHz, CDCl<sub>3</sub>) spectrum for 3aha

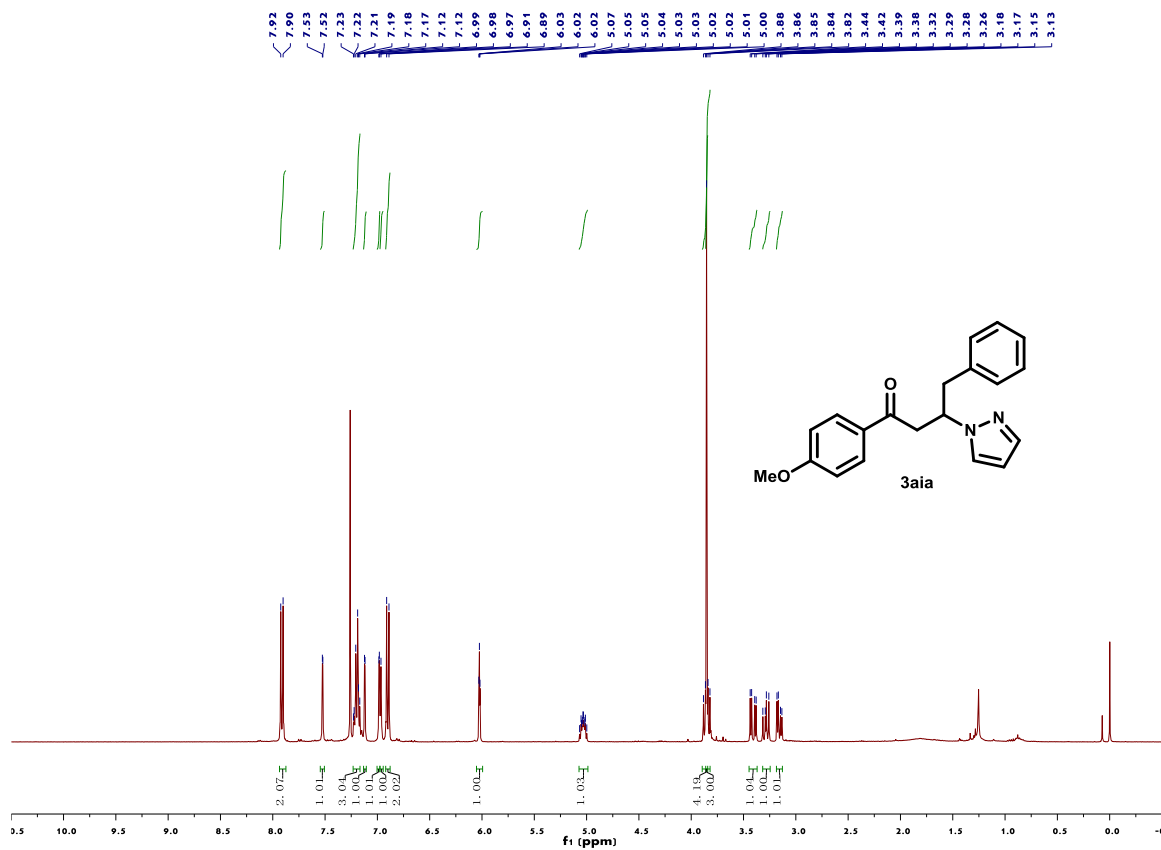

Supplementary Figure 172. <sup>1</sup>H NMR (400 MHz, CDCl<sub>3</sub>) spectrum for 3aia

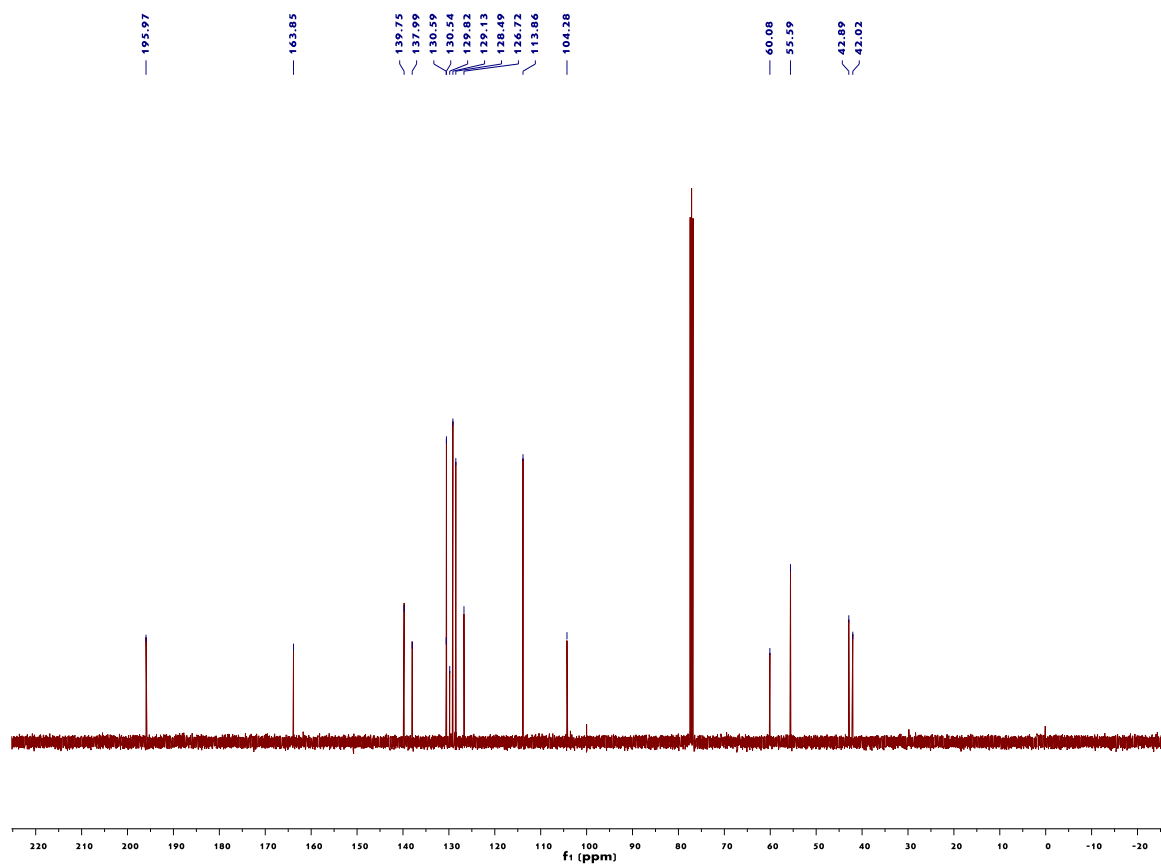

Supplementary Figure 173. <sup>13</sup>C NMR (100 MHz, CDCl<sub>3</sub>) spectrum for 3aia



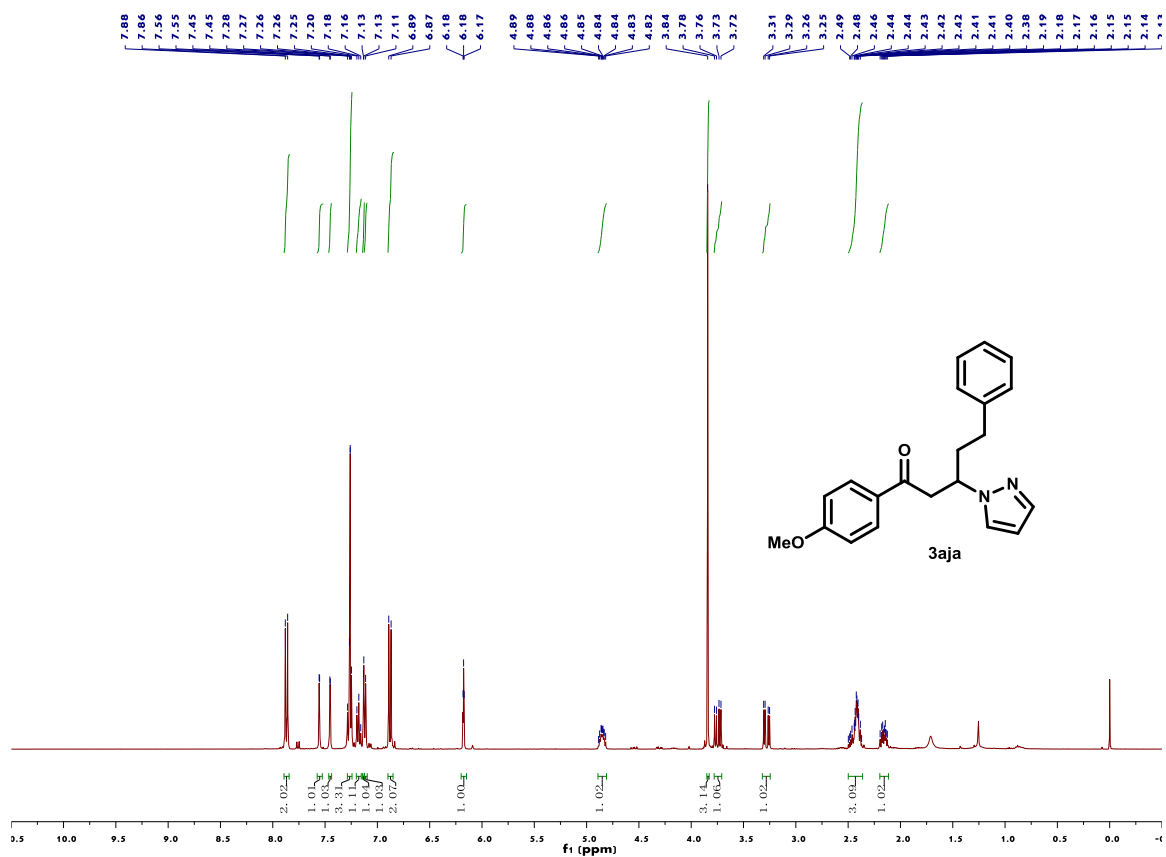

Supplementary Figure 174. <sup>1</sup>H NMR (400 MHz, CDCl<sub>3</sub>) spectrum for 3aja

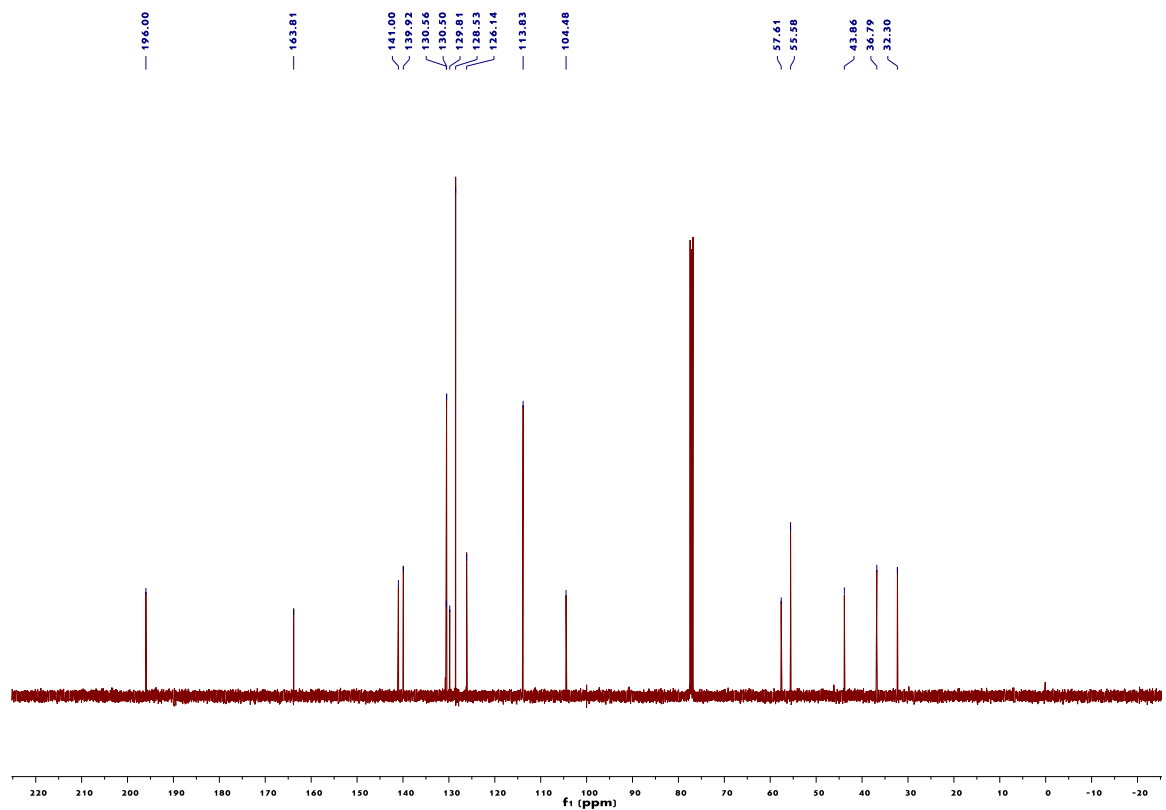

Supplementary Figure 175. <sup>13</sup>C NMR (100 MHz, CDCl<sub>3</sub>) spectrum for 3aja

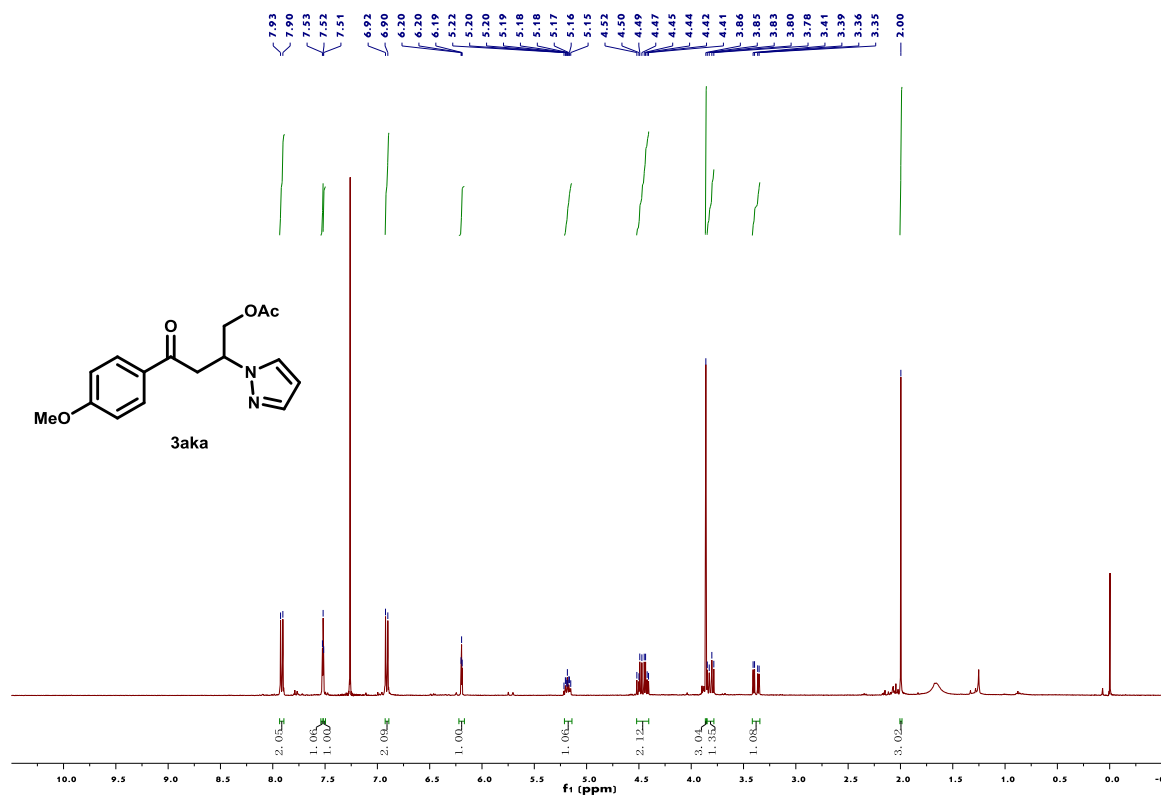

Supplementary Figure 176. <sup>1</sup>H NMR (400 MHz, CDCl<sub>3</sub>) spectrum for 3aka

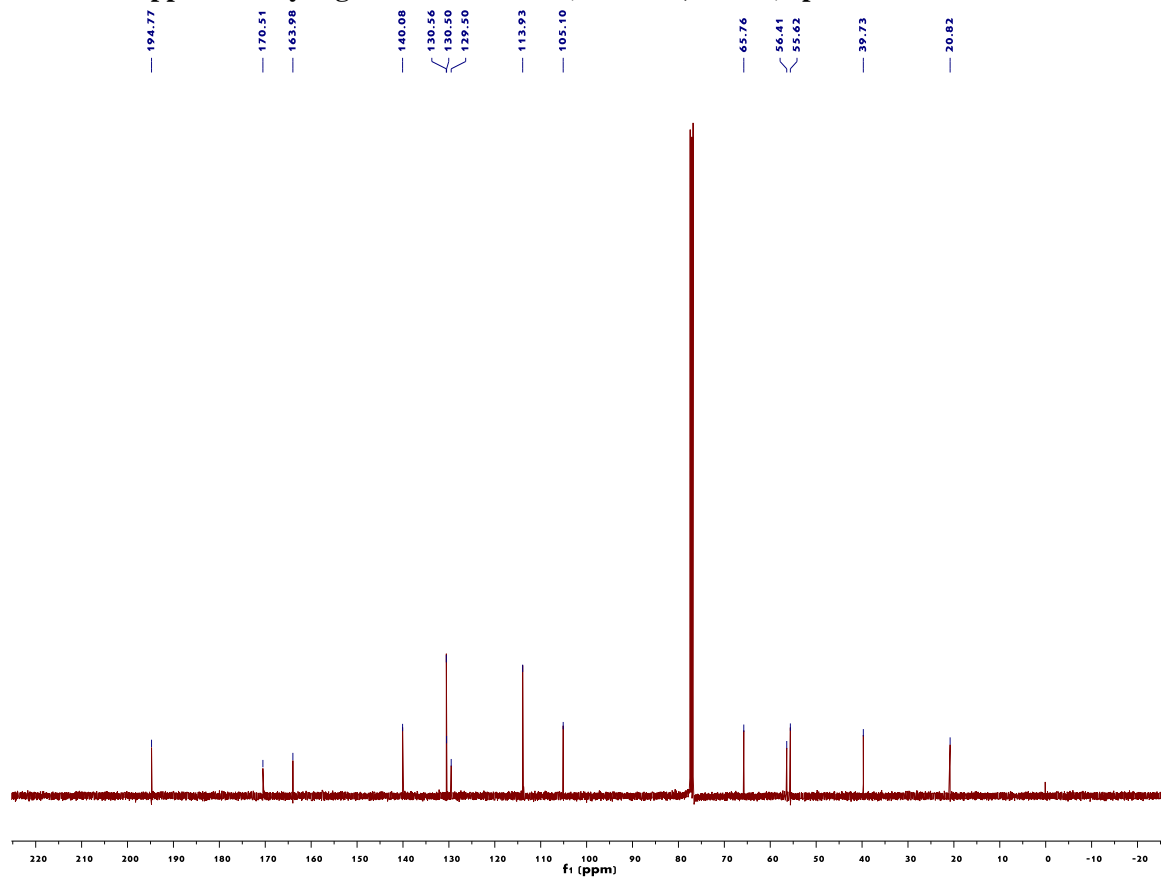

Supplementary Figure 177. <sup>13</sup>C NMR (100 MHz, CDCl<sub>3</sub>) spectrum for 3aka

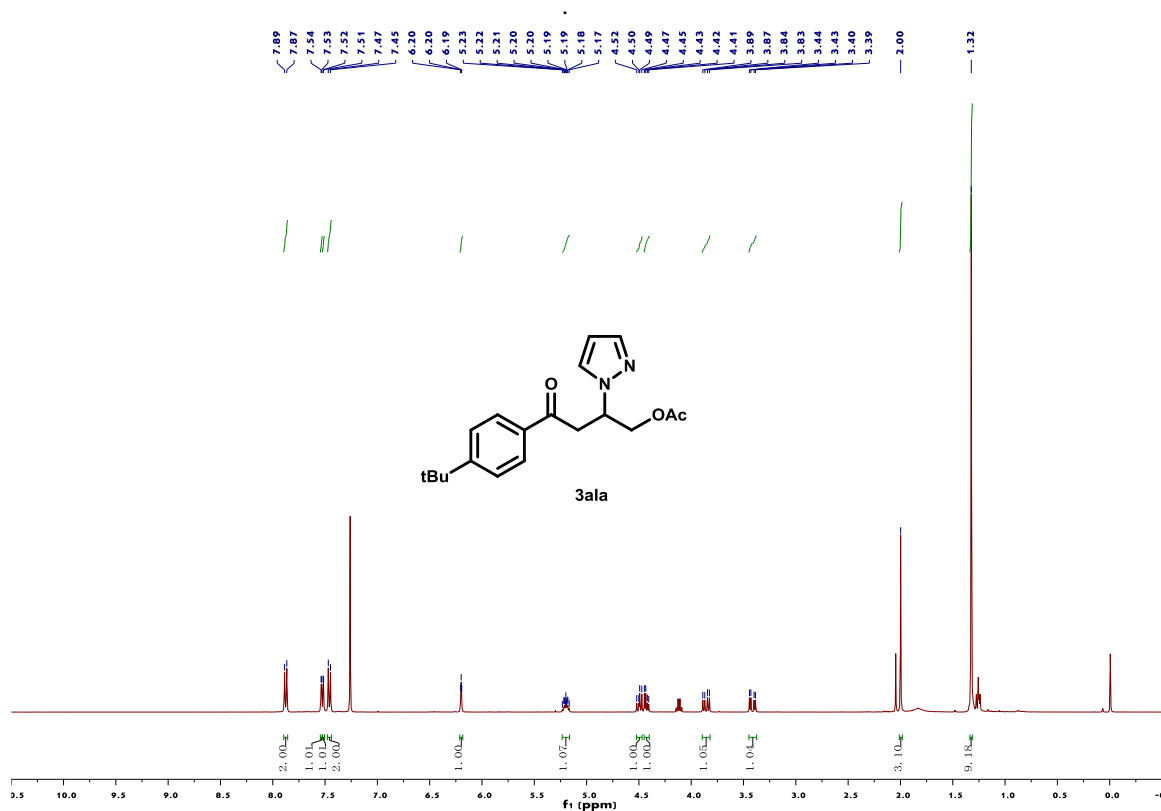

Supplementary Figure 178. <sup>1</sup>H NMR (400 MHz, CDCl<sub>3</sub>) spectrum for 3ala

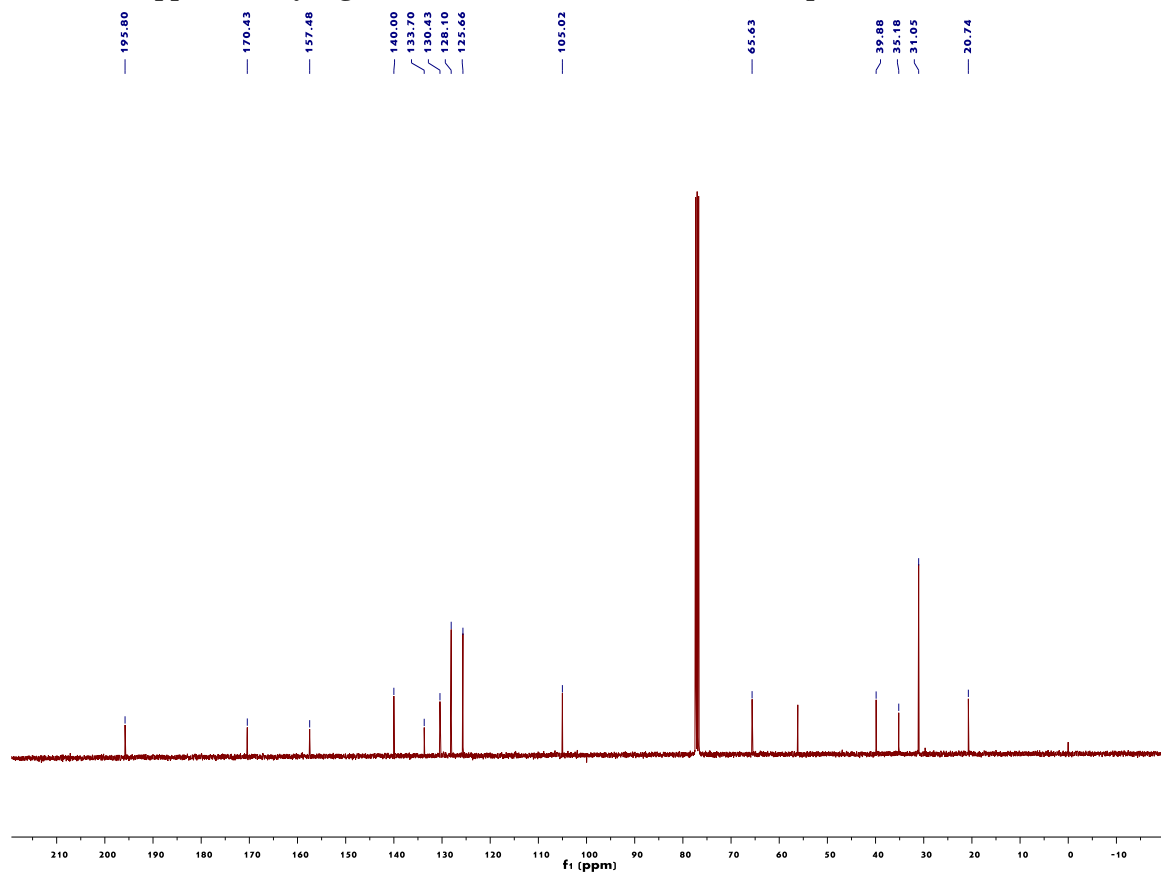

Supplementary Figure 179. <sup>13</sup>C NMR (100 MHz, CDCl<sub>3</sub>) spectrum for 3ala

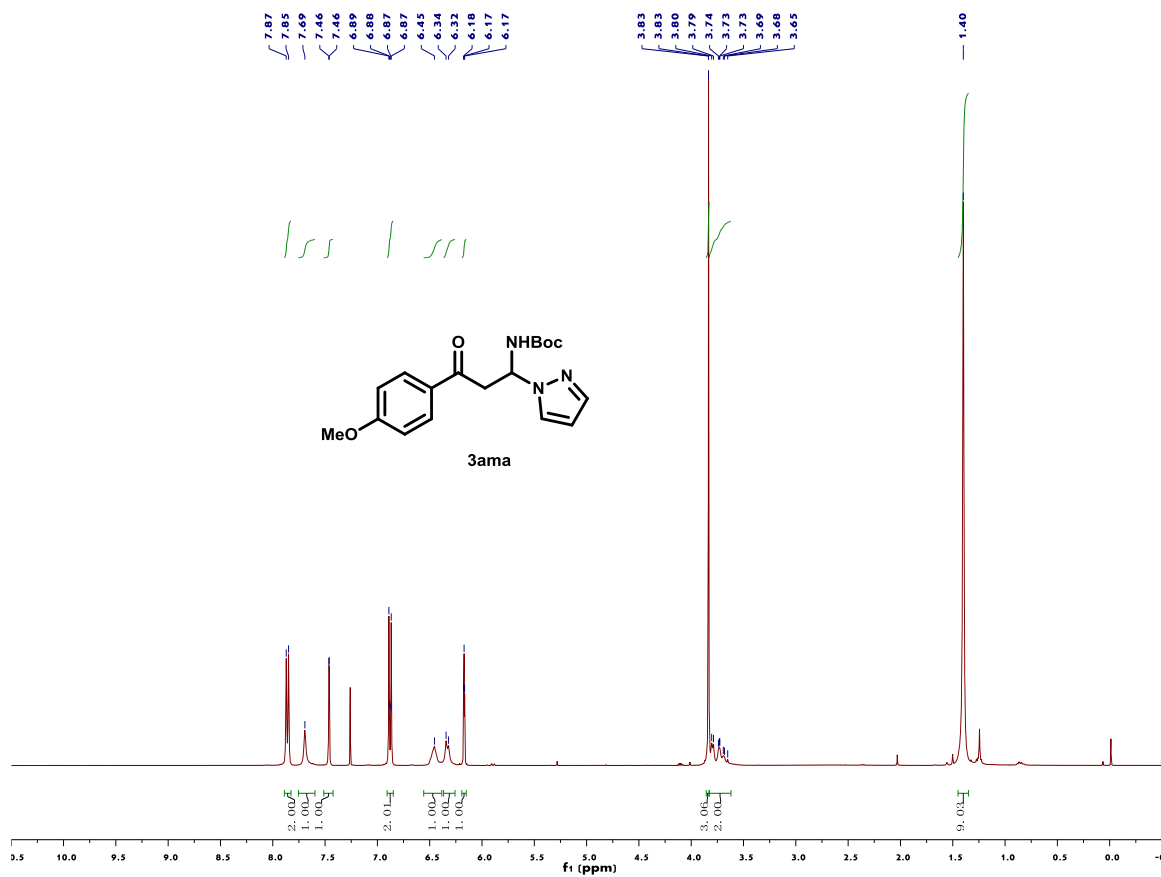

Supplementary Figure 180. <sup>1</sup>H NMR (400 MHz, CDCl<sub>3</sub>) spectrum for 3ama

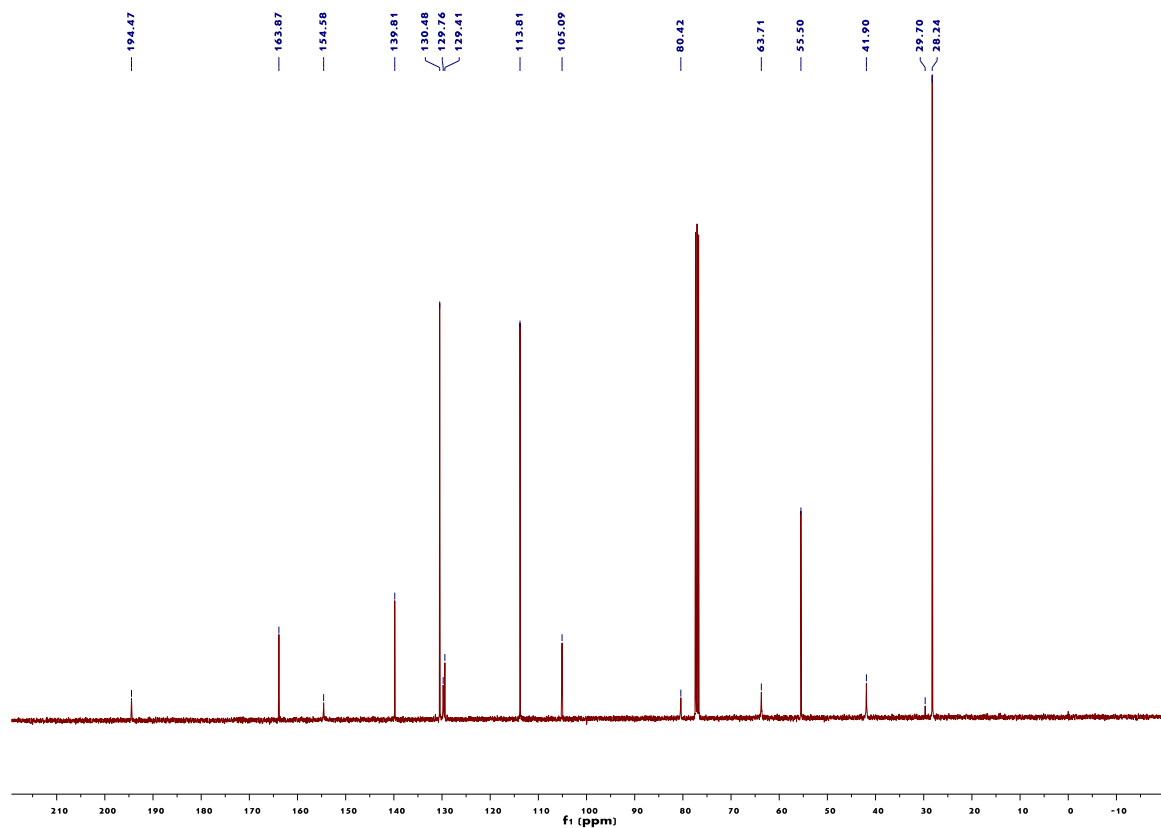

Supplementary Figure 181. <sup>13</sup>C NMR (100 MHz, CDCl<sub>3</sub>) spectrum for 3ama

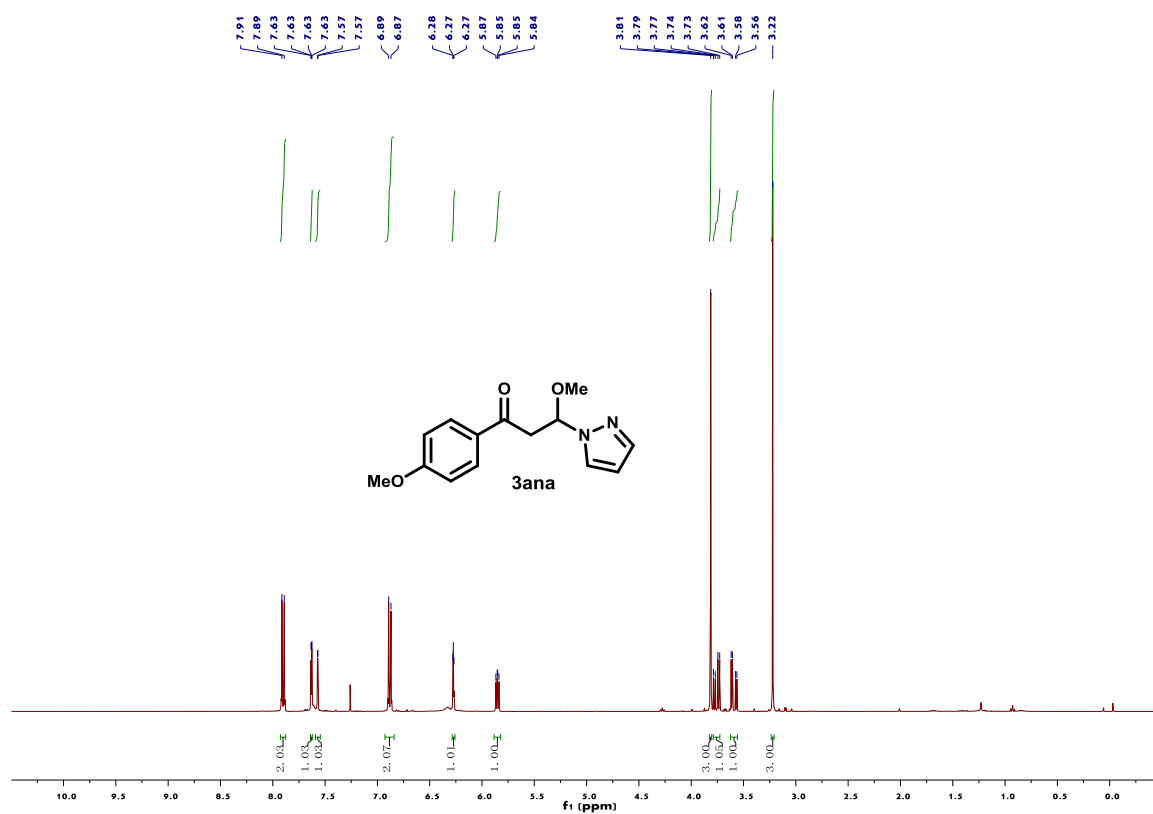

Supplementary Figure 182. <sup>1</sup>H NMR (400 MHz, CDCl<sub>3</sub>) spectrum for 3ana

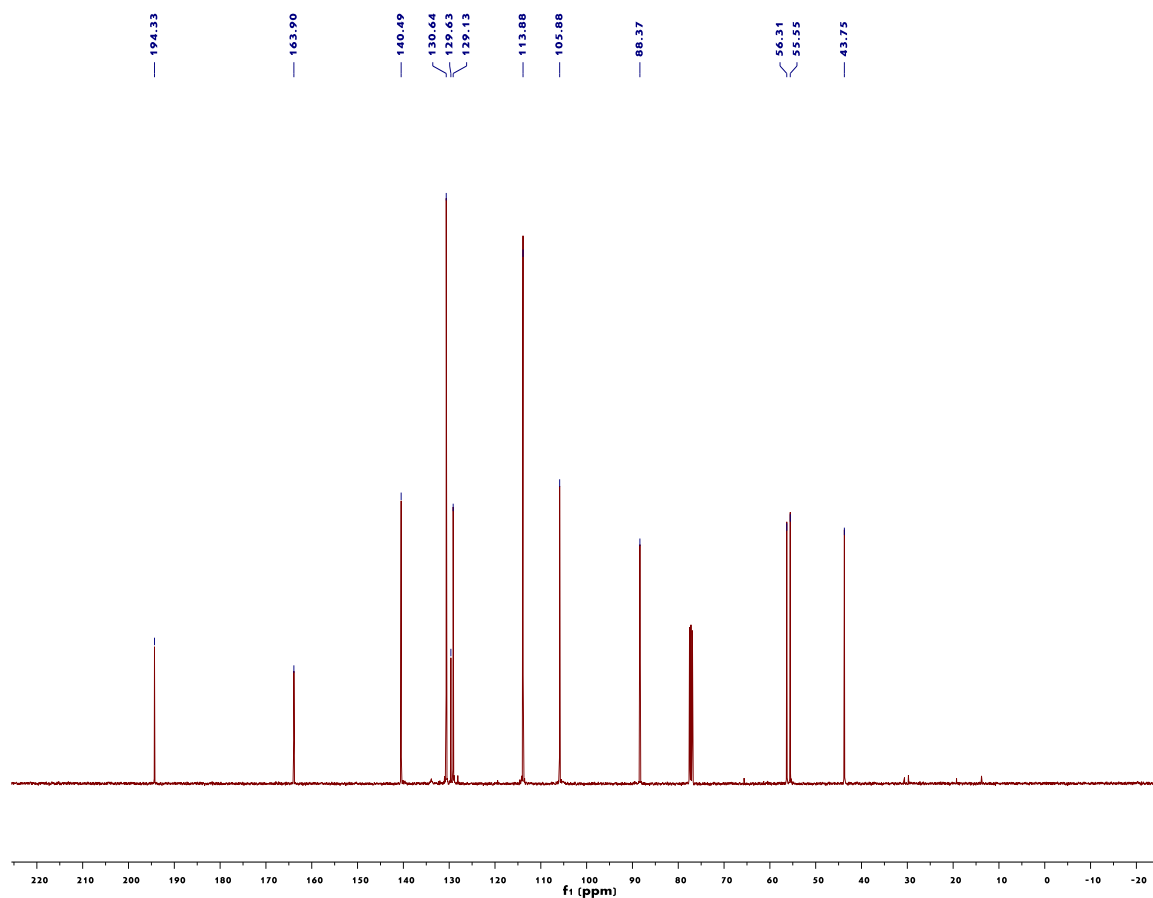

Supplementary Figure 183. <sup>13</sup>C NMR (100 MHz, CDCl<sub>3</sub>) spectrum for 3ana

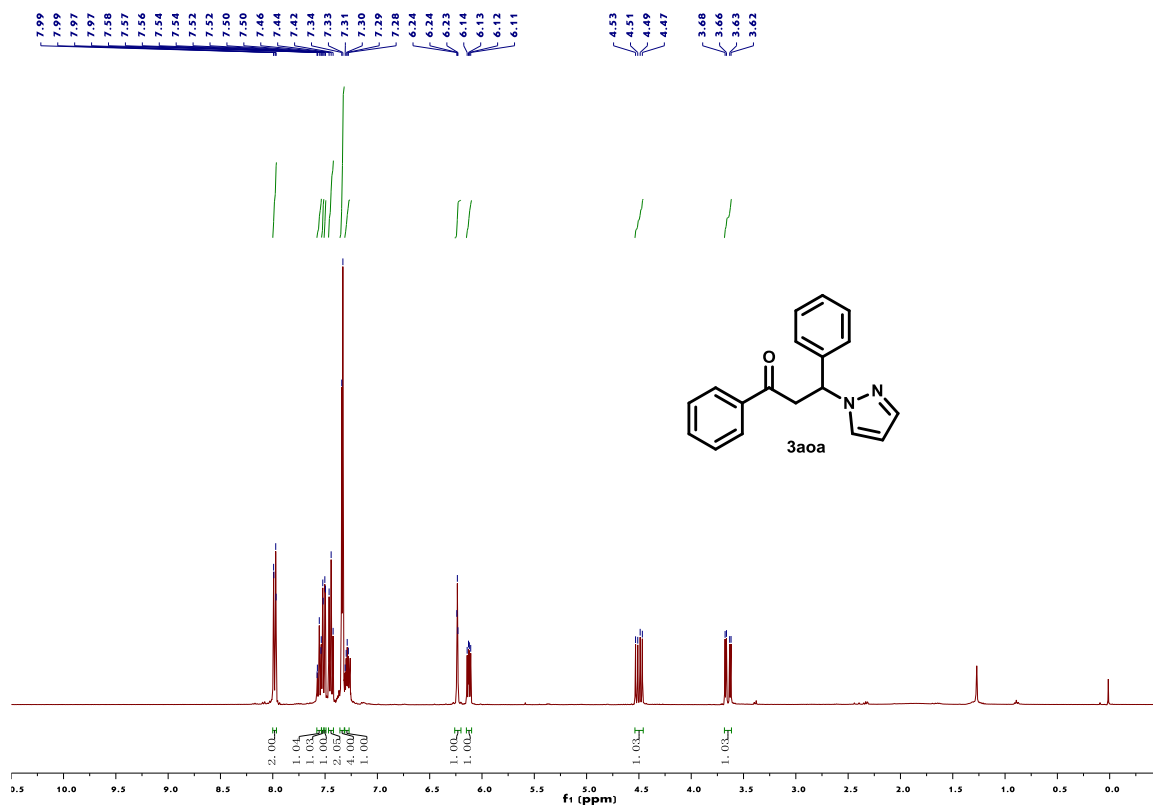

Supplementary Figure 184. <sup>1</sup>H NMR (400 MHz, CDCl<sub>3</sub>) spectrum for 3aoa

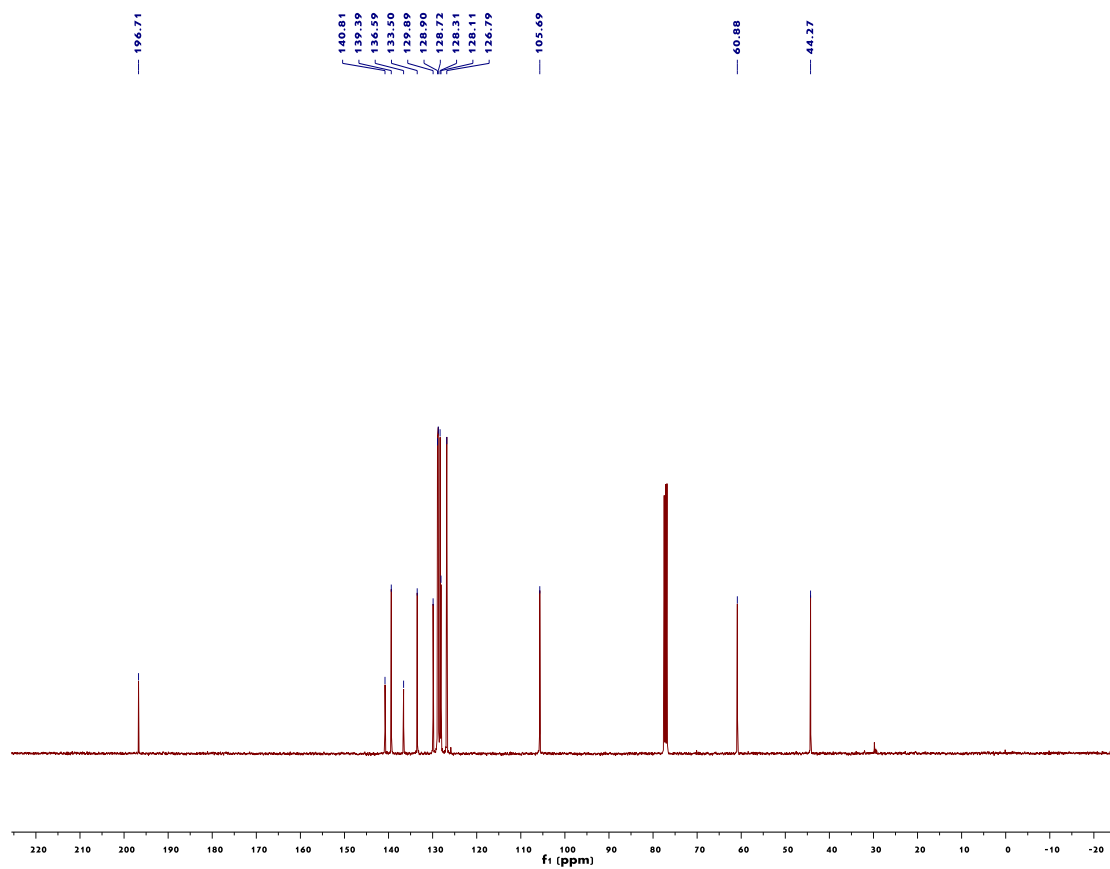

Supplementary Figure 185. <sup>13</sup>C NMR (100 MHz, CDCl<sub>3</sub>) spectrum for 3aoa



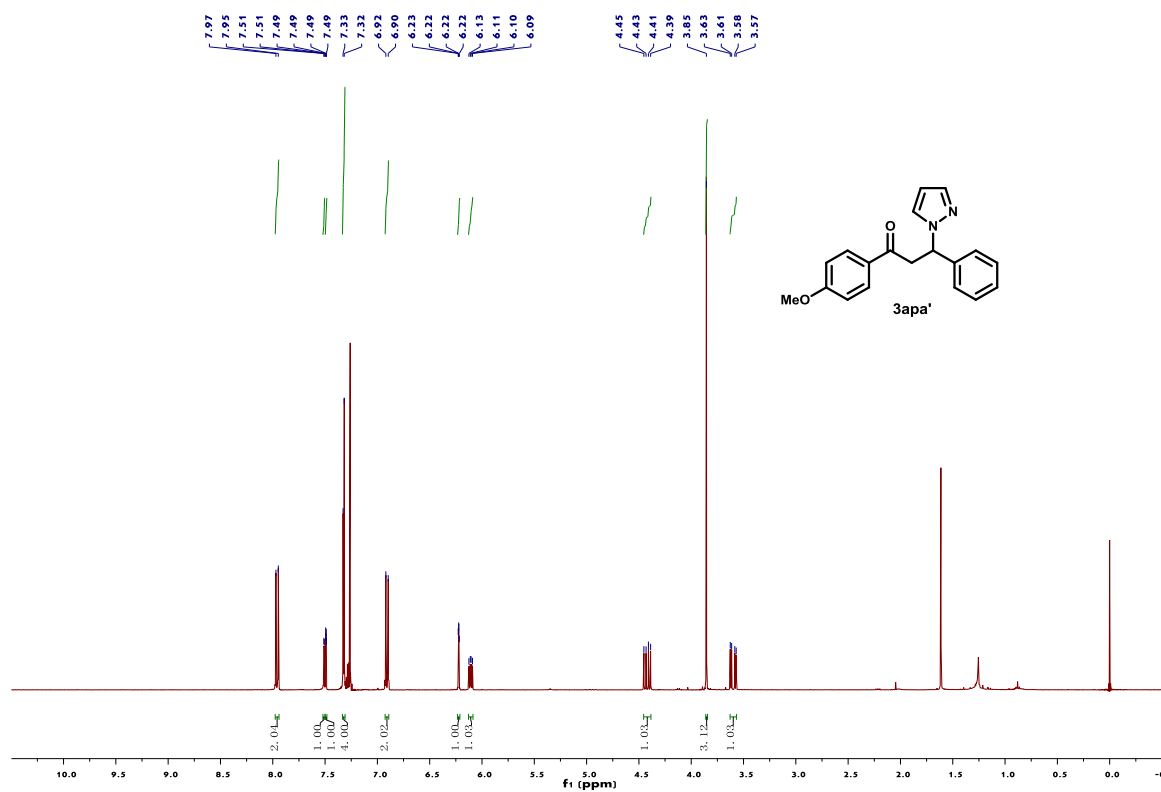

Supplementary Figure 188.  $^1\text{H}$  NMR (400 MHz,  $\text{CDCl}_3$ ) spectrum for 3apa'

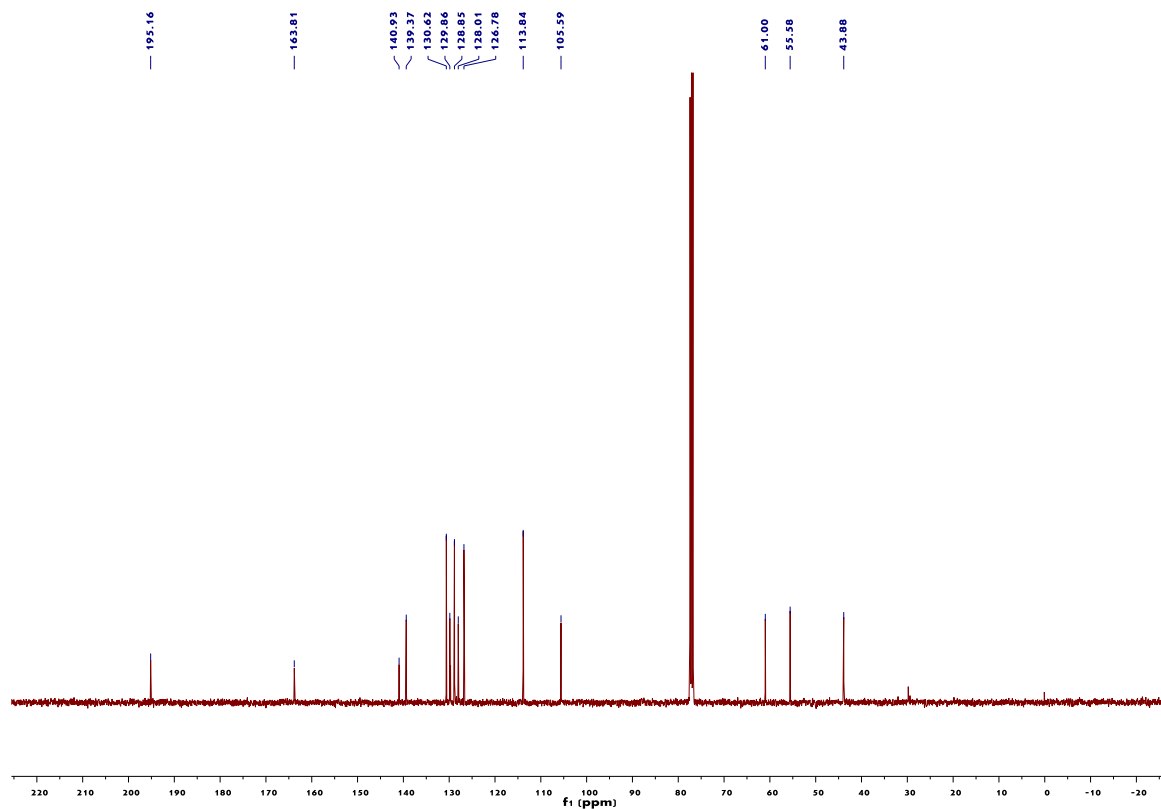

Supplementary Figure 189.  $^{13}\text{C}$  NMR (100 MHz,  $\text{CDCl}_3$ ) spectrum for 3apa'



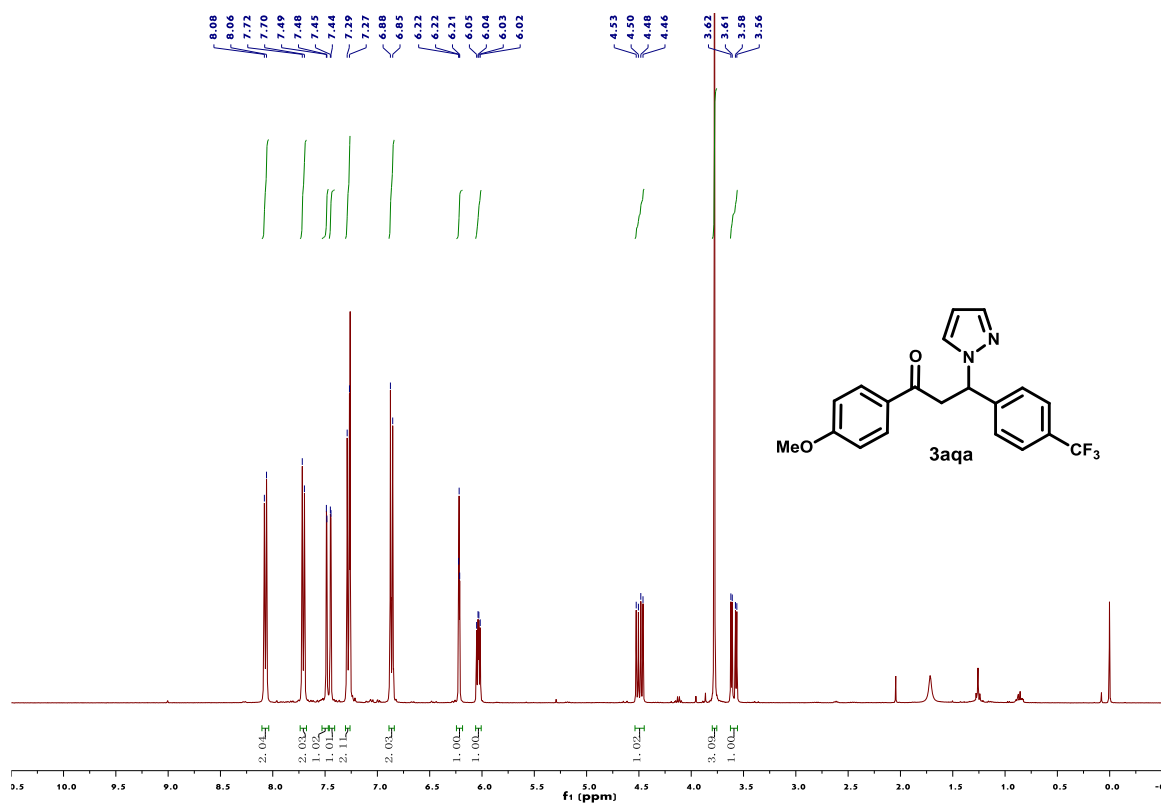

Supplementary Figure 190. <sup>1</sup>H NMR (400 MHz, CDCl<sub>3</sub>) spectrum for 3aqa

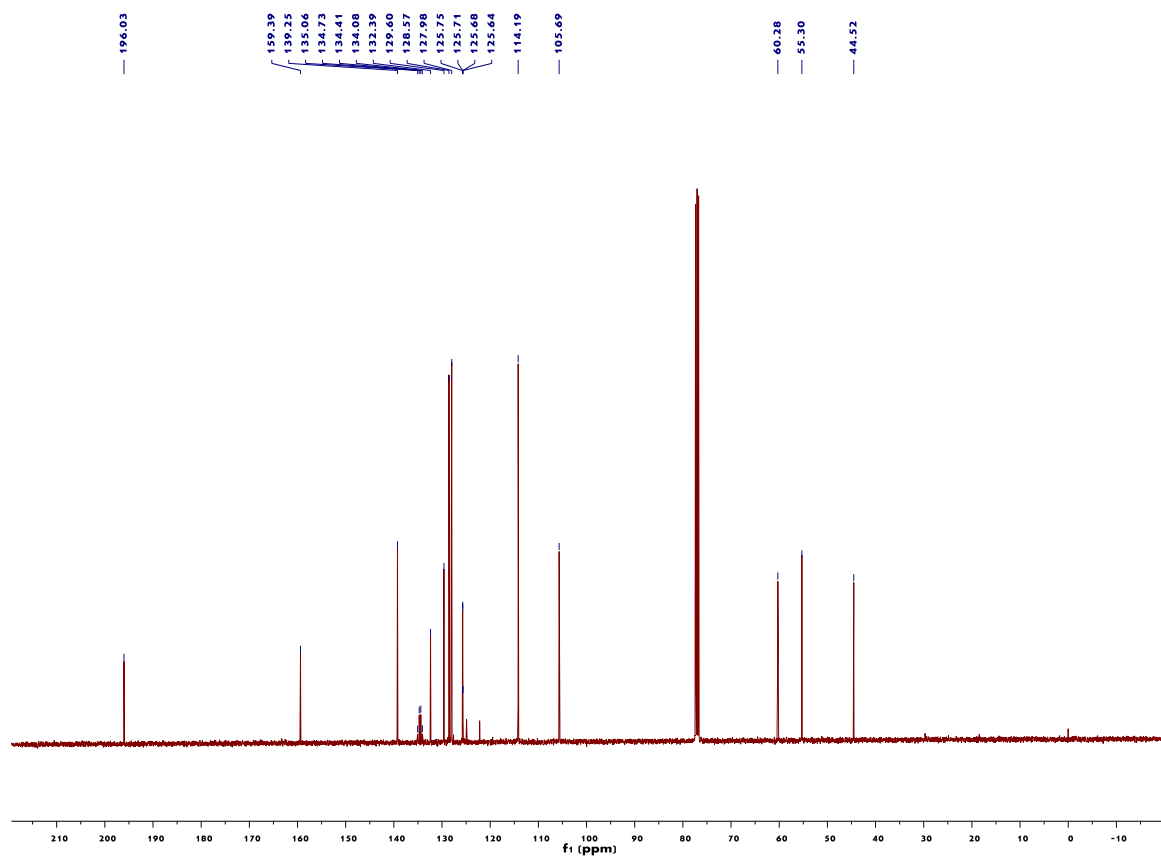

Supplementary Figure 191. <sup>13</sup>C NMR (100 MHz, CDCl<sub>3</sub>) spectrum for 3aqa

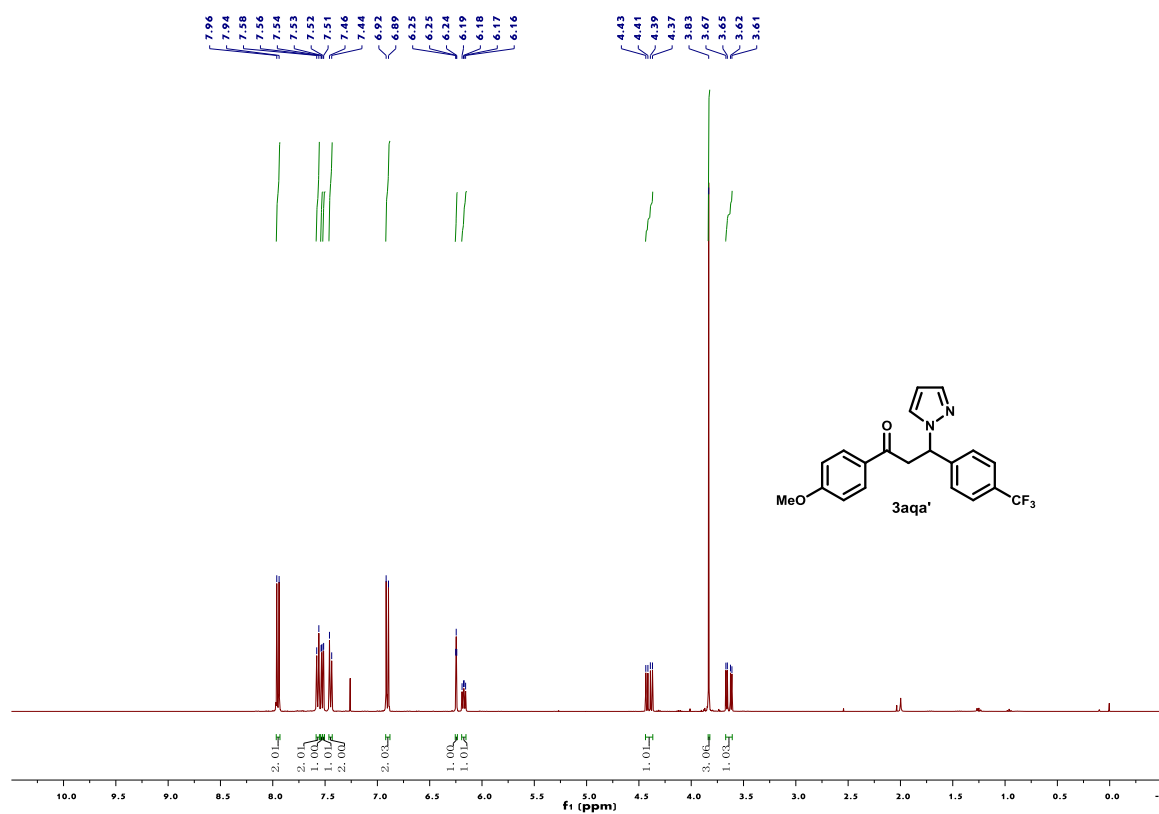

Supplementary Figure 192. <sup>1</sup>H NMR (400 MHz, CDCl<sub>3</sub>) spectrum for 3aqa'

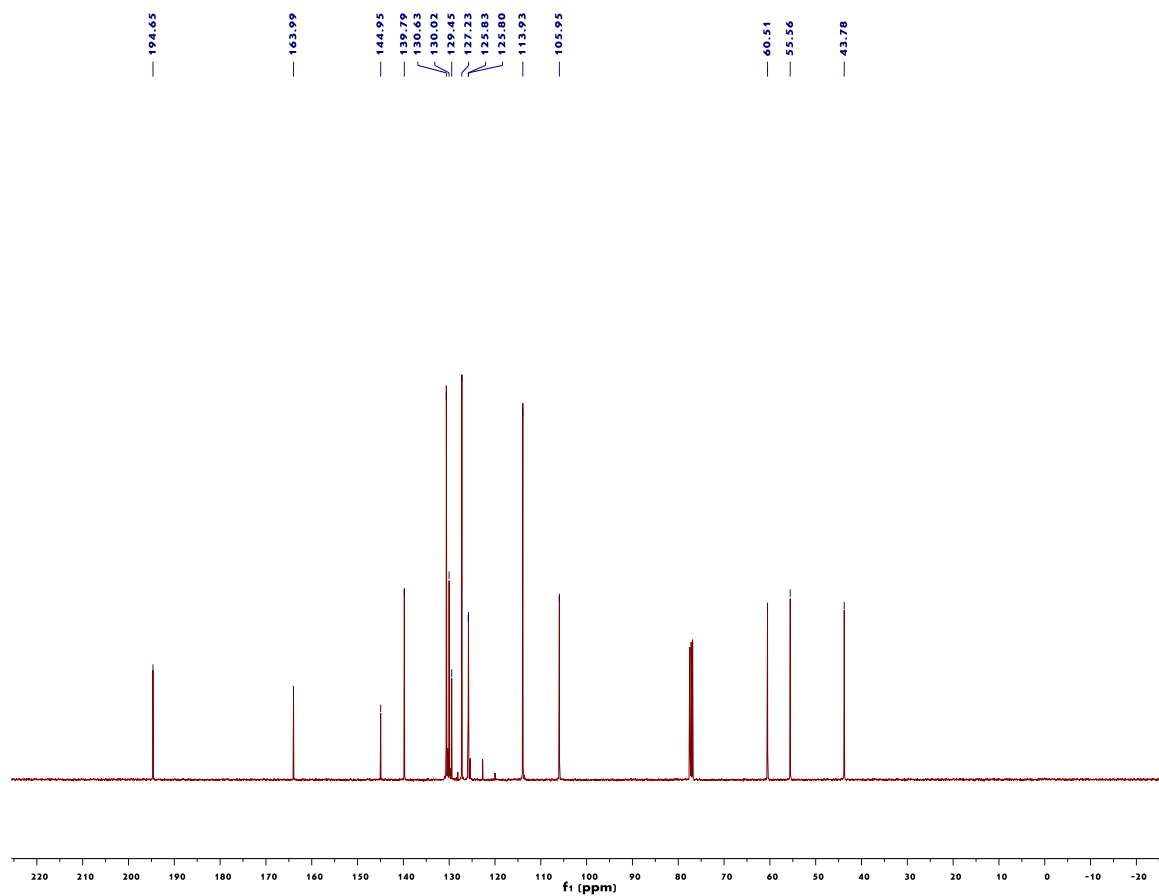

Supplementary Figure 193. <sup>13</sup>C NMR (100 MHz, CDCl<sub>3</sub>) spectrum for 3aqa'

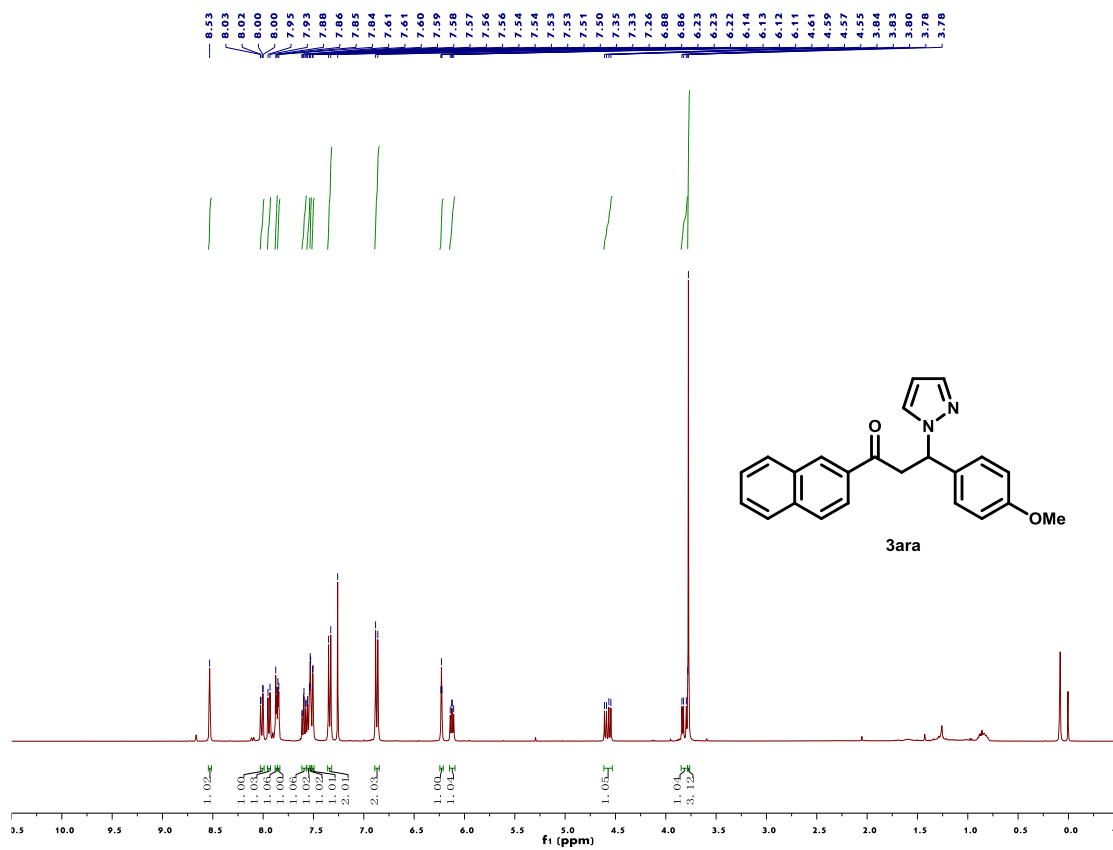

Supplementary Figure 194. <sup>1</sup>H NMR (400 MHz, CDCl<sub>3</sub>) spectrum for 3ara

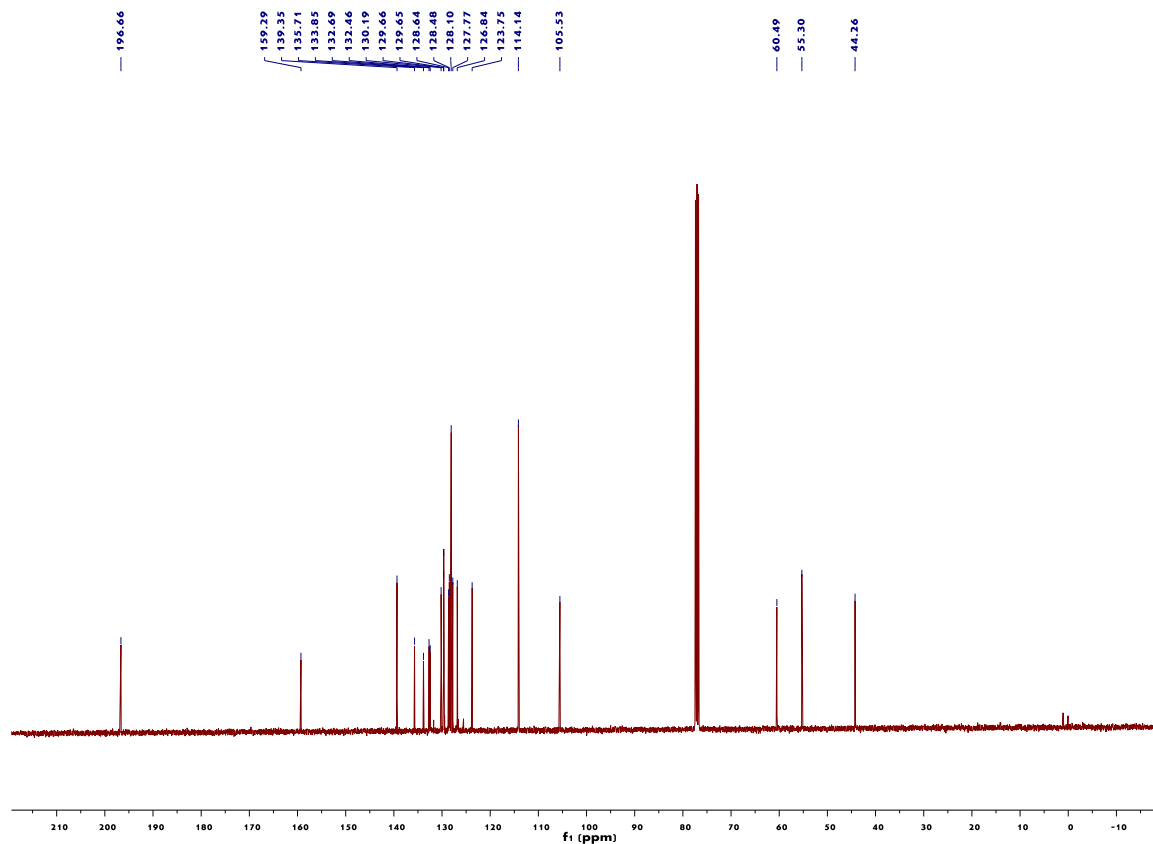

Supplementary Figure 195. <sup>13</sup>C NMR (100 MHz, CDCl<sub>3</sub>) spectrum for 3ara

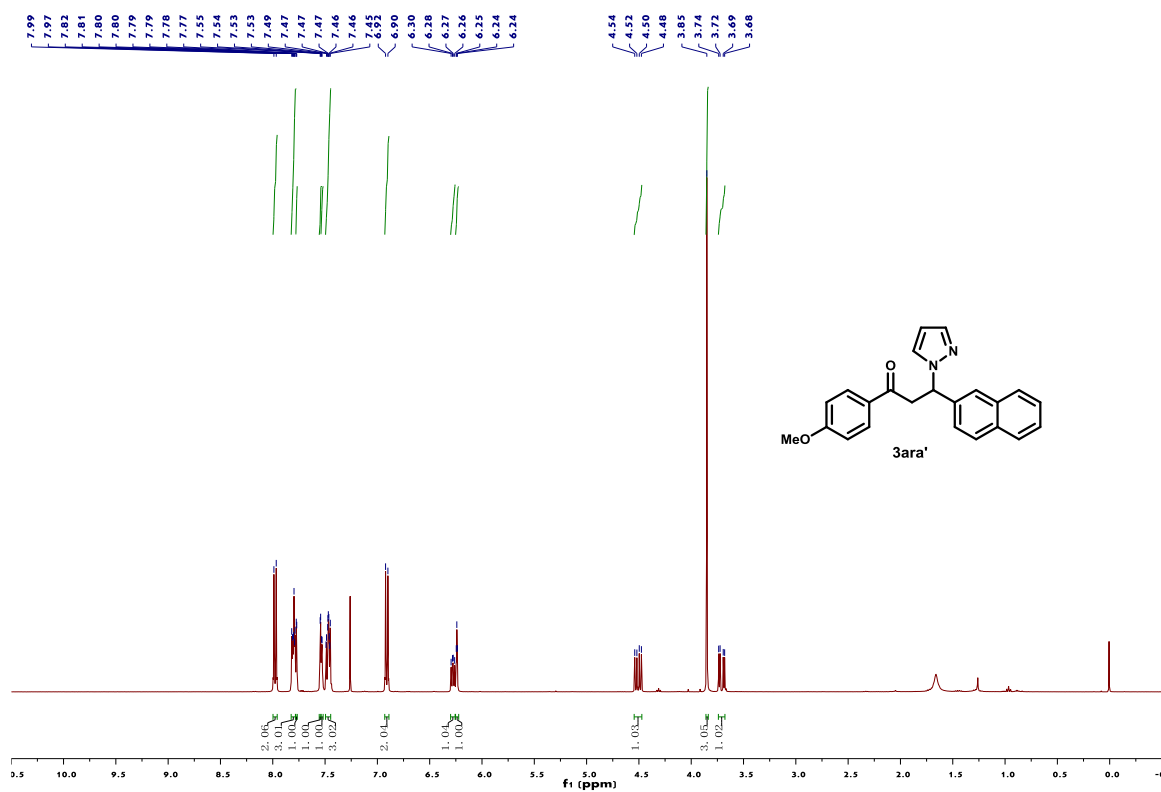

Supplementary Figure 196. <sup>1</sup>H NMR (400 MHz, CDCl<sub>3</sub>) spectrum for 3ara'

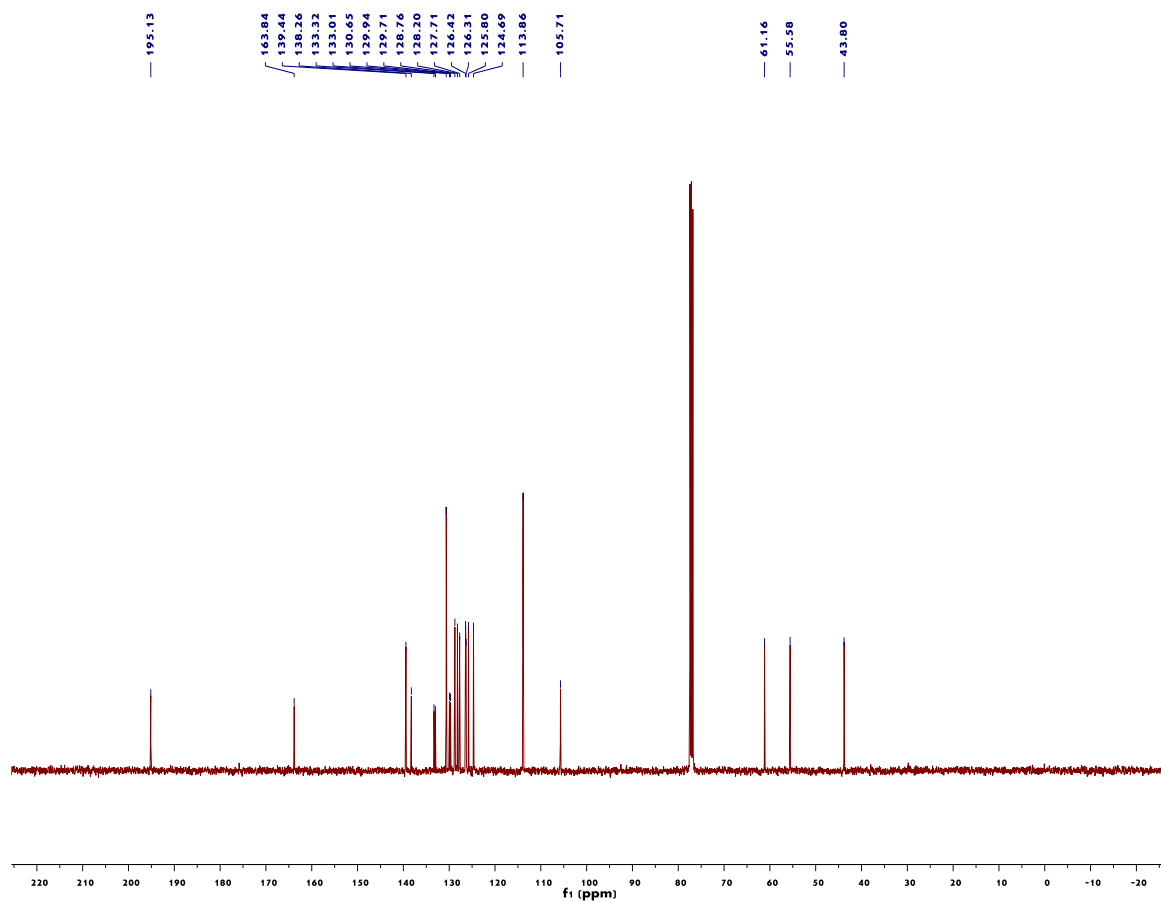

Supplementary Figure 197. <sup>13</sup>C NMR (100 MHz, CDCl<sub>3</sub>) spectrum for 3ara'

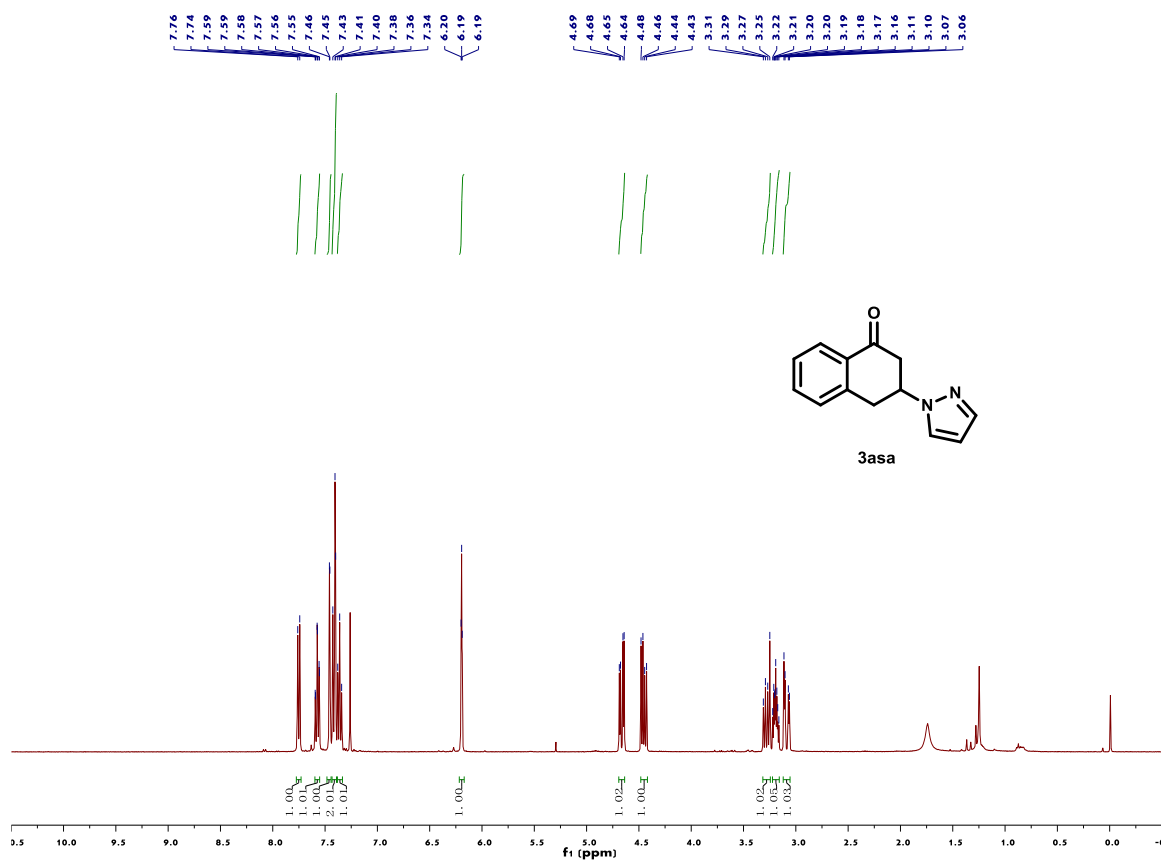

Supplementary Figure 198. <sup>1</sup>H NMR (400 MHz, CDCl<sub>3</sub>) spectrum for 3asa

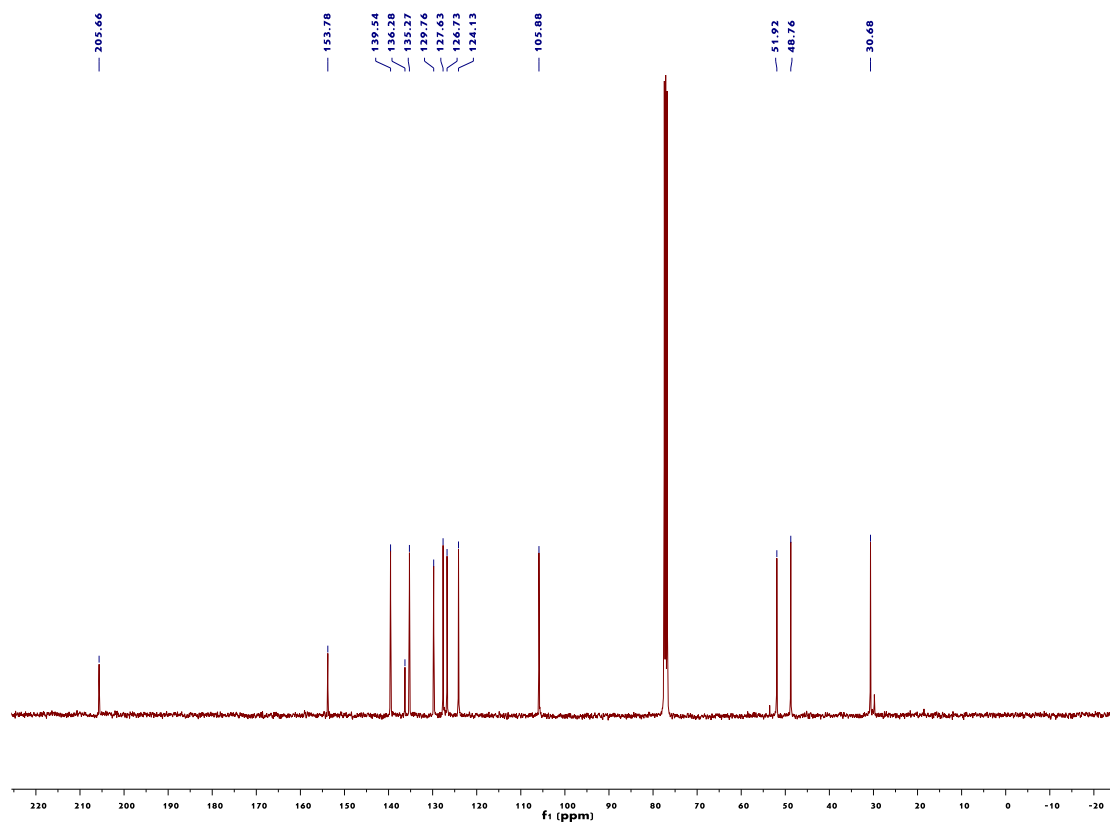

Supplementary Figure 199. <sup>13</sup>C NMR (100 MHz, CDCl<sub>3</sub>) spectrum for 3asa

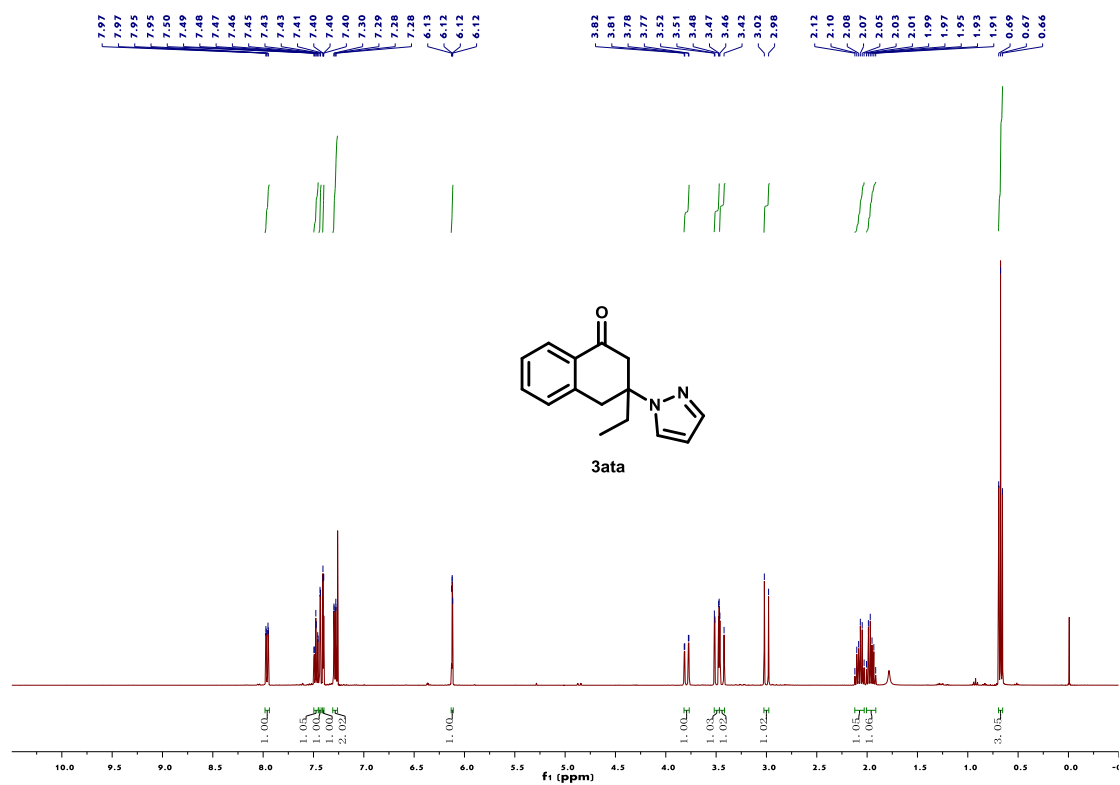

Supplementary Figure 200. <sup>1</sup>H NMR (400 MHz, CDCl<sub>3</sub>) spectrum for 3ata

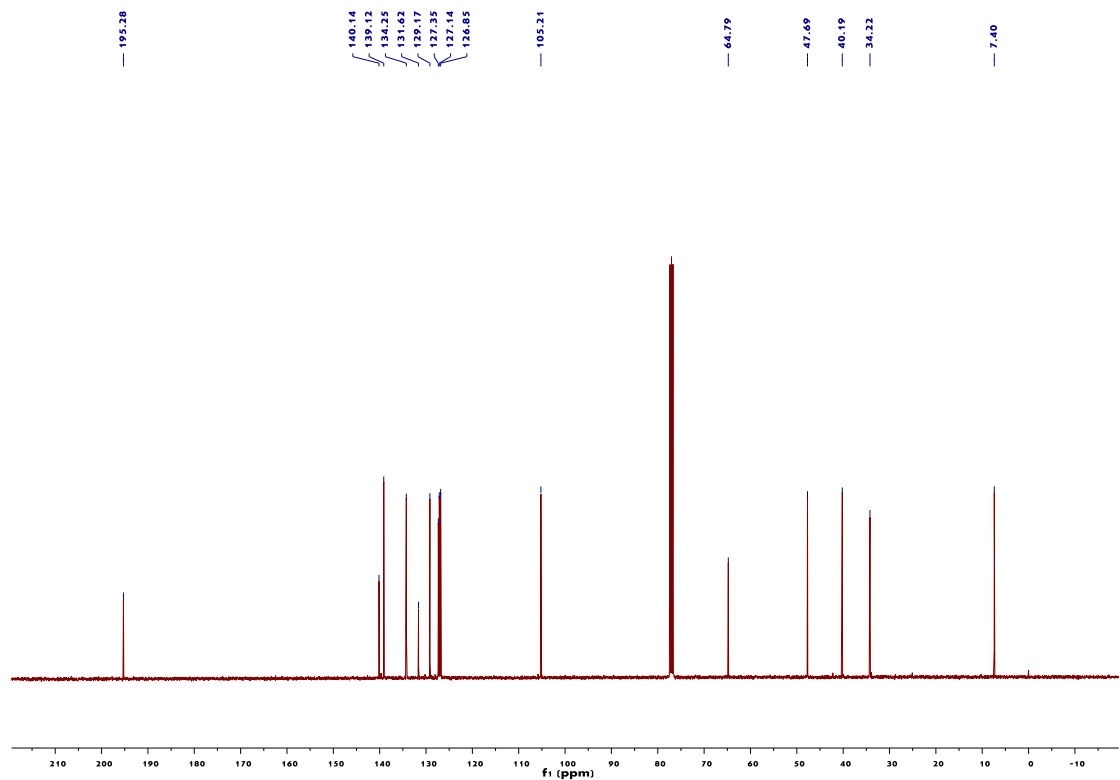

Supplementary Figure 201. <sup>13</sup>C NMR (100 MHz, CDCl<sub>3</sub>) spectrum for 3ata



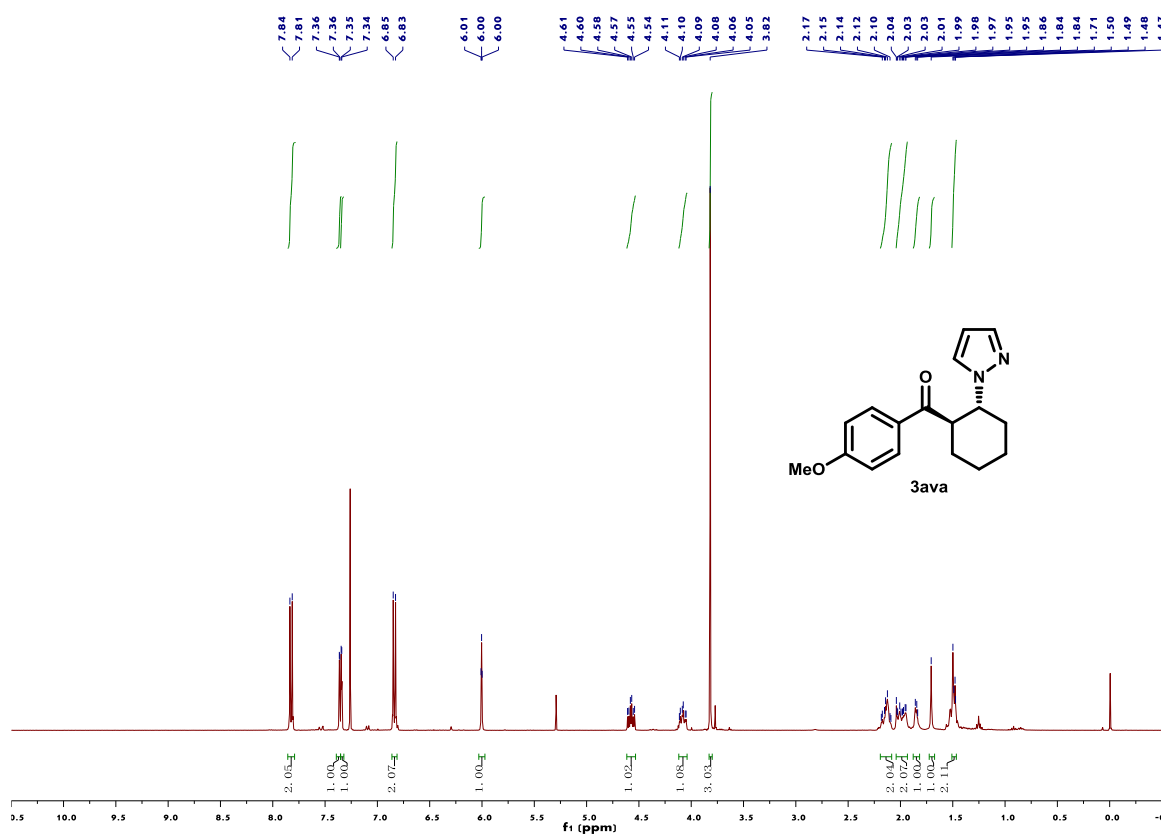

Supplementary Figure 204.  $^1\text{H}$  NMR (400 MHz,  $\text{CDCl}_3$ ) spectrum for 3ava

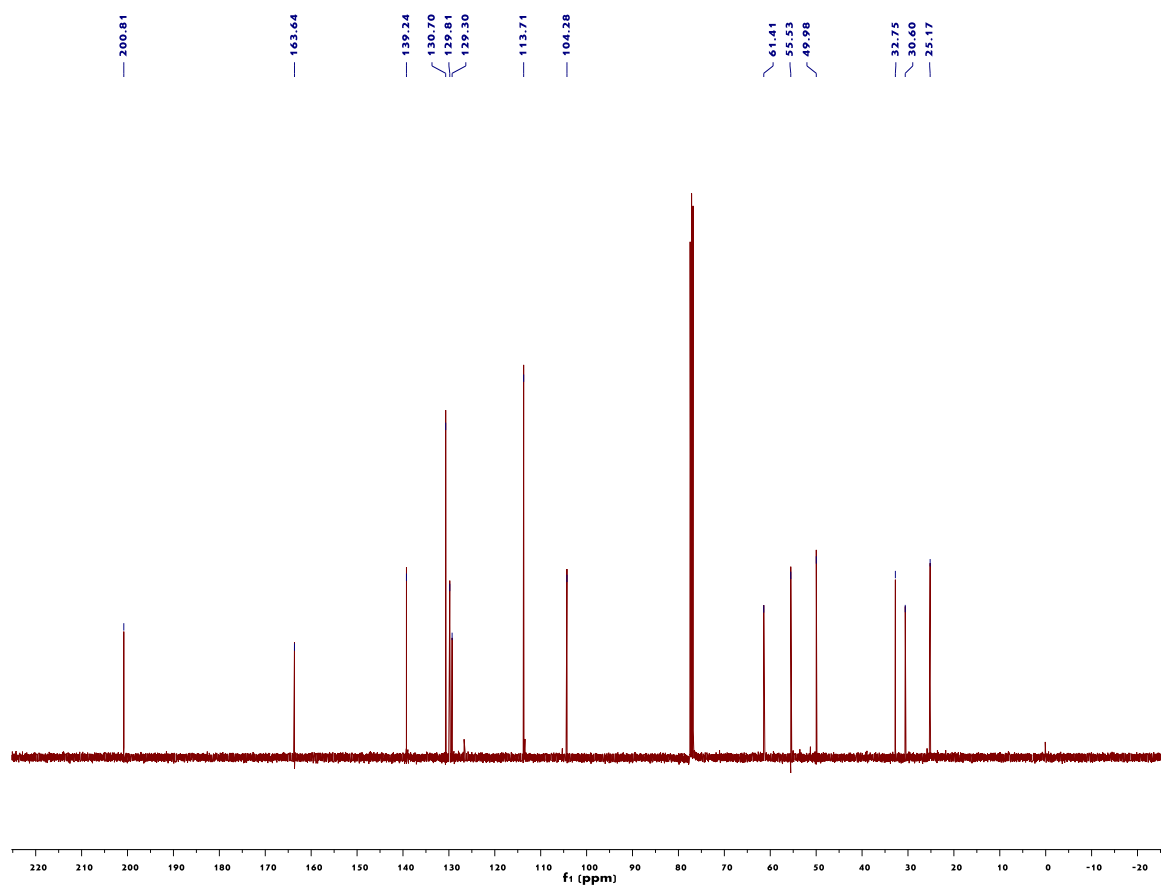

Supplementary Figure 205.  $^{13}\text{C}$  NMR (100 MHz,  $\text{CDCl}_3$ ) spectrum for 3ava



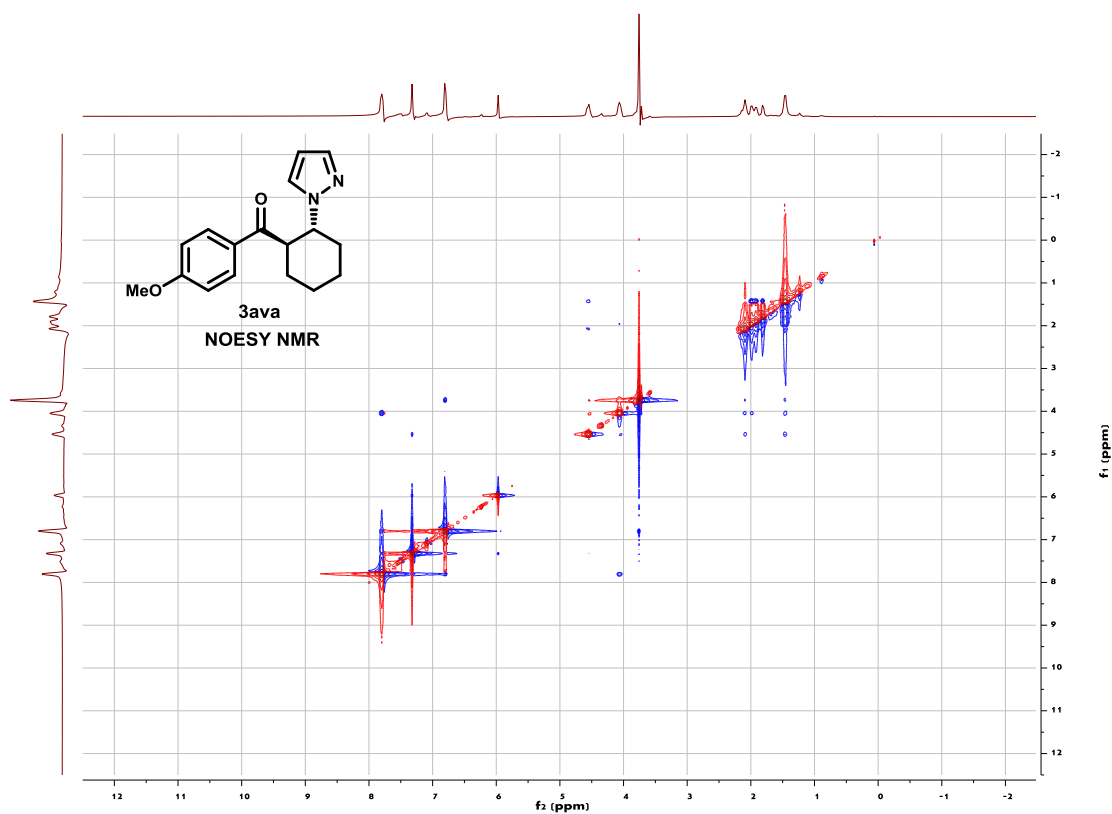

Supplementary Figure 206. NOESY NMR spectrum for 3ava

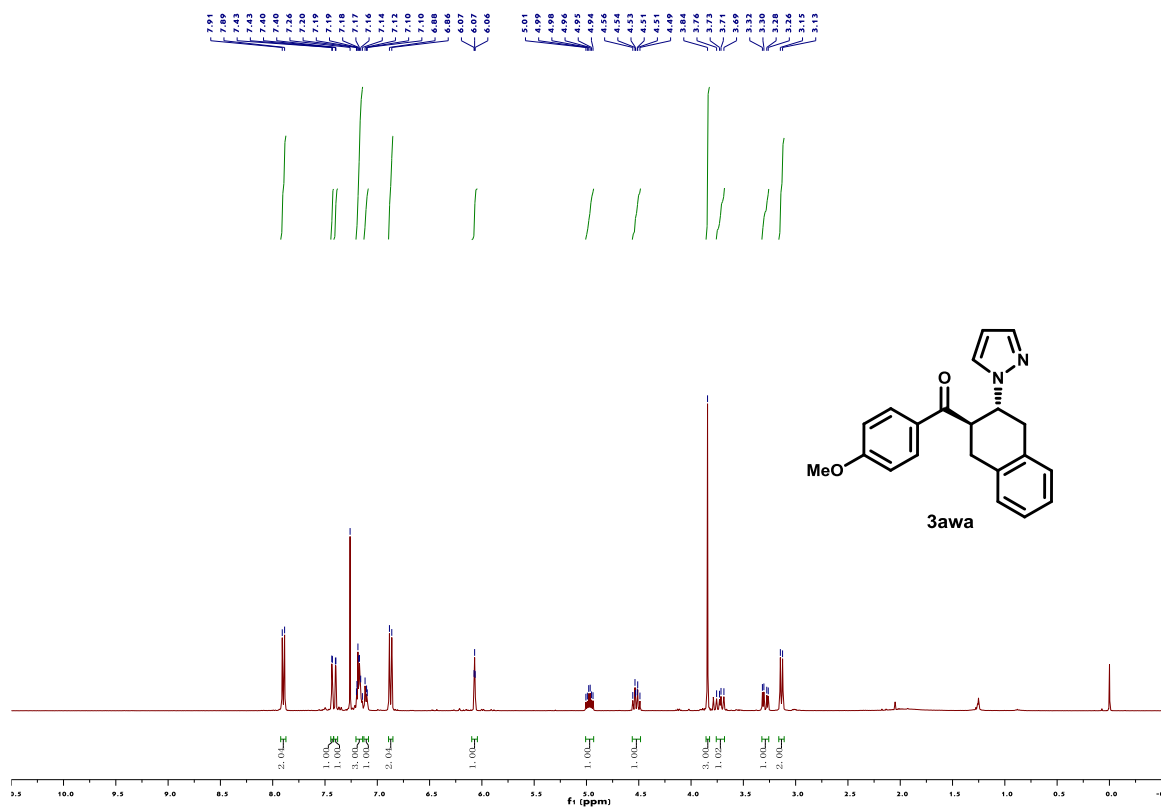

Supplementary Figure 207. <sup>1</sup>H NMR (400 MHz, CDCl<sub>3</sub>) spectrum for 3awa

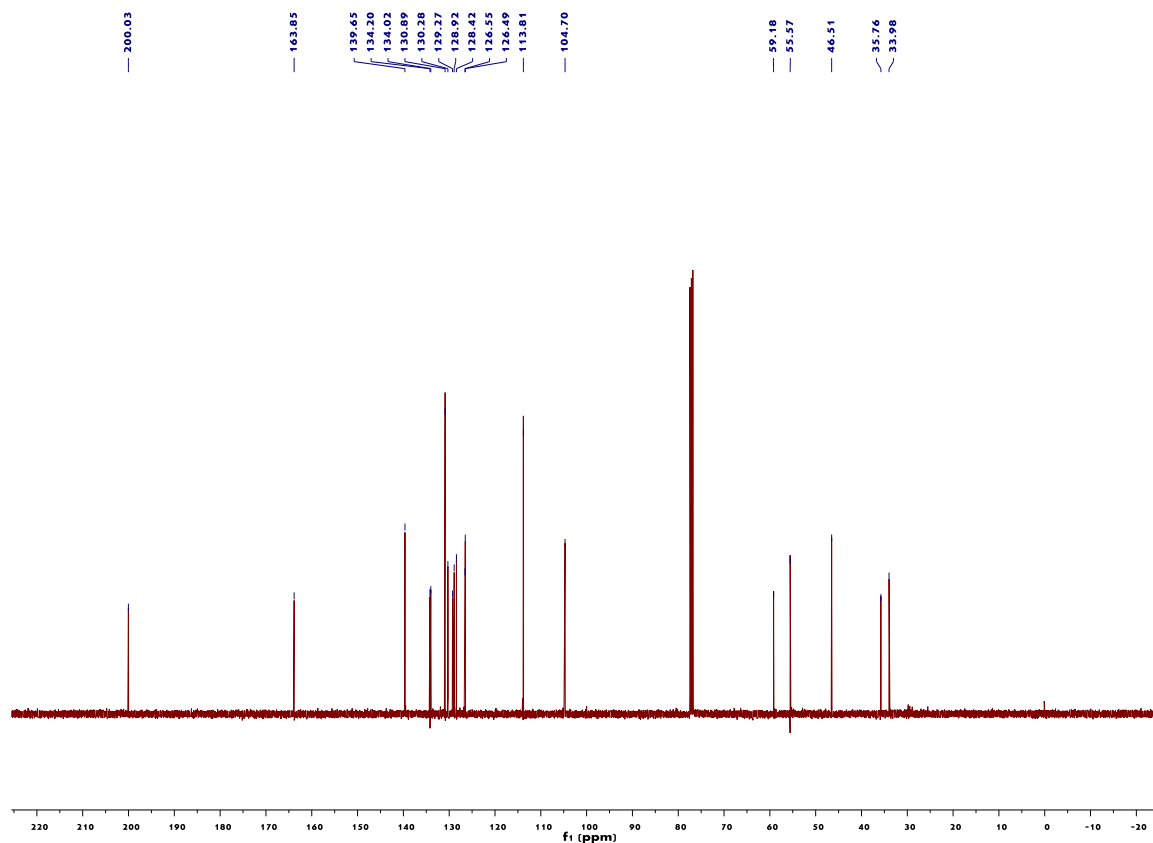

Supplementary Figure 208.  $^{13}\text{C}$  NMR (100 MHz,  $\text{CDCl}_3$ ) spectrum for 3awa

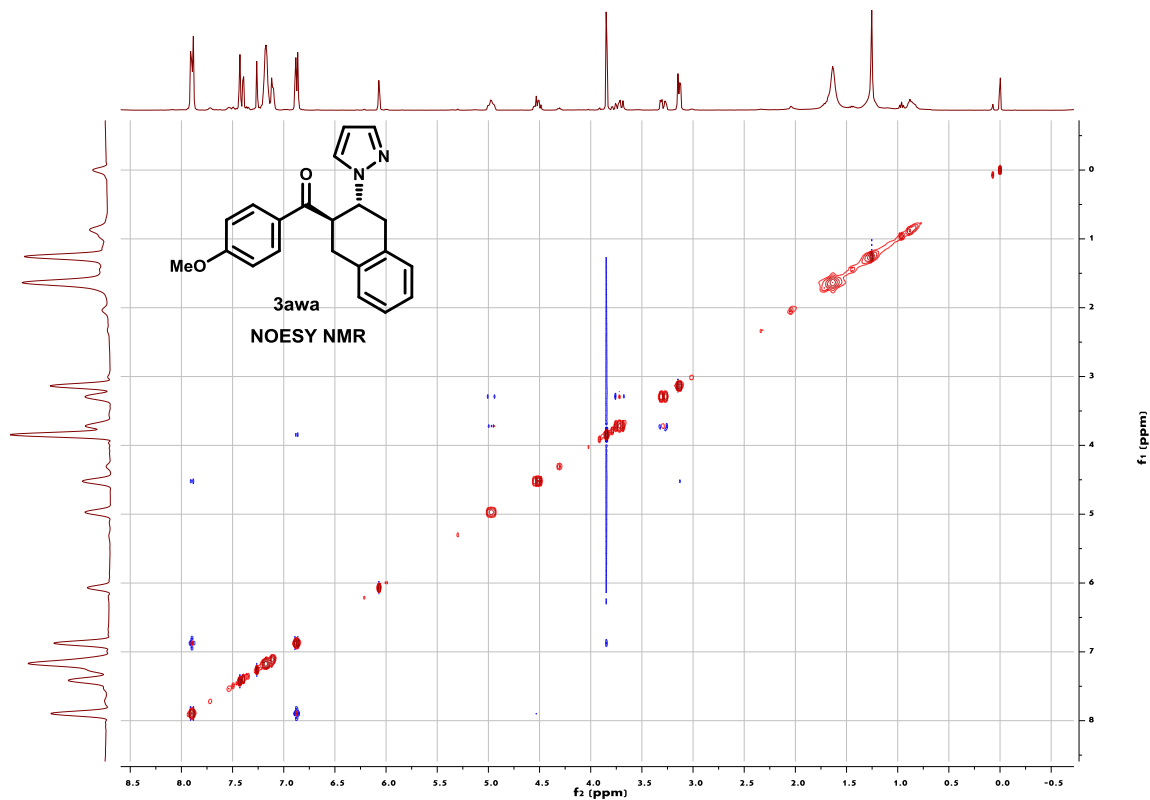

Supplementary Figure 209. NOESY NMR spectrum for 3awa

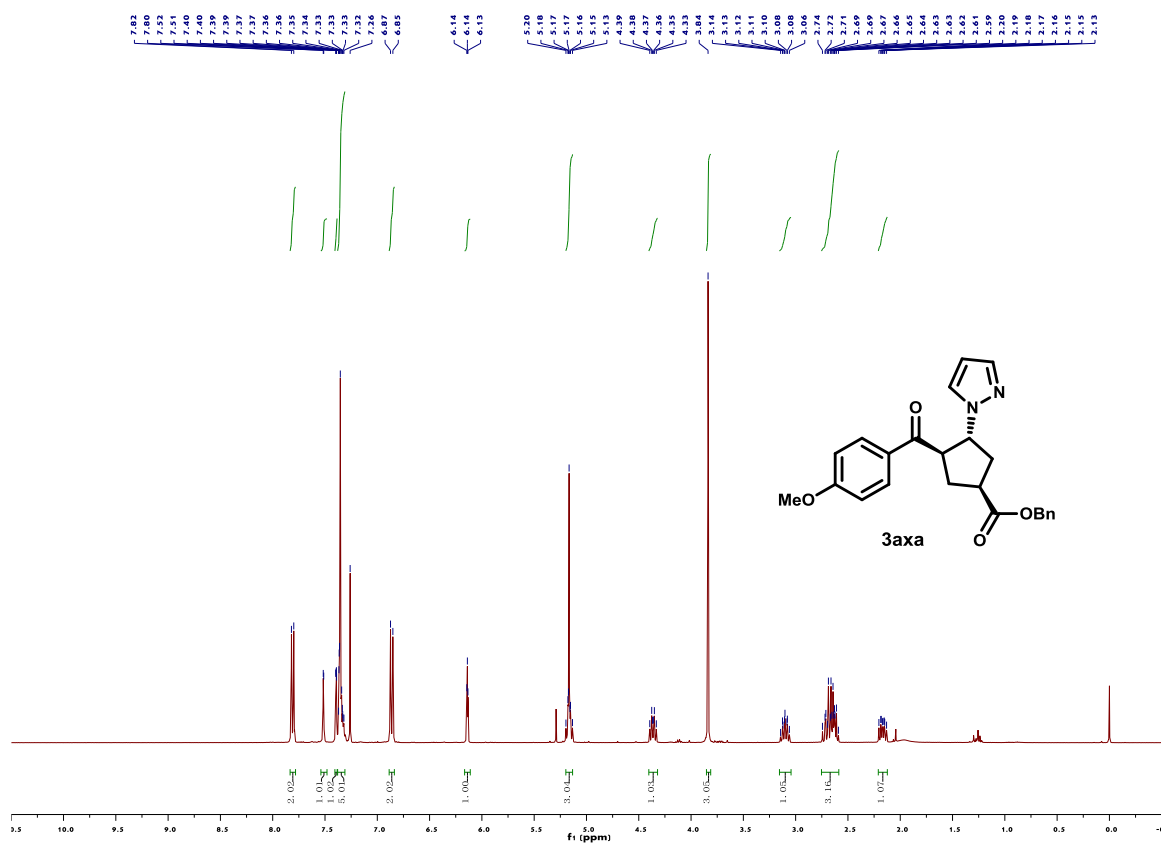

Supplementary Figure 210. <sup>1</sup>H NMR (400 MHz, CDCl<sub>3</sub>) spectrum for 3axa

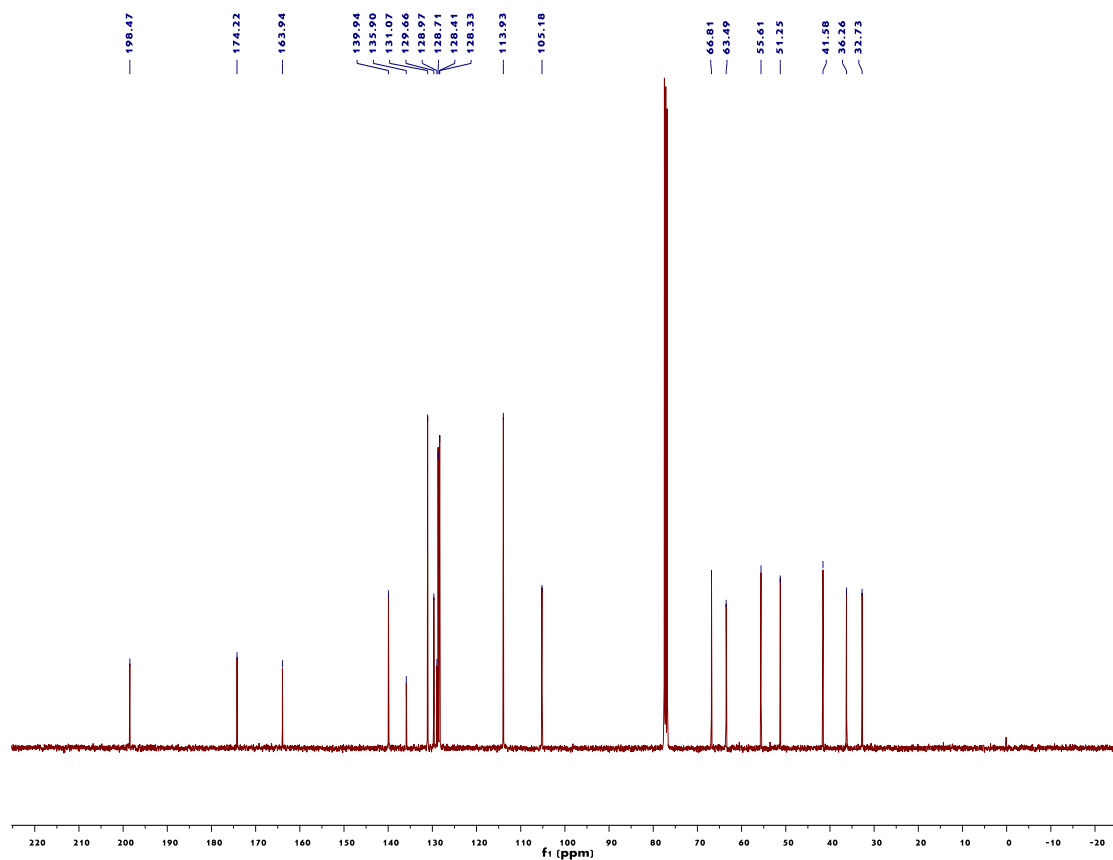

Supplementary Figure 211. <sup>13</sup>C NMR (100 MHz, CDCl<sub>3</sub>) spectrum for 3axa

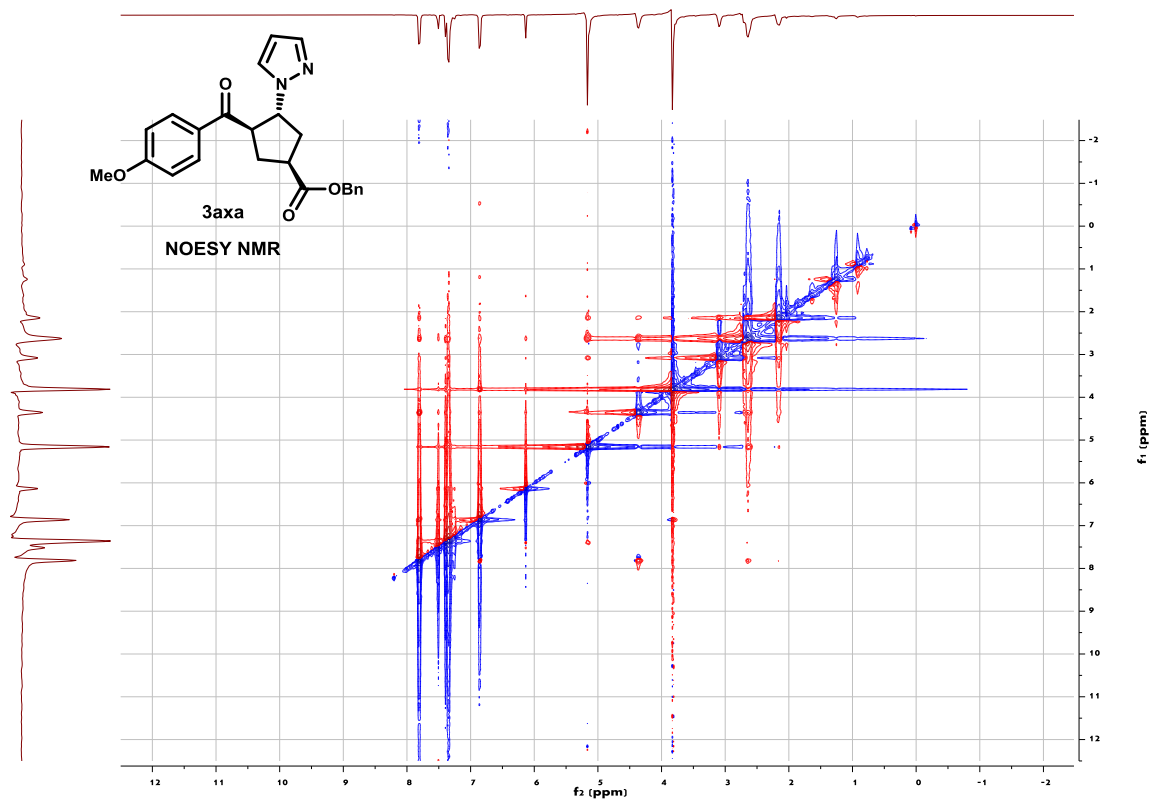

Supplementary Figure 212. NOESY NMR spectrum for 3axa

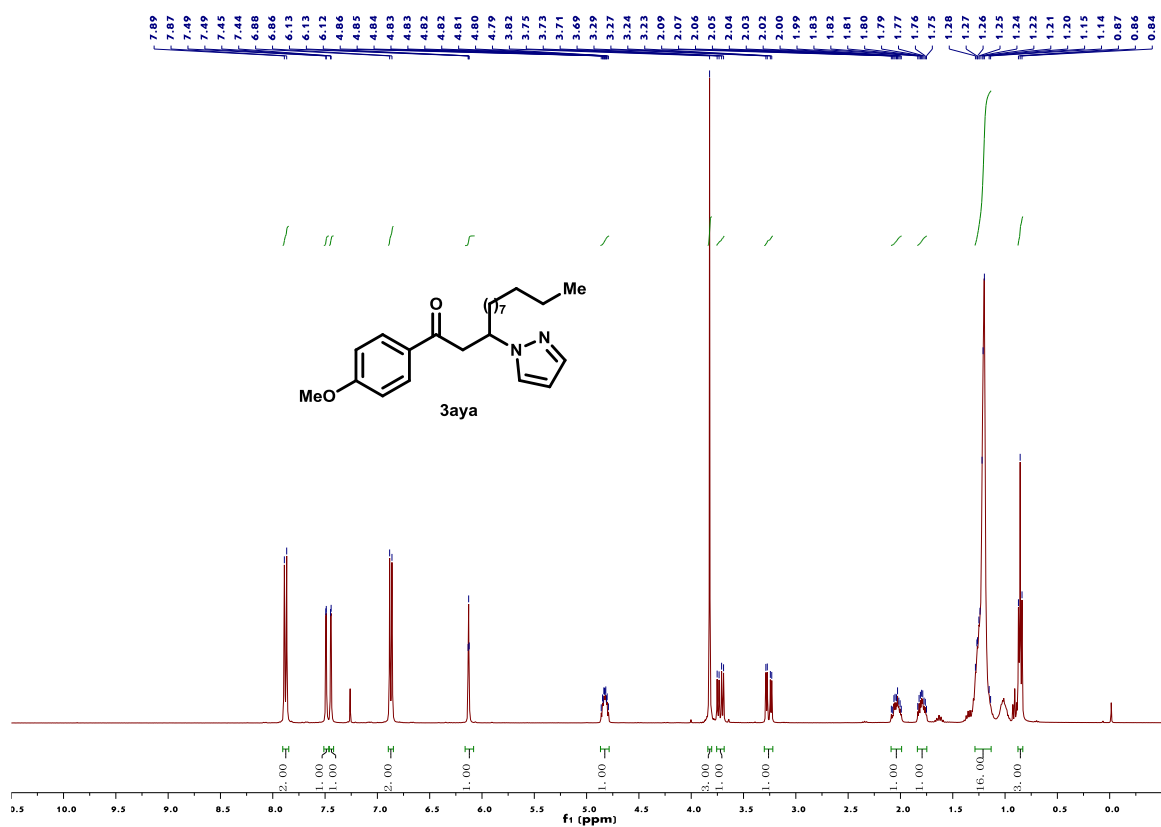

Supplementary Figure 213.  $^1\text{H}$  NMR (400 MHz,  $\text{CDCl}_3$ ) spectrum for 3aya

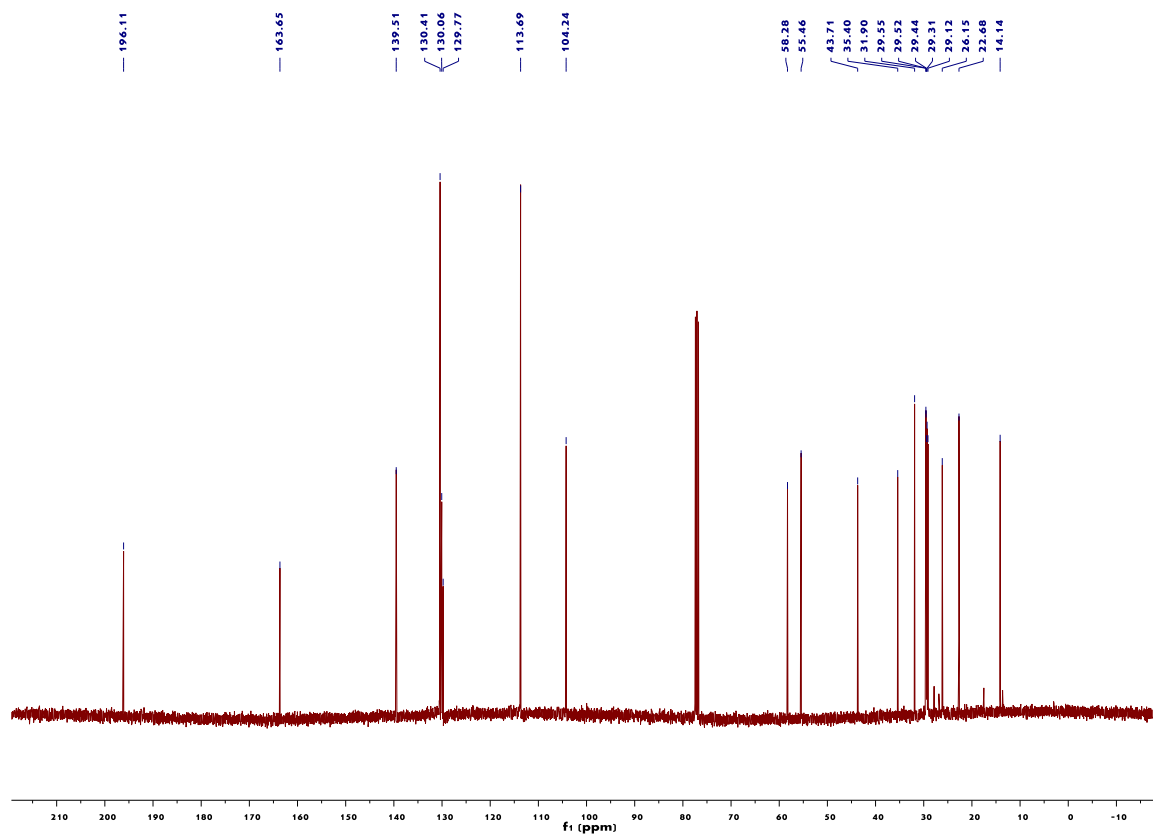

Supplementary Figure 214.  $^{13}\text{C}$  NMR (100 MHz,  $\text{CDCl}_3$ ) spectrum for 3aya

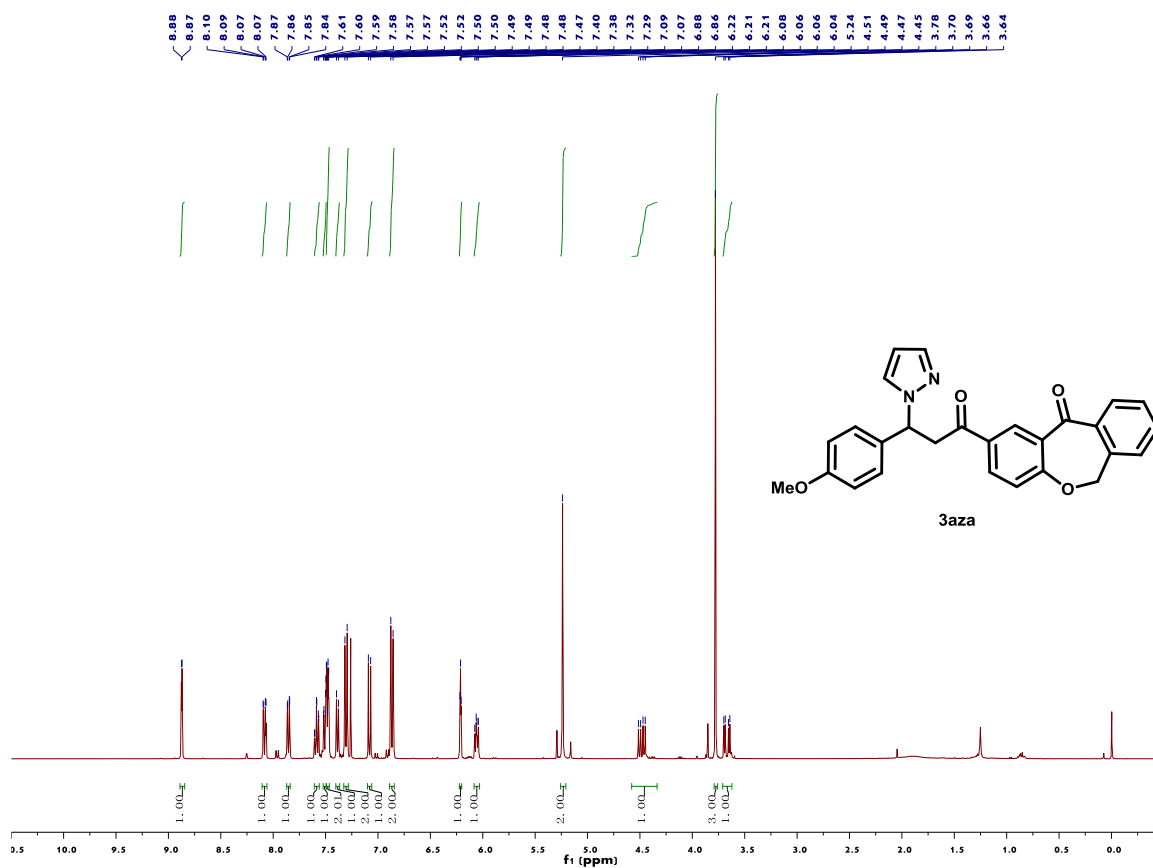

Supplementary Figure 215.  $^1\text{H}$  NMR (400 MHz,  $\text{CDCl}_3$ ) spectrum for 3aza

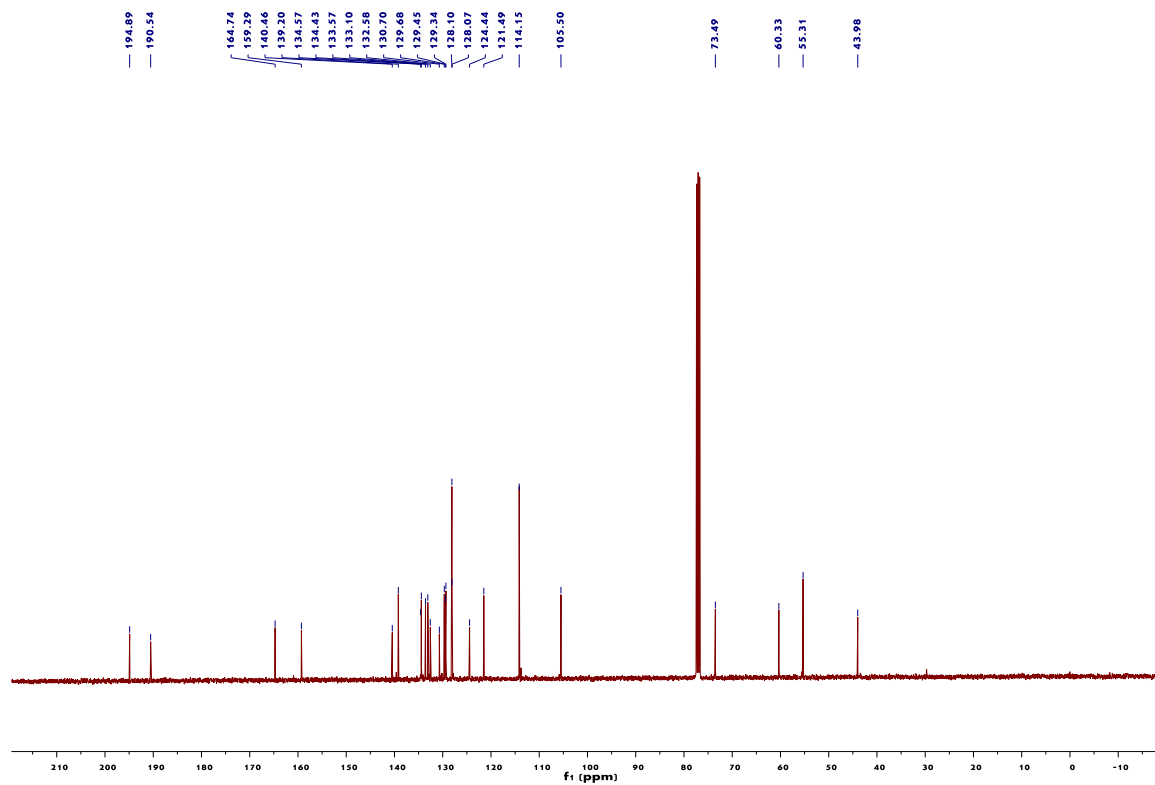

Supplementary Figure 216.  $^{13}\text{C}$  NMR (100 MHz,  $\text{CDCl}_3$ ) spectrum for 3aza

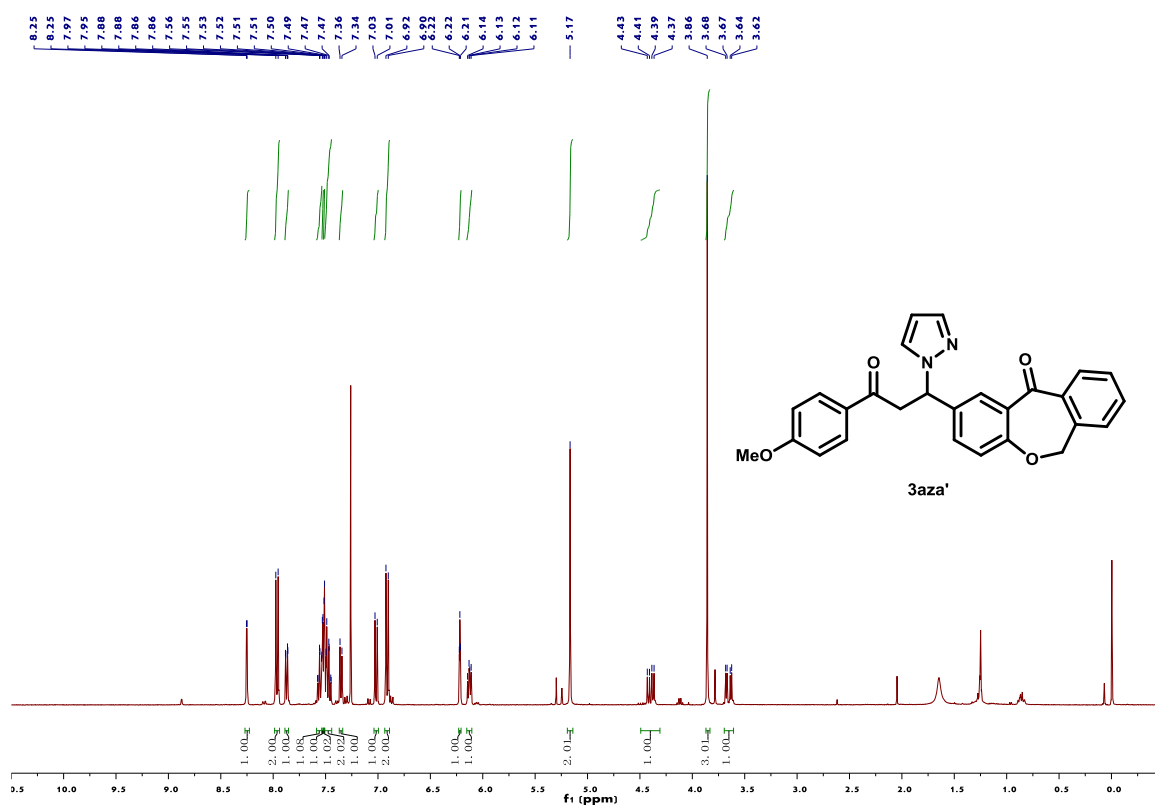

Supplementary Figure 217.  $^1\text{H}$  NMR (400 MHz,  $\text{CDCl}_3$ ) spectrum for 3aza'

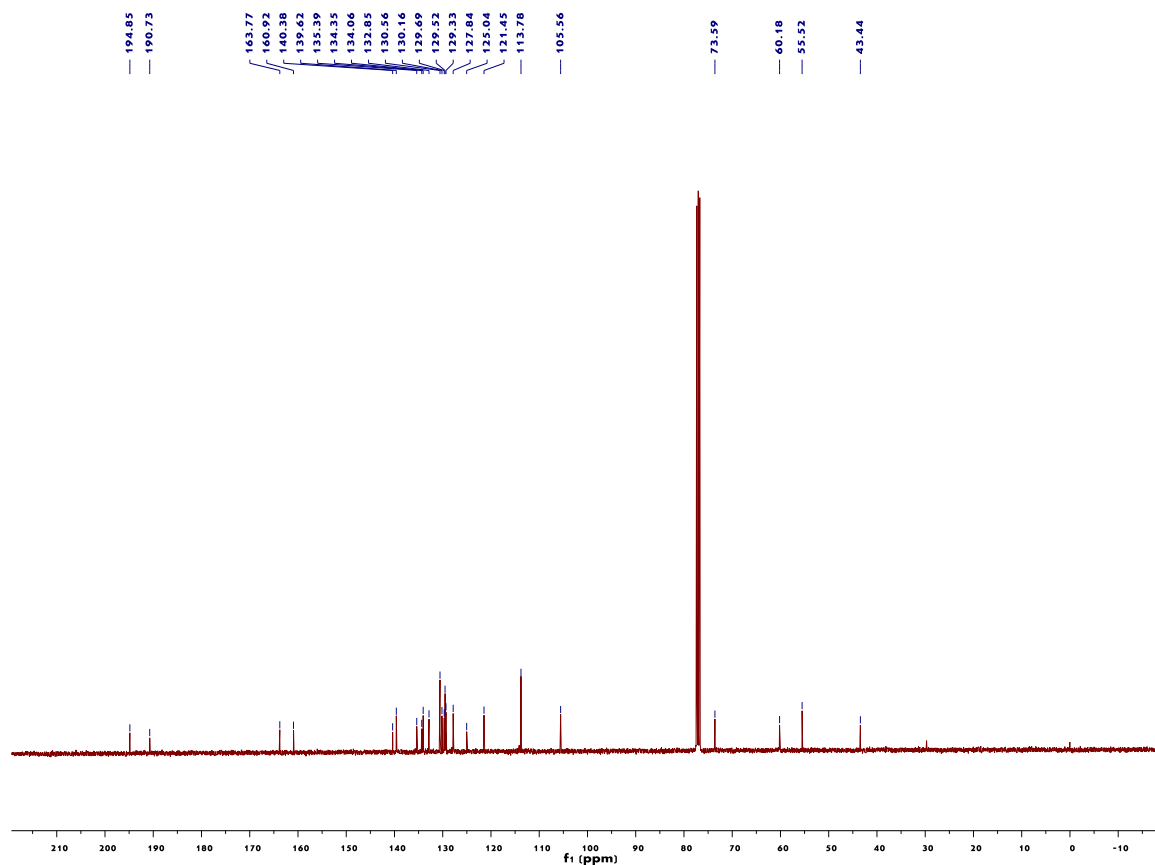

Supplementary Figure 218. <sup>13</sup>C NMR (100 MHz, CDCl<sub>3</sub>) spectrum for 3aza'

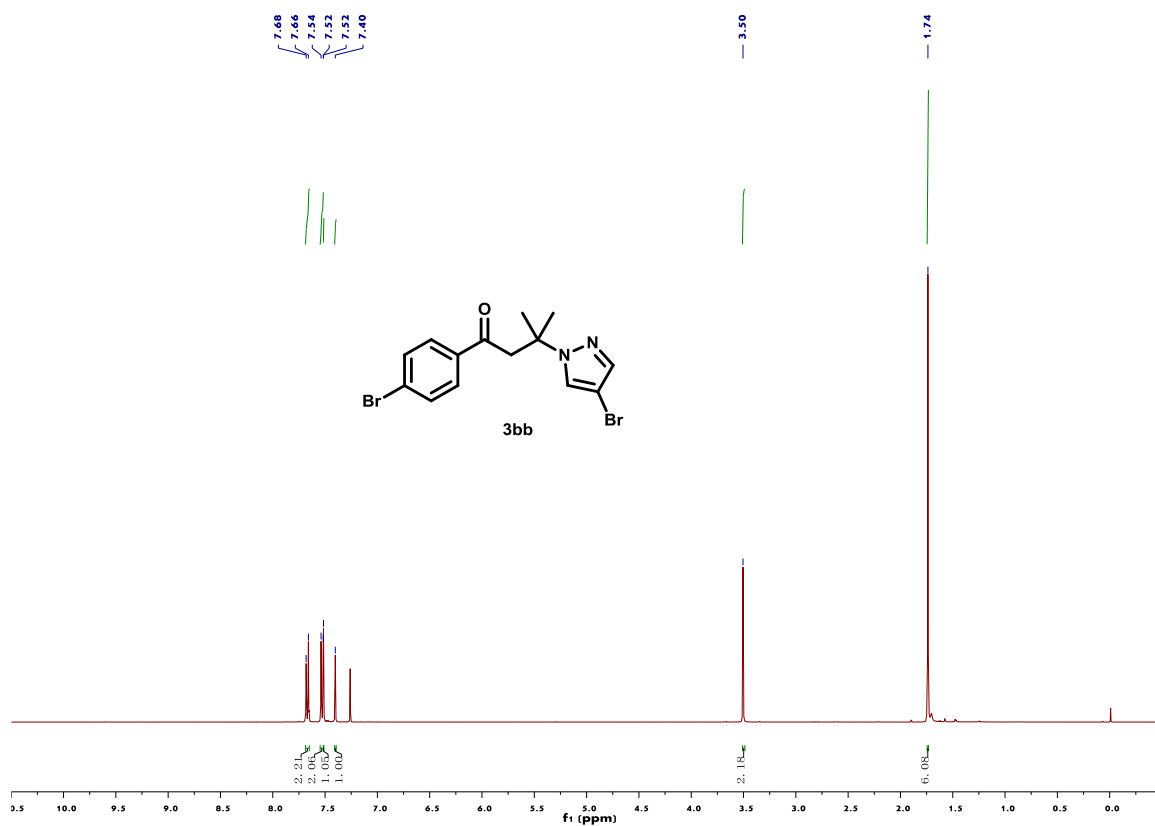

Supplementary Figure 219. <sup>1</sup>H NMR (400 MHz, CDCl<sub>3</sub>) spectrum for 3bb

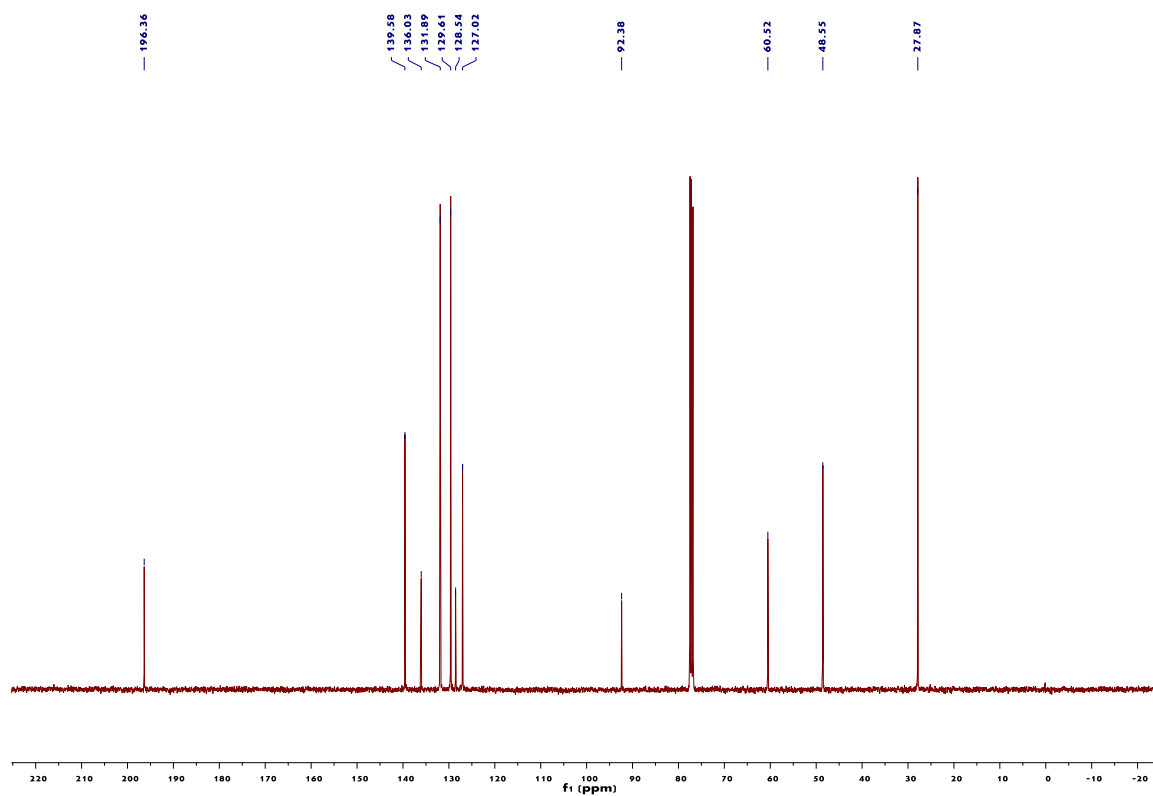

Supplementary Figure 220.  $^{13}\text{C}$  NMR (100 MHz,  $\text{CDCl}_3$ ) spectrum for 3bb

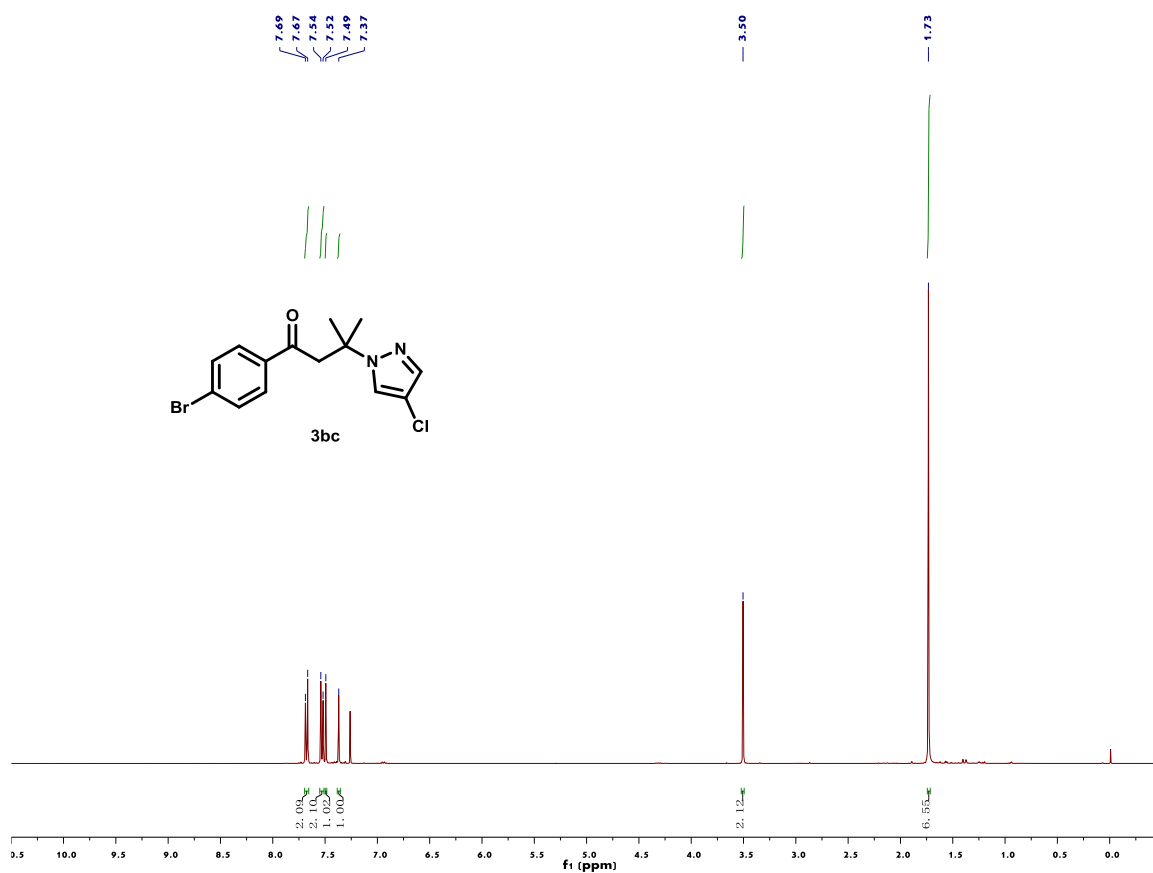

Supplementary Figure 221.  $^1\text{H}$  NMR (400 MHz,  $\text{CDCl}_3$ ) spectrum for 3bc



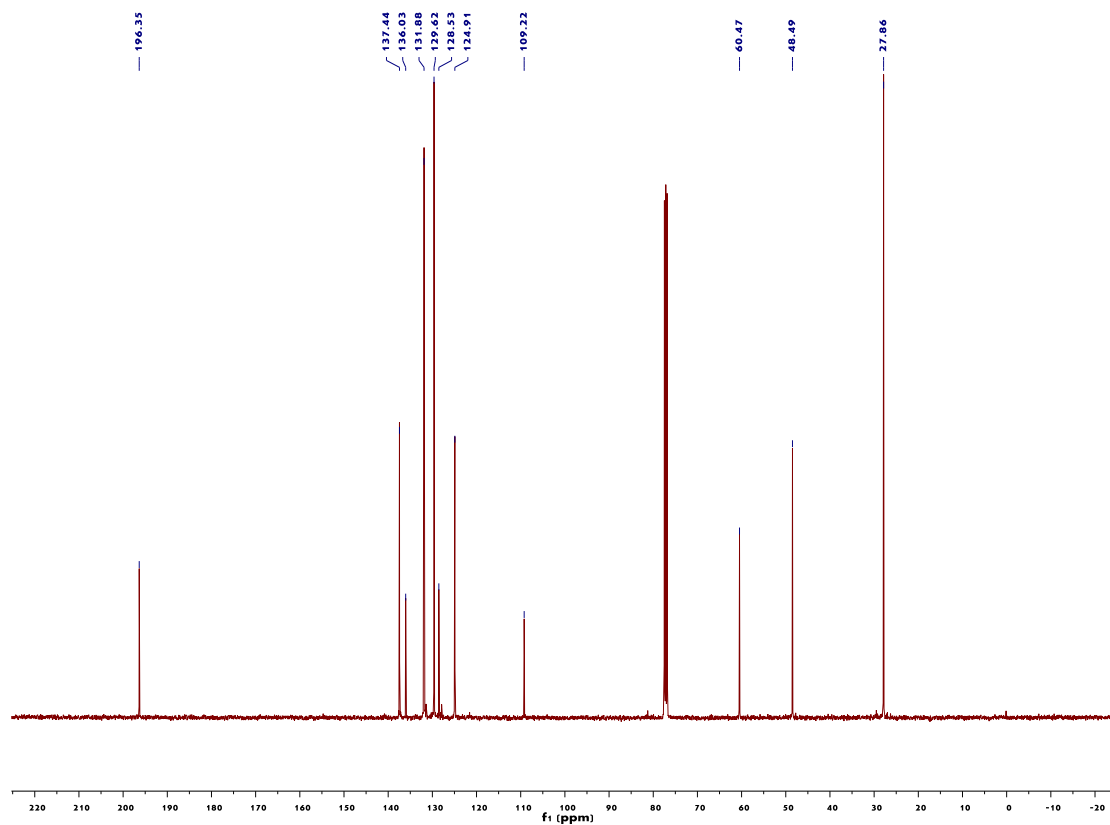

Supplementary Figure 222. <sup>13</sup>C NMR (100 MHz, CDCl<sub>3</sub>) spectrum for 3bc

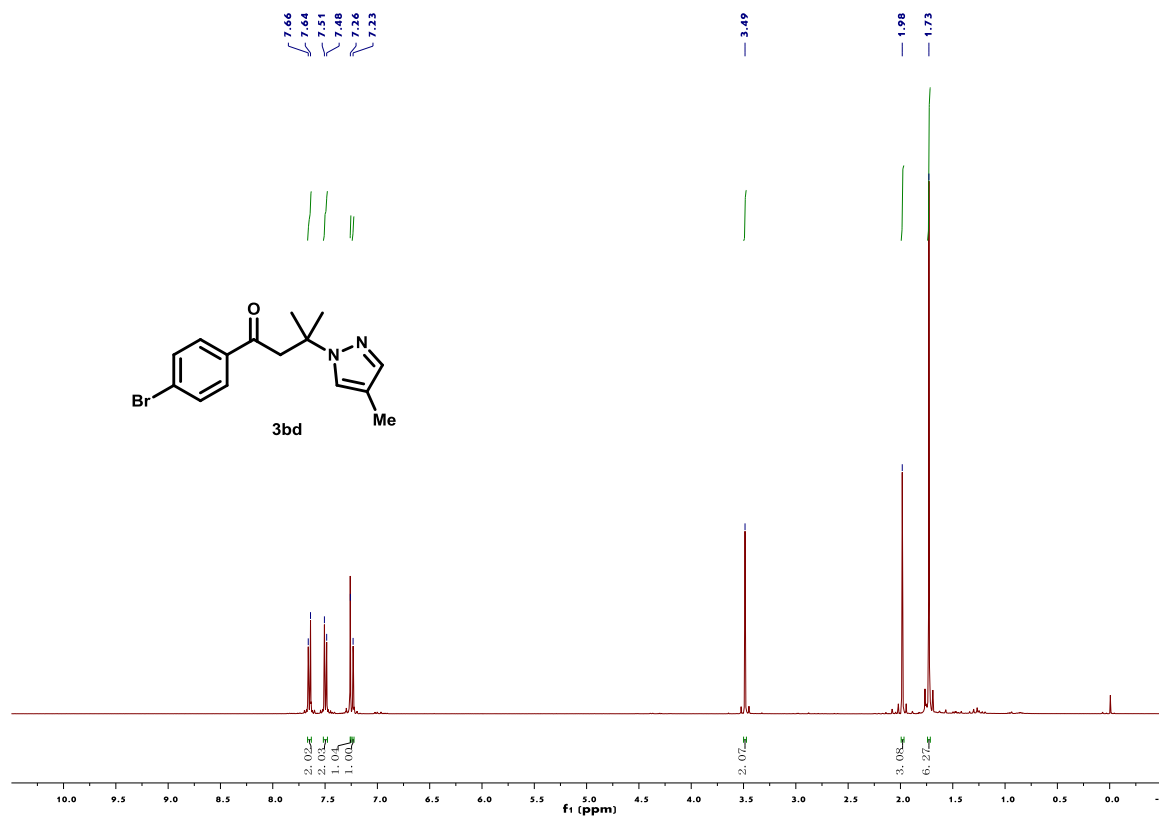

Supplementary Figure 223. <sup>1</sup>H NMR (400 MHz, CDCl<sub>3</sub>) spectrum for 3bd

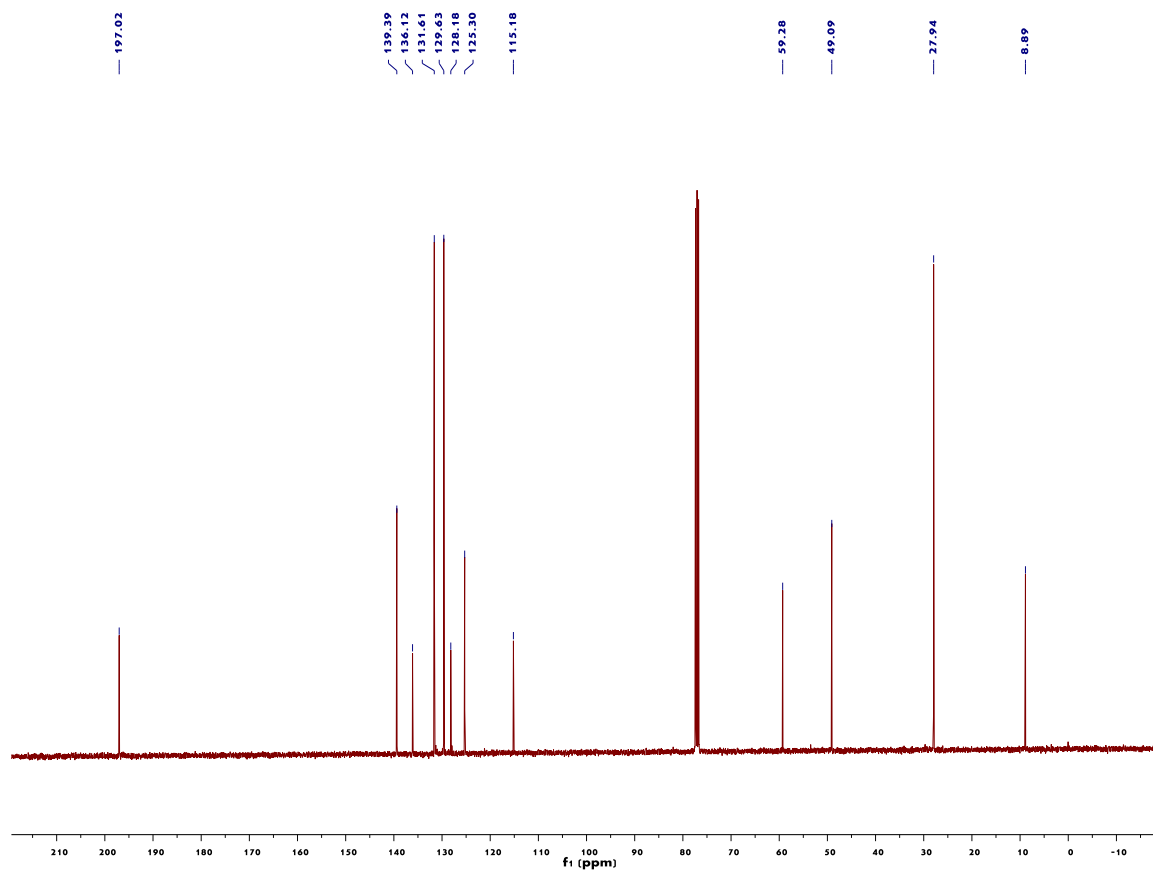

Supplementary Figure 224.  $^{13}\text{C}$  NMR (100 MHz,  $\text{CDCl}_3$ ) spectrum for 3bd

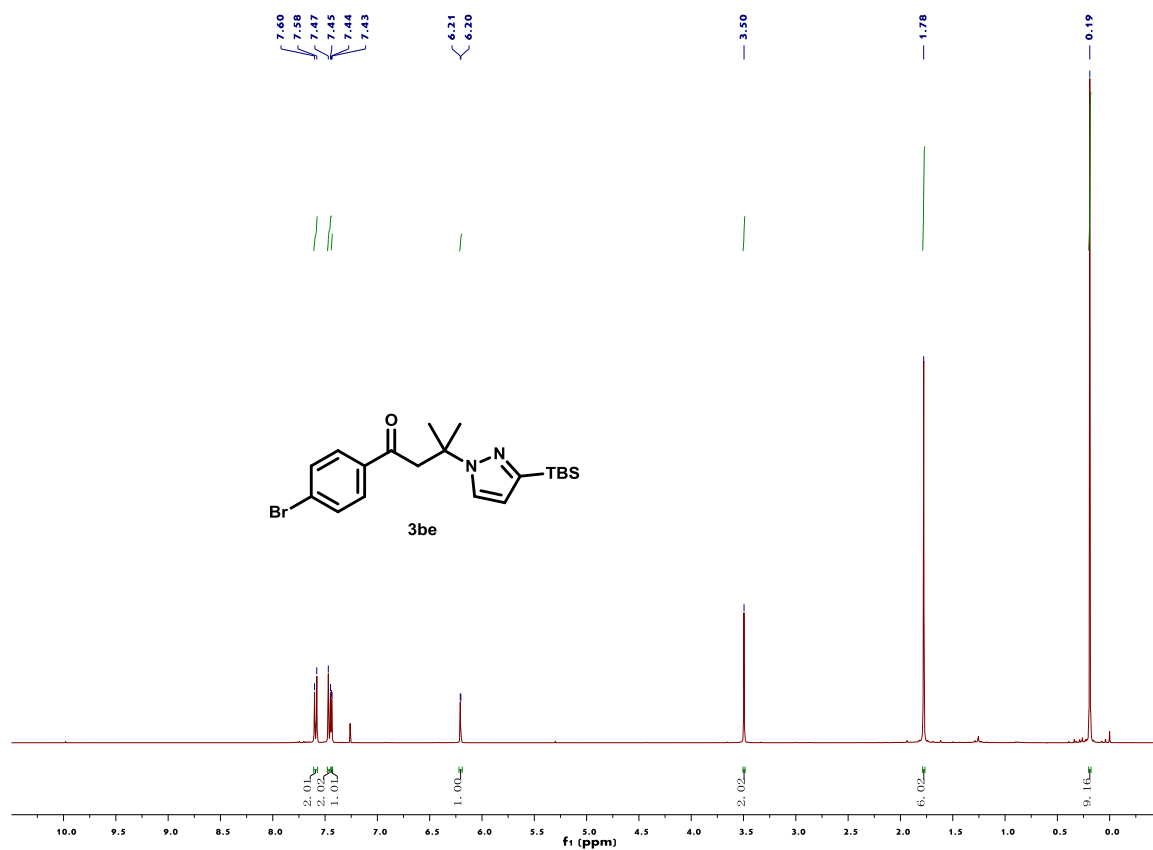

Supplementary Figure 225.  $^1\text{H}$  NMR (400 MHz,  $\text{CDCl}_3$ ) spectrum for 3be

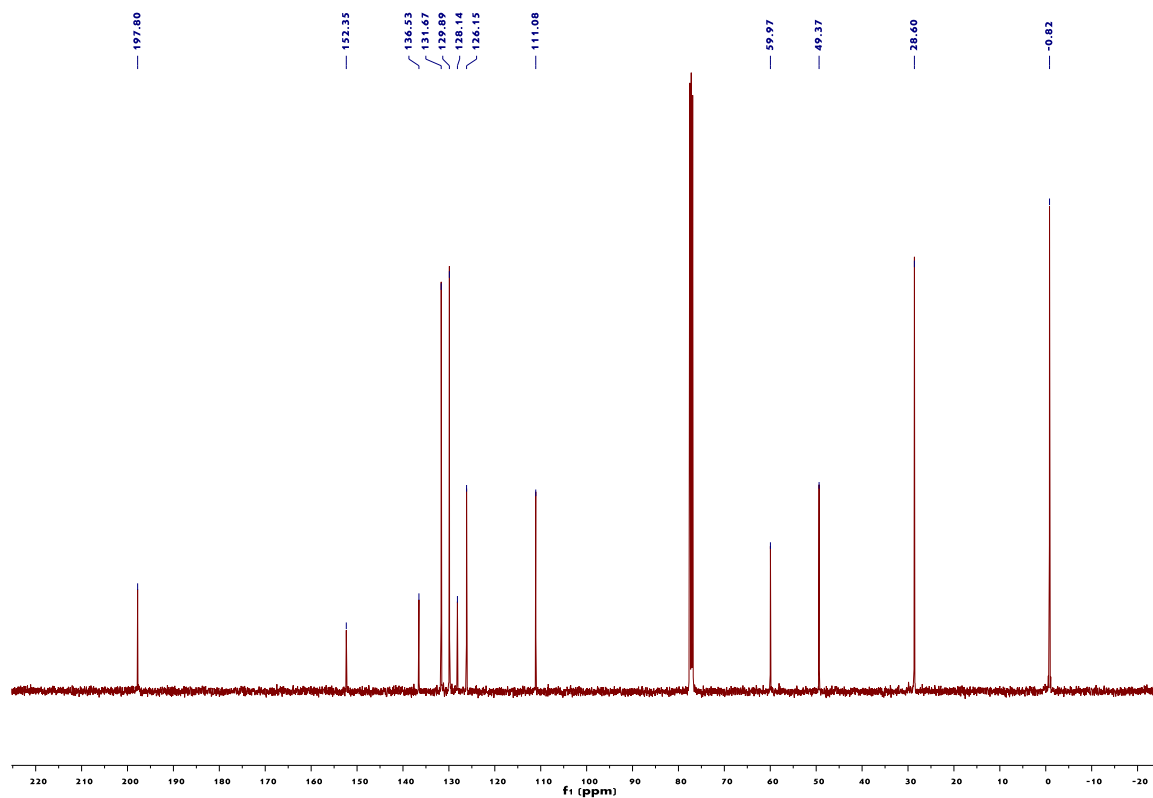

Supplementary Figure 226. <sup>13</sup>C NMR (100 MHz, CDCl<sub>3</sub>) spectrum for 3be

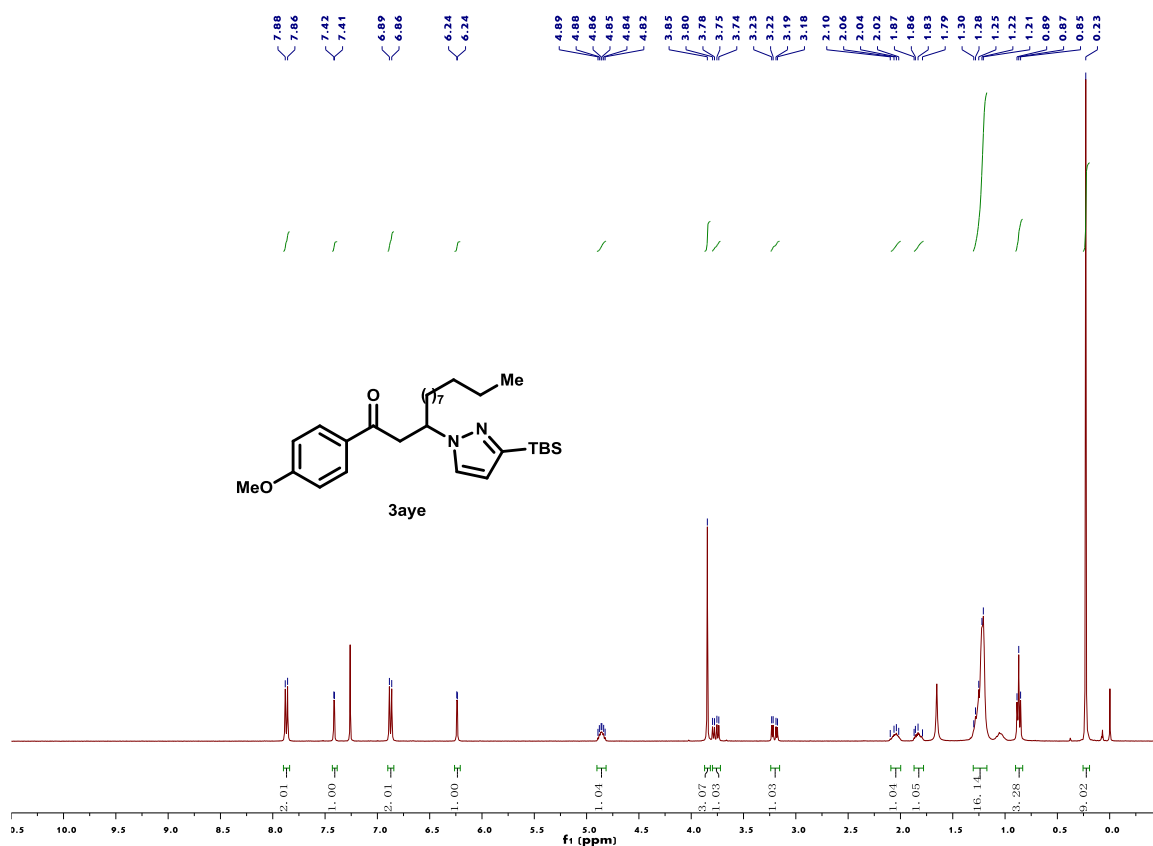

Supplementary Figure 227. <sup>1</sup>H NMR (400 MHz, CDCl<sub>3</sub>) spectrum for 3aye

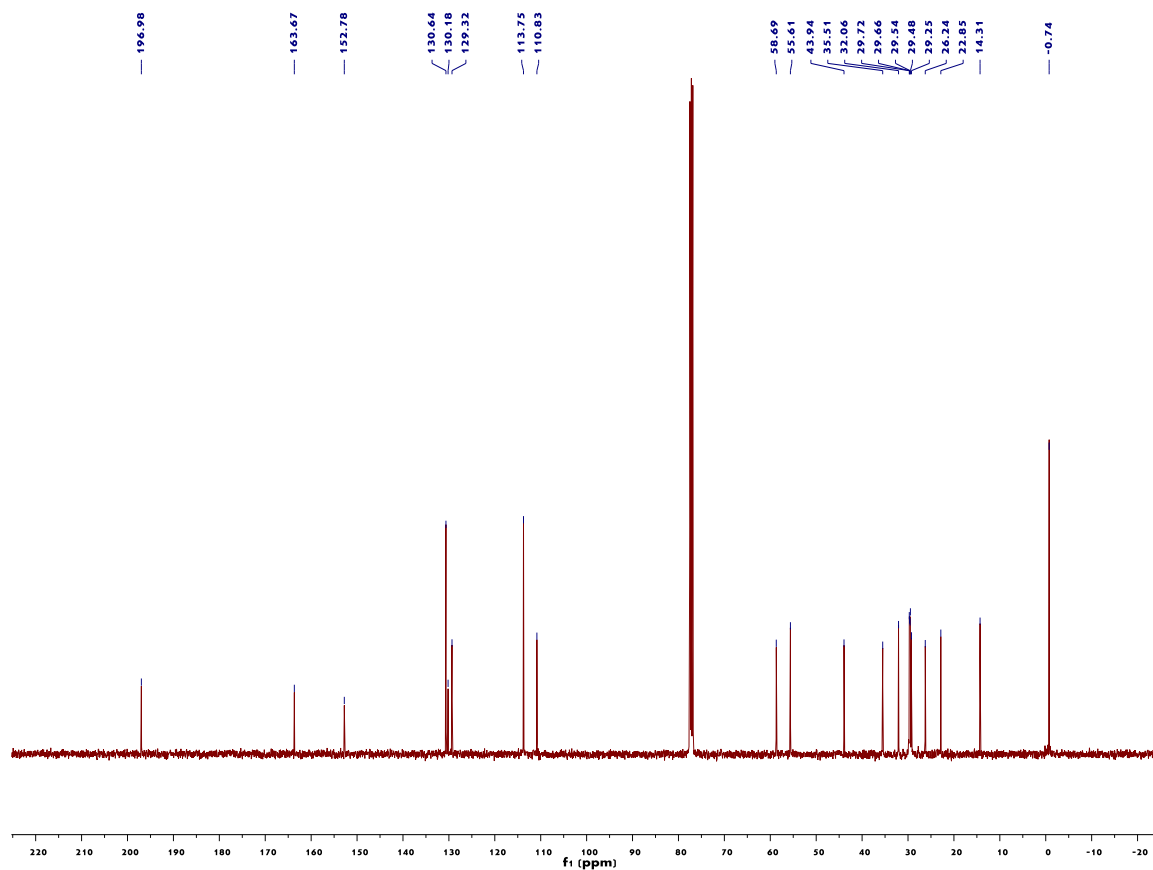

Supplementary Figure 228. <sup>13</sup>C NMR (100 MHz, CDCl<sub>3</sub>) spectrum for 3aye

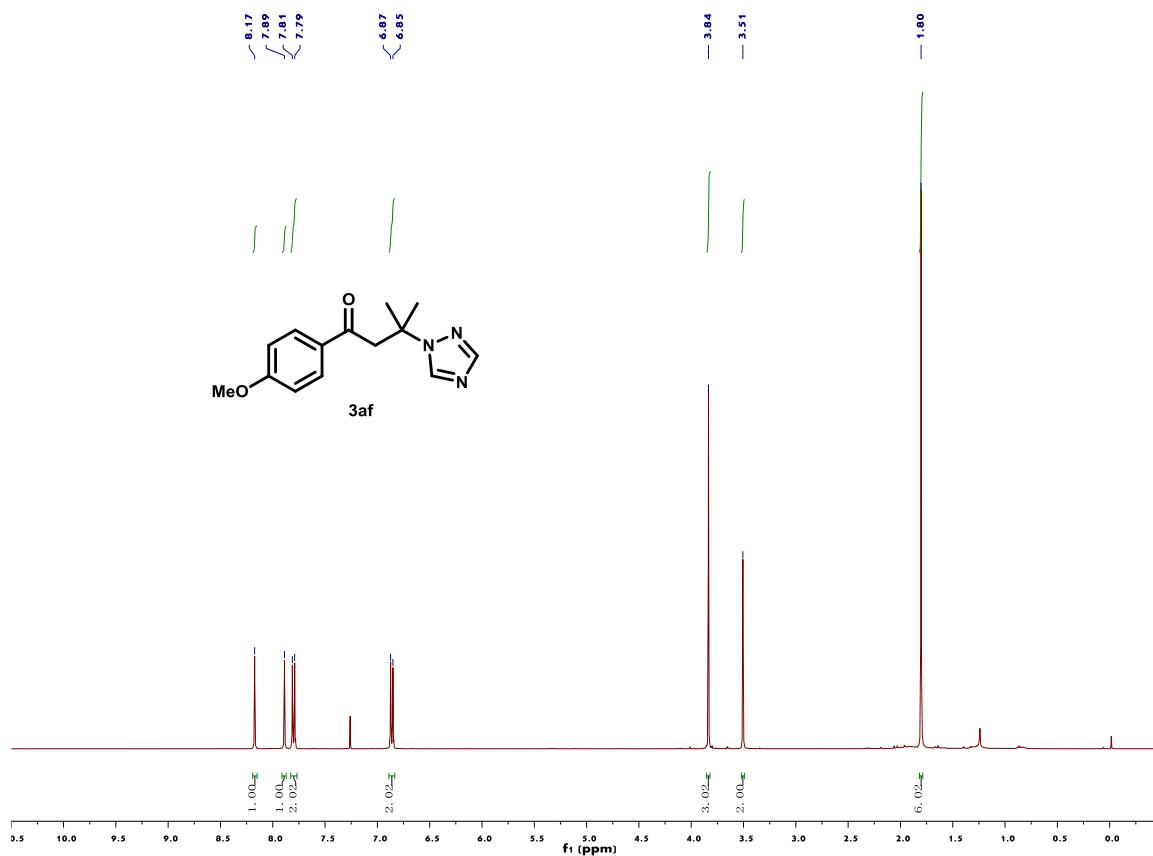

Supplementary Figure 229. <sup>1</sup>H NMR (400 MHz, CDCl<sub>3</sub>) spectrum for 3af

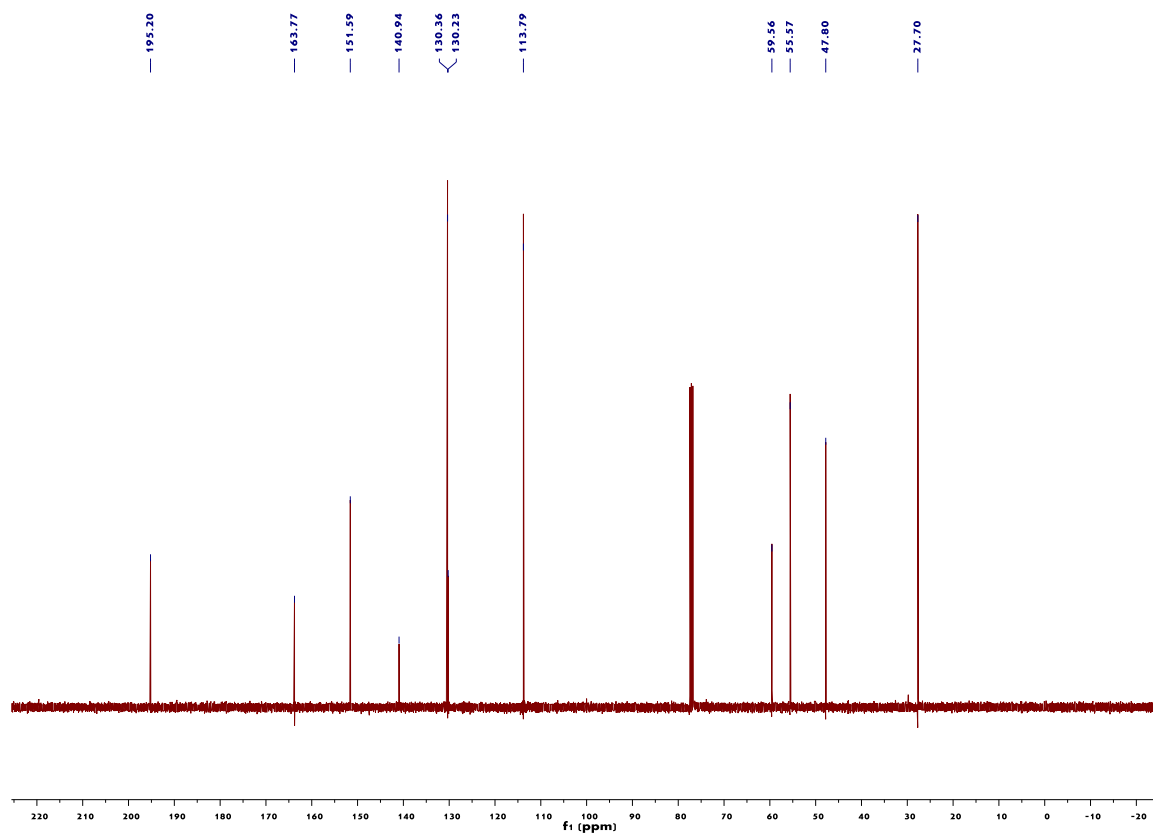

Supplementary Figure 230. <sup>13</sup>C NMR (100 MHz, CDCl<sub>3</sub>) spectrum for 3af

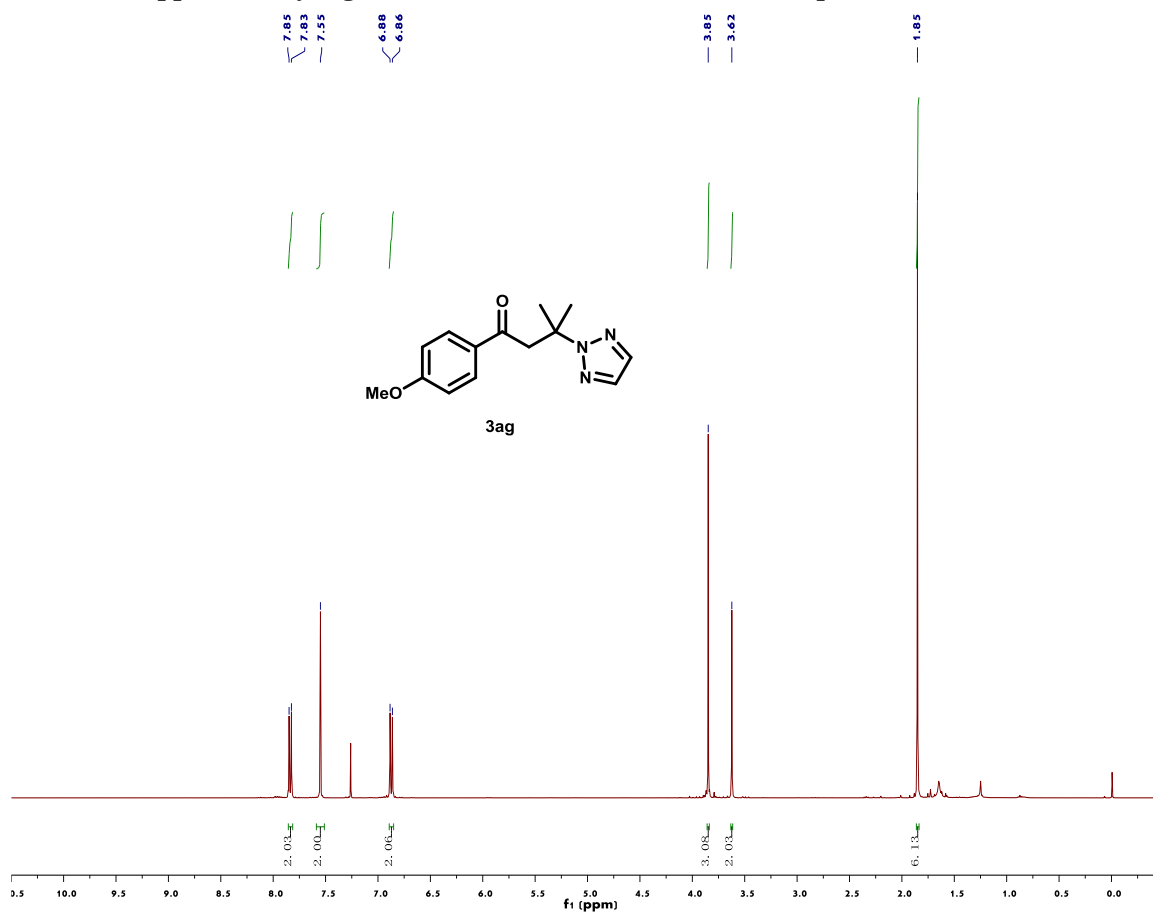

Supplementary Figure 231. <sup>1</sup>H NMR (400 MHz, CDCl<sub>3</sub>) spectrum for 3ag

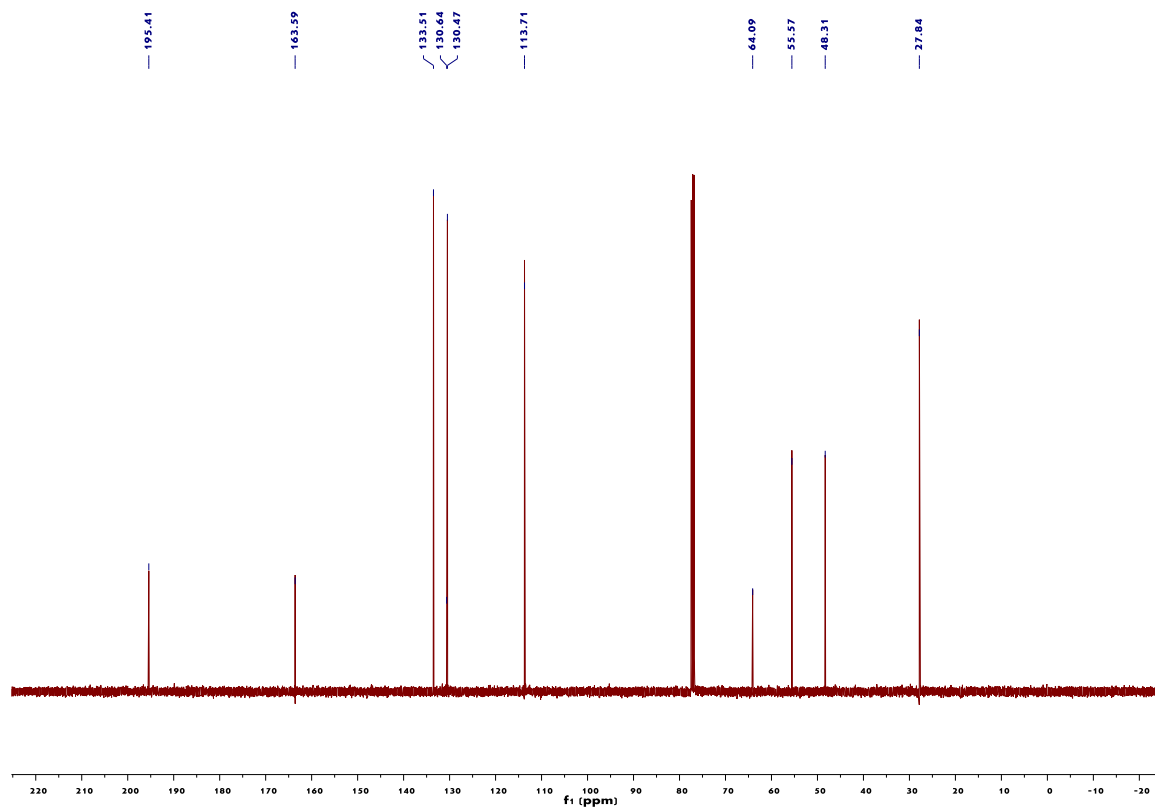

Supplementary Figure 232.  $^{13}\text{C}$  NMR (100 MHz,  $\text{CDCl}_3$ ) spectrum for 3ag

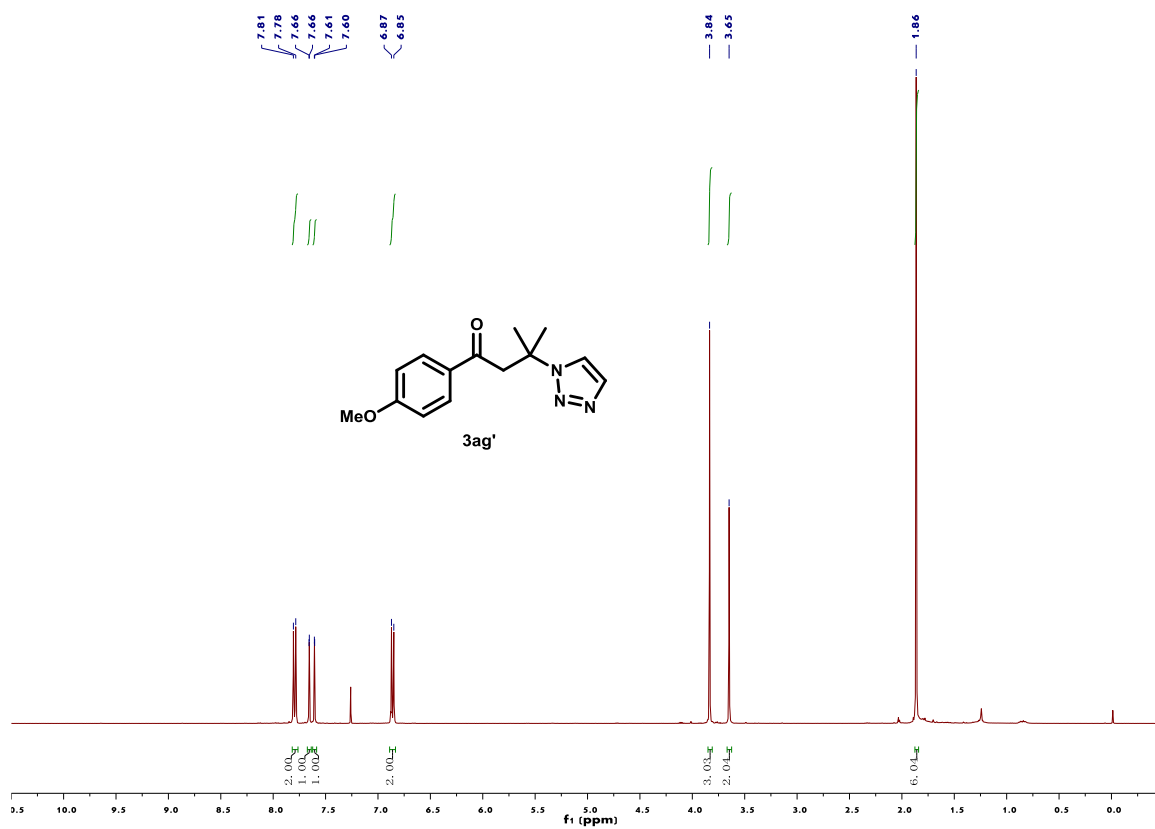

Supplementary Figure 233.  $^1\text{H}$  NMR (400 MHz,  $\text{CDCl}_3$ ) spectrum for 3ag'

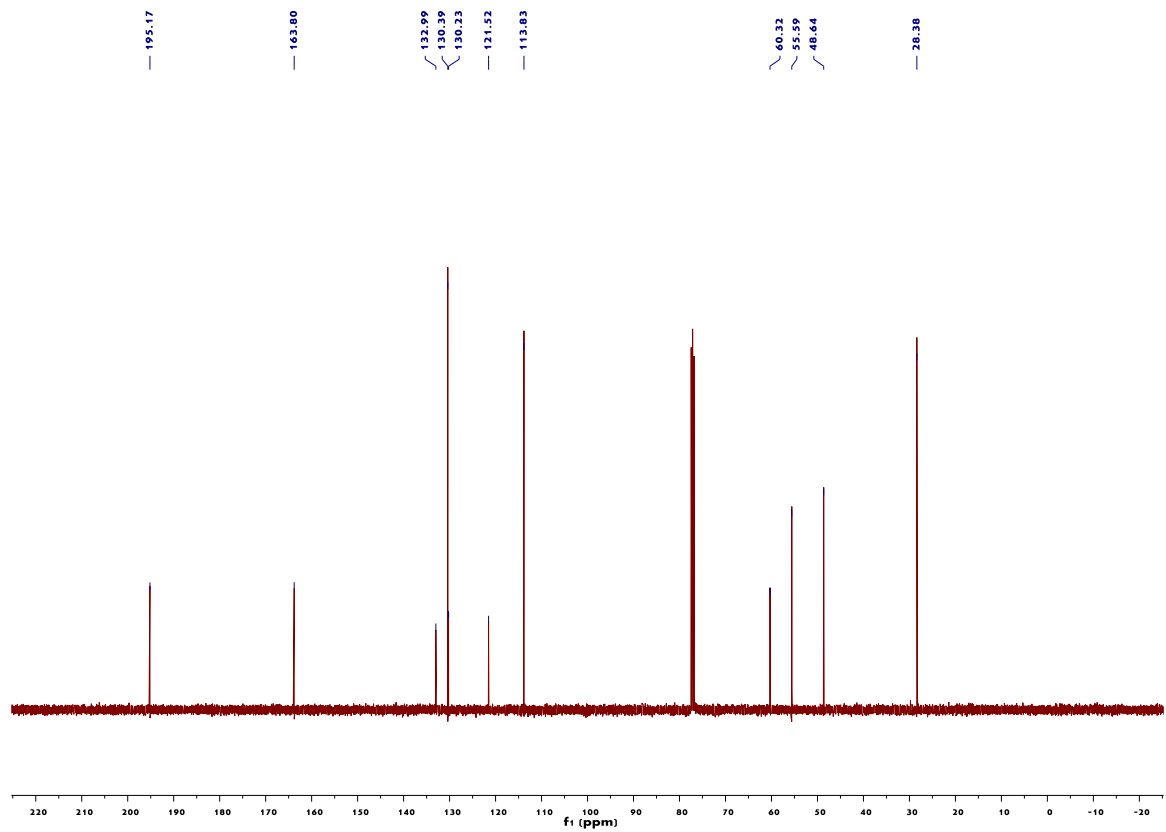

Supplementary Figure 234.  $^{13}\text{C}$  NMR (100 MHz,  $\text{CDCl}_3$ ) spectrum for 3ag

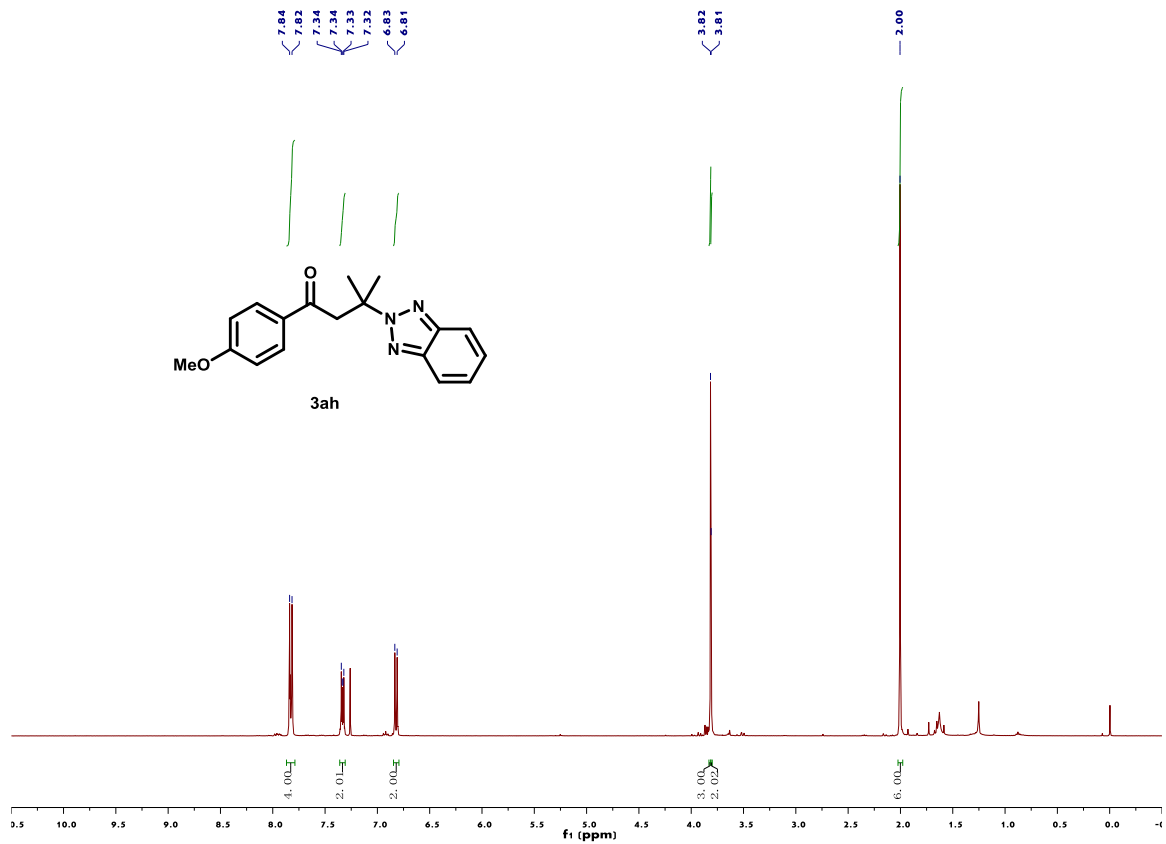

Supplementary Figure 235.  $^1\text{H}$  NMR (400 MHz,  $\text{CDCl}_3$ ) spectrum for 3ah

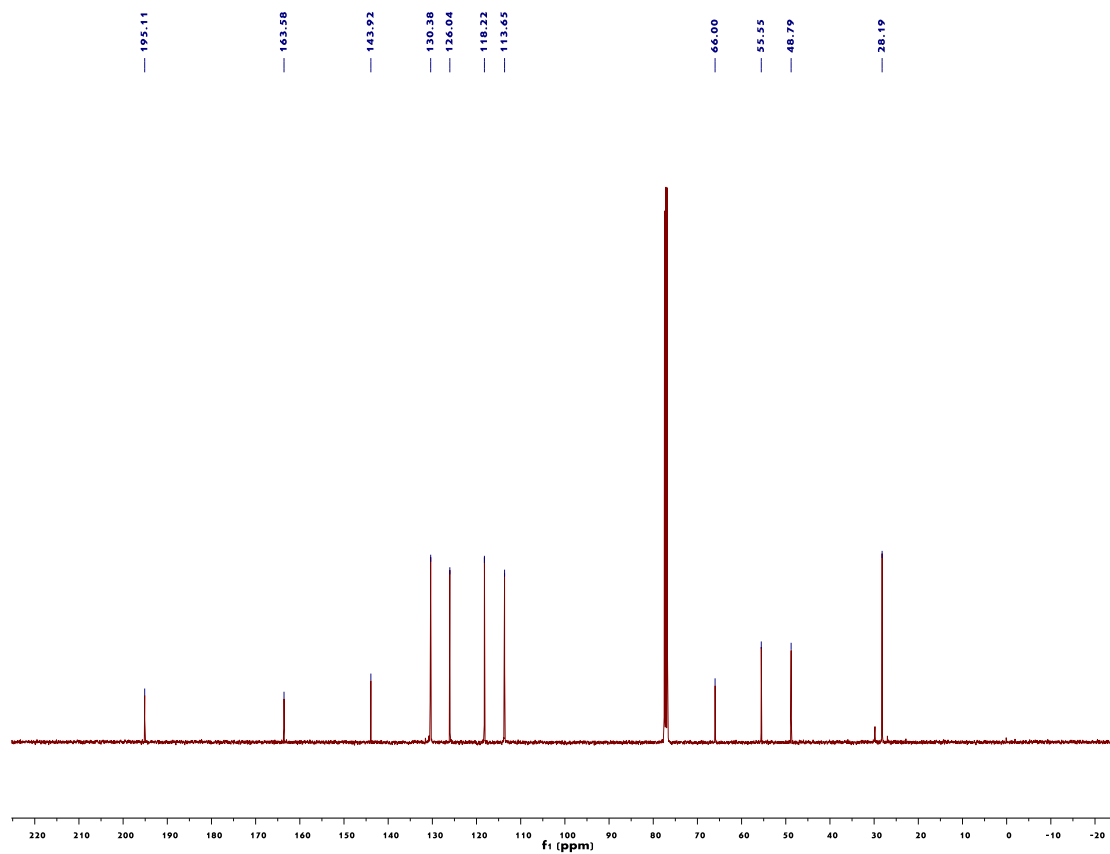

Supplementary Figure 236.  $^{13}\text{C}$  NMR (100 MHz,  $\text{CDCl}_3$ ) spectrum for 3ah

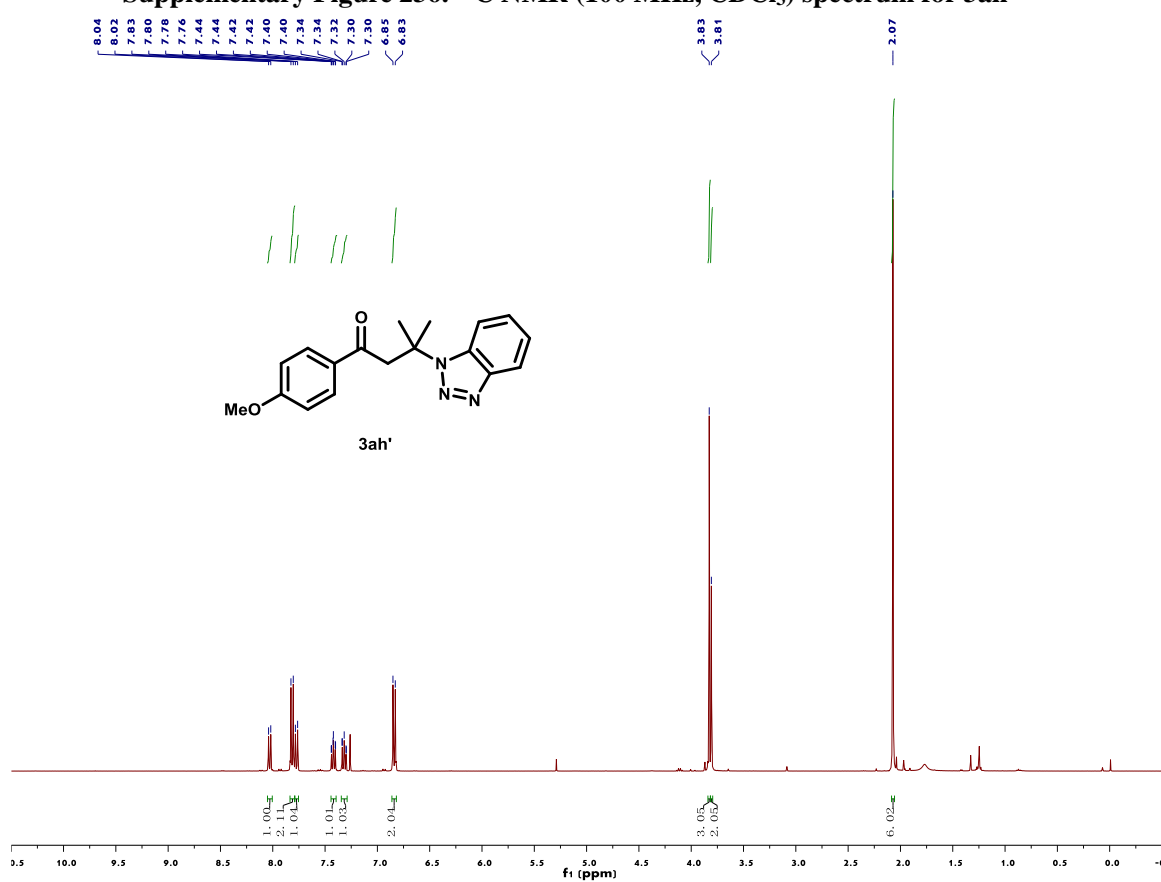

Supplementary Figure 237.  $^1\text{H}$  NMR (400 MHz,  $\text{CDCl}_3$ ) spectrum for 3ah'



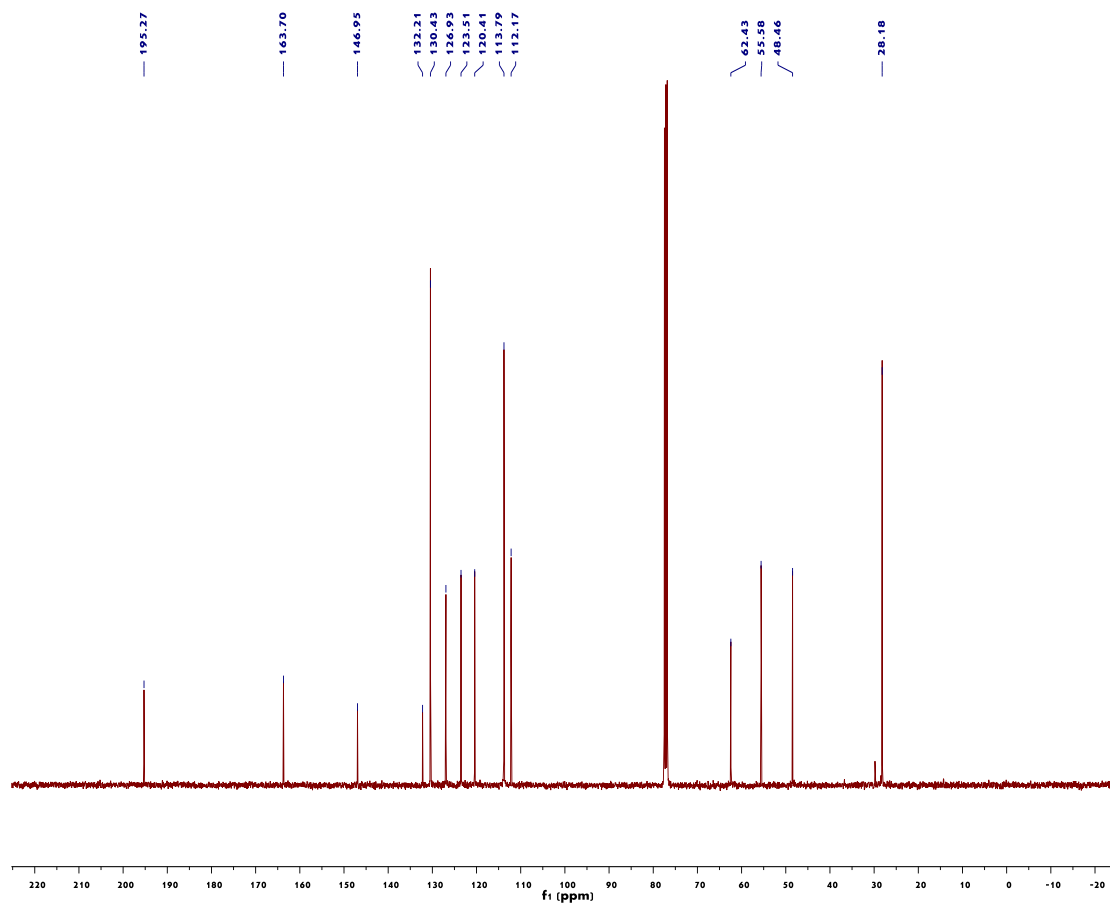

Supplementary Figure 238. <sup>13</sup>C NMR (100 MHz, CDCl<sub>3</sub>) spectrum for 3ah<sup>7</sup>

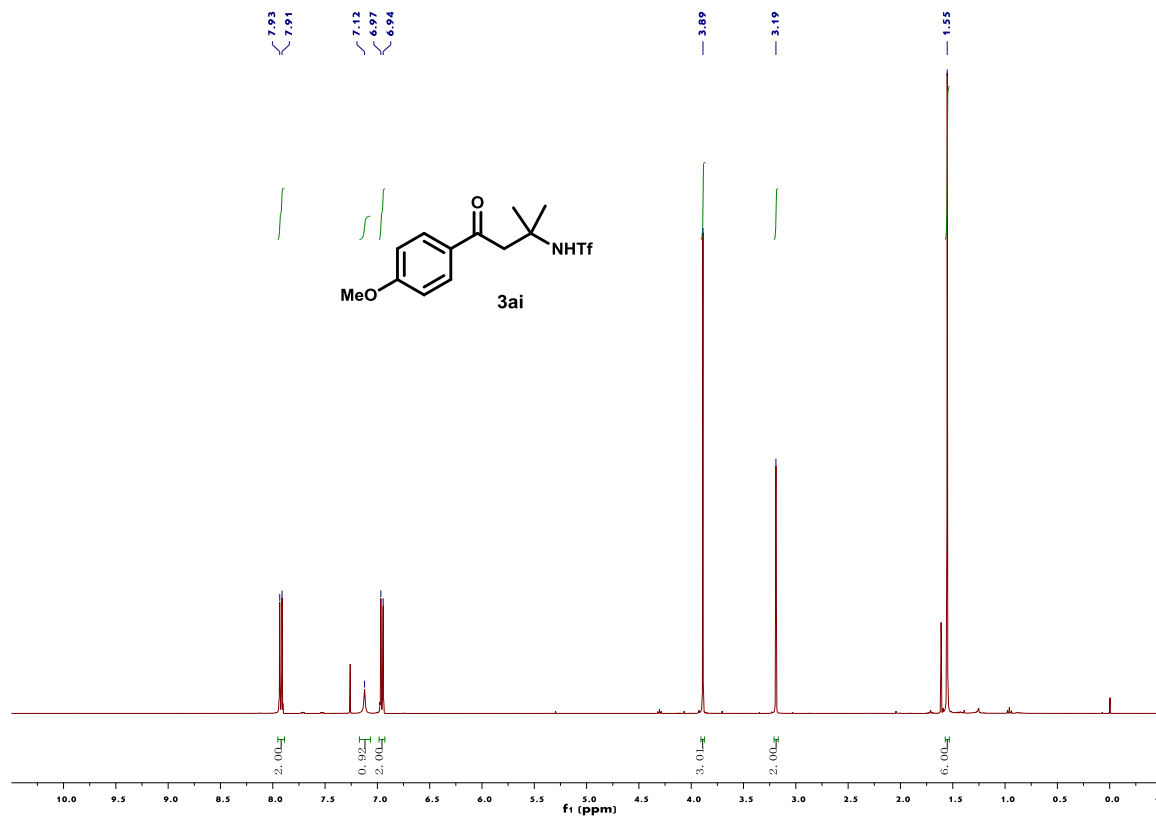

Supplementary Figure 239. <sup>1</sup>H NMR (400 MHz, CDCl<sub>3</sub>) spectrum for 3ai

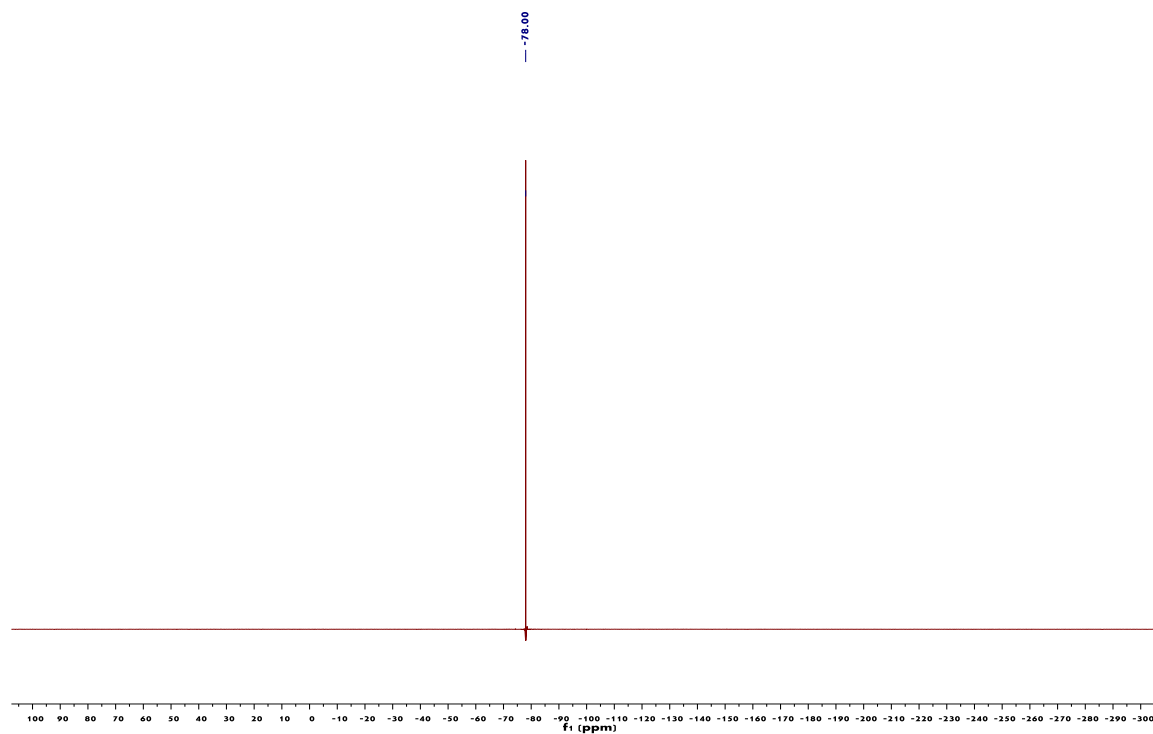

Supplementary Figure 240.  $^{19}\text{F}$  NMR (376 MHz,  $\text{CDCl}_3$ ) spectrum for 3ai

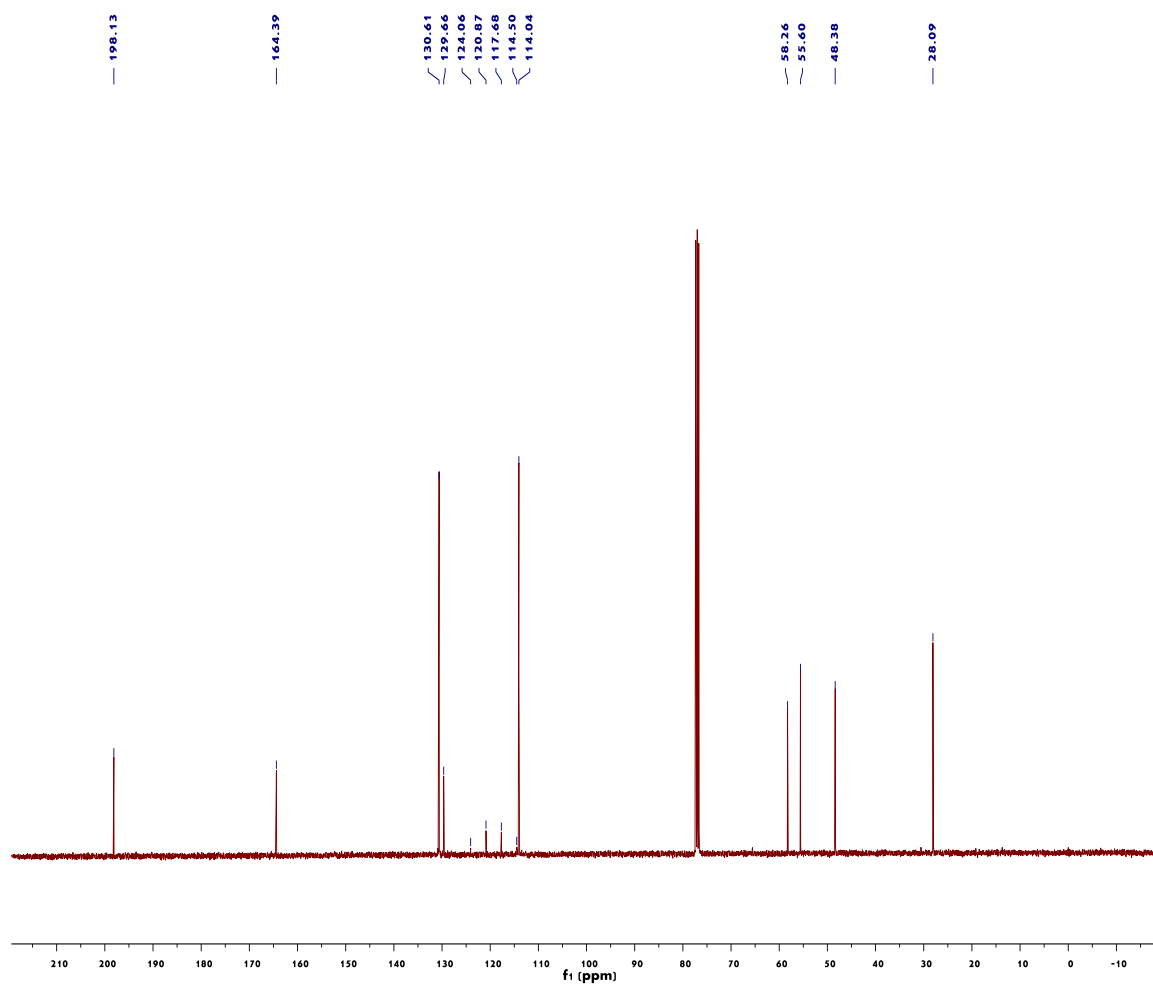

Supplementary Figure 241.  $^{13}\text{C}$  NMR (100 MHz,  $\text{CDCl}_3$ ) spectrum for 3ai

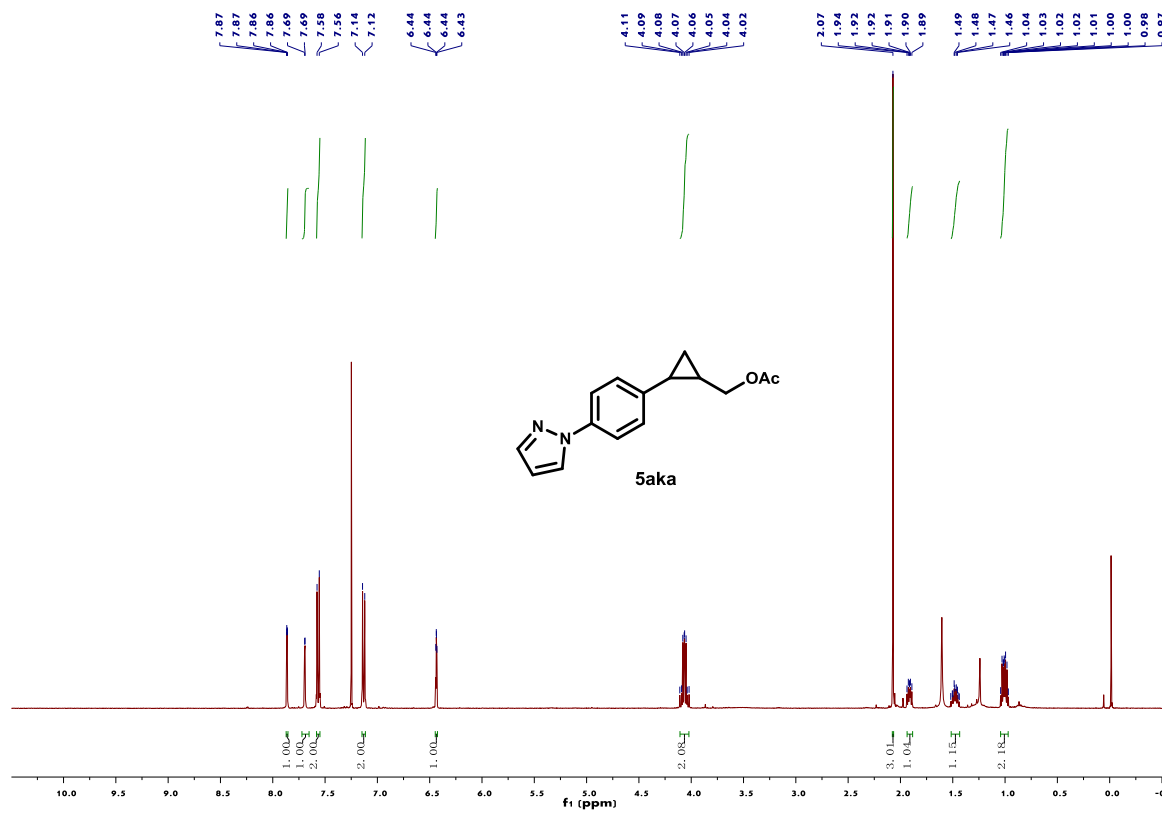

Supplementary Figure 242. <sup>1</sup>H NMR (400 MHz, CDCl<sub>3</sub>) spectrum for 5aka

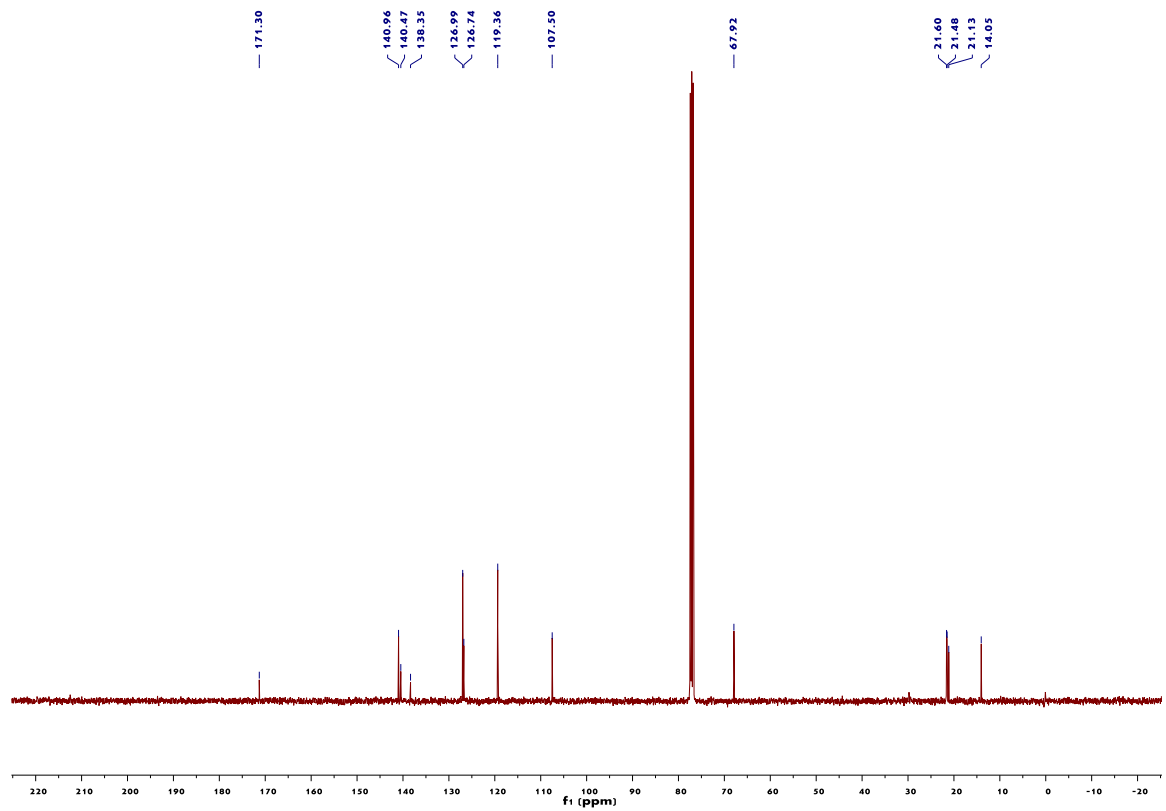

Supplementary Figure 243. <sup>13</sup>C NMR (100 MHz, CDCl<sub>3</sub>) spectrum for 5aka



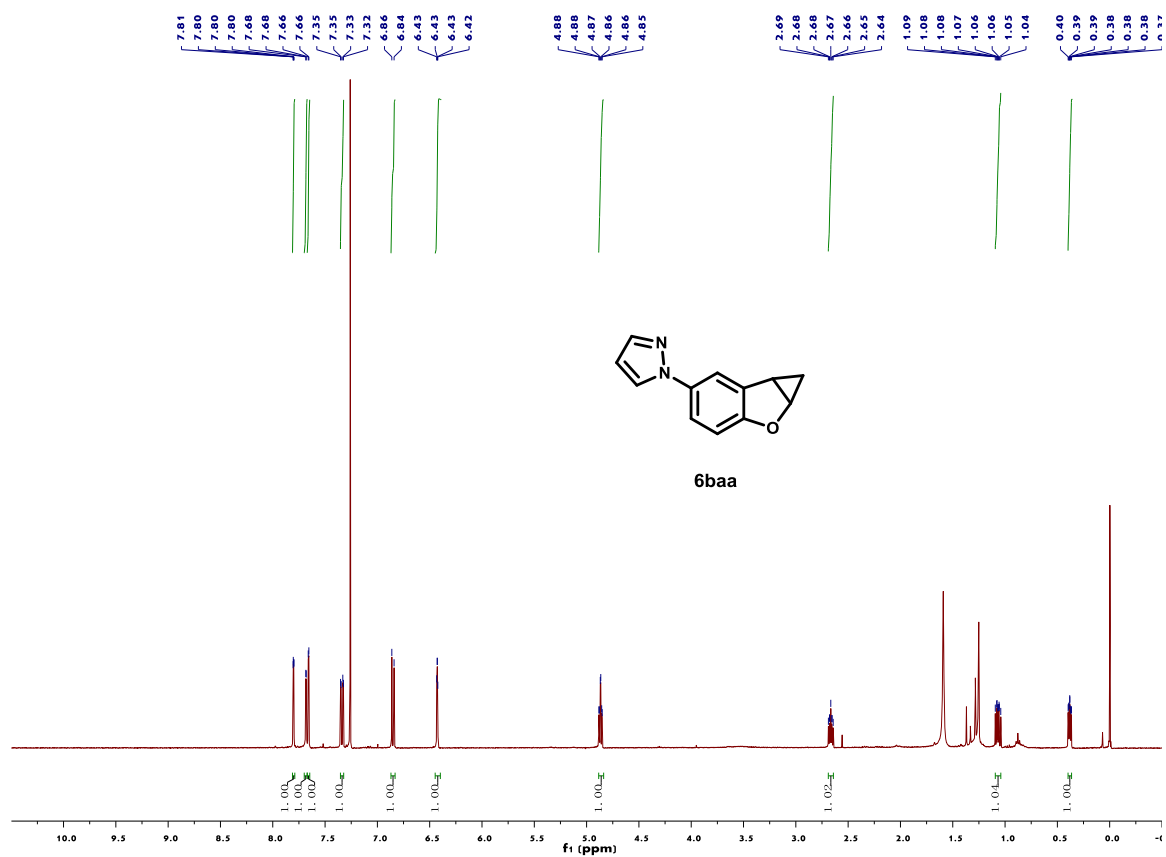

Supplementary Figure 246.  $^1\text{H}$  NMR (400 MHz,  $\text{CDCl}_3$ ) spectrum for 6baa

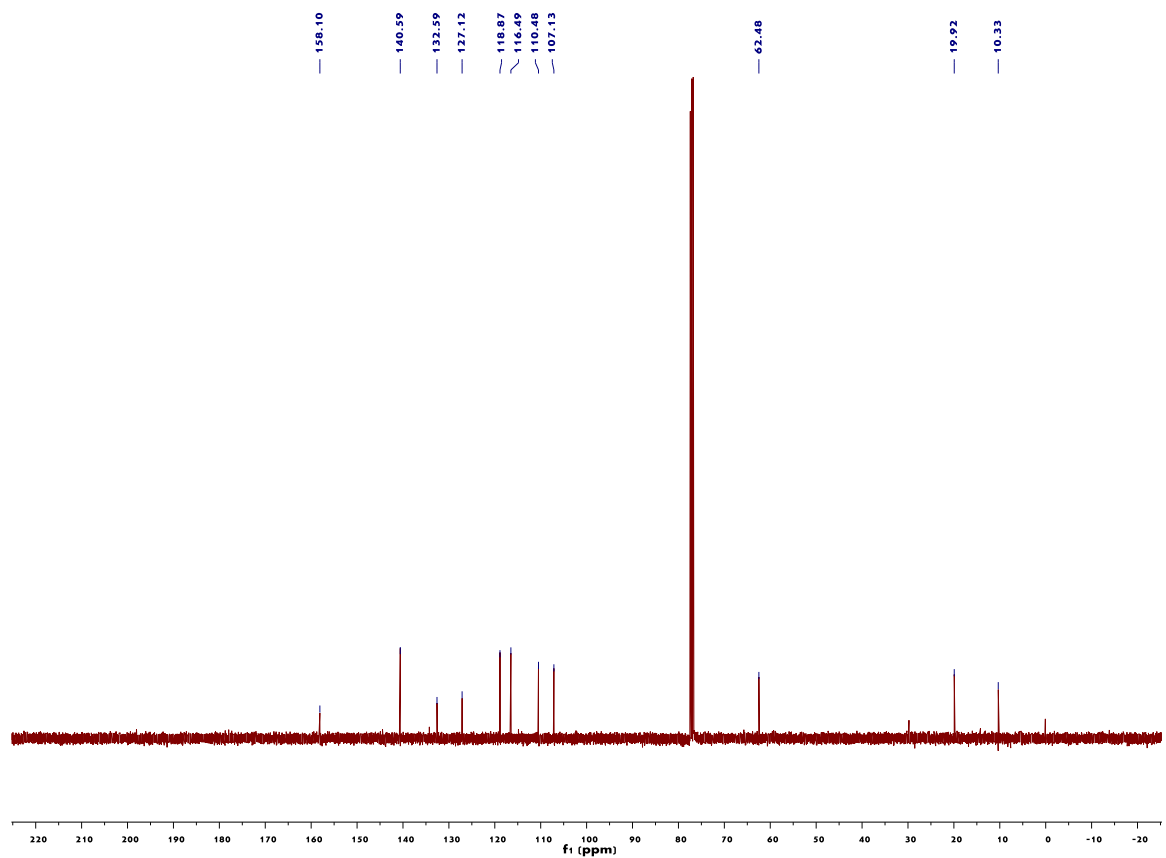

Supplementary Figure 247.  $^{13}\text{C}$  NMR (100 MHz,  $\text{CDCl}_3$ ) spectrum for 6baa

## Supplementary References

1. Wilger, D. J., Grandjean, J. M. M., Lammert, T. R., Nicewicz, D. A. The direct anti-Markovnikov addition of mineral acids to styrenes. *Nat. Chem.* **6**, 720-726 (2014).
2. Choi, G. J., Zhu, Q., Miller, D. C., Gu, C. J., Knowles, R. R. Catalytic alkylation of remote C–H bonds enabled by proton-coupled electron transfer. *Nature* **539**, 268- (2016).
3. Joshi-Pangu, A., Lévesque, F., Roth, H. G., Oliver, S. F., L. C. Campeau, Nicewicz, D., DiRocco, D. A. Acridinium-Based Photocatalysts: A Sustainable Option in Photoredox Catalysis. *J. Org. Chem.* **81**, 7244-7249 (2016).
4. Francoeur, S., Martel, J., Wilb, N., Charette, A.-B. New Family of Cyclopropanating Reagents: Synthesis, Reactivity, and Stability Studies of Iodomethylzinc Phenoxides. *Angew. Chem. Int. Ed.* **39**, 4539-4542 (2000).
5. Chen, D.-H., Huang, D.-S., Shi, Y. Synergistic effect of additives on cyclopropanation of olefins. *Org. Biomol. Chem.* **11**, 5588-5591 (2013).
6. Cahard, E., Schoenebeck, F., Garnier, J., Cutulic, S. P. Y., Zhou, S.-Z., Murphy, J. A. Electron Transfer to Benzenes by Photoactivated Neutral Organic Electron Donor Molecules. *Angew. Chem. Int. Ed.* **51**, 3673-3676 (2012).
7. Wong, Y.-C., Ke, Z.-H., Yeung, Y.-Y. Lewis Basic Sulfide Catalyzed Electrophilic Bromocyclization of Cyclopropylmethyl Amide. *Org. Lett.* **17**, 4944-4947 (2015).
8. Sugawara, M., Yoshida, J.-I. Remarkable  $\gamma$ -Effect of Tin: Acid-Promoted Cyclopropanation Reactions of  $\alpha$ -((Alkoxy carbonyl)oxy)stannanes with Alkenes. *J. Am. Chem. Soc.* **119**, 11986-11987 (1997).
9. Dai, W.-P., Zhang, X.-X., Zhang, J., Lin, Y.-Y., Cao, S. Synthesis of Exocyclic Trisubstituted Alkenes via Nickel - Catalyzed Kumada - Type Cross -

- Coupling Reaction of gem - Difluoroalkenes with Di - Grignard Reagents. *Advanced. Syn. Catal.* **358**, 183-187 (2016).
10. Neelamegam, R., Ricq, E. L., Malvaez, M., Patnaik, D., Norton, S., Carlin, S. M., Hill, I. T., Wood, M. A., Haggarty, S. J., Hooker, J. M. Brain-Penetrant LSD1 Inhibitors Can Block Memory Consolidation. *ACS Chemical Neuroscience*, **3**(2), 120-128 (2012).
  11. Fotsch, C., Bo, Y.-X., Doherty, E. M. Discovery of Potent, Orally Available Vanilloid Receptor-1 Antagonists. Structure–Activity Relationship of N-Aryl Cinnamides. *J. Med. Chem.* **48**, 71-90 (2005).
  12. Sekiguchi, Y., Kanuma, K., Sakagami, K., Hayashi, M., Kashiwa, S., Omodera, K. 1-NAPHTHYL ALKYLPIPERIDINE DERIVATIVE. *WO 2008044632 A1* Apr 17, **2008**
  13. Feng, Q., Song, Q. Aldehydes and Ketones Formation: Copper-Catalyzed Aerobic Oxidative Decarboxylation of Phenylacetic Acids and  $\alpha$ -Hydroxyphenylacetic Acids. *J. Org. Chem.* **79**, 1867-1871 (2014).
  14. Onodera, S., Ishikawa, S., Kochi, T., Kakiuchi, F. Direct Alkenylation of Allylbenzenes via Chelation-Assisted C–C Bond Cleavage. *J. Am. Chem. Soc.* **140**, 9788-9792 (2018).
  15. Lu, Z., Parrish, J. D., Yoon, T. P. [3+2] Photooxygenation of aryl cyclopropanes via visible light photocatalysis. *Tetrahedron* **70**, 4270-4278 (2014)
  16. Wozniak, Ł., Murphy, J. J., Melchiorre, P. Photo-organocatalytic Enantioselective Perfluoroalkylation of  $\beta$ -Ketoesters. *J. Am. Chem. Soc.* **137**, 5678-5681 (2015).
  17. Kandukuri, S. R., Bahamonde, A., Chatterjee, I., Jurberg, I. D., Escudero-Adán, E. C., Melchiorre, P. X - Ray Characterization of an Electron Donor - Acceptor Complex that Drives the Photochemical Alkylation of Indoles. *Angew. Chem. Int. Ed.* **54**, 1485-1489 (2015).
